# Supplementary material
Source: PubMed Central journal article supplement (PMC10875682)
Supplement: NIHMS1964383-supplement-Supplemental_Information.pdf [file NIHMS1964383-supplement-Supplemental_Information.pdf]

Supplementary Information

## **Asymmetric Carbohydroxylation of Alkenes Using Photoenzymatic**

### **Catalysis**

Yao Ouyang, Joshua Turek-Herman, Tianzhang Qiao, Todd K. Hyster\*

**Affiliation:**

Department of Chemistry and Chemical Biology, Cornell University, Ithaca, New York 14850, United States

\*Corresponding author. Email: [thyster@cornell.edu](mailto:thyster@cornell.edu).

## Table of Contents

|                                                                           |     |
|---------------------------------------------------------------------------|-----|
| 1. General information.....                                               | 3   |
| 2. Detailed experimental procedures .....                                 | 10  |
| Initial panel of ‘ene’-reductases screened for carbohydroxylation.....    | 10  |
| Control experiments. ....                                                 | 11  |
| Site Saturation Mutagenesis of MorB catalysts for carbohydroxylation..... | 11  |
| General procedure for enzymatic reaction.....                             | 21  |
| Product derivatization.....                                               | 22  |
| Substrates with cyclization coproducts.....                               | 23  |
| Substrates limitations.....                                               | 24  |
| General procedures for the preparation of alkenes .....                   | 24  |
| General procedure for the preparation of racemic compounds .....          | 27  |
| Absolute configuration determination .....                                | 82  |
| UV-Vis experiment .....                                                   | 83  |
| Density functional theory (DFT) calculations .....                        | 84  |
| Proposed mechanism.....                                                   | 99  |
| 3. NMR spectra .....                                                      | 100 |
| References.....                                                           | 160 |

## 1. General information

**General.** Unless otherwise noted, all chemicals and reagents for chemical reactions were obtained from commercial suppliers and used as received (Sigma-Aldrich, Oakwood Chemical, Combi-Blocks, TCI, and VWR). GDH-105 was purchased as cell-free lysates from Codexis and were used as received. Silica gel chromatography purifications were carried out using AMD Silica Gel 60.  $^1\text{H}$  and  $^{13}\text{C}$  NMR spectra were recorded on a Bruker UltraShield Plus (500 and 126 MHz, respectively) instrument, and are internally referenced to residual proton signals in  $\text{CDCl}_3$  (7.26 ppm),  $\text{CD}_3\text{CN}$  (1.94 ppm) or  $\text{CD}_3\text{OD}$  (3.31 ppm).  $^{19}\text{F}$  NMR spectra were recorded on a Bruker 282 MHz instrument.  $^1\text{H}$  NMR data are reported as follows: chemical shift ( $\delta$  ppm), multiplicity (s = singlet, brs = broad singlet, d = doublet, t = triplet, q = quartet, m = multiplet, dd = doublet of doublet, dt = doublet of triplet, ddd = doublet of doublet of doublet), coupling constant (Hz), and integration. Data for  $^{13}\text{C}$  NMR are reported in terms of chemical shift relative to  $\text{CDCl}_3$  (77.16 ppm),  $\text{CD}_3\text{CN}$  (1.32 ppm and 118.26 ppm) or  $\text{CD}_3\text{OD}$  (49.00 ppm). High resolution mass spectra (HRMS) were obtained on an Agilent 6220 LC/MS with an electrospray ionization time-of-flight (ESI-TOF) detector, or on an Agilent 7200 GC QTOF/MS with electron ionization mode, or on a Thermo Fisher Scientific Exactive series DART Mass Spectrometer.

**Chromatography.** Analytical high performance liquid chromatography (HPLC) and Electron Spray Ionization (ESI) mass spectrometry were carried out using an Agilent 1260 Infinity LCMS System. Yields and conversions were determined on a Poroshell C18 column (4.6 x 50 mm, 2.7  $\mu\text{m}$ ) against an internal standard 1,3,5-tribromobenzene (TBB) at 210 nm. Chiral HPLC was conducted using an Agilent 1260 Infinity Chiral HPLC system with isopropanol and hexanes as the mobile phases. Chiral OJ-H, OD-H, IA-H, IB-H, IC-H, and AS-H columns were used to separate enantiomers (4.6 x 250 mm, 5  $\mu\text{m}$ ).

**Cloning.** pET22b (+) was used as a cloning and expression vector for all enzymes described in this study. Genes for all 'ene'-reductases were purchased as gBlocks from IDT and cloned using the Gibson cloning method.<sup>1</sup> All C-terminal 6xHis tagged constructs were cloned directly between the NdeI and XhoI restriction sites. N-terminal 6xHis tagged constructs were created by the introduction of an N-terminal 6xHis sequence directly after the NdeI site and replacement of the C-terminal 6xHis tag with an XhoI cut site. Cloned plasmids were transformed into *E. coli*. DH5- $\alpha$  cells for storage, and *E. coli*. BL21 (DE3) electrocompetent cells for expression.

**Protein and DNA Sequence.**

Morphinone reductase (MorB). UniProtKB-Q51990 (Q51990\_PSEPU)

Genebank accession number: AAC43569

Protein Sequence:

MPDTSFSNPGLFTPLQLGSLSLPNRVIMAPLTRSRTPDSVPGRLQIYYGQRASAGLIISEATN  
ISPTARGYVYTPGIWTD AQEAGWKGVVEAVHAKGGRIALQLWHVGRVSHELVQPDGQQP  
VAPSALKAEGAECFVEFEDGTAGLHPTSTPRALETDEIPGIVEDYRQAAQRAKRAGFDMVE  
VHAANA CLPNQFLATGTNRRTDQYGGSIENRARFLEVVDVAEVEFGPERV GIRLTPFLELF  
GLTDDEPEAMAFYLAGELDRRGLAYLHFNEPDWIGGDITYPEGFREQMRQRFKGGLIYCG  
NYDAGRAQARLDDNTADAVAFGRPFIANPDLPERFRLGAALNEPDPSTFYGGAEVGYTDY  
PFLDNH DRLGHHHHHH

DNA Sequence:

ATGCCCGACACTTCTTTTTCGAATCCAGGACTTTTTACTCCTCTTCAGTTGGGTAGTCTGTC  
TCTTCAAATCGTGT CATAATGGCACCTTTAACCCGCTCACGCACGCCAGATTCTGTACCT  
GGACGCCTTCAACAGATATACTATGGTCAACGCGCCAGCGCCGGGTTAATCATCTCCGAA  
GCGACAAATATCAGTCCCACCGCTCGGGGATACGTATACACGCCAGGCATTTGGACTGAC  
GCTCAGGAGGCCGGTTGGAAAGGTGTGGTTCGAAGCTGTCCATGCTAAAGGGGGTCGTATA  
GCGTTGCAGTTATGGCATGTCGGCCGGGTCTCTCATGAGCTGGTGCAGCCAGACGGCCAA  
CAACCCGTGGCACCATCCGCCTTAAAAGCCGAAGGGGCCGAGTGCTTTGTCTGAATTCGAG  
GATGGGACTGCTGGCCTGCACCCTACGTCAACTCCCAGAGCCCTGGAGACAGATGAGATA  
CCCGGTATTGTTGAAGATTACAGACAGGCCGCGCAGCGTGCGAAGCGGGCCGGATTTCGAT  
ATGGTAGAGGTCCACGCGCAAATGCTTGTCTTCTAATCAGTTCTTGGCGACAGGAACC  
AATCGTCGCACAGACCAGTACGGTGGATCAATTGAGAACCGGGCTAGATTCCCATTAGAG  
GTTGTGCATGCTGTAGCCGAGGTATTCGGGCCCGAAAGAGTGGGGATACGGCTGACTCCT  
TTCTTGAGTTATTTGGATTAACGGATGATGAACCCGAGGCAATGGCTTTTTACCTTGCGG  
GAGAATTAGACCGCGTGGTTTAGCGTATTTACACTTTAATGAACCCGATTGGATAGGTG  
GGGACATCACGTACCCGGAAGGGTTTCGTGAGCAAATGCGTCAACGGTTCAAGGGGGGGC  
TTATATATTGTGAAACTACGACGCAGGTCGGGCCCAAGCCGGCTTGACGACAATACAG  
CAGATGCAGTGGCGTTTGGGCGTCCATTTATTGCCAACCCGACTTGCCAGAACGTTTCCG  
CTTAGGAGCAGCGCTGAACGAACCTGACCCCTCTACTTTTTACGGCGGGGCAGAGGTGGG  
GTACACAGACTACCCGTTCTGGACAACGGTCATGACCGCCTGGGACTCGAGCACCACCA  
TCACCACCACTGA

Caulobacter segnis Alkene Reductase (CsER).

GenBank accession number: A0A2W5V2R8

CsER protein sequence:

MPNLF DPLRVGDLNLPNRVVMAPLTRLRAGPTHIPNALMAEYYGQRASAGLLITEGVPVAPQ  
GVGYAGVPGIWSKEQTEGWKQVTKAVHDKGGRIFMQIWHVGRISDPELLNGELPIAPSAIAA  
KGHVSLLRPQRDYPTPRALSTEEVAGVVEAFRQGAENAQAAGFDGVQLHGANGYLLDQFLQ



DGSNQRTDQYGGSIENRARLLLEAADA AISVWGADRVGVHLAPRADSHSMGDSNLAATFGH  
VAKALGERKIGFVSAREYEADSLGPLDKKAFGGVYIANEKFDLASANAAIEAGKADAIAFGK  
AYIANPDLVERLKAGAALNTPDPATFYGFENGPRGYTDYPTLAQVREPALEHHHHHH.

CsER DNA sequence:

ATGCCGAATTTGTTTGATCCGCTTCGTGTGGGAGACCTTAATTTGCCTAATCGTGTCTGTGA  
TGGCACCCCTGACTCGCTTACGCGCTGGTCTACACACATCCCGAACGCTCTGATGGCAGA  
ATACTATGGGCAGCGTGCAAGTGCAGGCTTACTTATTACGGAGGGAGTTCAGTGGCGCC  
CCAAGGGGTTGGGTACGCTGGTGTTCCTGGAATTTGGTCCAAGGAACAGACCGAAGGCTG  
GAAGCAAGTCACAAAAGCTGTCCACGACAAGGGCGGCCGCATCTTCATGCAAATCTGGCA  
CGTTGGCCGCATCAGCGACCCGGAGTTGTTAAACGGAGAATTGCCGATTGCGCCAAGTGC  
TATTGCCGCTAAAGGACATGTAAGCCTTTTACGCCCGCAACGCGATTACCCTACCCCCCGT  
GCACTTTCAACCGAGGAGGTGGCAGGAGTAGTCGAAGCCTTCCGTCAGGGTGTGAAAAT  
GCTCAGGCAGCGGGCTTTGACGGGGTCCAGTTGCATGGAGCTAACGGCTACCTTTTGGAT  
CAGTTTTTACAGGACGGGAGTAATCAACGCACGGATCAGTATGGGGGTTGATTGAGAAC  
CGTGCCCGCCTGCTGTTGGAGGCAGCCGATGCGGCAATTAGCGTCTGGGGAGCAGATCGC  
GTAGGCGTGCACCTGGCCCCGCTGCGGACTCCCATTCATGGGTGACTCGAACCTGGCC  
GCGACCTTTGGTCACGTAGCGAAGGCATTAGGGGAGCGCAAGATCGGTTTTTGTACGCGCA  
CGCGAATATGAGGCCGCTGACTCTTTGGGACCGGATTTGAAGAAAGCATTCCGAGGAGTT  
TATATTGCGAATGAGAAATTTGATCTTGCCTCTGCTAACGCCGCTATTGAGGCAGGCAAA  
GCGGATGCCATCGCGTTTGGCAAAGCCTACATCGCAAATCCCGATTTAGTGAACGTCTTA  
AAGCCGGGGCAGCTTTAAACACCCCGGATCCGGCGACTTTCTATGGCTTCGAAAATGGTC  
CTCGCGGTATACGATTACCCTACCTTGGCTCAGGTCCGCGAGCCCGCCCTCGAGCACCA  
CCATCACCACCACTGA

Old yellow enzyme 2 (OYE2) from *Saccharomyces cerevisiae*.

Genbank accession number: AAA83386.1

OYE2 protein sequence:

MPFVKDFKPQALGDTNLFKPIKIGNNELLHRAVIPPLTRMRAQHPGNIPNRD WAVEYYAQRAQ  
RPGTLIITEGTFPSPQSGGYDNAPGIWSEEQIKEWTKIFKAIHENKSFQWVQLWVLGWAAFPDT  
LARDGLRYDSASDNVYMNAEQEEKAKKANPQHSITKDEIKQYVKEYVQAAKNSIAAGADG  
VEIHSANGYLLNQFLDPHSNNRTDEYGGSIENRARFTLEVVDAVVDAIGPEKVGLRLSPYGVF  
NMSGGAETGIVAQYAYVLGELERRAKAGKRLAFVHLVEPRVTNPFLTEGEGEYNGGSNKFAY  
SIWKGPPIRAGNFALHPEVVREEVKDPRTLIGYGRFFISNPDLVDRLEKGLPLNKYDRDTFYKMS  
AEGYIDYPTYEEALKLGWDKNHHHHHHH.

OYE2 DNA sequence:

ATGCCCTTCGTGAAAGACTTCAAACCTCAAGCCCTGGGCGATACTAATTTATTTAAGCCAAT  
TAAAATTGGAAACAATGAGTTGTTACACCGCGCTGTAATTCCACCCTTAACCCGCATGCGCG  
CCCAACATCCAGGGAACATCCCTAATCGCGATTGGGCAGTCGAGTACTATGCTCAGCGTGCT  
CAGCGTCCGGGTACCCTTATCATCACGGAAGGAACGTTTCCGTCGCCGCAATCGGGAGGGT  
ATGACAACGCTCCCGGTATCTGGTTCGGAAGAAGCAGATTAAAGAATGGACCAAAAATCTTTAA  
AGCAATTCATGAGAATAAATCTTTCGCTGGGTCCAACCTTTGGGTCTGGGCTGGGCAGCC  
TTCCCTGACACATTGGCGCGTGACGGGCTTCGTTATGATAGTCTTCGGATAACGTGTATATG

AATGCTGAACAAGAAGAAAAGGCCAAAAAAGCAAACAATCCACAGCATTGATTACTAAA  
GACGAGATTAAGCAGTATGTTAAGGAATACGTACAAGCAGCAAAGAATTCTATTGCCGCAG  
GGCGCGACGGGGTAGAAATCCACTCTGCTAATGGGTACTTGCTTAACCAAGTTCCTGGACCC  
GCATTCAAACAACCGCACTGATGAGTACGGAGGGTCCATCGAAAATCGTGCACGTTTTACT  
TTAGAGGTCGTAGATGCTGTAGTCGACGCGATTGGCCCTGAGAAGGTAGGTTTTCGTTTAA  
GTCCTTATGGCGTGTTC AATTCAATGTCAGGGGGCGCTGAAACAGGTATCGTCGCGCAGTA  
CGCATACTCTTGGGAGAGCTGGAGCGTCGTGCTAAGGCTGGCAAGCGTTTAGCTTTTGTG  
CATTTAGTTGAACCGCGCGTGACAAACCCCTTCTTGACGGAAGGCGAAGGAGAGTATAACG  
GAGGATCGAATAAATTTGCGTATTCATTGGAAGGGCCCGATCATTGTCGCGGTAACCTTTG  
CCTTACATCCCGAAGTTGTTTCGCGAGGAAGTAAAAGACCCACGTACCTTGATCGGGTATGG  
CCGTTTCTTTATTTCAAACCCCGACTTGGTGGATCGCCTTGAAAAAGGTCTTCCCTTGAATA  
AGTATGACCGTGATACGTTCTACAAAATGTCAGCCGAAGGTTACATCGACTACCCACCTAC  
GAAGAGGCTTTGAAACTTGGTTGGGACAAGAACCACCACCATCACCACCCTGA.

Gluconobacter oxydans enoate reductase (GluER) from *Gluconobacter oxydans* 621H.  
Genbank accession number: AAW60280

GluER protein sequence:

MHHHHHPTLFDPIDFGPIHAKNRIVMSPLTRGRADKEAVPTPIMAEYYAQRASAGLIITEATGI  
SREGLGWPFAPGIWSDAQVEAWKPIVAGVHAKGGKIVCQLWHMGRMVHSSVTGTQPVSSSAT  
TAPGEVHTYEGKKPFEQARAIDAADISRILNDYENAARNAIRAGFDGVQIHAANGYLIDFLRN  
GTNHRTDEYGGVPENRIRFLKEVTERVIAAIGADRTGVRLSPNGDTQGCIDSAPETVFPAAKL  
LQDLGVAWLELREPGNGTFGKTDQPKLSPQIRKVFLRPLVLNQDYTFEAAQTALAEKDAI  
AFGRKFISNPDLPERFARGIALQPDDMKTWYSQGPEGYTDYPSATSGPN.

GluER DNA sequence:

ATGCACCACCATCACCACCACCCGACCCTTTTCGACCCCATCGATTCGGACCTATCCACGC  
CAAGAATCGTATCGTCATGTCCCCCTGACTCGCGGTCGCGCTGACAAAGAGGCGGTTCCA  
ACCCCATTTATGGCTGAATACTACGCCAACGCGCTTCGGCGGGTTTAATTACTGAAGC  
GACGGGGATTTCACCGGAAGGCTTAGGTTGGCCGTTTTCGCGCGGAATTTGGTCCGATGCA  
CAGGTTGAGGCGTGAAACCTATCGTCGCGGGTGTCCATGCAAAGGGCGGCAAGATCGTAT  
GTCAGCTTTGGCATATGGGCCGTATGGTACATTCTTCAGTTACAGGGACGCAGCCCGTAAGC  
AGTTCCGCCACTACTGCTCCAGGTGAGGTTACACCTATGAGGGCAAGAAGCCCTTCGAAC  
AAGCGCGTGCAATCGATGCTGCAGACATCTCCGCATCCTAACGATTACGAAAATGCAGC  
ACGTAATGCAATCCGCGCGGGTTTTGATGGAGTGCAGATCCACGCAGCCAATGGCTACCTT  
ATCGATGAGTTTTTTCGTAACGGAACCAATCATCGCACCGATGAGTATGGGGGGGTGCCGG  
AGAACCGTATTCGTTTCTTGAAAGAGGTAACAGAACGCGTCATCGCGGCGATTGGCGCTGA  
CCGTACGGGTGTGCGTCTGAGTCCAAACGGTGACACACAGGGTTGTATCGACAGTGCTCCC  
GAAACCGTTTTTGTTCCTGCCGCAAAGCTTTTGCAAGATTTAGGGGTAGCGTGGCTTGAGC  
TGCGTGAACCTGGTCCGAATGGTACGTTTGGAAAGACGGATCAACCAAATATCTCCACA  
AATCCGTAAGGTATTCCTTCGTCCATTGGTCTTAAATCAAGACTATACTTTTGAGGCGGCAC  
AGACGGCCCTGGCTGAGGGCAAGGCGGACGCTATTGCGTTTTGGCCGTAAGTTCATTTCAA  
TCCAGACTTGCTGAGCGCTTTGCCCGTGGCATCGCACTGCAACCAGACGATATGAAAACA  
TGGTACTCCCAAGGCCAGAGGGTTACACAGACTATCCATCCGCAACTTCTGGGCCGAAC

GA.

*Geobacillus kaustophilus* old yellow enzyme (GkOYE).

UniProtKB accession number: Q5KXG9.

GkOYE protein sequence

MNTMLFSPYTIRGLTLKNRIVMSPMCMYSCDTKDGAVRTWHKIHYPARAVGQVGLIIVEATGV  
TPQGRISERDLGIWSDDHIAGLRELVGLVKEHGAAIGIQLAHAGRKSQVPGEIAPSAPVFDSSP  
TPKEMTKADIEETVQAFQNGARRAKEAGFDVIEIHAAGHYLINEFLSPLSNRRQDEYGGSPENR  
YRFLGEVIDAVREVWDGPLFVRISASDYHPDGLTAKDYVPYAKRMKEQGVLDLVDVSSGAIVPA  
RMNVYPGYQVPFAELIRREADIPTGAVGLITSGWQAEIILQNGRADLVFLGRELLRNPYPYA  
AARELGAKISAPVQYERGWRFLEHHHHH.

GkOYE DNA sequence

ATGAATACAATGTTGTTTCAGTCCCTTATACAATCCGTGGTCTGACACTGAAAAACAGAATTGT  
GATGTCTCCCATGTGCATGTATTCTCGACACCAAAGATGGCGCAGTCCGTACATGGCACA  
AAATTCATTATCCGGCGCGTGCAGTGGGCCAGGTAGGCCTGATTATTGTGGAAGCAACAGG  
TGTGACTCCGCAGGGCCGTATCTCCGAACCGGATTGGGAATCTGGTCAGACGACCATATTG  
CTGGACTGCGTGAAGTGGTGGGACTGGTAAAGGAACACGGAGCGGCCATCGGAATCCAGT  
TAGCTCATGCGGGCCGTAAATCCCAGGTCCCAGGTGAAATTATTGCCCTTCTGCTGTACCG  
TTCGATGATTCGTCCCCGACCCCGAAAGAAATGACAAAAGCGGATATCGAAGAAACCGTAC  
AGGCATTCCAGAATGGTGCAGCGCCGTGCAAAAAGAAGCGGGATTCGATGTAATTGAGATTCA  
TGCGGCGCACGGATACCTGATCAATGAATTTCTGTCCCTCTGTCTAATCGGCGACAGGATG  
AGTACGGTGGATCGCCCGAAAACCGTTATCGTTTCTTGGGTGAAGTTATAGATGCCGTTTCGC  
GAAGTATGGGATGGACCGTTATTTGTTTCGCATTTCTGCAAGCGATTACCATCCCGATGGACT  
GACTGCTAAGGACTATGTGCCGTACGCGAAACGTATGAAAGAACAAGGGGTAGATTTAGTT  
GATGTTAGTTCAGGAGCAATCGTTCGGCACGGATGAACGTATATCCGGGCTATCAGGTACC  
GTTTCGCTGAACTTATTAGAAGAGAAGCGGACATTCCTACAGGAGCGGTTGGTCTGATTACG  
TCAGGGTGGCAAGCCGAAGAGATATTACAAAACGGGCGCGCGGATCTTGTGTTTTTAGGAC  
GCGAACTGCTGCGGAATCCCTATTGGCCCTACGCGGCTGCCAGAGAAGTGGGAGCCAAGAT  
TTCCGCGCCAGTTCAATACGAGCGCGGGTGGAGATTTCTCGAGCACCACCACCACCAC  
TGA.

Nicotinamide-dependent cyclohexanone reductase (NCR) from *Zymomonas mobilis*.

GenBank accession number: AAV90509.

NCR protein sequence:

MPSLFDPIRFGAFTAKNRIWMAPLTRGRATRDRHVPTEIMAEYYAQRASAGLIISEATGISQEGLG  
WPYAPGIWSDAQVEAWLPITQAVHDAGGLIFAQLWHMGRMVPSNVSGMQPVAPSASQAPGLG  
HTYDGGKPYDVARALRLDEIPRLDDYEKAARHALKAGFDGVQIHAANGYLIDEFIRDSTNHR  
HDEYGGAVENRIRLLKDVTERVIATIGKERTAVRLSPNGEIQGTVDSHPEQVFIPAAKMLSDLDI  
AFLGMREGAVDGTGFKTDQPKLSPEIRKVKPPLVLNQDYTFETAQAALDSGVADAISFGRPFI  
GNPDLPRRFFEKAPLTKDVETWYTQTPKGYTDYPLLGDHHHHHH.

NCR DNA sequence:

```
ATGCCGTCACTGTTTCGATCCAATCCGCTTTGGGGCTTTCACTGCAAAAAATCGTATCTGGAT
GGCGCCGTTAACACGGGGTTCGGGCAACCCGTGACCATGTCCCAACAGAGATAATGGCTGA
ATACTATGCCCAACGCGCATCCGCGGGCTTGATCATCAGCGAGGCGACCGGGATCAGCCAA
GAGGGCCTGGGCTGGCCCTATGCACCAGGAATCTGGAGTGATGCGCAGGTCGAGGCATGG
TTACCCATAACCCAAGCGGTACACGATGCCGGAGGTTTGATATTTGCACAACGTGGGCACAT
GGGGCGTATGGTGCCTTCCAACGTTTCTGGAATGCAACCTGTCGCACCTAGCGCTTCACAA
GCGCCCCGCTTGGGCCATACTTATGATGGCAAAAAGCCATACGATGTAGCCAGAGCATTGA
GACTTGACGAGATCCCACGGCTGCTGGACGACTATGAAAAGGCAGCTCGGCACGCACTGA
AAGCTGGGTTCGATGGAGTTCAGATTCATGCTGCCAACGGATACCTGATTGACGAGTTCATC
CGGGATTCAACAAATCATAGACACGACGAATACGGGGGGGCGGTTGAGAACAGAATACGG
TTATTGAAGGATGTCACTGAGCGGGTTATCGCAACCATCGGAAAGGAGCGCACAGCAGTGC
GTTTAAGTCCGAATGGAGAGATAACAAGGCACAGTAGACTCGCATCCAGAACAGGTATTTAT
CCCGGCTGCAAAGATGTTATCTGATTTAGATATCGCGTTCCTTGGGATGCGCGAGGGTGCTG
TAGACGGGACATTTGGCAAAACAGACCAGCCCAAACCTTTCGCCCAGATCCGTAAAGTTTT
CAAGCCACCCCTTGTTCTGAATCAAGATTACACTTTCGAGACTGCCCAGGCTGCGTTAGATT
CGGGTGTAGCCGATGCAATCAGTTTTGGTCGTCCATTGTTGGAATCCCGACTTACCGAGA
AGATTCTTTGAAAAGGCACCGTTAACTAAGGACGTAATTGAGACTTGGTACACTCAGACTC
CCAAAGGTTACACCGACTATCCACTGTTAGGTGATCTCGAGCACCACCATCACCACCACTG
A
```

The detailed expression and purification information of other tested 'ene'-reductases in this study, namely old yellow enzyme 2 (OYE2), gluconobacter oxydans enoate reductase (GluER), *Geobacillus kaustophilus* old yellow enzyme (GKOYE), *Caulobacter segnis* Alkene Reductase (CSER) and Nicotinamide-dependent cyclohexanone reductase (NCR), were described elsewhere<sup>2-5</sup>.

#### **MorB Protein Expression and Purification.**

Morphinone reductase (MorB) was produced in *E. coli* BL21 transformed with plasmid encoding MorB. Transformed glycerol stocks were used to initiate a 5 mL overnight culture in Luria-Bertani (LB) media with ampicillin (100 µg/mL at 37 °C and 250 rpm. Expression culture (500 mL in a 2 L baffled shake flask) containing ampicillin (100 µg/mL) and autoinducing mixtures (sterile filtered mixture of 1% glucose, 4% lactose and 15% glycerol, 40 mL/L media) was inoculated with 5 mL of the overnight culture, then grown at 30 °C and 250 rpm for 24 h. The cells were harvested by centrifugation (4000 x g, 20 min, 4 °C) and frozen at -80 °C for further purification.

Frozen cells were thawed and resuspended in buffer A (20 mM KPi pH 7, 300 mM NaCl, 25 mM imidazole) to a final concentration of 2 mL/g of wet cells. The resuspended cells were supplemented with lysozyme (1 mg/mL), FMN (1 mg/mL), DNase I (0.1 mg/mL), phenylmethylsulfonyl fluoride (PMSF, 1 mM) and allowed to shake for 30 min at 37 °C. The cells were further disrupted by sonication (2 x 4 min, output control 5, 35% duty cycle, Sonicator QSonica Q500 Ultra Sonicator). Lysates were centrifuged (20,000 x g, 1 h, 4 °C) to pellet insoluble materials. Proteins were purified using a nickel-NTA column (5 mL HisTrap HP, GE Healthcare, Piscataway, NJ) via an AKTASart purifier FPLC system (GE

Healthcare). Enzymes were eluted with buffer B (20 mM KPi pH 7, 300 mM NaCl, 250 mM imidazole) over five column volumes. Yellow fractions containing MorB enzymes were pooled, concentrated through buffer exchange into an imidazole free storage buffer (20 mM KPi, pH 7, 300 mM NaCl). Concentrated enzymes were aliquoted, flash-frozen in liquid N<sub>2</sub>, and then stored at -80 °C until later use. Protein purity was assessed with SDS-PAGE.

Protein concentrations were determined using the extinction coefficient (12.2 x mM<sup>-1</sup> cm<sup>-1</sup> at 446 nm) for free FMN released after protein denaturation. Extinction coefficient for MorB:  $\epsilon = 10.7 \times \text{mM}^{-1} \text{ cm}^{-1}$  at 463 nm. Both the WT and the final mutant MorB-B3 expressed pretty well, with approximate yield of 150 mg protein/L culture.

## 2. Detailed experimental procedures

**Supplementary Table 1. Initial panel of ‘ene’-reductases screened for carbhydroxylation.**

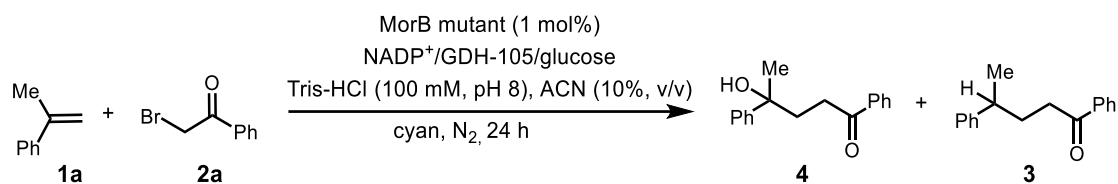

| entry | ‘ene’-reductases | yield <sup>a</sup> of <b>4</b> | er <sup>b</sup>   | yield <sup>a</sup> of <b>3</b> |
|-------|------------------|--------------------------------|-------------------|--------------------------------|
| 1     | GluERT36A        | 26%                            | 62:38             | 29%                            |
| 2     | NCR              | 10%                            | 59:41             | 18%                            |
| 3     | MorB             | 45%                            | 75:25             | 10%                            |
| 4     | CSAR             | 7%                             | 58:42             | 29%                            |
| 5     | GKOYE            | 4%                             | n.d. <sup>c</sup> | 2%                             |
| 6     | OYE2             | 10%                            | 66:34             | 26%                            |
| 7     | No enzyme        | 0%                             | n.d. <sup>c</sup> | 0                              |

Reaction conditions:  $\alpha$ -methylstyrene (1.3  $\mu$ L, 0.01 mmol, 1.0 eq, 16.6 mM),  $\alpha$ -bromoketone (5.94 mg, 0.03 mmol, 3 eq), GDH-105 (0.12 mg), NADP<sup>+</sup> (0.4 mg), glucose (1.8 mg) and purified ‘ene’-reductases (1 mol% based on  $\alpha$ -methylstyrene) in 100 mM Tris-HCl buffer pH 8.0, with 10% CH<sub>3</sub>CN (v/v) as cosolvent, final total volume is 660  $\mu$ L. Reaction mixtures were stirred under anaerobic conditions and irradiated with cyan LED at room temperature for 24 h. <sup>a</sup>Yield determined via LCMS relative to an internal standard (TBB). <sup>b</sup>Enantiomeric ratio (er) determined by HPLC on a chiral stationary phase. <sup>c</sup>n.d., not determined.

## Supplementary Table 2. Control experiments.

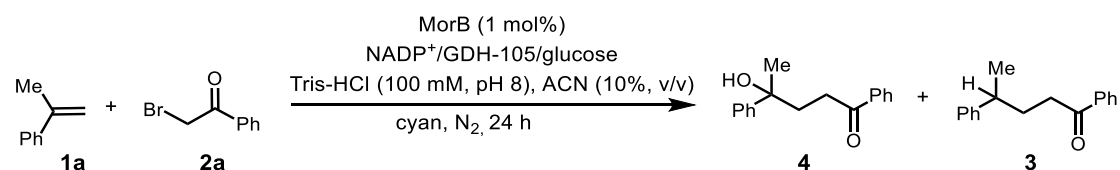

| entry | variation                          | yield <sup>a</sup> of <b>4</b> | er <sup>b</sup>   | yield <sup>a</sup> of <b>3</b> |
|-------|------------------------------------|--------------------------------|-------------------|--------------------------------|
| 1     | -                                  | 45%                            | 75:25             | 10%                            |
| 2     | w/o cofactor regeneration          | 28%                            | 75:25             | 3%                             |
| 3     | 50% glucose                        | 26%                            | 75:25             | 2%                             |
| 4     | w/o MorB, 1% FMN                   | 2%                             | 50:50             | 0                              |
| 5     | blue Kessil                        | 32%                            | 75:25             | 8%                             |
| 6     | dark                               | 14%                            | 75:25             | trace                          |
| 7     | w/o cofactor regeneration,<br>dark | 0                              | n.d. <sup>c</sup> | 0                              |

Reaction conditions:  $\alpha$ -methylstyrene (1.3  $\mu$ L, 0.01 mmol, 1.0 eq, 16.6 mM),  $\alpha$ -bromoketone (5.94 mg, 0.03 mmol, 3 eq), GDH-105 (0.12 mg), NADP<sup>+</sup> (0.4 mg), glucose (1.8 mg) and purified 'ene'-reductases (1 mol% based on  $\alpha$ -methylstyrene) in 100 mM Tris-HCl buffer pH 8.0, with 10% CH<sub>3</sub>CN (v/v) as cosolvent, final total volume is 660  $\mu$ L. Reaction mixtures were stirred under anaerobic conditions and irradiated with cyan LED at room temperature for 24 h. <sup>a</sup>Yield determined via LCMS relative to an internal standard (TBB). <sup>b</sup>Enantiomeric ratio (er) determined by HPLC on a chiral stationary phase. <sup>c</sup>n.d., not determined.

## Site Saturation Mutagenesis of MorB catalysts for carbonylation

Site saturation mutagenesis primers were designed using the PCR protocol from Kille *et al*<sup>6</sup>. The PCR products were digested with DpnI, repaired using Gibson Mix<sup>TM</sup>, and used to directly transform *E. coli* BL21 electrocompetent cells and plated on LB agar plates containing ampicillin (100  $\mu$ g/mL).

## Screening procedure for carbonylation with MorB mutants in 96-well plates

Single colonies were picked with sterile toothpicks and used to inoculate 500  $\mu$ L of LB media containing ampicillin (100  $\mu$ g/mL) in deep-well 96-well plates, and cultured overnight (30  $^{\circ}$ C, 250 rpm). Wells A2, B4, C6, D8, E10, F12, and G2 were embedded controls of the parent protein for that round of engineering. Well H12 was used as blank control. A glycerol stock plate of the library was prepared by mixing sterilized glycerol solution (50% v/v, 50  $\mu$ L/well) with the overnight cell cultures (50  $\mu$ L/well). The library was sealed and stored at -80  $^{\circ}$ C. The expression cultures (950  $\mu$ L of autoinducing Turbo Broth<sup>TM</sup> media containing 100  $\mu$ g/mL of ampicillin) in 96-well plates were inoculated by adding 50  $\mu$ L of the overnight cultures, and grown for 24 h (30  $^{\circ}$ C, 250 rpm). After growth and expression, cells were harvested by centrifugation (4000 x g, 20 min, 4  $^{\circ}$ C) and frozen at -80  $^{\circ}$ C for later screening.

The cell libraries were thawed and resuspended with lysis buffer (100  $\mu$ L/well) and allowed to shake for 1 h at 30 °C. The crude cell lysates were centrifuged (4000 x g, 20 min, 4 °C) and the supernatants (90  $\mu$ L/well) were transferred into a new white plastic 96-well plate for screening assay immediately.

In the Coy<sup>®</sup> chamber, the freshly prepared cofactor regeneration mix (38  $\mu$ L/well) and substrates (alkene: 0.4 mg/well, bromoacetophenone: 2 mg/well in 10  $\mu$ L CH<sub>3</sub>CN) were added to the supernatants (90  $\mu$ L/well), and the 96-well plate was sealed with adhesive plate-sealing film and shaken under anaerobic conditions with a fan cooling and irradiated using a Lumidox 96-well Cyan LED array at room temperature for 20 h. Upon completion, the reaction was quenched with acetonitrile (700  $\mu$ L/well), and the plate was sealed with a reusable silicone mat, shaken for 60 min, and centrifuged (4500 x g, 20 min). The supernatant (200  $\mu$ L/well) was filtered through a Millipore 96-well filter plate into a shallow-well plate (1000 x g, 1 min), and the filtrate was retained for LCMS analysis. Promising hits were chosen and subjected to cultivation in shaking flasks for further confirmation. The DNA plasmids of hits were extracted and submitted for sequencing to identify their mutations.

Recipe for Auto Inducing TB Media. For autoinducing cultures, Turbo Broth<sup>™</sup> media was supplemented with a sterile-filtered solution of 1.25% glucose, 5% lactose, and 15% glycerol (40 mL/L media).

Lysis buffer. 100 mM Tris-HCl (pH 8.0) buffer containing lysozyme (1 mg/mL), DNase I (0.1 mg/mL), FMN (1 mg/mL), and PMSF (1 mM).

cofactor regeneration. 100 mM Tris-HCl (pH 8.0) buffer containing GDH-105 (1.25 mg/mL), FMN (0.5 mg/mL), NADP<sup>+</sup> (8.5 mg/mL), and glucose (108 mg/mL).



## Site saturation mutagenesis **Round 1**

**Supplementary Table 3.** Template and target sites of the 1st round of SSM on MorB

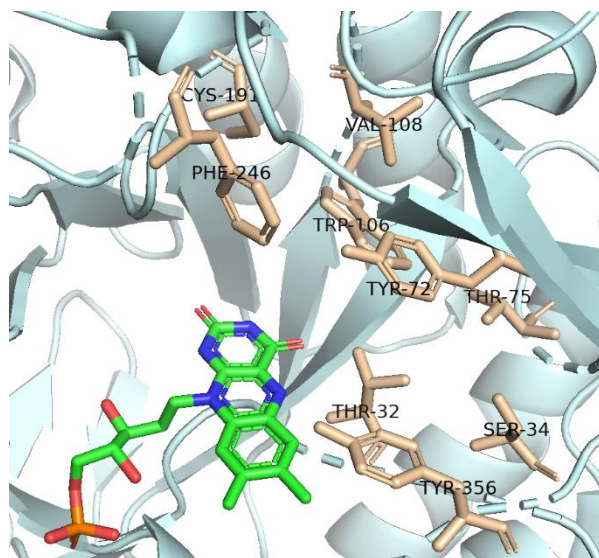

| Template | Target sites                                                    | Beneficial mutations            |
|----------|-----------------------------------------------------------------|---------------------------------|
| MorB-WT  | Y72, C191, F246, S34, T32, T75,<br>V108, W106, N189, F246, Y356 | Y72C<br>F246T<br>F246P<br>N189S |

**Supplementary Table 4.** Summary of the 1st round of SSM on MorB for carbohydroxylation.

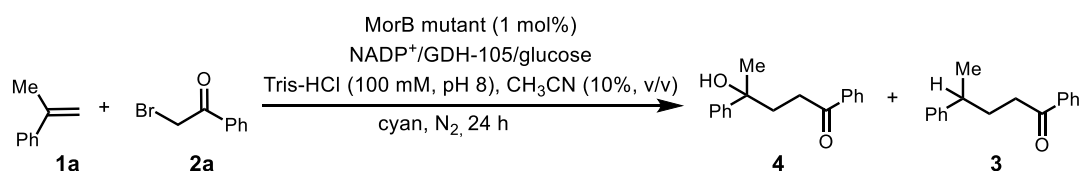

| Entry | MorB mutants | Yield of <b>4</b> (%) <sup>a</sup> | er <sup>b</sup> | Yield of <b>3</b> (%) <sup>a</sup> |
|-------|--------------|------------------------------------|-----------------|------------------------------------|
| 1     | WT           | 45                                 | 75:25           | 10                                 |
| 2     | Y72C         | 66                                 | 79:21           | 9                                  |
| 3     | F246T        | 44                                 | 77:23           | 6                                  |
| 4     | F246P        | 53                                 | 76:24           | 8                                  |
| 5     | N189S        | 56                                 | 77:23           | 8                                  |

Reaction conditions:  $\alpha$ -methylstyrene (0.65  $\mu$ L, 0.005 mmol, 1.0 eq, 8.3 mM),  $\alpha$ -bromoketone (2.98 mg, 0.015 mmol, 3.0 eq), GDH-105 (0.06 mg, 10 wt%), NADP<sup>+</sup> (0.2 mg, 5 mol%), glucose (0.9 mg, 1.0 eq) and purified 'ene'-reductases (1 mol% based on  $\alpha$ -methylstyrene) in 100 mM Tris-HCl buffer pH 8.0, with 10% CH<sub>3</sub>CN (*v/v*) as cosolvent, final total volume is 600  $\mu$ L. Reaction mixtures were stirred under anaerobic conditions and irradiated with cyan LED at room temperature for 24 h. <sup>a</sup>Yield determined via LCMS relative to an internal standard (TBB). <sup>b</sup> Enantiomeric ratio (er) determined by

HPLC on a chiral stationary phase.

### Site saturation mutagenesis **Round 2**

**Supplementary Table 5.** Templates and target sites of the 2nd round of SSM on MorB for carbohydroxylation.

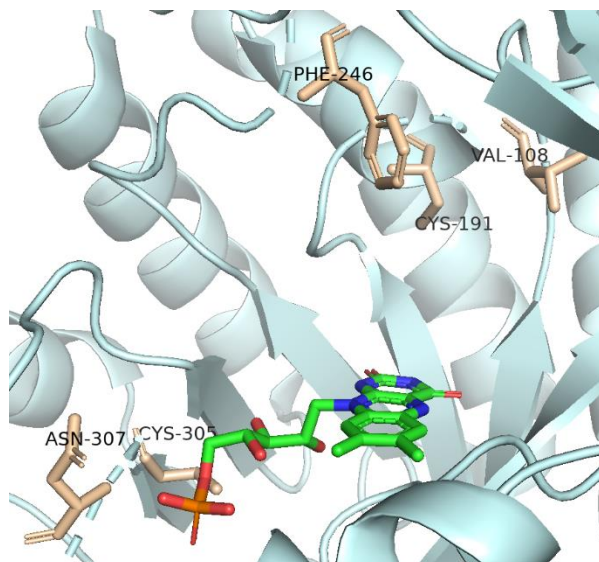

| Template | Target sites                 | Beneficial mutations                                 |
|----------|------------------------------|------------------------------------------------------|
| Y72C     | C191, F246, V108, C305, N307 | Y72C/C191G<br>Y72C/C191D<br>Y72C/F246L<br>Y72C/N307D |

**Supplementary Table 6.** Summary of the 2nd round of SSM on MorB for carbohydroxylation.

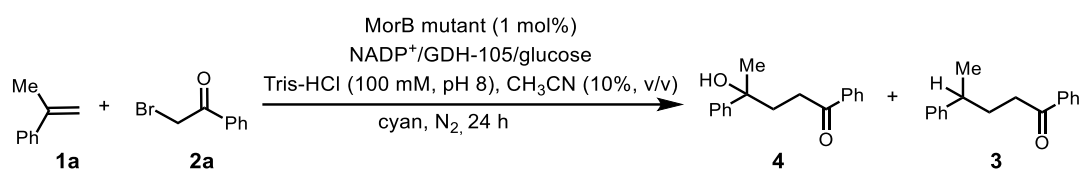

| Entry | MorB mutants | Yield of <b>4</b> (%) <sup>a</sup> | er <sup>b</sup> | Yield of <b>3</b> (%) <sup>a</sup> |
|-------|--------------|------------------------------------|-----------------|------------------------------------|
| 1     | Y72C         | 66                                 | 79:21           | 9                                  |
| 2     | Y72C/C191G   | 74                                 | 80:20           | 6                                  |
| 3     | Y72C/C191D   | 70                                 | 80:20           | 6                                  |
| 4     | Y72C/F246L   | 66                                 | 78:22           | 7                                  |
| 5     | Y72C/N307D   | 70                                 | 80:20           | 14                                 |

Reaction condition is described in Supplementary Table 4.

### Site saturation mutagenesis **Round 3**

**Supplementary Table 7.** Templates and target sites of the 3rd round of SSM on MorB for carbohydroxylation.

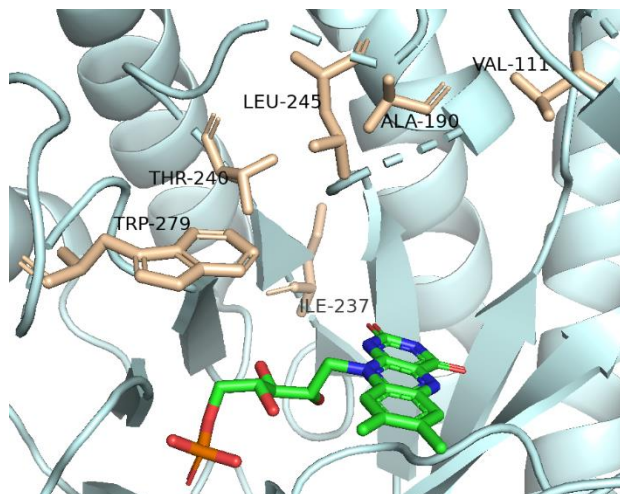

| Template   | Target sites                       | Beneficial mutations                                                         |
|------------|------------------------------------|------------------------------------------------------------------------------|
| Y72C/C191G | A190, V111, T240, W279, L245, I237 | Y72C/C191G/T240E<br>Y72C/C191G/T240Q<br>Y72C/C191G/V111T<br>Y72C/C191G/V111G |

**Supplementary Table 8.** Summary of the 3rd round of SSM on MorB for carbohydroxylation.

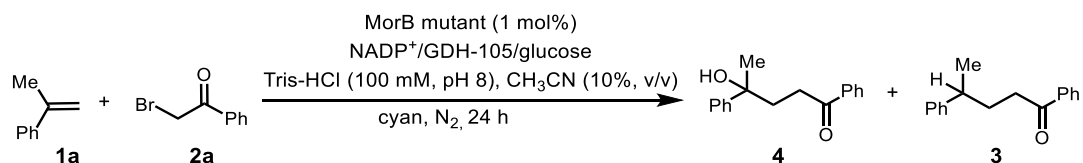

| Entry | MorB mutants     | Yield of <b>4</b> (%) <sup>a</sup> | er <sup>b</sup> | Yield of <b>3</b> (%) <sup>a</sup> |
|-------|------------------|------------------------------------|-----------------|------------------------------------|
| 1     | Y72C/C191G       | 74                                 | 80:20           | 6                                  |
| 2     | Y72C/C191G/T240E | 86                                 | 86:14           | 4                                  |
| 3     | Y72C/C191G/T240Q | 81                                 | 80:20           | 5                                  |
| 4     | Y72C/C191G/V111T | 86                                 | 83:17           | 6                                  |
| 5     | Y72C/C191G/V111G | 90                                 | 79:21           | 8                                  |

Reaction condition is described in Supplementary Table 4.

### Site saturation mutagenesis **Round 4**

**Supplementary Table 9.** Templates and target sites of the 4th round of SSM on MorB for hydroxylation.

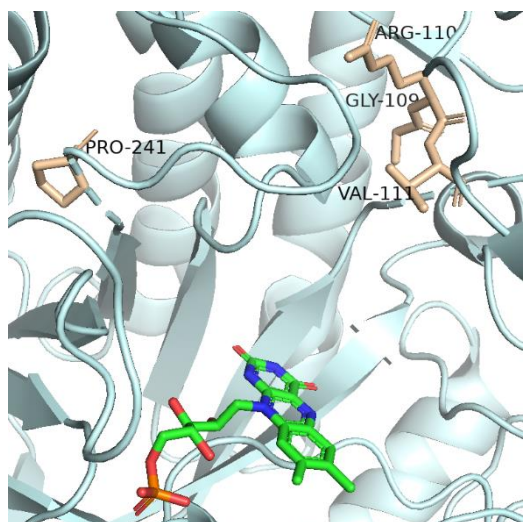

| Template         | Target sites           | Beneficial mutations                                                      |
|------------------|------------------------|---------------------------------------------------------------------------|
| Y72C/C191G/T240E | G109, R110, R111, P241 | Y72C/C191G/T240E/R110L<br>72C/C191G/T240E/R110Q<br>Y72C/C191G/T240E/P241M |

**Supplementary Table 10.** Summary of the 4th round of SSM on MorB for carbohydroxylation.

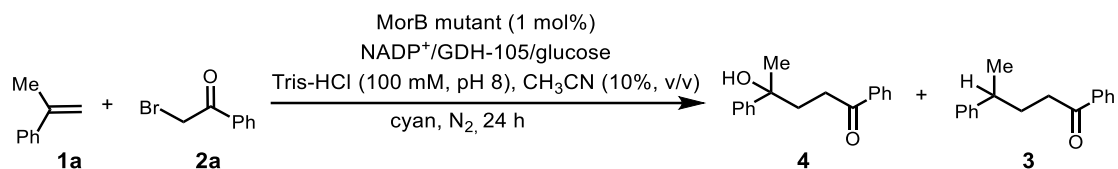

| Entry | MorB mutants           | Yield of 4 (%) <sup>a</sup> | er <sup>b</sup> | Yield of 3 (%) <sup>a</sup> |
|-------|------------------------|-----------------------------|-----------------|-----------------------------|
| 1     | Y72C/C191G/T240E       | 80                          | 85:15           | 4                           |
| 2     | Y72C/C191G/T240E/R110C | 81                          | 87:13           | 3                           |
| 3     | Y72C/C191G/T240E/R110L | 83                          | 87:13           | 3                           |
| 4     | Y72C/C191G/T240E/R110Q | 79                          | 87:13           | 3                           |
| 5     | Y72C/C191G/T240E/P241M | 72                          | 87:13           | 3                           |

Reaction condition is the same as described in Supplementary Table 4.

#### Site saturation mutagenesis **Round 5**

**Supplementary Table 11.** Templates and target sites of the 5th round of SSM on MorB for carbohydroxylation.

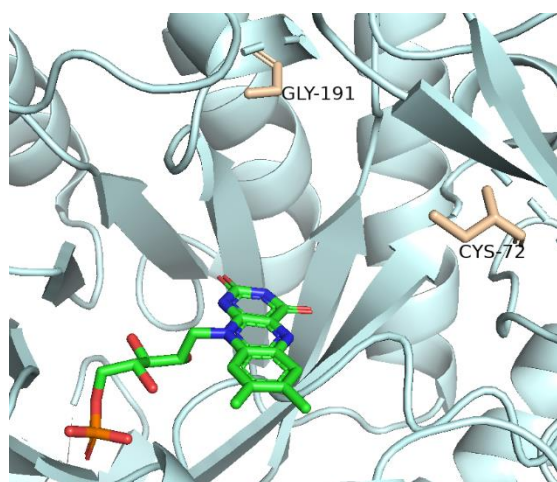

| Template               | Target sites | Beneficial mutations        |
|------------------------|--------------|-----------------------------|
| Y72C/C191G/T240E/R110L | C72          | Y72C/C191G/T240E/R110L/C72T |
|                        |              | Y72C/C191G/T240E/R110L/C72Q |
|                        |              | Y72C/C191G/T240E/R110L/C72E |

**Supplementary Table 12.** Summary of the 5th round of SSM on MorB for carbohydroxylation.

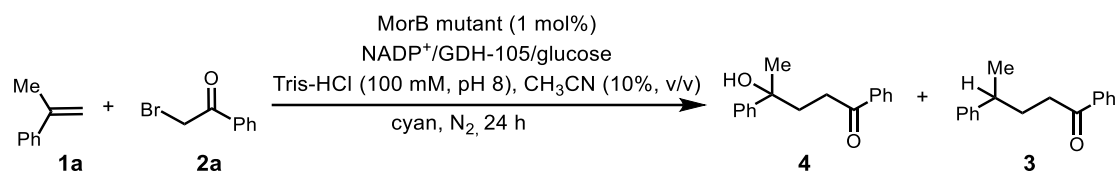

| Entry | MorB mutants                | Yield of <b>4</b> (%) <sup>a</sup> | er <sup>b</sup> | Yield of <b>3</b> (%) <sup>a</sup> |
|-------|-----------------------------|------------------------------------|-----------------|------------------------------------|
| 1     | Y72C/C191G/T240E/R110L      | 83                                 | 87:13           | 3                                  |
| 2     | Y72C/C191G/T240E/R110L/C72Q | 92                                 | 92:8            | 3                                  |
| 3     | Y72C/C191G/T240E/R110L/C72T | 94                                 | 92:8            | 3                                  |
| 4     | Y72C/C191G/T240E/R110L/C72E | 86                                 | 91:9            | 3                                  |

Reaction condition is the same as described in Supplementary Table 4.

#### Site saturation mutagenesis **Round 6**

**Supplementary Table 13.** Templates and target sites of the 6th round of SSM on MorB for carbohydroxylation.

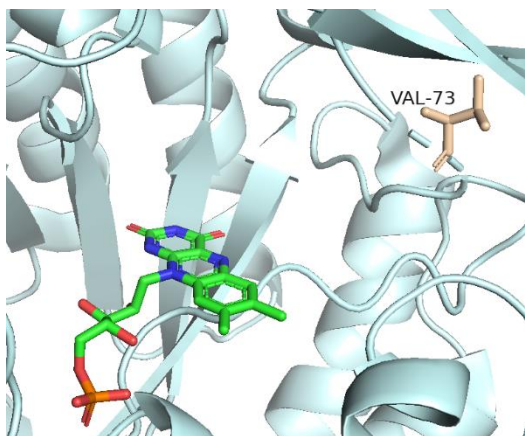

| Template                    | Target sites | Beneficial mutations             |
|-----------------------------|--------------|----------------------------------|
| Y72C/C191G/T240E/R110L/C72T | V73          | Y72C/C191G/T240E/R110L/C72T/V73D |
|                             |              | Y72C/C191G/T240E/R110L/C72T/V73S |

**Supplementary Table 14.** Summary of the 6th round of SSM on MorB for carbohydroxylation.

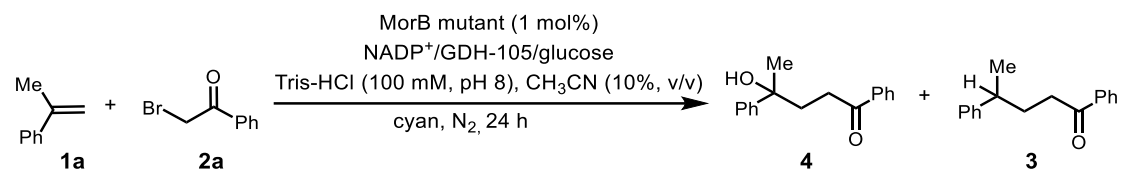

| Entry | MorB mutants                     | Yield of <b>4</b> (%) <sup>a</sup> | er <sup>b</sup> | Yield of <b>3</b> (%) <sup>a</sup> |
|-------|----------------------------------|------------------------------------|-----------------|------------------------------------|
| 1     | Y72C/C191G/T240E/R110L/C72T      | 94                                 | 92:8            | 3                                  |
| 2     | Y72C/C191G/T240E/R110L/C72T/V73D | 96                                 | 93:7            | 2                                  |
| 3     | Y72C/C191G/T240E/R110L/C72T/V73S | 92                                 | 92:8            | 3                                  |

Reaction condition is the same as described in Supplementary Table 4.

#### Site saturation mutagenesis **Round 7**

**Supplementary Table 15.** Templates and target sites of the 7th round of SSM on MorB for carbohydroxylation.

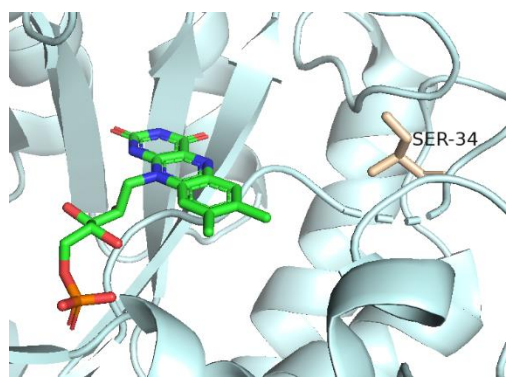

| Template                         | Target sites | Beneficial mutations                                                                   |
|----------------------------------|--------------|----------------------------------------------------------------------------------------|
| Y72C/C191G/T240E/R110L/C72T/V73D | S34          | Y72C/C191G/T240E/R110L/C72T/V73D/<br>S34Q<br>Y72C/C191G/T240E/R110L/C72T/V73D/<br>S34T |

**Supplementary Table 16.** Summary of the 7th round of SSM on MorB for carbohydroxylation.

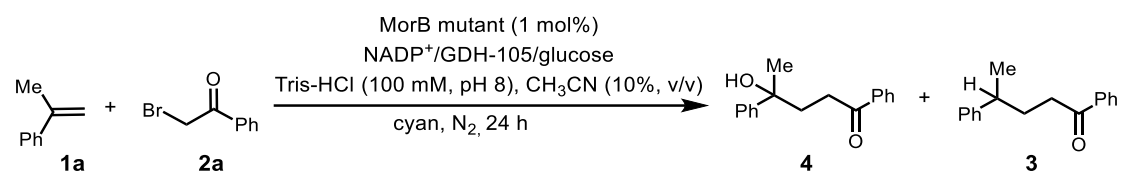

| Entry | MorB mutants                          | Yield of <b>4</b> (%) <sup>a</sup> | er <sup>b</sup> | Yield of <b>3</b> (%) <sup>a</sup> |
|-------|---------------------------------------|------------------------------------|-----------------|------------------------------------|
| 1     | Y72C/C191G/T240E/R110L/C72T/V73D/     | 96                                 | 93:7            | 2                                  |
| 2     | Y72C/C191G/T240E/R110L/C72T/V73D/S34Q | 96                                 | 95:5            | trace                              |
| 3     | Y72C/C191G/T240E/R110L/C72T/V73D/S34T | 94                                 | 95:5            | trace                              |

Reaction condition is the same as described in Supplementary Table 4.

**Supplementary Table 17.** Summary of the site saturation mutagenesis results.



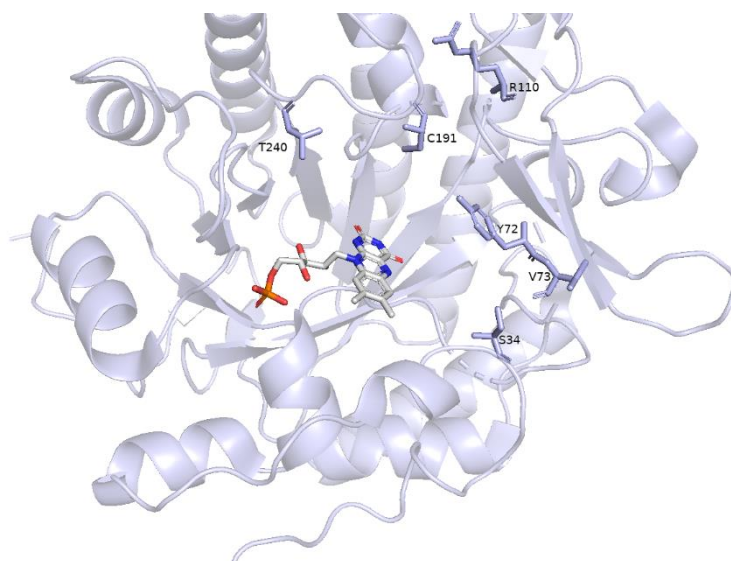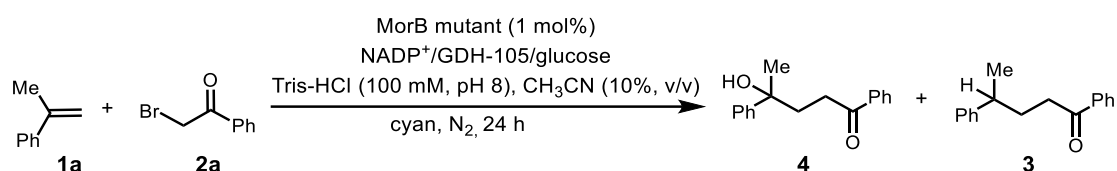

| Entry | MorB mutants                                        | Yield <sup>a</sup> of <b>4</b> | er <sup>b</sup> | Yield <sup>a</sup> of <b>3</b> |
|-------|-----------------------------------------------------|--------------------------------|-----------------|--------------------------------|
| 1     | WT                                                  | 45%                            | 75:25           | 10%                            |
| 2     | Y72C                                                | 66%                            | 79:21           | 9%                             |
| 3     | Y72C/C191G                                          | 74%                            | 80:20           | 6%                             |
| 4     | Y72C/C191G/T240E                                    | 80%                            | 85:15           | 4%                             |
| 5     | Y72C/C191G/T240E/R110L                              | 83%                            | 87:13           | 3%                             |
| 6     | Y72C/C191G/T240E/R110L/C72T                         | 94%                            | 92:8            | 3%                             |
| 7     | Y72C/C191G/T240E/R110L/C72T/V73                     | 96%                            | 93:7            | 2%                             |
| D     |                                                     |                                |                 |                                |
| 8     | Y72C/C191G/T240E/R110L/C72T/V73<br>D/S34Q (MorB-B3) | 96%                            | 95:5            | trace                          |

Reaction conditions:  $\alpha$ -methylstyrene (0.65  $\mu$ L, 0.005 mmol, 1.0 eq),  $\alpha$ -bromoketone (2.98 mg, 0.015 mmol, 3.0 eq), GDH-105 (0.06 mg), NADP<sup>+</sup> (0.2 mg), glucose (0.9 mg) and purified 'ene'-reductases (1 mol% based on  $\alpha$ -methylstyrene) in 100 mM Tris-HCl buffer pH 8.0, with 10% CH<sub>3</sub>CN (v/v) as cosolvent, final total volume is 600  $\mu$ L. Reaction mixtures were stirred under anaerobic conditions and irradiated with cyan LED at room temperature for 24 h. <sup>a</sup> Yield determined via LCMS relative to an internal standard (TBB). <sup>b</sup> Enantiomeric ratio (er) determined by HPLC on a chiral stationary phase.



## MorB-B3 catalyzed asymmetric carbohydroxylation reaction

### General procedure for enzymatic reaction

#### General procedure I for enzymatic reaction

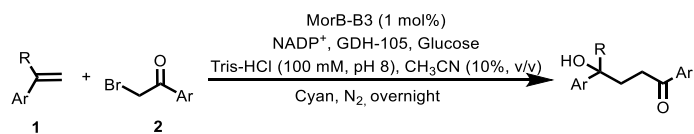

In the Coy® chamber (Vinyl Anaerobic Chamber, Type A), to a 1.5 mL GC vial was charged with GDH-105 (24  $\mu$ L, 5 mg/mL stock solution in 100 mM Tris-HCl buffer pH 8.0, 10 wt%), glucose (18  $\mu$ L, 100 mg/mL stock solution, 1 eq), NADP<sup>+</sup> (26.7  $\mu$ L, 15 mg/mL stock solution, 10 mol%), MorB-B3 (1.0 mol%) and substrates (**1**, 0.01 mmol; **2**, 0.03 mmol). Buffer (100 mM Tris-HCl buffer pH 8.0) was added to bring the total volume to 660  $\mu$ L with 10% CH<sub>3</sub>CN (v/v) as cosolvent. The vial was sealed with a screw cap and shaken under cyan light irradiation and anaerobic conditions at room temperature for 24 h. Upon completion, the reaction was quenched with 1.5 mL of acetonitrile and 100  $\mu$ L of 2 mg/mL 1,3,5-tribromobenzene (TBB) in acetonitrile as the internal standard. The mixture was shaken for 30 min, centrifuged (12000 x g, 5 mins), and the supernatant was filtered and retained for LCMS analysis for yield calculation. After LCMS analysis, the supernatant was concentrated under reduced pressure, extracted with EtOAc, the combined organic layers were dried over Na<sub>2</sub>SO<sub>4</sub>, filtered, and concentrated under reduced pressure. The resulting crude residue was dissolved in 20% isopropanol/hexanes (v/v) for chiral HPLC analysis.

#### General Procedure II for 1 mmol preparative scale reaction

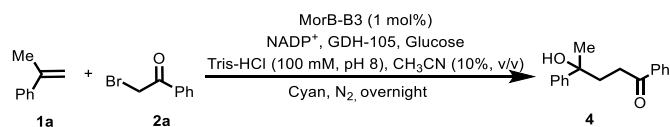

In the Coy® chamber (Vinyl Anaerobic Chamber, Type A), a 200 mL vial was charged with GDH-105 (12 mg), glucose (180 mg), NADP<sup>+</sup> (40 mg), Buffer (60 mL, 100 mM tris buffer pH 8.0) was added. MorB-B3 (1.0 mol%) was resuspended in the buffer. Substrates (**1a**, 130  $\mu$ L, 1.0 mmol, and **2a**, 594 mg in 6 mL CH<sub>3</sub>CN) were added to bring the total volume to 66 mL. The vial was sealed with a screw cap and stirred under anaerobic conditions with cyan light irradiation at room temperature for 48 h. Upon completion, the reaction was centrifuged at 4000 g, 15 min. The supernatant was combined and the cell pellet was washed with CH<sub>3</sub>CN. The combined solution was further quenched with 30 mL of acetonitrile. The mixture was stirred for 30 min, centrifuged (4000 g, 10 min), and the supernatant was concentrated, and extracted with EtOAc. The combined organic layers were dried over Na<sub>2</sub>SO<sub>4</sub>, filtered, and concentrated under reduced pressure to provide the crude product, which was purified by flash chromatography (EtOAc/Hexanes, 10%, v/v) to give the pure product as a yellow oil (139.7 mg, 55% yield).

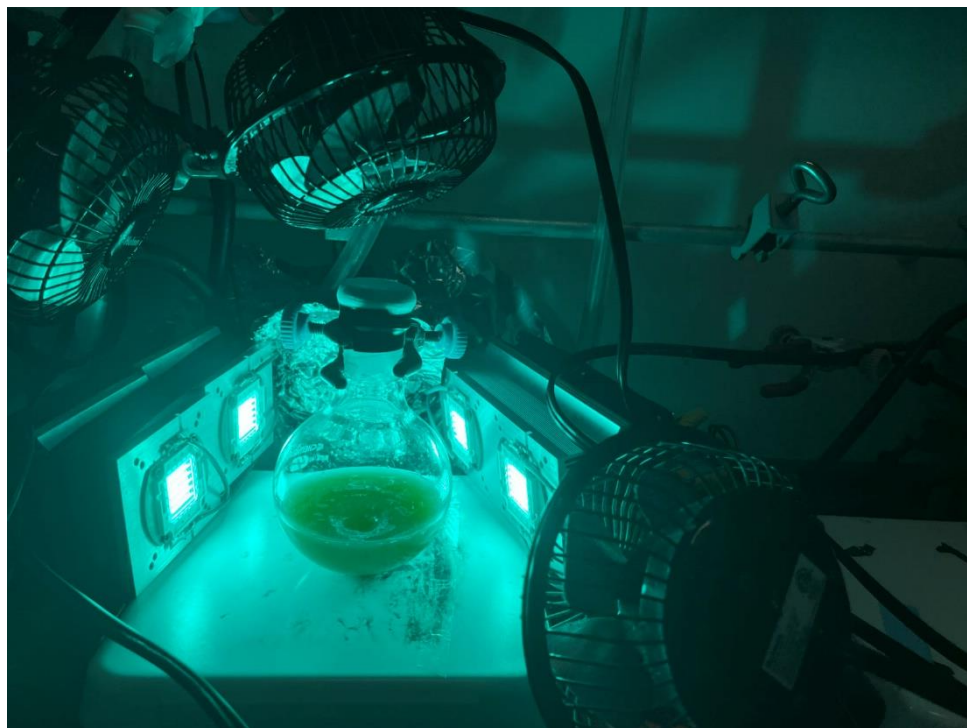

**Supplementary Figure 1.** Scale-up reaction set-up.

### Product derivatization

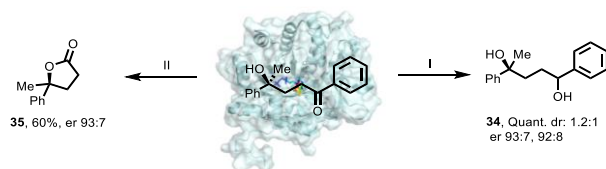

**Supplementary Figure 2.** Product derivatization.

### General procedure I for product derivatization

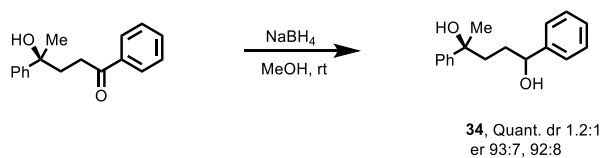

To a 1.5 mL GC vial equipped with a magnetic stir bar was charged with (*S*)-4-hydroxy-1,4-diphenylpentan-1-one (**4**, 17.0 mg, 0.067 mmol). MeOH (600  $\mu$ L) was added, followed by the addition of NaBH<sub>4</sub> (3 eq, 7.6 mg, 0.2 mmol). The reaction mixture was allowed to stir at room temperature overnight. Upon completion, water was added and extracted with DCM. The combined organic layers were washed with brine, dried over Na<sub>2</sub>SO<sub>4</sub>, filtered, and concentrated under reduced pressure to afford the target product **34** (colorless oil, quant.).

### General procedure II for product derivatization

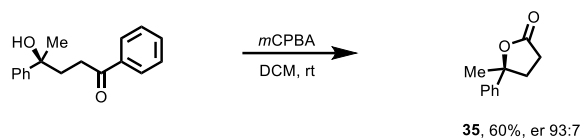

To a 1.5 mL GC vial equipped with a magnetic stir bar was charged with (*S*)-4-hydroxy-1,4-diphenylpentan-1-one (**4**, 25.4 mg, 0.1 mmol). CH<sub>2</sub>Cl<sub>2</sub> (500  $\mu$ L) was added, followed by the addition of *m*CPBA (3 eq, 51.6mg, 0.3 mmol). The reaction mixture was allowed to stir at room temperature for 24 h. Upon completion, water was added and extracted with DCM. The combined organic layers were washed with sat. Na<sub>2</sub>SO<sub>3</sub> and brine, dried over Na<sub>2</sub>SO<sub>4</sub>, filtered, and concentrated under reduced pressure. Further purified with preparative TLC afford the target product **35** (colorless oil, 60%).

### Substrates with cyclization coproducts.

For those unactivated alkenes, the cyclohexanone coproduct was observed as shown below. Control experiment showed that the cyclohexanone coproduct couldn't be formed through hydroxylation product. We reasoned the radical intermediate underwent the radical addition to the arene, after aromatization to give the product.

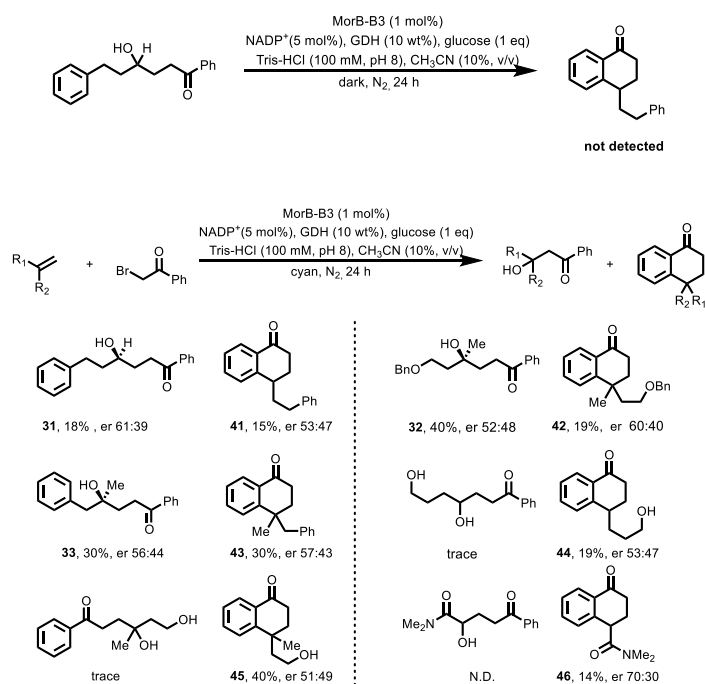

**Supplementary Figure 3.** Substrates with cyclization coproducts.

## Substrates limitations

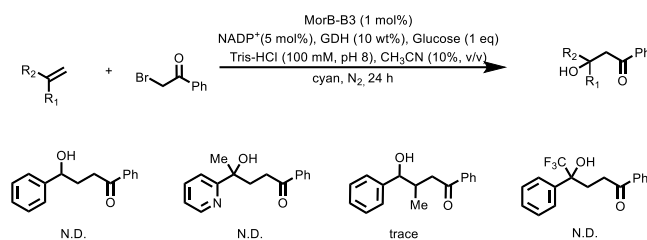

Supplementary Figure 4. Substrates limitations.

## General procedures for the preparation of alkenes

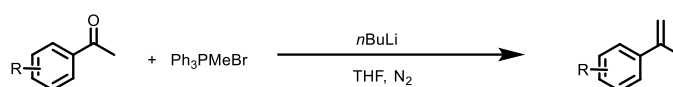

Substrates **1b-1k**, **36**, and **38** were prepared according to literatures<sup>8-16</sup>. Other substrates were commercially available and used without any purification.

Methyltriphenylphosphonium bromide (1.5 mmol) in dry THF (10 mL) under N<sub>2</sub> atmosphere was cooled to 0 °C. Then, *n*-BuLi (2.5 M solution in hexane, 1.5 mmol) was added slowly to the solution. After, the resulting orange mixture was maintained at 0 °C for 0.5-1 h, a solution of the corresponding ketone (1.0 mmol) in dry THF was added dropwise at 0 °C. The reaction was allowed to warm up to rt, stirred overnight (monitored by TLC), and finally quenched sat. NH<sub>4</sub>Cl. The resulting mixture was extracted with DCM. The combined organic phase was washed with brine, dried over Na<sub>2</sub>SO<sub>4</sub>, and concentrated under reduced pressure. The resulting crude product was purified by flash column chromatography to give the corresponding alkenes.

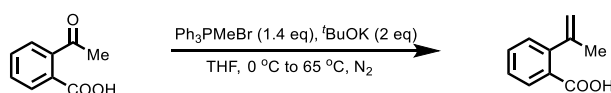

Methyltriphenylphosphonium bromide (1.4 mmol) in dry THF (10 mL) under N<sub>2</sub> atmosphere was cooled to 0 °C. Then, *t*BuOK (2 mmol) was added slowly to the solution. After, the resulting orange mixture was maintained at 0 °C for 0.5-1 h, a solution of the corresponding ketone (1.0 mmol) in dry THF was added dropwise at 0 °C. The reaction was stirred overnight at 65 °C, and finally quenched with sat. NH<sub>4</sub>Cl. The resulting mixture was extracted with DCM. The combined organic phase was washed with brine, dried over Na<sub>2</sub>SO<sub>4</sub>, and concentrated under reduced pressure. The resulting crude product was purified by flash column chromatography to give the corresponding alkene.

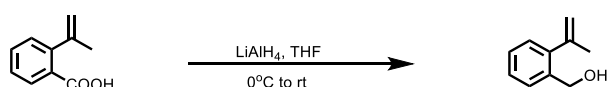

2-(Prop-1-en-2-yl)benzoic acid (0.5 mmol) dissolved in dry THF was cooled to 0 °C. Then, LiAlH<sub>4</sub> (1

mmol) was added slowly to the solution. The solution was allowed to stir at rt for 2 h. The reaction was quenched by 10% NaOH solution and extracted with DCM. The combined organic phase was washed with brine, dried over Na<sub>2</sub>SO<sub>4</sub>, and concentrated under reduced pressure. The resulting crude product was purified by flash column chromatography to give the corresponding alcohol.

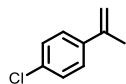

**1-chloro-4-(prop-1-en-2-yl)benzene (1b)**

**<sup>1</sup>H NMR** (500 MHz, CDCl<sub>3</sub>) δ 7.44 – 7.40 (m, 2H), 7.34 – 7.30 (m, 2H), 5.38 (t, *J* = 1.1 Hz, 1H), 5.12 (p, *J* = 1.5 Hz, 1H), 2.17 – 2.14 (m, 3H).

**<sup>13</sup>C NMR** (126 MHz, CDCl<sub>3</sub>) δ 142.2, 139.7, 133.2, 128.3, 126.8, 113.0, 21.8.

The NMR spectra is in agreement with published data<sup>8</sup>.

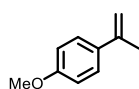

**1-methoxy-4-(prop-1-en-2-yl)benzene (1c)**

**<sup>1</sup>H NMR** (500 MHz, CDCl<sub>3</sub>) δ 7.42 (d, *J* = 8.8 Hz, 2H), 6.87 (d, *J* = 8.8 Hz, 2H), 5.29 (s, 1H), 4.99 (s, 1H), 3.82 (s, 3H), 2.13 (s, 3H).

**<sup>13</sup>C NMR** (126 MHz, CDCl<sub>3</sub>) δ 159.1, 142.6, 133.7, 126.6, 113.5, 110.7, 55.3, 21.9.

The NMR spectra is in agreement with published data<sup>8</sup>.

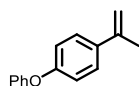

**1-phenoxy-4-(prop-1-en-2-yl)benzene (1d)**

**<sup>1</sup>H NMR** (500 MHz, CDCl<sub>3</sub>) δ 7.40 – 7.34 (m, 2H), 7.31 – 7.23 (m, 2H), 7.07 – 7.00 (m, 1H), 6.96 – 6.92 (m, 2H), 6.92 – 6.86 (m, 2H), 5.25 (dd, *J* = 1.5, 0.8 Hz, 1H), 4.97 (p, *J* = 1.5 Hz, 1H), 2.07 (s, 3H).

**<sup>13</sup>C NMR** (126 MHz, CDCl<sub>3</sub>) δ 157.2, 156.7, 142.5, 136.3, 129.8, 126.9, 123.3, 118.9, 118.5, 111.7, 21.9.

The NMR spectra is in agreement with published data<sup>9</sup>.

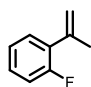

**1-fluoro-2-(prop-1-en-2-yl)benzene (1e)**

**<sup>1</sup>H NMR** (500 MHz, CDCl<sub>3</sub>) δ 7.30 (t, *J* = 7.7 Hz, 1H), 7.28 – 7.19 (m, 1H), 7.10 (t, *J* = 7.5 Hz, 1H), 7.04 (dd, *J* = 11.1, 8.3 Hz, 1H), 5.24 (s, 2H), 2.15 (s, 3H).

**<sup>13</sup>C NMR** (126 MHz, CDCl<sub>3</sub>) δ 160.0 (d, *J* = 248.2 Hz), 140.2, 130.3 (d, *J* = 13.5 Hz), 129.4 (d, *J* = 4.4 Hz), 128.7 (d, *J* = 8.4 Hz), 123.9, 116.6 (d, *J* = 4.0 Hz), 115.8 (d, *J* = 23.0 Hz), 23.1 (d, *J* = 3.5 Hz).

**<sup>19</sup>F NMR** (470 MHz, CDCl<sub>3</sub>) δ -114.54 (s).

The NMR spectra is in agreement with published data<sup>10</sup>.

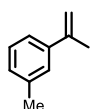

### 1-methyl-3-(prop-1-en-2-yl)benzene (1f)

$^1\text{H NMR}$  (500 MHz,  $\text{CDCl}_3$ )  $\delta$  7.44 – 7.20 (m, 3H), 7.12 (d,  $J = 7.4$  Hz, 1H), 5.38 (d,  $J = 1.9$  Hz, 1H), 5.10 (p,  $J = 1.5$  Hz, 1H), 2.40 (s, 3H), 2.18 (s, 3H).

$^{13}\text{C NMR}$  (126 MHz,  $\text{CDCl}_3$ )  $\delta$  143.4, 141.3, 137.7, 128.2, 128.1, 126.3, 122.6, 112.3, 21.9, 21.5.

The NMR spectra is in agreement with published data<sup>10</sup>.

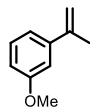

### 1-methoxy-3-(prop-1-en-2-yl)benzene (1g)

$^1\text{H NMR}$  (500 MHz,  $\text{CDCl}_3$ )  $\delta$  7.28 (dd,  $J = 9.7, 6.2$  Hz, 1H), 7.09 (d,  $J = 7.7$  Hz, 1H), 7.05 – 6.96 (m, 1H), 6.85 (dd,  $J = 8.2, 2.0$  Hz, 1H), 5.39 (s, 1H), 5.11 (s, 1H), 3.85 (s, 3H), 2.17 (s, 3H).

$^{13}\text{C NMR}$  (126 MHz,  $\text{CDCl}_3$ )  $\delta$  159.5, 143.2, 142.8, 129.2, 118.1, 112.7, 112.6, 111.5, 55.2, 21.9.

The NMR spectra is in agreement with published data<sup>10</sup>.

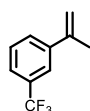

### 1-(prop-1-en-2-yl)-3-(trifluoromethyl)benzene (1h)

$^1\text{H NMR}$  (500 MHz,  $\text{CDCl}_3$ )  $\delta$  7.70 (s, 1H), 7.64 (d,  $J = 7.8$  Hz, 1H), 7.52 (d,  $J = 7.7$  Hz, 1H), 7.45 (t,  $J = 7.8$  Hz, 1H), 5.43 (s, 1H), 5.18 (s, 1H), 2.18 (s, 3H).

$^{13}\text{C NMR}$  (126 MHz,  $\text{CDCl}_3$ )  $\delta$  142.1, 142.0, 130.6 (q,  $J = 32.0$  Hz), 128.7 (q,  $J = 1.1$  Hz), 128.7, 124.2 (q,  $J = 272.3$  Hz), 124.0 (q,  $J = 3.8$  Hz), 122.3 (q,  $J = 3.8$  Hz), 114.0, 21.7.

$^{19}\text{F NMR}$  (470 MHz,  $\text{CDCl}_3$ )  $\delta$  -62.65 (s, 3F)

The NMR spectra is in agreement with published data<sup>11</sup>.

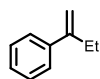

### but-1-en-2-ylbenzene (1i)

$^1\text{H NMR}$  (500 MHz,  $\text{CDCl}_3$ )  $\delta$  7.42 (d,  $J = 7.6$  Hz, 2H), 7.33 (t,  $J = 7.5$  Hz, 2H), 7.30 – 7.22 (m, 1H), 5.28 (s, 1H), 5.06 (d,  $J = 1.2$  Hz, 1H), 2.52 (q,  $J = 7.4$  Hz, 2H), 1.11 (t,  $J = 7.4$  Hz, 3H).

$^{13}\text{C NMR}$  (126 MHz,  $\text{CDCl}_3$ )  $\delta$  150.1, 141.5, 128.2, 127.3, 126.0, 110.9, 28.1, 13.0.

The NMR spectra is in agreement with published data<sup>12</sup>.

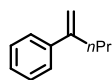

### pent-1-en-2-ylbenzene (1j)

$^1\text{H NMR}$  (500 MHz,  $\text{CDCl}_3$ )  $\delta$  7.46 – 7.41 (m, 2H), 7.38 – 7.32 (m, 2H), 7.32 – 7.27 (m, 1H), 5.30 (d,  $J = 1.7$  Hz, 1H), 5.08 (q,  $J = 1.5$  Hz, 1H), 2.54 – 2.48 (m, 2H), 1.51 (h,  $J = 7.4$  Hz, 2H), 0.95 (t,  $J = 7.3$  Hz, 3H).

$^{13}\text{C NMR}$  (126 MHz,  $\text{CDCl}_3$ )  $\delta$  148.5, 141.5, 128.2, 127.2, 126.2, 112.2, 37.5, 21.4, 13.8.

The NMR spectra is in agreement with published data<sup>12</sup>.

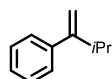

**(3-methylbut-1-en-2-yl)benzene (1k)**

<sup>1</sup>H NMR (500 MHz, CDCl<sub>3</sub>) δ 7.40 – 7.32 (m, 4H), 7.31 – 7.26 (m, 1H), 5.23 – 5.15 (m, 1H), 5.07 (t, *J* = 1.4 Hz, 1H), 2.87 (pd, *J* = 6.8, 1.4 Hz, 1H), 1.13 (s, 3H), 1.12 (s, 3H).

<sup>13</sup>C NMR (126 MHz, CDCl<sub>3</sub>) δ 155.8, 142.9, 128.1, 127.0, 126.6, 110.0, 32.3, 22.1.

The NMR spectra is in agreement with published data<sup>13</sup>.

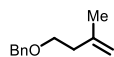**((3-methylbut-3-en-1-yl)oxy)methyl)benzene (1o)**

<sup>1</sup>H NMR (500 MHz, CDCl<sub>3</sub>) δ 7.34 (d, *J* = 4.4 Hz, 4H), 7.31 – 7.27 (m, 1H), 4.94 – 4.61 (m, 2H), 4.53 (s, 2H), 3.59 (t, *J* = 6.9 Hz, 2H), 2.68 – 2.06 (m, 2H), 1.92 – 1.61 (m, 3H).

<sup>13</sup>C NMR (126 MHz, CDCl<sub>3</sub>) δ 142.9, 138.5, 128.4, 127.7, 127.6, 111.5, 72.9, 68.7, 37.8, 22.7.

The NMR spectra is in agreement with published data<sup>14</sup>.

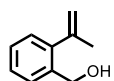**(2-(prop-1-en-2-yl)phenyl)methanol (36)**

<sup>1</sup>H NMR (500 MHz, CDCl<sub>3</sub>) δ 7.51 – 7.45 (m, 1H), 7.30 (ddt, *J* = 9.5, 5.5, 2.4 Hz, 2H), 7.23 – 7.17 (m, 1H), 5.28 – 5.24 (m, 1H), 4.93 (dd, *J* = 2.1, 1.1 Hz, 1H), 4.73 (s, 2H).

<sup>13</sup>C NMR (126 MHz, CDCl<sub>3</sub>) δ 144.8, 143.0, 137.3, 128.2, 128.1, 127.5, 127.3, 115.5, 63.3, 25.1.

The NMR spectra is in agreement with published data<sup>15</sup>.

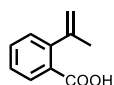**2-(prop-1-en-2-yl)benzoic acid (38)**

<sup>1</sup>H NMR (500 MHz, CDCl<sub>3</sub>) δ 7.98 (dd, *J* = 7.8, 1.4 Hz, 1H), 7.53 (td, *J* = 7.5, 1.4 Hz, 1H), 7.38 (td, *J* = 7.6, 1.3 Hz, 1H), 7.29 (d, *J* = 6.8 Hz, 1H), 5.16 (t, *J* = 1.7 Hz, 1H), 4.97 – 4.89 (m, 1H), 2.15 (s, 3H).

<sup>13</sup>C NMR (126 MHz, CDCl<sub>3</sub>) δ 171.9, 146.6, 146.2, 132.6, 130.7, 129.7, 127.9, 127.1, 114.0, 24.3.

The NMR spectra is in agreement with published data<sup>16</sup>.

**General procedure for the preparation of racemic compounds****General procedure I for the preparation of racemic compounds<sup>6</sup>**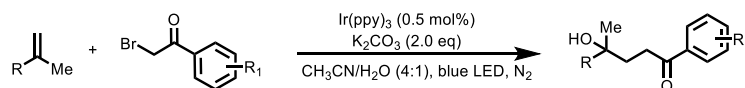

In the glovebox, to a 20 mL vial equipped with a magnetic stir bar was charged with Ir(ppy)<sub>3</sub> (0.5 mol%), K<sub>2</sub>CO<sub>3</sub> (2.0 eq), alkene (1.0 mmol, 1.0 eq.) and bromoacetophenone (1.0 eq.). Degassed CH<sub>3</sub>CN (3.2 mL) and water (0.8 mL) were added. The vial was placed under Kessil Blue LED (465 nm) overnight. Upon completion (monitored by LCMS), the mixtures were extracted with EtOAc and washed with brine. The combined organic layers were dried over Na<sub>2</sub>SO<sub>4</sub>, filtered, and concentrated under reduced pressure to provide the crude product, which was purified by flash chromatography.

The cyclization coproducts **41-46** were isolated as minor products under the same reaction conditions.

**Note:** Some of the hydroxylation products were unstable in the silicon column. If necessary, purification with reverse phase C18 column was applied.

### General procedure II for the preparation of racemic compounds<sup>7</sup>

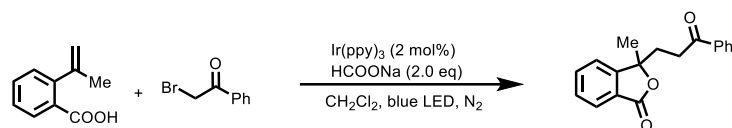

In a glovebox, to a 20 mL vial equipped with a magnetic stir bar was charged with Ir(ppy)<sub>3</sub> (2 mol%), HCOONa (2.0 eq), alkene (1.0 mmol, 1.0 eq.) and bromoacetophenone (1.0 eq.). Degassed DCM (2 mL) was added. The vial was placed under Kessil Blue LED (465 nm) overnight. Upon completion (monitored by LCMS), water was added and extracted with EtOAc. The combined organic layers were washed with brine, dried over Na<sub>2</sub>SO<sub>4</sub>, filtered, and concentrated under reduced pressure to provide the crude product, which was purified by flash chromatography.

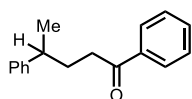

### 1,4-diphenylpentan-1-one (3)

Product standard was prepared according to the reported method<sup>5</sup>. Overall yield: 35%.

<sup>1</sup>H NMR (500 MHz, CDCl<sub>3</sub>) δ 7.87 (d, *J* = 7.0 Hz, 2H), 7.55 (t, *J* = 7.4 Hz, 1H), 7.44 (t, *J* = 7.8 Hz, 2H), 7.33 (t, *J* = 7.6 Hz, 2H), 7.26 – 7.18 (m, 3H), 3.03 – 2.74 (m, 3H), 2.10 (ddt, *J* = 15.0, 9.2, 6.0 Hz, 1H), 2.06 – 1.95 (m, 1H), 1.34 (d, *J* = 7.0 Hz, 3H).

The NMR spectra is in agreement with published data<sup>5</sup>.

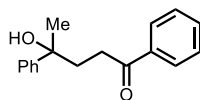

### 4-hydroxy-1,4-diphenylpentan-1-one (4)

Product standard was prepared according to the General procedure I for the preparation of racemic compounds. Overall yield: 55%.

<sup>1</sup>H NMR (500 MHz, CDCl<sub>3</sub>) δ 7.87 (d, *J* = 7.4 Hz, 2H), 7.53 (t, *J* = 7.4 Hz, 1H), 7.47 (d, *J* = 7.4 Hz, 2H), 7.41 (t, *J* = 7.7 Hz, 2H), 7.35 (t, *J* = 7.7 Hz, 2H), 7.24 (d, *J* = 7.3 Hz, 1H), 3.01 (dt, *J* = 17.7, 7.4 Hz, 1H), 2.88 (ddd, *J* = 17.7, 7.5, 6.3 Hz, 1H), 2.57 (s, 1H), 2.40 – 2.22 (m, 2H), 1.63 (s, 3H).

<sup>13</sup>C NMR (126 MHz, CDCl<sub>3</sub>) δ 201.2, 147.2, 136.8, 133.1, 128.5, 128.3, 128.1, 126.7, 124.8, 74.2, 37.7, 33.8, 31.4.

**HRMS** (DART-MS): *m/z* calcd for C<sub>17</sub>H<sub>17</sub>O [M-OH]<sup>+</sup>: 237.12739, found: 237.12624.

**IR** (neat, cm<sup>-1</sup>): 3492, 3059, 2971, 1716, 1598, 1447, 1273, 1068, 1025, 697.

The NMR spectra is in agreement with published data<sup>6</sup>.



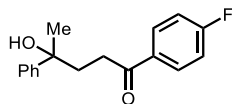

#### 1-(4-fluorophenyl)-4-hydroxy-4-phenylpentan-1-one (5)

Product standard was prepared according to the General procedure I for the preparation of racemic compounds. Overall yield: 25%.

**<sup>1</sup>H NMR** (500 MHz, CDCl<sub>3</sub>) δ 7.89 (dd, *J* = 8.6, 5.5 Hz, 2H), 7.46 (d, *J* = 7.5 Hz, 2H), 7.35 (t, *J* = 7.7 Hz, 2H), 7.25 (d, *J* = 6.3 Hz, 1H), 7.08 (t, *J* = 8.6 Hz, 2H), 3.01 – 2.95 (m, 1H), 2.85 – 2.79 (m, 1H), 2.43 (s, 1H), 2.36 – 2.19 (m, 2H), 1.63 (s, 3H).

**<sup>13</sup>C NMR** (126 MHz, CDCl<sub>3</sub>) δ 199.4, 165.73 (d, *J* = 254.7 Hz), 147.1, 133.2 (d, *J* = 3.0 Hz), 130.7 (d, *J* = 9.3 Hz), 128.3, 126.7, 124.8, 115.6 (d, *J* = 21.8 Hz), 74.1, 37.7, 33.6, 31.4.

**<sup>19</sup>F NMR** (470 MHz, CDCl<sub>3</sub>) δ -105.31 – -105.26 (m, 1F).

**HRMS** (DART-MS): *m/z* calcd for C<sub>17</sub>H<sub>16</sub>OF [M-OH]<sup>+</sup>: 255.11797, found: 255.11679.

**IR** (neat, cm<sup>-1</sup>): 3492, 2970, 1738, 1598, 1365, 1216, 1070, 1009, 699.

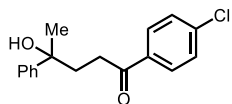

#### 1-(4-chlorophenyl)-4-hydroxy-4-phenylpentan-1-one (6)

Product standard was prepared according to the General procedure I for the preparation of racemic compounds. Overall yield: 17%.

**<sup>1</sup>H NMR** (500 MHz, CDCl<sub>3</sub>) δ 7.80 (d, *J* = 8.5 Hz, 2H), 7.45 (d, *J* = 7.3 Hz, 2H), 7.36 (dd, *J* = 17.1, 8.3 Hz, 4H), 7.25 (d, *J* = 7.3 Hz, 1H), 3.01 – 2.95 (m, 1H), 2.84 – 2.78 (m, 1H), 2.38 (s, 1H), 2.30 – 2.26 (m, 2H), 1.63 (s, 3H).

**<sup>13</sup>C NMR** (126 MHz, CDCl<sub>3</sub>) δ 199.8, 147.0, 139.5, 135.1, 129.5, 128.8, 128.3, 126.7, 124.8, 74.1, 37.7, 33.7, 31.4.

**HRMS** (DART-MS): *m/z* calcd for C<sub>17</sub>H<sub>16</sub>OCl [M-OH]<sup>+</sup>: 271.08842, found: 271.08708.

**IR** (neat, cm<sup>-1</sup>): 3444, 2970, 1723, 1676, 1588, 1399, 1090, 830, 696.

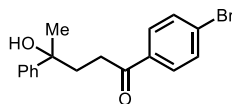

#### 1-(4-bromophenyl)-4-hydroxy-4-phenylpentan-1-one (7)

Product standard was prepared according to the General procedure I for the preparation of racemic compounds. Overall yield: 15%.

**<sup>1</sup>H NMR** (500 MHz, CDCl<sub>3</sub>) δ 7.72 (d, *J* = 8.5 Hz, 2H), 7.55 (d, *J* = 8.6 Hz, 2H), 7.45 (d, *J* = 7.3 Hz, 2H), 7.35 (t, *J* = 7.7 Hz, 2H), 7.24 (d, *J* = 7.3 Hz, 1H), 2.97 (ddd, *J* = 17.6, 7.9, 6.9 Hz, 1H), 2.80 (ddd, *J* = 17.7, 7.6, 6.4 Hz, 1H), 2.34 (s, 1H), 2.31 – 2.23 (m, 2H), 1.63 (s, 3H).

**<sup>13</sup>C NMR** (126 MHz, CDCl<sub>3</sub>) δ 200, 147.0, 135.5, 131.8, 129.6, 128.3, 128.2, 126.7, 124.8, 74.2, 37.7, 33.7, 31.4.

**HRMS** (DART-MS): *m/z* calcd for C<sub>17</sub>H<sub>16</sub>OBr [M-OH]<sup>+</sup>: 315.03790, found: 315.03638.

**IR** (neat, cm<sup>-1</sup>): 3498, 3057, 2968, 1720, 1673, 1585, 1396, 1069, 1009, 696.

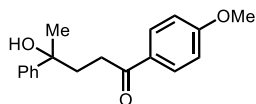

#### 4-hydroxy-1-(4-methoxyphenyl)-4-phenylpentan-1-one (8)

Product standard was prepared according to the General procedure I for the preparation of racemic compounds. Overall yield: 30%.

**<sup>1</sup>H NMR** (500 MHz, CDCl<sub>3</sub>) δ 7.86 (d, *J* = 8.9 Hz, 2H), 7.47 (d, *J* = 7.3 Hz, 2H), 7.35 (t, *J* = 7.7 Hz, 2H), 7.24 (t, *J* = 7.3 Hz, 1H), 6.88 (d, *J* = 8.8 Hz, 2H), 3.85 (s, 3H), 2.96 – 2.82 (m, 2H), 2.76 (s, 1H), 2.33 – 2.23 (m, 2H), 1.62 (s, 3H).

**<sup>13</sup>C NMR** (126 MHz, CDCl<sub>3</sub>) δ 199.8, 163.5, 147.3, 130.4, 129.8, 128.3, 126.6, 124.9, 113.6, 74.1, 55.5, 37.8, 33.4, 31.4.

**HRMS** (DART-MS): *m/z* calcd for C<sub>18</sub>H<sub>19</sub>O<sub>2</sub> [M-OH]<sup>+</sup>: 267.13796, found: 267.13662.

**IR** (neat, cm<sup>-1</sup>): 3443, 2969, 2932, 1715, 1666, 1597, 1445, 1254, 1167, 699.

The NMR spectra is in agreement with published data<sup>17</sup>.

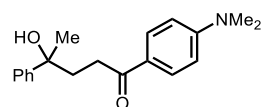

#### 1-(4-(dimethylamino)phenyl)-4-hydroxy-4-phenylpentan-1-one (9)

Product standard was prepared according to the General procedure I for the preparation of racemic compounds. Overall yield: 17%.

**<sup>1</sup>H NMR** (500 MHz, CDCl<sub>3</sub>) δ 7.80 (d, *J* = 8.9 Hz, 2H), 7.47 (d, *J* = 7.5 Hz, 2H), 7.34 (t, *J* = 7.7 Hz, 2H), 7.22 (t, *J* = 7.3 Hz, 1H), 6.60 (d, *J* = 9.0 Hz, 2H), 3.40 (s, 1H), 3.04 (s, 6H), 2.95 – 2.73 (m, 2H), 2.27 (dtd, *J* = 21.2, 14.4, 6.8 Hz, 2H), 1.61 (s, 3H).

**<sup>13</sup>C NMR** (126 MHz, CDCl<sub>3</sub>) δ 199.6, 153.5, 147.7, 130.4, 128.2, 126.4, 125.0, 124.6, 110.6, 74.1, 40.0, 38.1, 33.0, 31.4.

**HRMS** (DART-MS): *m/z* calcd for C<sub>19</sub>H<sub>22</sub>NO [M-OH]<sup>+</sup>: 280.16959, found: 280.16835.

**IR** (neat, cm<sup>-1</sup>): 3456, 2922, 1711, 1590, 1365, 1167, 1065, 818, 700.

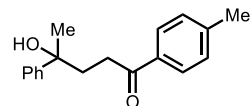

#### 4-hydroxy-4-phenyl-1-(p-tolyl)pentan-1-one (10)

Product standard was prepared according to the General procedure I for the preparation of racemic compounds. Overall yield: 45%.

**<sup>1</sup>H NMR** (500 MHz, CDCl<sub>3</sub>) δ 7.77 (d, *J* = 8.1 Hz, 2H), 7.46 (d, *J* = 7.4 Hz, 2H), 7.35 (t, *J* = 7.7 Hz, 2H), 7.25 – 7.16 (m, 3H), 2.96 (dt, *J* = 17.6, 7.4 Hz, 1H), 2.94 – 2.79 (m, 1H), 2.67 (s, 1H), 2.38 (s, 3H), 2.35 – 2.20 (m, 2H), 1.62 (s, 3H).

**<sup>13</sup>C NMR** (126 MHz, CDCl<sub>3</sub>) δ 200.9, 147.3, 143.9, 134.3, 129.2, 128.3, 128.2, 126.6, 124.9, 74.2, 37.8, 33.7, 31.4, 21.6.

**HRMS** (DART-MS): *m/z* calcd for C<sub>18</sub>H<sub>19</sub>O [M-OH]<sup>+</sup>: 251.14304, found: 251.14190.

**IR** (neat, cm<sup>-1</sup>): 3456, 2970, 1737, 1675, 1606, 1365, 1104, 754, 698.

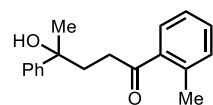

#### 4-hydroxy-4-phenyl-1-(o-tolyl)pentan-1-one (11)

Product standard was prepared according to the General procedure I for the preparation of racemic compounds. Overall yield: 33%.

**<sup>1</sup>H NMR** (500 MHz, CD<sub>3</sub>CN) δ 7.52 (d, *J* = 7.9 Hz, 1H), 7.48 (d, *J* = 7.0 Hz, 2H), 7.40 – 7.34 (m, 3H), 7.25 (td, *J* = 7.7, 2.5 Hz, 3H), 2.92 (ddd, *J* = 17.1, 8.9, 6.6 Hz, 1H), 2.66 (ddd, *J* = 17.2, 8.9, 6.1 Hz, 1H), 2.38 (s, 3H), 2.17 – 2.10 (m, 2H), 1.54 (s, 3H).

**<sup>13</sup>C NMR** (126 MHz, CD<sub>3</sub>CN) δ 204.9, 148.2, 138.7, 137.1, 131.5, 130.9, 128.1, 128.0, 126.3, 125.7, 124.9, 73.3, 38.1, 36.8, 30.1, 20.0.

**HRMS** (DART-MS): *m/z* calcd for C<sub>18</sub>H<sub>19</sub>O [M-OH]<sup>+</sup>: 251.14304, found: 251.14179.

**IR** (neat, cm<sup>-1</sup>): 3454, 2970, 1738, 1675, 1445, 1370, 1216, 1068, 749.

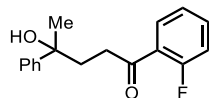

#### 1-(2-fluorophenyl)-4-hydroxy-4-phenylpentan-1-one (12)

Product standard was prepared according to the General procedure I for the preparation of racemic compounds. Overall yield: 20%.

**<sup>1</sup>H NMR** (500 MHz, CDCl<sub>3</sub>) δ 7.79 (td, *J* = 7.7, 1.5 Hz, 1H), 7.46 (d, *J* = 7.3 Hz, 3H), 7.34 (t, *J* = 7.7 Hz, 2H), 7.26 – 7.15 (m, 2H), 7.08 (dd, *J* = 10.7, 8.8 Hz, 1H), 3.08 – 2.97 (m, 1H), 2.96 – 2.84 (m, 1H), 2.40 (s, 1H), 2.28 (dd, *J* = 13.6, 6.3 Hz, 2H), 1.62 (s, 3H).

**<sup>13</sup>C NMR** (126 MHz, CDCl<sub>3</sub>) δ 199.5 (d, *J* = 4.2 Hz), 161.8 (d, *J* = 254.9 Hz), 147.3, 134.5 (d, *J* = 9.0 Hz), 130.6 (d, *J* = 2.6 Hz), 128.3, 126.7, 124.8, 124.4, 124.3, 116.7 (d, *J* = 23.8 Hz), 74.1, 38.7 (d, *J* = 7.5 Hz), 37.6 (d, *J* = 1.6 Hz), 31.0.

**<sup>19</sup>F NMR** (470 MHz, CD<sub>3</sub>CN) δ -112.02 – -112.97 (m, 1F).

**HRMS** (DART-MS): *m/z* calcd for C<sub>17</sub>H<sub>16</sub>OF [M-OH]<sup>+</sup>: 255.11797, found: 255.11673.

**IR** (neat, cm<sup>-1</sup>): 3456, 2970, 1737, 1680, 1608, 1450, 1212, 1026, 756.

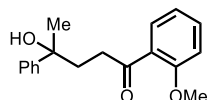

#### 4-hydroxy-1-(2-methoxyphenyl)-4-phenylpentan-1-one (13)

Product standard was prepared according to the General procedure I for the preparation of racemic compounds. Overall yield: 32%.

**<sup>1</sup>H NMR** (500 MHz, CDCl<sub>3</sub>) δ 7.61 (dd, *J* = 7.7, 1.5 Hz, 1H), 7.49 – 7.45 (m, 2H), 7.45 – 7.39 (m, 1H), 7.34 (t, *J* = 7.7 Hz, 2H), 7.23 (t, *J* = 7.3 Hz, 1H), 6.96 (t, *J* = 7.5 Hz, 1H), 6.91 (d, *J* = 8.4 Hz, 1H), 3.79 (s, 3H), 2.95 (td, *J* = 7.2, 4.5 Hz, 2H), 2.76 (s, 1H), 2.25 (qd, *J* = 14.4, 7.1 Hz, 2H), 1.60 (s, 3H).

**<sup>13</sup>C NMR** (126 MHz, CDCl<sub>3</sub>) δ 203.8, 158.4, 147.7, 133.4, 130.2, 128.3, 128.1, 126.5, 124.9, 120.6, 111.5, 74.2, 55.4, 39.0, 38.1, 31.0.

**HRMS** (DART-MS): *m/z* calcd for C<sub>18</sub>H<sub>19</sub>O<sub>2</sub> [M-OH]<sup>+</sup>: 267.13796, found: 267.13678.

**IR** (neat, cm<sup>-1</sup>): 3443, 2970, 1737, 1667, 1597, 1370, 1241, 1021, 753.

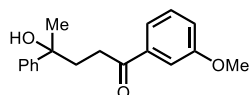

#### 4-hydroxy-1-(3-methoxyphenyl)-4-phenylpentan-1-one (14)

Product standard was prepared according to the General procedure I for the preparation of racemic compounds. Overall yield: 15%.

**<sup>1</sup>H NMR** (500 MHz, CDCl<sub>3</sub>) δ 7.46 (d, *J* = 7.4 Hz, 2H), 7.42 (d, *J* = 8.8 Hz, 2H), 7.35 (dd, *J* = 13.1, 5.2

Hz, 2H), 7.31 (d,  $J = 7.8$  Hz, 1H), 7.24 (t,  $J = 7.3$  Hz, 1H), 7.08 (dd,  $J = 8.2, 1.9$  Hz, 1H), 3.83 (s, 3H), 2.99 (ddd,  $J = 17.6, 7.8, 7.0$  Hz, 1H), 2.86 (ddd,  $J = 17.7, 7.5, 6.3$  Hz, 1H), 2.51 (s, 1H), 2.35 – 2.20 (m, 2H), 1.63 (s, 3H).

$^{13}\text{C}$  NMR (126 MHz,  $\text{CDCl}_3$ )  $\delta$  201.0, 159.8, 147.2, 138.1, 129.5, 128.3, 126.7, 124.8, 120.8, 119.6, 112.4, 74.2, 55.4, 37.8, 33.9, 31.3.

HRMS (DART-MS):  $m/z$  calcd for  $\text{C}_{18}\text{H}_{19}\text{O}_2$   $[\text{M}-\text{OH}]^+$ : 267.13796, found: 267.13670.

IR (neat,  $\text{cm}^{-1}$ ): 3464, 2969, 1722, 1676, 1582, 1252, 1028, 867, 762.

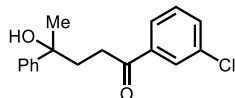

#### 1-(3-chlorophenyl)-4-hydroxy-4-phenylpentan-1-one (15)

Product standard was prepared according to the General procedure for the preparation of racemic compounds. Overall yield: 17%.

$^1\text{H}$  NMR (500 MHz,  $\text{CDCl}_3$ )  $\delta$  7.84 (s, 1H), 7.73 (d,  $J = 7.8$  Hz, 1H), 7.50 (dd,  $J = 8.0, 0.9$  Hz, 1H), 7.46 (d,  $J = 7.3$  Hz, 2H), 7.36 (td,  $J = 7.7, 2.6$  Hz, 3H), 7.28 – 7.24 (m, 1H), 3.02 – 2.96 (m, 1H), 2.81 (dt,  $J = 17.8, 6.9$  Hz, 1H), 2.30 – 2.27 (m, 3H), 1.63 (s, 3H).

$^{13}\text{C}$  NMR (126 MHz,  $\text{CDCl}_3$ )  $\delta$  199.7, 147.0, 138.3, 134.9, 133.0, 129.9, 128.4, 128.2, 126.8, 126.2, 124.8, 74.1, 37.6, 33.8, 31.4.

HRMS (DART-MS):  $m/z$  calcd for  $\text{C}_{17}\text{H}_{16}\text{OCl}$   $[\text{M}-\text{OH}]^+$ : 271.08842, found: 271.08712.

IR (neat,  $\text{cm}^{-1}$ ): 3455, 2970, 1736, 1682, 1570, 1370, 1201, 1068, 697.

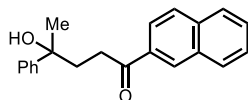

#### 4-hydroxy-1-(naphthalen-2-yl)-4-phenylpentan-1-one (16)

Product standard was prepared according to the General procedure I for the preparation of racemic compounds. Overall yield: 33%.

$^1\text{H}$  NMR (500 MHz,  $\text{CDCl}_3$ )  $\delta$  8.36 (s, 1H), 7.96 (dd,  $J = 8.7, 1.5$  Hz, 1H), 7.91 (d,  $J = 8.1$  Hz, 1H), 7.85 (d,  $J = 8.5$  Hz, 2H), 7.58 (t,  $J = 7.0$  Hz, 1H), 7.56 – 7.47 (m, 3H), 7.37 (t,  $J = 7.7$  Hz, 2H), 7.31 – 7.23 (m, 1H), 3.14 (dt,  $J = 17.5, 7.4$  Hz, 1H), 3.02 (ddd,  $J = 17.5, 7.3, 6.4$  Hz, 1H), 2.60 (s, 1H), 2.42 – 2.30 (m, 2H), 1.66 (s, 3H).

$^{13}\text{C}$  NMR (126 MHz,  $\text{CDCl}_3$ )  $\delta$  201.1, 147.2, 135.6, 134.1, 132.5, 129.8, 129.6, 128.5, 128.4, 128.3, 127.7, 126.7, 126.7, 124.9, 123.9, 74.2, 37.9, 33.8, 31.5.

HRMS (DART-MS):  $m/z$  calcd for  $\text{C}_{21}\text{H}_{19}\text{O}$   $[\text{M}-\text{OH}]^+$ : 287.14304, found: 287.14176.

IR (neat,  $\text{cm}^{-1}$ ): 3456, 2970, 1738, 1672, 1365, 1217, 1027, 762, 699.

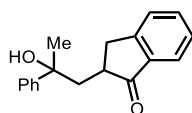

#### 2-(2-hydroxy-2-phenylpropyl)-2,3-dihydro-1H-inden-1-one (17)

Product standard was prepared according to the General procedure I for the preparation of racemic compounds. Overall yield: 38%.

$^1\text{H}$  NMR (500 MHz,  $\text{CDCl}_3$ )  $\delta$  7.73 (d,  $J = 7.7$  Hz, 1H), 7.62 – 7.47 (m, 3H), 7.42 (d,  $J = 7.7$  Hz, 1H), 7.39 – 7.31 (m, 3H), 7.24 (t,  $J = 7.4$  Hz, 1H), 3.38 (dd,  $J = 17.3, 8.1$  Hz, 1H), 3.14 (s, 1H), 2.92 (dd,  $J =$

17.3, 4.7 Hz, 1H), 2.71 (tt,  $J = 8.0, 5.0$  Hz, 1H), 2.50 (dd,  $J = 14.5, 5.2$  Hz, 1H), 1.96 (dd,  $J = 14.5, 7.9$  Hz, 1H), 1.67 (s, 3H).

$^{13}\text{C NMR}$  (126 MHz,  $\text{CDCl}_3$ )  $\delta$  209.7, 154.0, 148.0, 136.2, 134.9, 128.3, 127.4, 126.7, 126.3, 124.8, 124.0, 74.4, 45.2, 44.9, 34.9, 30.7.

**HRMS** (DART-MS):  $m/z$  calcd for  $\text{C}_{18}\text{H}_{17}\text{O}$   $[\text{M}-\text{OH}]^+$ : 249.12739, found: 249.12617.

**IR** (neat,  $\text{cm}^{-1}$ ): 3456, 2970, 1738, 1365, 1216, 911, 756, 701.

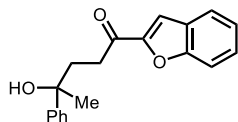

#### 1-(benzofuran-2-yl)-4-hydroxy-4-phenylpentan-1-one (18)

Product standard was prepared according to the General procedure I for the preparation of racemic compounds. Overall yield: 12%.

$^1\text{H NMR}$  (500 MHz,  $\text{CDCl}_3$ )  $\delta$  7.66 (d,  $J = 7.9$  Hz, 1H), 7.54 (d,  $J = 8.4$  Hz, 1H), 7.46 (td,  $J = 8.2, 4.2$  Hz, 3H), 7.41 (s, 1H), 7.36 (t,  $J = 7.7$  Hz, 2H), 7.32 – 7.28 (m, 1H), 7.28 – 7.22 (m, 1H), 3.01 (dt,  $J = 17.3, 7.4$  Hz, 1H), 2.87 (dt,  $J = 17.4, 7.0$  Hz, 1H), 2.44 (s, 1H), 2.32 (t,  $J = 7.3$  Hz, 2H), 1.64 (s, 3H).

$^{13}\text{C NMR}$  (126 MHz,  $\text{CDCl}_3$ )  $\delta$  191.9, 155.6, 152.3, 147.0, 128.3, 128.2, 127.0, 126.8, 124.9, 123.9, 123.3, 113.0, 112.5, 74.1, 37.6, 34.0, 31.3.

**HRMS** (DART-MS):  $m/z$  calcd for  $\text{C}_{19}\text{H}_{17}\text{O}_2$   $[\text{M}-\text{OH}]^+$ : 277.12231, found: 277.12106.

**IR** (neat,  $\text{cm}^{-1}$ ): 3483, 2970, 1738, 1670, 1560, 1365, 1216, 1011, 745.

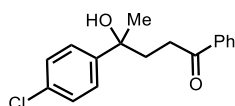

#### 4-(4-chlorophenyl)-4-hydroxy-1-phenylpentan-1-one (19)

Product standard was prepared according to the General procedure I for the preparation of racemic compounds. Overall yield: 26%.

$^1\text{H NMR}$  (500 MHz,  $\text{CDCl}_3$ )  $\delta$  7.89 (d,  $J = 7.3$  Hz, 2H), 7.55 (t,  $J = 7.4$  Hz, 1H), 7.48 – 7.39 (m, 4H), 7.33 (dd,  $J = 12.0, 5.0$  Hz, 2H), 3.09 – 2.96 (m, 2H), 2.90 (ddd,  $J = 17.8, 7.5, 6.2$  Hz, 1H), 2.38 – 2.21 (m, 2H), 1.62 (s, 3H).

$^{13}\text{C NMR}$  (126 MHz,  $\text{CDCl}_3$ )  $\delta$  201.2, 145.9, 136.6, 133.3, 132.4, 128.6, 128.4, 128.1, 126.5, 73.9, 37.6, 33.7, 31.3.

**HRMS** (DART-MS):  $m/z$  calcd for  $\text{C}_{17}\text{H}_{16}\text{OCl}$   $[\text{M}-\text{OH}]^+$ : 271.08842, found: 271.08738.

**IR** (neat,  $\text{cm}^{-1}$ ): 3480, 2961, 1673, 1487, 1206, 1088, 736, 686.

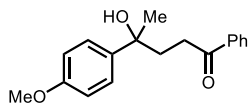

#### 4-hydroxy-4-(4-methoxyphenyl)-1-phenylpentan-1-one (20)

Product standard was prepared according to the General procedure I for the preparation of racemic compounds. Overall yield: 37%.

$^1\text{H NMR}$  (500 MHz,  $\text{CD}_3\text{CN}$ )  $\delta$  7.88 (d,  $J = 7.5$  Hz, 2H), 7.63 – 7.56 (m, 1H), 7.48 (t,  $J = 7.6$  Hz, 2H), 7.41 (d,  $J = 8.1$  Hz, 2H), 6.91 (d,  $J = 8.1$  Hz, 2H), 3.79 (s, 3H), 3.08 – 2.98 (m, 1H), 2.79 (ddd,  $J = 17.2, 9.1, 6.0$  Hz, 1H), 2.21 (s, 1H), 2.18 – 2.12 (m, 2H), 1.54 (s, 3H).

$^{13}\text{C NMR}$  (126 MHz,  $\text{CD}_3\text{CN}$ )  $\delta$  200.6, 158.2, 140.2, 137.1, 132.9, 128.6, 127.9, 126.2, 113.2, 73.1, 54.8, 38.2, 33.6, 30.1.

**HRMS** (DART-MS):  $m/z$  calcd for  $\text{C}_{18}\text{H}_{19}\text{O}_2$   $[\text{M}-\text{OH}]^+$ : 267.13796, found: 267.13683.

IR (neat,  $\text{cm}^{-1}$ ): 3471, 2968, 1676, 1610, 1509, 1244, 1176, 1030, 831, 743.

The NMR spectra is in agreement with published data<sup>18</sup>.

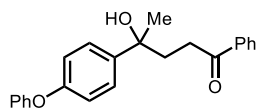

#### 4-hydroxy-4-(4-phenoxyphenyl)-1-phenylpentan-1-one (21)

Product standard was prepared according to the General procedure I for the preparation of racemic compounds. Overall yield: 15%.

**<sup>1</sup>H NMR** (500 MHz,  $\text{CD}_3\text{CN}$ )  $\delta$  7.89 (dd,  $J = 8.4, 1.2$  Hz, 2H), 7.63 – 7.57 (m, 1H), 7.48 (dt,  $J = 7.4, 3.4$  Hz, 4H), 7.42 – 7.34 (m, 2H), 7.14 (t,  $J = 7.4$  Hz, 1H), 7.04 – 6.94 (m, 4H), 3.31 (s, 1H), 3.04 (ddd,  $J = 17.1, 9.4, 6.1$  Hz, 1H), 2.83 (ddd,  $J = 17.1, 9.4, 5.6$  Hz, 1H), 2.29 – 2.09 (m, 2H), 1.57 (s, 3H).

**<sup>13</sup>C NMR** (126 MHz,  $\text{CD}_3\text{CN}$ )  $\delta$  200.5, 157.5, 155.6, 143.3, 137.1, 132.9, 129.9, 128.6, 127.9, 126.7, 123.3, 118.6, 118.3, 73.2, 38.2, 33.5, 30.1.

**HRMS** (DART-MS):  $m/z$  calcd for  $\text{C}_{23}\text{H}_{21}\text{O}_2$   $[\text{M}-\text{OH}]^+$ : 329.15361, found: 329.15211.

IR (neat,  $\text{cm}^{-1}$ ): 3490, 2969, 1738, 1667, 1365, 1231, 1078, 825, 761.

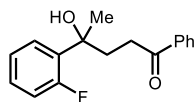

#### 4-(2-fluorophenyl)-4-hydroxy-1-phenylpentan-1-one (22)

Product standard was prepared according to the General procedure I for the preparation of racemic compounds. Overall yield: 8%.

**<sup>1</sup>H NMR** (500 MHz,  $\text{CD}_3\text{CN}$ )  $\delta$  7.87 (d,  $J = 8.5$  Hz, 2H), 7.68 (td,  $J = 8.2, 1.6$  Hz, 1H), 7.59 (t,  $J = 7.4$  Hz, 1H), 7.47 (t,  $J = 7.7$  Hz, 2H), 7.30 (tdd,  $J = 7.1, 5.0, 1.8$  Hz, 1H), 7.20 (td,  $J = 7.6, 1.2$  Hz, 1H), 7.08 (ddd,  $J = 12.4, 8.1, 1.1$  Hz, 1H), 3.05 (ddd,  $J = 17.0, 9.6, 5.8$  Hz, 1H), 2.79 (ddd,  $J = 17.2, 9.6, 5.3$  Hz, 1H), 2.44 – 2.33 (m, 1H), 2.26 – 2.15 (m, 2H), 1.63 (d,  $J = 0.8$  Hz, 3H).

**<sup>13</sup>C NMR** (126 MHz,  $\text{CD}_3\text{CN}$ )  $\delta$  200.5, 159.4 (d,  $J = 243.8$  Hz), 137.0, 134.3 (d,  $J = 12.8$  Hz), 132.9, 128.78 (d,  $J = 8.6$  Hz), 128.6, 127.9, 127.8, 124.1 (d,  $J = 3.3$  Hz), 115.7 (d,  $J = 24.0$  Hz), 72.4 (d,  $J = 4.1$  Hz), 36.0 (d,  $J = 4.0$  Hz), 33.7 (s), 28.6 (d,  $J = 4.1$  Hz).

**<sup>19</sup>F NMR** (470 MHz,  $\text{CD}_3\text{CN}$ )  $\delta$  -114.06 (s).

**HRMS** (DART-MS):  $m/z$  calcd for  $\text{C}_{17}\text{H}_{16}\text{OF}$   $[\text{M}-\text{OH}]^+$ : 255.11797, found: 255.11675.

IR (neat,  $\text{cm}^{-1}$ ): 3442, 2970, 1673, 1579, 1483, 1446, 1207, 1068, 757.

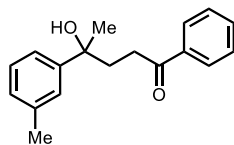

#### 4-hydroxy-1-phenyl-4-(m-tolyl)pentan-1-one (23)

Product standard was prepared according to the General procedure I for the preparation of racemic compounds. Overall yield: 20%.

**<sup>1</sup>H NMR** (500 MHz,  $\text{CD}_3\text{CN}$ )  $\delta$  7.87 (d,  $J = 7.2$  Hz, 2H), 7.59 (t,  $J = 7.4$  Hz, 1H), 7.47 (t,  $J = 7.8$  Hz, 2H), 7.34 (s, 1H), 7.29 (d,  $J = 7.9$  Hz, 1H), 7.25 (t,  $J = 7.6$  Hz, 1H), 7.07 (d,  $J = 7.3$  Hz, 1H), 3.04 (ddd,  $J = 16.8, 9.4, 6.3$  Hz, 1H), 2.78 (ddd,  $J = 17.0, 9.3, 5.8$  Hz, 1H), 2.36 (s, 3H), 2.17 (dt,  $J = 9.2, 5.5$  Hz, 2H), 1.55 (s, 3H).

$^{13}\text{C}$  NMR (126 MHz,  $\text{CD}_3\text{CN}$ )  $\delta$  200.5, 148.2, 137.6, 137.0, 132.9, 128.6, 128.0, 127.9, 127.0, 125.7, 122.0, 73.3, 38.1, 33.6, 30.1, 20.7.

HRMS (DART-MS):  $m/z$  calcd for  $\text{C}_{18}\text{H}_{19}\text{O}$   $[\text{M}-\text{OH}]^+$ : 251.14304, found: 251.14183.

IR (neat,  $\text{cm}^{-1}$ ): 3475, 2970, 1674, 1597, 1447, 1007, 742, 688.

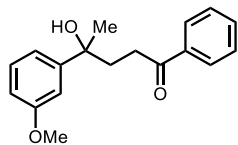

#### 4-hydroxy-4-(3-methoxyphenyl)-1-phenylpentan-1-one (24)

Product standard was prepared according to the General procedure for the preparation of racemic compounds. Overall yield: 11%.

$^1\text{H}$  NMR (500 MHz,  $\text{CDCl}_3$ )  $\delta$  7.88 (d,  $J = 7.4$  Hz, 2H), 7.53 (t,  $J = 7.4$  Hz, 1H), 7.41 (t,  $J = 7.7$  Hz, 2H), 7.27 – 7.24 (m, 1H), 7.06 (s, 1H), 7.01 (d,  $J = 7.7$  Hz, 1H), 6.78 (dd,  $J = 8.1, 1.8$  Hz, 1H), 3.81 (s, 3H), 3.01 (dt,  $J = 17.6, 7.4$  Hz, 1H), 2.89 (dt,  $J = 17.8, 6.9$  Hz, 1H), 2.65 (s, 1H), 2.39 – 2.18 (m, 2H), 1.61 (s, 3H).

$^{13}\text{C}$  NMR (126 MHz,  $\text{CDCl}_3$ )  $\delta$  201.2, 159.6, 149.1, 136.8, 133.1, 129.3, 128.5, 128.1, 117.3, 111.8, 111.0, 74.1, 55.2, 37.7, 33.8, 31.4.

HRMS (DART-MS):  $m/z$  calcd for  $\text{C}_{18}\text{H}_{19}\text{O}_2$   $[\text{M}-\text{OH}]^+$ : 267.13796, found: 267.13678.

IR (neat,  $\text{cm}^{-1}$ ): 3473, 2953, 1674, 1558, 1134, 1030, 766, 689.

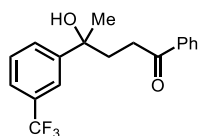

#### 4-hydroxy-1-phenyl-4-(3-(trifluoromethyl)phenyl)pentan-1-one (25)

Product standard was prepared according to the General procedure I for the preparation of racemic compounds. Overall yield: 15%.

$^1\text{H}$  NMR (500 MHz,  $\text{CDCl}_3$ )  $\delta$  7.87 (d,  $J = 7.4$  Hz, 2H), 7.77 (s, 1H), 7.64 (d,  $J = 7.7$  Hz, 1H), 7.59 – 7.48 (m, 2H), 7.44 (dt,  $J = 19.7, 7.7$  Hz, 3H), 3.06 – 2.83 (m, 3H), 2.32 (ddq,  $J = 28.4, 14.5, 7.1$  Hz, 2H), 1.64 (s, 3H).

$^{13}\text{C}$  NMR (126 MHz,  $\text{CDCl}_3$ )  $\delta$  201.1, 148.5, 136.6, 133.3, 130.6 (q,  $J = 32.0$  Hz), 128.7, 128.6, 128.4, 128.1, 124.3 (q,  $J = 272.3$  Hz), 123.6 (q,  $J = 3.8$  Hz), 121.8 (q,  $J = 3.8$  Hz), 74.0, 37.6, 33.6, 31.3.

$^{19}\text{F}$  NMR (470 MHz,  $\text{CDCl}_3$ )  $\delta$  -62.43 (s).

HRMS (DART-MS):  $m/z$  calcd for  $\text{C}_{18}\text{H}_{16}\text{OF}_3$   $[\text{M}-\text{OH}]^+$ : 305.11478, found: 305.11332.

IR (neat,  $\text{cm}^{-1}$ ): 3494, 2969, 1666, 1597, 1320, 1131, 1068, 809, 744.

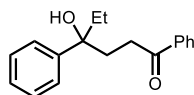

#### 4-hydroxy-1,4-diphenylhexan-1-one (26)

Product standard was prepared according to the General procedure I for the preparation of racemic compounds. Overall yield: 58%.

$^1\text{H}$  NMR (500 MHz,  $\text{CDCl}_3$ )  $\delta$  7.88 – 7.81 (m, 2H), 7.52 (t,  $J = 7.4$  Hz, 1H), 7.40 (dd,  $J = 11.9, 5.3$  Hz, 4H), 7.35 (t,  $J = 7.7$  Hz, 2H), 7.23 (t,  $J = 7.3$  Hz, 1H), 3.00 (ddd,  $J = 17.8, 8.0, 6.8$  Hz, 1H), 2.81 (ddd,  $J = 17.8, 7.9, 5.8$  Hz, 1H), 2.52 (s, 1H), 2.38 – 2.20 (m, 2H), 2.01 – 1.81 (m, 2H), 0.80 (t,  $J = 7.4$  Hz, 3H).

$^{13}\text{C NMR}$  (126 MHz,  $\text{CDCl}_3$ )  $\delta$  201.4, 145.2, 136.9, 133.1, 128.5, 128.2, 128.1, 126.5, 125.5, 76.7, 36.5, 36.3, 33.5, 7.8.

**HRMS** (DART-MS):  $m/z$  calcd for  $\text{C}_{18}\text{H}_{19}\text{O}$   $[\text{M}-\text{OH}]^+$ : 251.14304, found: 251.14186.

**IR** (neat,  $\text{cm}^{-1}$ ): 3420, 2968, 1717, 1665, 1446, 1273, 978, 686.

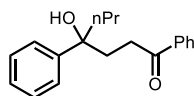

#### 4-hydroxy-1,4-diphenylheptan-1-one (27)

Product standard was prepared according to the General procedure I for the preparation of racemic compounds. Overall yield: 21%.

$^1\text{H NMR}$  (500 MHz,  $\text{CD}_3\text{CN}$ )  $\delta$  7.85 (d,  $J = 7.4$  Hz, 2H), 7.58 (t,  $J = 7.4$  Hz, 1H), 7.47 (t,  $J = 7.9$  Hz, 4H), 7.36 (t,  $J = 7.7$  Hz, 2H), 7.24 (t,  $J = 7.3$  Hz, 1H), 3.08 – 2.98 (m, 1H), 2.68 (ddd,  $J = 17.1, 9.2, 5.8$  Hz, 1H), 2.25 – 2.14 (m, 3H), 1.92 – 1.75 (m, 2H), 1.43 – 1.29 (m, 1H), 1.09 – 0.93 (m, 1H), 0.85 (t,  $J = 7.4$  Hz, 3H).

$^{13}\text{C NMR}$  (126 MHz,  $\text{CD}_3\text{CN}$ )  $\delta$  200.7, 146.3, 137.0, 132.9, 128.6, 127.9, 127.8, 126.1, 125.5, 75.9, 45.6, 37.1, 33.2, 16.6, 13.7.

**HRMS** (DART-MS):  $m/z$  calcd for  $\text{C}_{19}\text{H}_{21}\text{O}$   $[\text{M}-\text{OH}]^+$ : 265.15869, found: 265.15744.

**IR** (neat,  $\text{cm}^{-1}$ ): 3502, 2955, 1711, 1660, 1595, 1577, 1468, 1174, 922, 701.

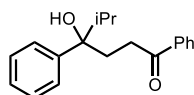

#### 4-hydroxy-5-methyl-1,4-diphenylhexan-1-one (28)

Product standard was prepared according to the General procedure I for the preparation of racemic compounds. Overall yield: 15%.

$^1\text{H NMR}$  (500 MHz,  $\text{CD}_3\text{CN}$ )  $\delta$  7.84 – 7.80 (m, 2H), 7.57 (t,  $J = 7.4$  Hz, 1H), 7.47 – 7.42 (m, 4H), 7.36 (t,  $J = 7.8$  Hz, 2H), 7.25 (t,  $J = 7.3$  Hz, 1H), 2.94 (ddd,  $J = 17.2, 9.7, 5.8$  Hz, 1H), 2.61 (ddd,  $J = 17.3, 9.4, 5.4$  Hz, 1H), 2.28 (dddd,  $J = 18.7, 14.3, 9.2, 5.1$  Hz, 2H), 2.08 (dt,  $J = 13.6, 6.8$  Hz, 1H), 0.99 (d,  $J = 6.8$  Hz, 3H), 0.70 (d,  $J = 6.9$  Hz, 3H).

$^{13}\text{C NMR}$  (126 MHz,  $\text{CD}_3\text{CN}$ )  $\delta$  200.9, 145.5, 137.0, 132.9, 128.6, 127.8, 127.7, 126.1, 126.0, 78.1, 38.3, 33.8, 33.7, 17.0, 16.1.

**HRMS** (DART-MS):  $m/z$  calcd for  $\text{C}_{19}\text{H}_{21}\text{O}$   $[\text{M}-\text{OH}]^+$ : 265.15869, found: 265.15748.

**IR** (neat,  $\text{cm}^{-1}$ ): 3464, 2962, 1665, 1593, 1359, 1219, 1016, 951, 764.

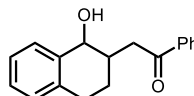

#### 2-(1-hydroxy-1,2,3,4-tetrahydronaphthalen-2-yl)-1-phenylethan-1-one (29)

Product standard was prepared according to the General procedure I for the preparation of racemic compounds. Overall yield: 50%.

$^1\text{H NMR}$  (500 MHz,  $\text{CDCl}_3$ )  $\delta$  8.04 (d,  $J = 7.0$  Hz, 2H), 7.57 (t,  $J = 7.4$  Hz, 1H), 7.48 (t,  $J = 7.7$  Hz, 2H), 7.35 (d,  $J = 5.2$  Hz, 1H), 7.22 (td,  $J = 7.2, 1.8$  Hz, 2H), 7.14 (d,  $J = 6.6$  Hz, 1H), 4.73 (t,  $J = 4.3$  Hz, 1H), 3.34 (dd,  $J = 16.8, 7.2$  Hz, 1H), 3.17 – 3.05 (m, 1H), 2.96 – 2.81 (m, 2H), 2.56 (ddq,  $J = 10.6, 6.9, 3.3$  Hz, 1H), 1.99 – 1.71 (m, 3H).

$^{13}\text{C NMR}$  (126 MHz,  $\text{CDCl}_3$ )  $\delta$  200.3, 138.1, 137.2, 136.6, 133.2, 129.9, 129.1, 128.6, 128.3, 128.0, 126.3, 69.7, 40.5, 35.9, 28.8, 23.5.



**HRMS** (DART-MS):  $m/z$  calcd for  $C_{18}H_{17}O$   $[M-OH]^+$ : 249.12739, found: 249.12632.

**IR** (neat,  $cm^{-1}$ ): 3510, 3453, 2929, 1738, 1676, 1578, 1447, 1365, 1205, 1102, 738.

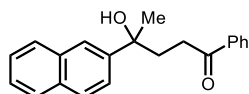

#### 4-hydroxy-4-(naphthalen-2-yl)-1-phenylpentan-1-one (30)

Product standard was prepared according to the General procedure I for the preparation of racemic compounds. Overall yield: 26%.

**$^1H$  NMR** (500 MHz,  $CD_3CN$ )  $\delta$  8.02 (s, 1H), 7.94 – 7.82 (m, 5H), 7.63 (dd,  $J = 8.7, 1.9$  Hz, 1H), 7.57 (t,  $J = 7.4$  Hz, 1H), 7.51 (tt,  $J = 6.8, 5.1$  Hz, 2H), 7.44 (t,  $J = 7.8$  Hz, 2H), 3.07 (ddd,  $J = 17.1, 9.8, 5.7$  Hz, 1H), 2.80 (ddd,  $J = 17.2, 9.7, 5.4$  Hz, 1H), 2.39 – 2.21 (m, 2H), 1.66 (s, 3H).

**$^{13}C$  NMR** (126 MHz,  $CD_3CN$ )  $\delta$  200.5, 145.7, 137.0, 133.2, 132.9, 132.2, 128.5, 128.0, 127.8, 127.6, 127.4, 126.0, 125.6, 124.0, 123.3, 73.6, 37.9, 33.6, 30.1.

**HRMS** (DART-MS):  $m/z$  calcd for  $C_{21}H_{19}O$   $[M-OH]^+$ : 287.14304, found: 287.14175.

**IR** (neat,  $cm^{-1}$ ): 3455, 2970, 1673, 1597, 1447, 1370, 1121, 819, 742.

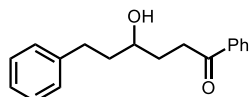

#### 4-hydroxy-1,6-diphenylhexan-1-one (31)

Product standard was prepared according to the General procedure I for the preparation of racemic compounds. Overall yield: 23%.

**$^1H$  NMR** (500 MHz,  $CDCl_3$ )  $\delta$  7.98 (d,  $J = 7.3$  Hz, 2H), 7.57 (t,  $J = 7.4$  Hz, 1H), 7.46 (t,  $J = 7.7$  Hz, 2H), 7.29 (t,  $J = 7.5$  Hz, 2H), 7.20 (dd,  $J = 15.0, 7.4$  Hz, 3H), 3.72 (s, 1H), 3.22 – 3.07 (m, 2H), 2.87 – 2.78 (m, 1H), 2.76 – 2.65 (m, 1H), 2.06 – 1.97 (m, 1H), 1.93 (d,  $J = 5.2$  Hz, 1H), 1.92 – 1.85 (m, 1H), 1.86 – 1.79 (m, 2H).

**$^{13}C$  NMR** (126 MHz,  $CDCl_3$ )  $\delta$  200.8, 142.0, 136.9, 133.2, 128.6, 128.5, 128.4, 128.1, 125.9, 70.9, 39.5, 35.0, 32.1, 31.4.

**HRMS** (DART-MS):  $m/z$  calcd for  $C_{18}H_{19}O$   $[M-OH]^+$ : 251.14304, found: 251.14228.

**IR** (neat,  $cm^{-1}$ ): 3455, 3024, 2970, 1738, 1447, 1365, 1216, 1068, 902, 685.

The NMR spectra is in agreement with published data<sup>19</sup>.

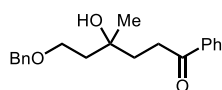

#### 6-(benzyloxy)-4-hydroxy-4-methyl-1-phenylhexan-1-one (32)

Product standard was prepared according to the General procedure I for the preparation of racemic compounds. Overall yield: 8%.

**$^1H$  NMR** (500 MHz,  $CD_3CN$ )  $\delta$  8.01 (d,  $J = 7.2$  Hz, 2H), 7.61-7.64 (m, 1H), 7.52 (t,  $J = 7.7$  Hz, 2H), 7.32 - 7.36 (m, 4H), 7.30-7.32 (m, 1H), 4.51 (s, 2H), 3.69 (td,  $J = 6.5, 1.8$  Hz, 2H), 3.11 (ddd,  $J = 8.6, 6.6, 1.8$  Hz, 2H), 3.00 (s, 1H), 1.77-1.91 (m, 4H), 1.20 (s, 3H).

**$^{13}C$  NMR** (126 MHz,  $CD_3CN$ )  $\delta$  200.6, 138.7, 137.2, 132.9, 128.6, 128.3, 127.9, 127.7, 127.5, 72.6, 70.9, 66.9, 40.5, 36.0, 33.3, 26.3.

**HRMS** (DART-MS):  $m/z$  calcd for  $C_{20}H_{23}O_2$   $[M-OH]^+$ : 295.16926, found: 295.16823.

IR (neat,  $\text{cm}^{-1}$ ): 3463, 2928, 1679, 1597, 1449, 1284, 1097, 697.

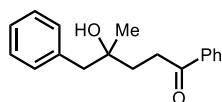

#### 4-hydroxy-4-methyl-1,5-diphenylpentan-1-one (33)

Product standard was prepared according to the General procedure I for the preparation of racemic compounds. Overall yield: 20%.

$^1\text{H NMR}$  (500 MHz,  $\text{CDCl}_3$ )  $\delta$  7.99 (d,  $J = 7.3$  Hz, 2H), 7.56 (t,  $J = 7.4$  Hz, 1H), 7.46 (t,  $J = 7.6$  Hz, 2H), 7.32 (t,  $J = 7.3$  Hz, 3H), 7.28 – 7.21 (m, 2H), 3.26 – 3.09 (m, 2H), 2.83 (dd,  $J = 30.5, 13.2$  Hz, 2H), 2.09 – 1.89 (m, 2H), 1.20 (s, 3H).

$^{13}\text{C NMR}$  (126 MHz,  $\text{CDCl}_3$ )  $\delta$  200.7, 137.2, 136.9, 133.1, 130.6, 128.6, 128.3, 128.1, 126.6, 72.0, 48.8, 35.3, 33.2, 26.5.

HRMS (DART-MS):  $m/z$  calcd for  $\text{C}_{18}\text{H}_{19}\text{O}$   $[\text{M}-\text{OH}]^+$ : 251.14304, found: 251.14190.

IR (neat,  $\text{cm}^{-1}$ ): 3464, 2970, 1738, 1365, 1228, 1216, 1034, 809, 698.

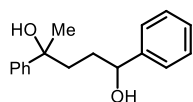

#### 1,4-diphenylpentane-1,4-diol (34)

Product standard was prepared according to the General procedure I for the product derivatization. Yield: Quant.

$^1\text{H NMR}$  (500 MHz,  $\text{CDCl}_3$ )  $\delta$  7.41 (ddd,  $J = 8.1, 6.9, 1.5$  Hz, 2H), 7.36 – 7.27 (m, 3H), 7.28 – 7.19 (m, 5H), 4.64 (ddd,  $J = 16.6, 7.9, 4.9$  Hz, 1H), 2.72 (br, 1H), 2.51 (br, 1H), 2.12 – 1.90 (m, 1H), 1.86–1.60 (m, 3H), 1.55 (s, 3H).

$^{13}\text{C NMR}$  (126 MHz,  $\text{CDCl}_3$ )  $\delta$  147.8, 147.7, 144.6, 144.5, 128.4, 128.2, 128.2, 127.5, 127.5, 126.6, 126.5, 125.8, 124.9, 124.8, 74.9, 74.4, 74.4, 74.4, 40.5, 39.9, 33.7, 33.5, 31.0, 30.5.

HRMS (DART-MS):  $m/z$  calcd for  $\text{C}_{17}\text{H}_{17}$   $[\text{M}-\text{H}_2\text{O}-\text{OH}]^+$ : 221.13248, found: 221.13182.

The NMR spectra is in agreement with published data<sup>19</sup>.

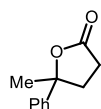

#### 5-methyl-5-phenyldihydrofuran-2(3H)-one (35)

Product standard was prepared according to the General procedure II for the product derivatization. Yield: 62%.

$^1\text{H NMR}$  (500 MHz,  $\text{CD}_3\text{CN}$ )  $\delta$  7.46 – 7.40 (m, 4H), 7.34 (ddt,  $J = 8.5, 5.0, 3.0$  Hz, 1H), 2.75 – 2.58 (m, 1H), 2.56 – 2.41 (m, 3H), 1.70 (s, 3H).

$^{13}\text{C NMR}$  (126 MHz,  $\text{CD}_3\text{CN}$ )  $\delta$  176.4, 145.1, 128.5, 127.5, 124.2, 86.6, 35.5, 28.6, 28.3.

HRMS (DART-MS):  $m/z$  calcd for  $\text{C}_{11}\text{H}_{13}\text{O}_2$   $[\text{M}+\text{H}]^+$ : 177.09101, found: 177.09027.

The NMR spectra is in agreement with published data<sup>20</sup>.

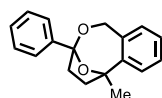

#### 6-methyl-3-phenyl-3,4,5,6-tetrahydro-1H-3,6-epoxybenzo[c]oxocine (37)

Product standard was prepared according to the General procedure I for the preparation of racemic

compounds. Overall yield: 33%.

**<sup>1</sup>H NMR** (500 MHz, CD<sub>3</sub>CN) δ 7.67 (dt, *J* = 6.5, 1.4 Hz, 2H), 7.49 – 7.41 (m, 2H), 7.42 – 7.34 (m, 2H), 7.34 – 7.26 (m, 1H), 7.21 (td, *J* = 7.4, 1.4 Hz, 1H), 7.12 (d, *J* = 7.4 Hz, 1H), 4.96 (d, *J* = 14.1 Hz, 1H), 4.45 (d, *J* = 14.2 Hz, 1H), 2.37 (ddd, *J* = 11.6, 5.7, 3.9 Hz, 1H), 2.27 – 2.21 (m, 2H), 2.14 (dd, *J* = 12.1, 9.4 Hz, 1H), 1.85 (s, 3H).

**<sup>13</sup>C NMR** (126 MHz, CD<sub>3</sub>CN) δ 148.01, 140.5, 138.1, 128.2, 128.2, 127.7, 127.4, 126.3, 126.1, 124.8, 109.30, 86.7, 65.3, 40.9, 39.9, 26.7.

**HRMS** (DART-MS): *m/z* calcd for C<sub>18</sub>H<sub>19</sub>O<sub>2</sub> [M+H]<sup>+</sup>: 267.13796, found: 267.13697.

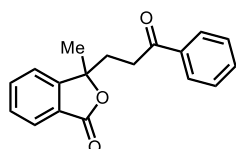

### 3-methyl-3-(3-oxo-3-phenylpropyl)isobenzofuran-1(3H)-one (40)

Product standard was prepared according to the General procedure II for the preparation of racemic compounds. Overall yield: 15%.

**<sup>1</sup>H NMR** (500 MHz, CDCl<sub>3</sub>) δ 7.88 (d, *J* = 7.6 Hz, 1H), 7.82 (d, *J* = 7.4 Hz, 2H), 7.67 (t, *J* = 7.5 Hz, 1H), 7.52 (q, *J* = 7.0 Hz, 2H), 7.41 (t, *J* = 7.9 Hz, 3H), 3.12 – 3.01 (m, 1H), 2.66 – 2.50 (m, 2H), 2.42 – 2.33 (m, 1H), 1.71 (s, 3H).

**<sup>13</sup>C NMR** (126 MHz, CDCl<sub>3</sub>) δ 198.7, 169.8, 153.2, 136.4, 134.4, 133.3, 129.3, 128.6, 128.0, 125.9, 121.1, 87.0, 33.7, 32.6, 26.3.

**HRMS** (ESI): *m/z* calcd for C<sub>18</sub>H<sub>17</sub>O<sub>3</sub> [M+H]<sup>+</sup>: 2881.11932, found: 281.11722.

**IR** (neat, cm<sup>-1</sup>): 2982, 1748, 1708, 1680, 1465, 1220, 1031, 718, 608.

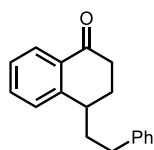

### 4-phenethyl-3,4-dihydronaphthalen-1(2H)-one (41)

Product standard was prepared according to the General procedure I for the preparation of racemic compounds. Overall yield: 6%.

**<sup>1</sup>H NMR** (500 MHz, CD<sub>3</sub>CN) δ 7.96 (d, *J* = 7.7 Hz, 1H), 7.56 (td, *J* = 7.7, 1.3 Hz, 1H), 7.42 – 7.26 (m, 6H), 7.21 (t, *J* = 7.1 Hz, 1H), 3.02 (m, 1H), 2.88 – 2.78 (m, 2H), 2.75 – 2.65 (m, 1H), 2.55 (dt, *J* = 17.7, 4.9 Hz, 1H), 2.35 – 2.22 (m, 1H), 2.18 (m, 1H), 2.09 – 2.00 (m, 2H).

**<sup>13</sup>C NMR** (126 MHz, CD<sub>3</sub>CN) δ 197.7, 148.5, 142.3, 133.4, 131.9, 128.6, 128.4, 128.4, 126.6, 126.6, 125.8, 37.4, 36.1, 34.5, 33.4, 26.2.

**HRMS** (DART-MS): *m/z* calcd for C<sub>18</sub>H<sub>19</sub>O [M+H]<sup>+</sup>: 251.14304, found: 251.14183.

**IR** (neat, cm<sup>-1</sup>): 3024, 2925, 1738, 1680, 1599, 1477, 1282, 763, 697.

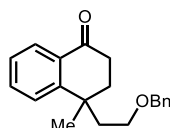

### 6-(benzyloxy)-4-hydroxy-4-methyl-1-phenylhexan-1-one (42)

Product standard was prepared according to the General procedure I for the preparation of racemic compounds. Overall yield: 3%.

**<sup>1</sup>H NMR** (500 MHz, CDCl<sub>3</sub>) δ 8.04 (dd, *J* = 7.8, 1.0 Hz, 1H), 7.54 – 7.48 (m, 1H), 7.37 (d, *J* = 7.8 Hz,

1H), 7.32 (dd,  $J = 13.1, 6.7$  Hz, 3H), 7.28 (d,  $J = 7.0$  Hz, 3H), 4.44 (s, 2H), 3.56 – 3.44 (m, 2H), 2.82 – 2.64 (m, 2H), 2.24 – 2.10 (m, 2H), 1.97 (dq,  $J = 9.3, 6.2$  Hz, 2H), 1.42 (s, 3H).

$^{13}\text{C NMR}$  (126 MHz,  $\text{CDCl}_3$ )  $\delta$  198.3, 151.0, 138.2, 133.7, 131.6, 128.4, 127.6, 127.5, 126.5, 126.1, 73.1, 67.1, 40.6, 36.2, 34.8, 34.3, 28.0.

**HRMS** (DART-MS):  $m/z$  calcd for  $\text{C}_{20}\text{H}_{23}\text{O}_2$   $[\text{M}+\text{H}]^+$ : 295.16926, found: 295.16786.

**IR** (neat,  $\text{cm}^{-1}$ ): 2929, 2861, 1738, 1680, 1597, 1452, 1284, 1095, 734, 696.

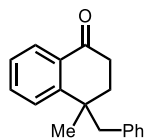

#### 4-benzyl-4-methyl-3,4-dihydronaphthalen-1(2H)-one (43)

Product standard was prepared according to the General procedure I for the preparation of racemic compounds. Overall yield: 9%.

$^1\text{H NMR}$  (500 MHz, MeOD)  $\delta$  7.99 (d,  $J = 7.8$  Hz, 1H), 7.56 (t,  $J = 7.5$  Hz, 1H), 7.42 – 7.31 (m, 2H), 7.26 – 7.17 (m, 3H), 7.05 – 6.97 (m, 2H), 3.01 (dd,  $J = 31.0, 13.4$  Hz, 2H), 2.91 – 2.77 (m, 1H), 2.62 (dt,  $J = 17.7, 5.1$  Hz, 1H), 2.08 (dt,  $J = 13.6, 5.3$  Hz, 1H), 1.99 – 1.91 (m, 1H), 1.38 (s, 3H).

$^{13}\text{C NMR}$  (126 MHz, MeOD)  $\delta$  199.1, 151.2, 137.7, 133.5, 131.4, 130.2, 127.5, 127.0, 126.7, 126.2, 126.1, 46.7, 37.6, 34.3, 33.7, 26.6.

**HRMS** (DART-MS):  $m/z$  calcd for  $\text{C}_{18}\text{H}_{19}\text{O}$   $[\text{M}+\text{H}]^+$ : 251.14304, found: 251.14201.

**IR** (neat,  $\text{cm}^{-1}$ ): 3026, 2921, 1738, 1679, 1451, 1284, 910, 770, 604.

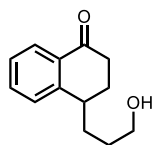

#### 4-(3-hydroxypropyl)-3,4-dihydronaphthalen-1(2H)-one (44)

Product standard was prepared according to the General procedure I for the preparation of racemic compounds. Overall yield: 3%.

$^1\text{H NMR}$  (500 MHz,  $\text{CDCl}_3$ )  $\delta$  8.02 (d,  $J = 7.7$  Hz, 1H), 7.48 (td,  $J = 7.6, 1.2$  Hz, 1H), 7.41 – 7.22 (m, 2H), 3.69 (t,  $J = 6.2$  Hz, 2H), 3.01 – 2.90 (m, 1H), 2.82 – 2.73 (m, 1H), 2.59 (dt,  $J = 17.8, 5.0$  Hz, 1H), 2.27 (ddd,  $J = 11.8, 9.0, 7.2$  Hz, 1H), 2.15 – 2.00 (m, 1H), 1.77 (tdd,  $J = 16.9, 10.7, 5.9$  Hz, 3H), 1.69 – 1.61 (m, 1H).

$^{13}\text{C NMR}$  (126 MHz,  $\text{CDCl}_3$ )  $\delta$  198.3, 148.0, 133.5, 131.9, 128.3, 127.4, 126.7, 62.8, 37.9, 34.9, 30.8, 30.7, 26.9.

**HRMS** (DART-MS):  $m/z$  calcd for  $\text{C}_{13}\text{H}_{17}\text{O}_2$   $[\text{M}+\text{H}]^+$ : 205.12231, found: 205.12231.

**IR** (neat,  $\text{cm}^{-1}$ ): 3398, 2933, 1678, 1597, 1283, 1053, 765, 550.

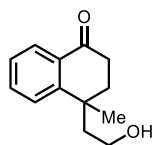

#### 4-(2-hydroxyethyl)-4-methyl-3,4-dihydronaphthalen-1(2H)-one (45)

Product standard was prepared according to the General procedure I for the preparation of racemic compounds. Overall yield: 5%.

**<sup>1</sup>H NMR** (500 MHz, CD<sub>3</sub>CN) δ 7.96 (dd, *J* = 7.8, 1.6 Hz, 1H), 7.60 (td, *J* = 7.6, 1.5 Hz, 1H), 7.51 (dd, *J* = 7.9, 1.3 Hz, 1H), 7.38 – 7.32 (m, 1H), 3.55 (td, *J* = 7.3, 5.1 Hz, 2H), 2.84 – 2.61 (m, 2H), 2.57 (p, *J* = 5.3 Hz, 1H), 2.30 – 2.11 (m, 2H), 2.07 – 2.00 (m, 1H), 1.91 – 1.80 (m, 1H), 1.42 (s, 3H).

**<sup>13</sup>C NMR** (126 MHz, CD<sub>3</sub>CN) δ 197.8, 151.7, 133.6, 131.5, 126.8, 126.5, 126.3, 58.3, 43.4, 35.9, 34.5, 33.8, 27.1.

**HRMS** (DART-MS): *m/z* calcd for C<sub>13</sub>H<sub>17</sub>O<sub>2</sub> [M+H]<sup>+</sup>: 205.12231, found: 205.12135.

**IR** (neat, cm<sup>-1</sup>): 3396, 2931, 1737, 1674, 1597, 1478, 1285, 1047, 1015, 756.

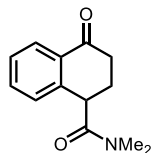

***N,N*-dimethyl-4-oxo-1,2,3,4-tetrahydronaphthalene-1-carboxamide (46)**

Product standard was prepared according to the General procedure I for the preparation of racemic compounds. Overall yield: 3%.

**<sup>1</sup>H NMR** (500 MHz, CD<sub>3</sub>CN) δ 7.98 (d, *J* = 7.8 Hz, 1H), 7.55 (tt, *J* = 7.5, 1.4 Hz, 1H), 7.41 (t, *J* = 7.5 Hz, 1H), 7.21 (d, *J* = 7.7 Hz, 1H), 4.44 (t, *J* = 5.6 Hz, 1H), 3.23 (d, *J* = 1.3 Hz, 3H), 2.97 (d, *J* = 1.2 Hz, 3H), 2.81 – 2.68 (m, 1H), 2.58 (dtd, *J* = 17.4, 6.4, 1.2 Hz, 1H), 2.41 – 2.24 (m, 2H).

**<sup>13</sup>C NMR** (126 MHz, CD<sub>3</sub>CN) δ 197.3, 172.3, 143.5, 133.3, 133.2, 128.3, 127.2, 126.5, 41.1, 37.1, 35.4, 34.9, 25.9.

**HRMS** (DART-MS): *m/z* calcd for C<sub>13</sub>H<sub>16</sub>NO<sub>2</sub> [M+H]<sup>+</sup>: 218.11756, found: 218.11648.

**IR** (neat, cm<sup>-1</sup>): 2970, 1738, 1680, 1365, 1216, 1010, 827, 769.

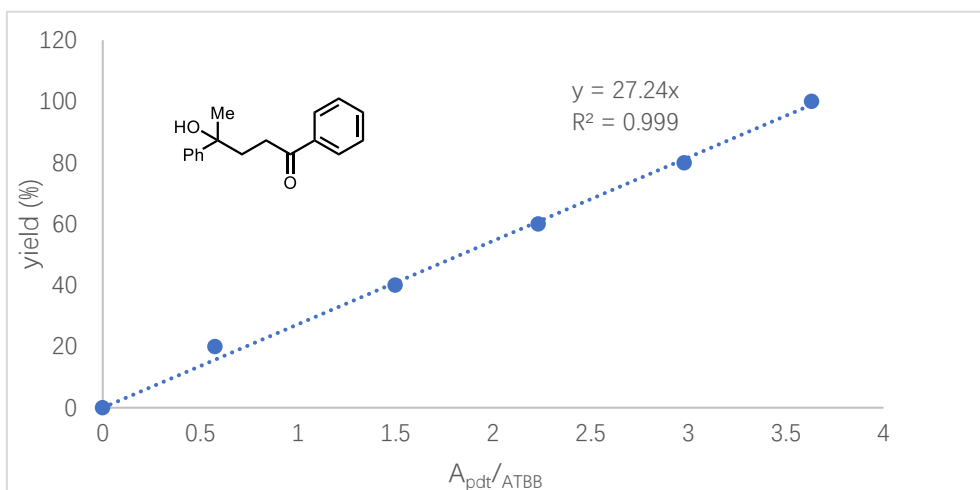

Enzymatic reaction was conducted according to the general procedure for hydroxylation reaction in vials using prop-1-en-2-ylbenzene (**1a**) and 2-bromo-1-phenylethan-1-one (**2a**) as the starting materials.

**Yield:** 96%. 1 mmol scale: 55% isolated yield.

**Enantioselectivity:** 95:5 er. Chiral HPLC method: OJ-H column, 220 nm, 10% isopropanol/hexanes, flow rate 1.0 mL/min, room temperature,  $t_R$  (major) = 25.00 min,  $t_R$  (minor) = 15.11 min.

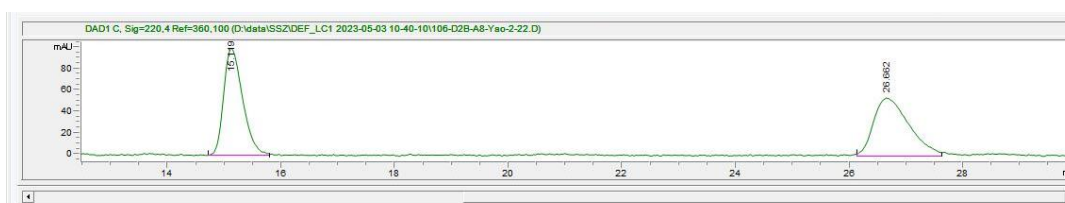

| # | Time   | Type | Area   | Height | Width  | Area%  | Symmetry |
|---|--------|------|--------|--------|--------|--------|----------|
| 1 | 15.119 | BV   | 2398.6 | 101.8  | 0.3489 | 49.854 | 0.634    |
| 2 | 26.662 | VV   | 2412.7 | 55.2   | 0.522  | 50.146 | 0.568    |

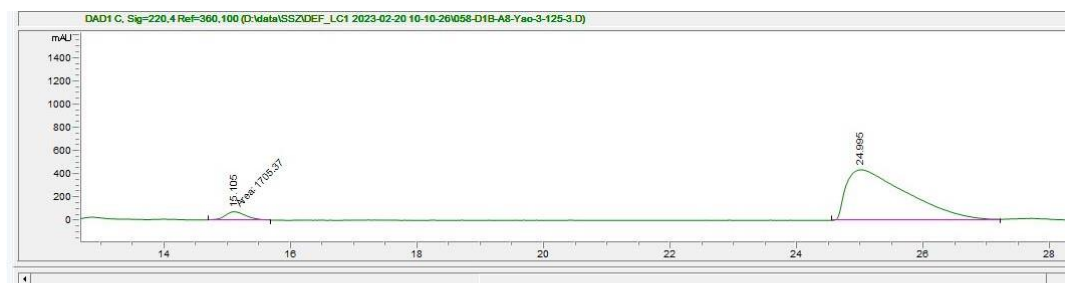

| # | Time   | Type | Area    | Height | Width  | Area%  | Symmetry |
|---|--------|------|---------|--------|--------|--------|----------|
| 1 | 15.105 | MM   | 1705.4  | 72     | 0.3948 | 5.451  | 0.716    |
| 2 | 24.995 | VV   | 29580.6 | 435.3  | 0.8328 | 94.549 | 0.287    |

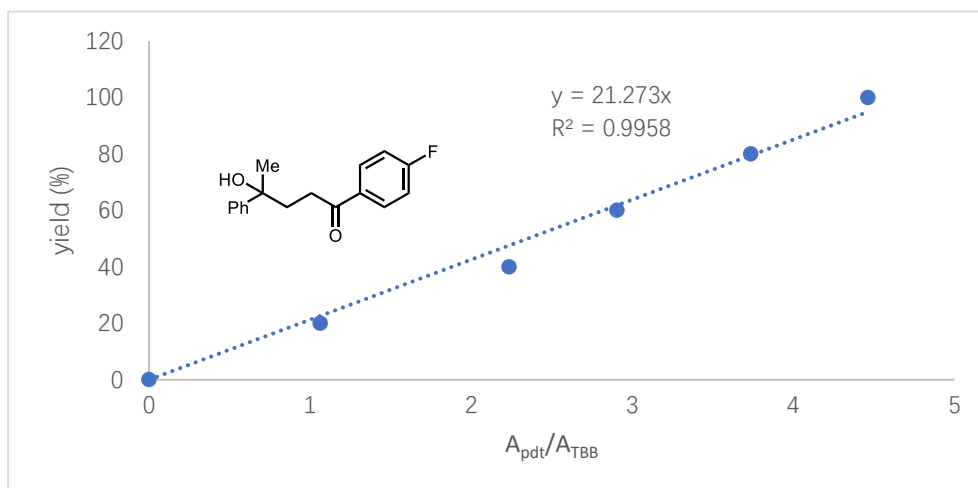

Enzymatic reaction was conducted according to the general procedure for hydroxylation reaction in vials using prop-1-en-2-ylbenzene (**1a**) and 2-bromo-1-(4-fluorophenyl)ethan-1-one (**2b**) as the starting materials.

**Yield:** 50% (1.5 mol% S34Q).

**Enantioselectivity:** 91:9 er. Chiral HPLC method: OJ-H column, 254 nm, 7% isopropanol/hexanes, flow rate 1.0 mL/min, room temperature,  $t_R$  (major) = 29.55 min,  $t_R$  (minor) = 16.64 min.

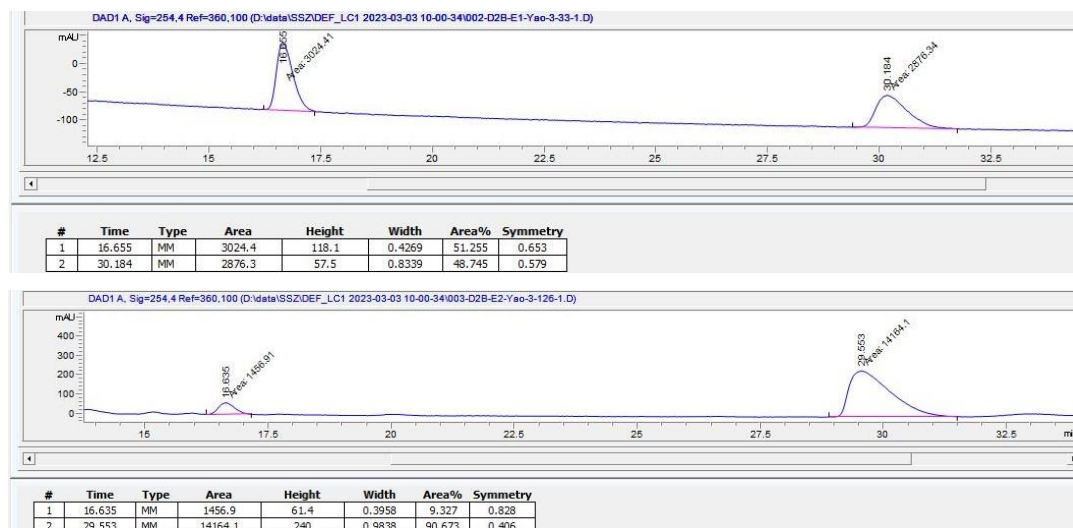

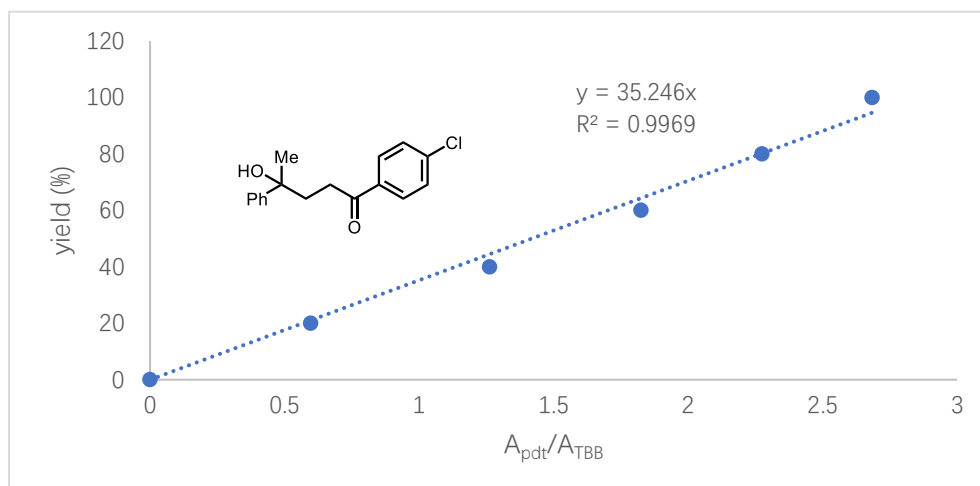

Enzymatic reaction was conducted according to the general procedure for hydroxylation reaction in vials using prop-1-en-2-ylbenzene (**1a**) and 2-bromo-1-(4-chlorophenyl)ethan-1-one (**2c**) as the starting materials.

**Yield:** 47%.

**Enantioselectivity:** 94:6 er. Chiral HPLC method: IA-H column, 254 nm, 5% isopropanol/hexanes, flow rate 1.0 mL/min, room temperature,  $t_R$  (major) = 20.21 min,  $t_R$  (minor) = 21.72 min.

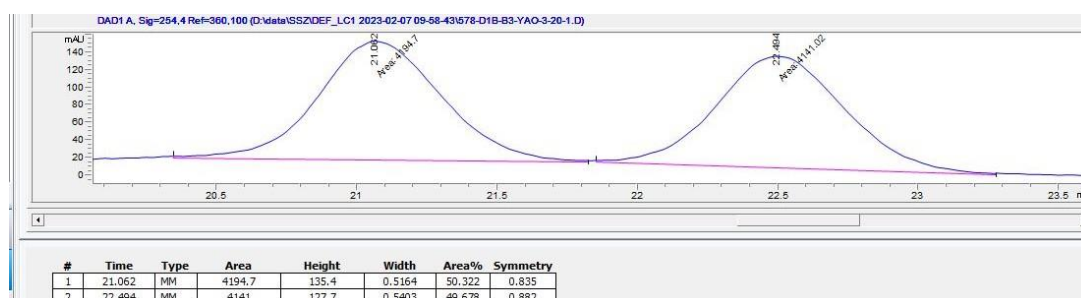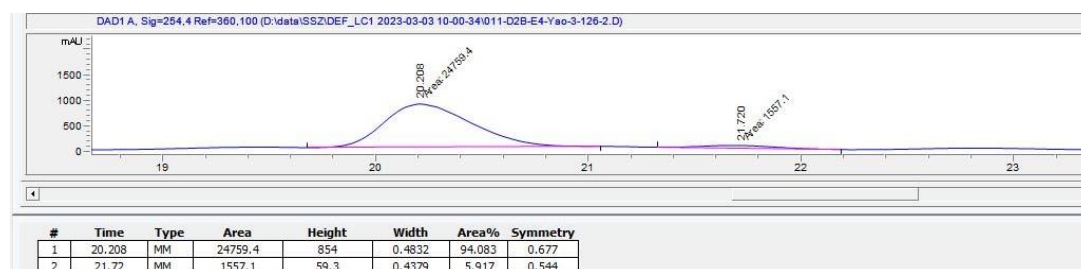



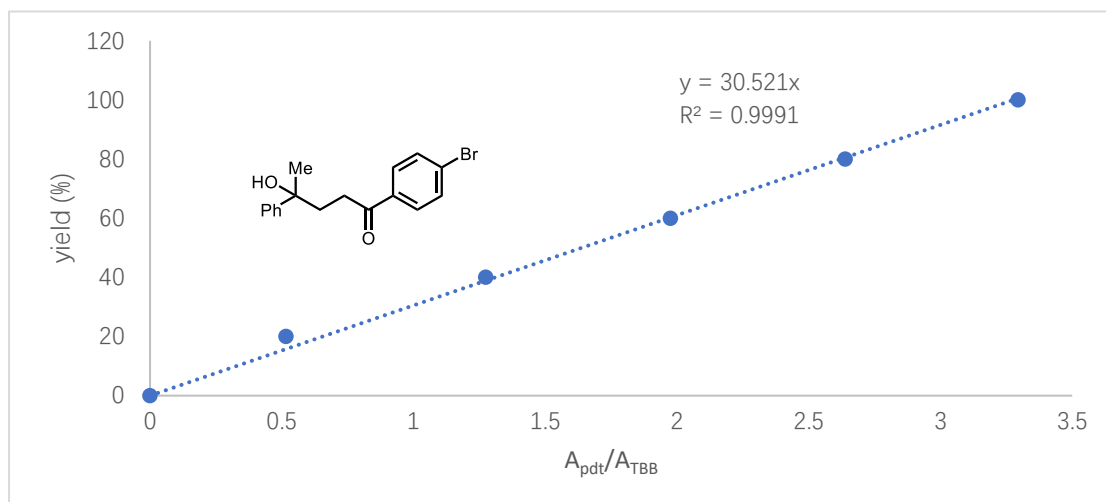

Enzymatic reaction was conducted according to the general procedure for hydroxylation reaction in vials using prop-1-en-2-ylbenzene (**1a**) and 2-bromo-1-(4-bromophenyl)ethan-1-one (**2d**) as the starting materials.

**Yield:** 46% (1.5 mol% S34Q)

**Enantioselectivity:** 91:9 er. Chiral HPLC method: IC-H column, 254 nm, 4% isopropanol/hexanes, flow rate 1.0 mL/min, room temperature,  $t_R$  (major) = 17.57 min,  $t_R$  (minor) = 26.75 min.

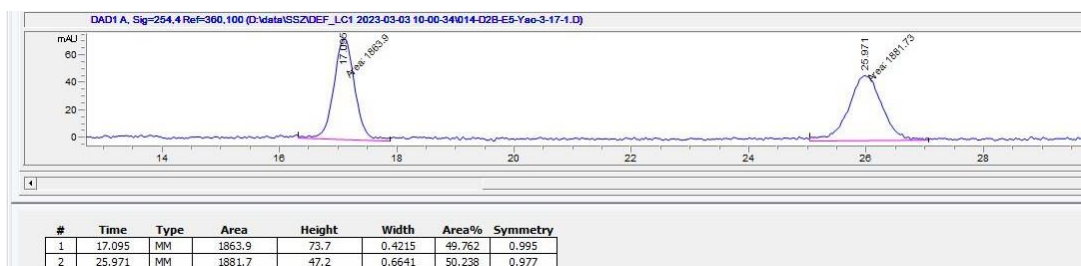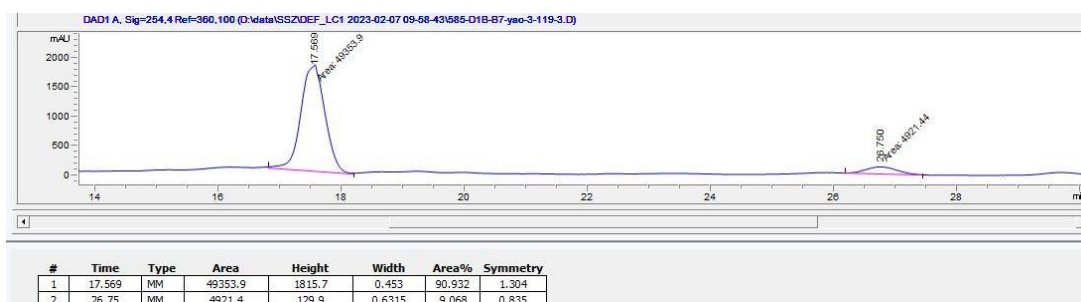

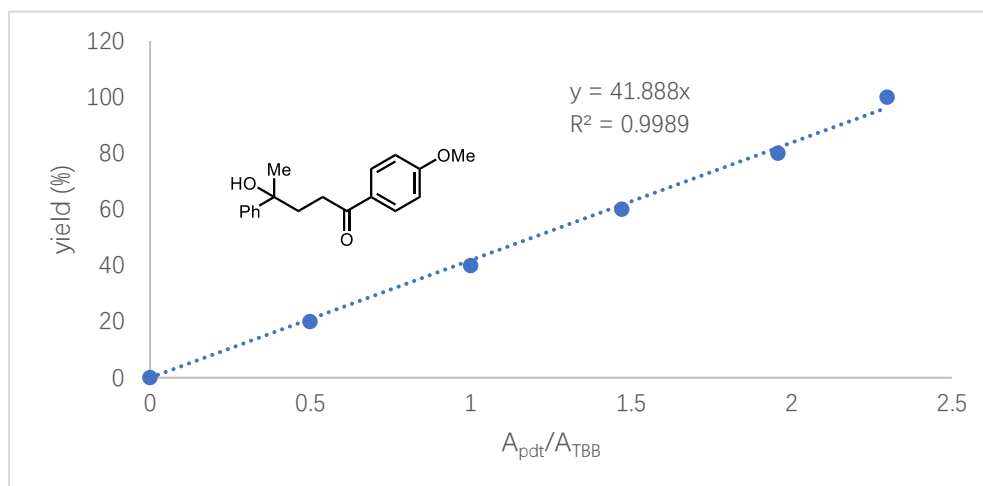

Enzymatic reaction was conducted according to the general procedure for hydroxylation reaction in vials using prop-1-en-2-ylbenzene (**1a**) and 2-bromo-1-(4-methoxyphenyl)ethan-1-one (**2e**) as the starting materials.

**Yield:** 73%.

**Enantioselectivity:** 94:6 er. Chiral HPLC method: OJ-H column, 254 nm, 15% isopropanol/hexanes, flow rate 1.0 mL/min, room temperature,  $t_R$  (major) = 21.63 min,  $t_R$  (minor) = 16.25 min.

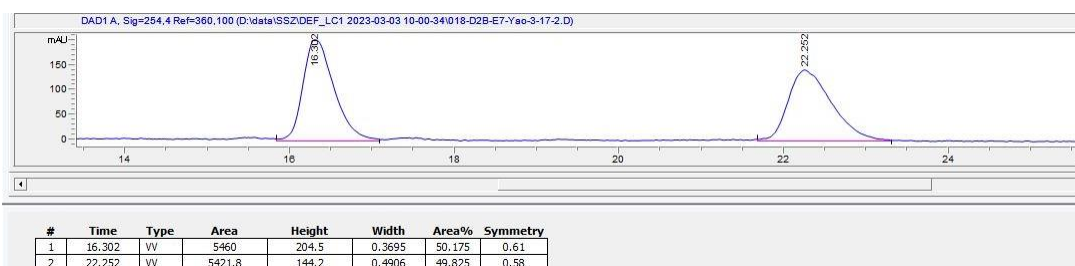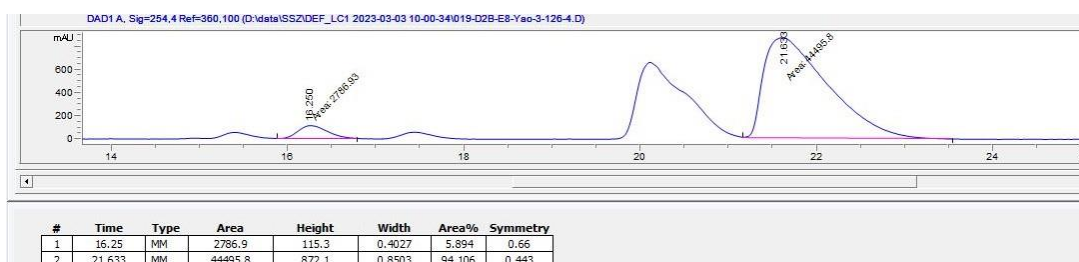

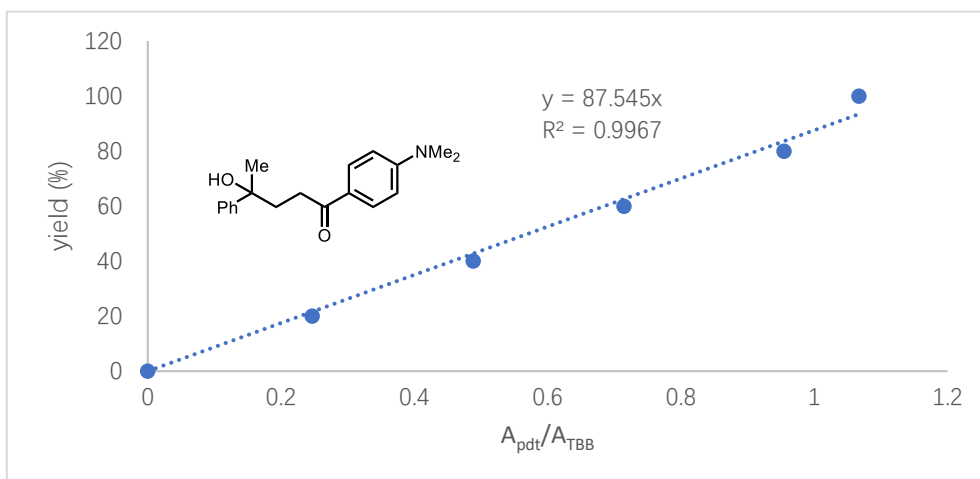

Enzymatic reaction was conducted according to the general procedure for hydroxylation reaction in vials using prop-1-en-2-ylbenzene (**1a**) and 2-bromo-1-(4-(dimethylamino)phenyl)ethan-1-one (**2f**) as the starting materials.

**Yield:** 79%.

**Enantioselectivity:** 95:5 er. Chiral HPLC method: OD-H column, 254 nm, 15% isopropanol/hexanes, flow rate 1.0 mL/min, room temperature,  $t_R$  (major) = 18.39 min,  $t_R$  (minor) = 13.40 min.

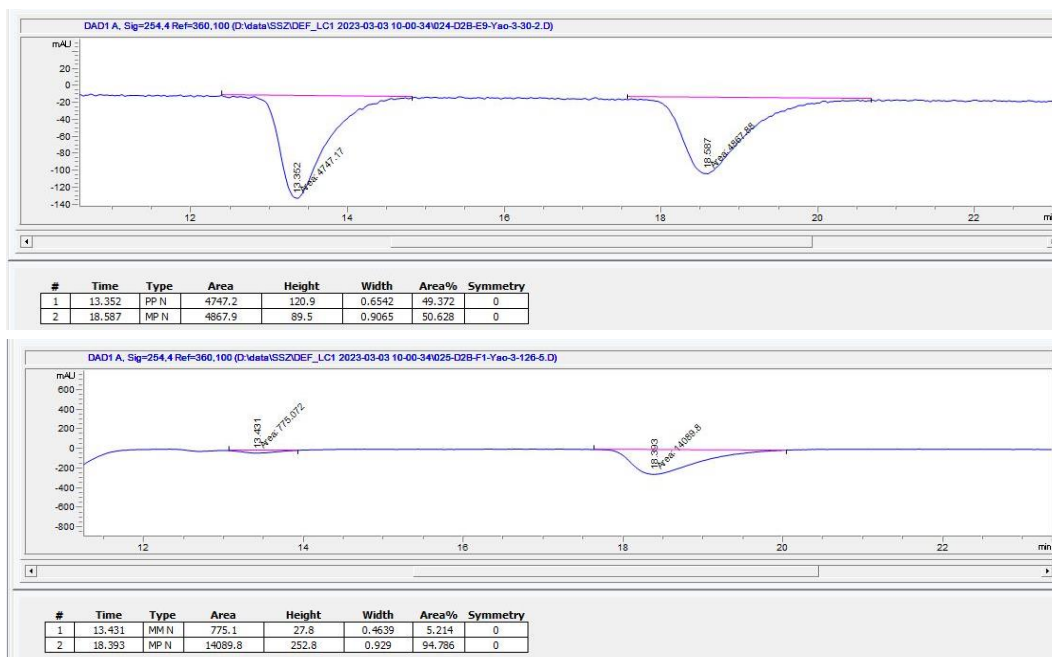

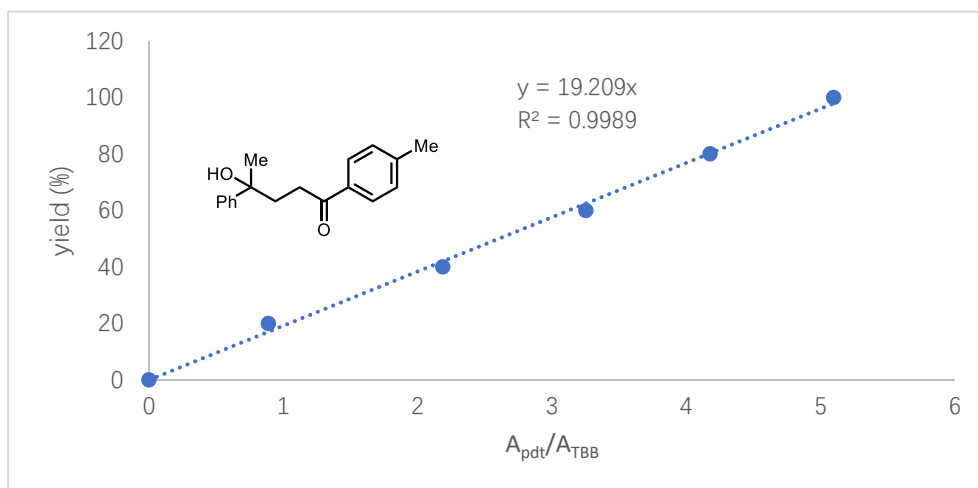

Enzymatic reaction was conducted according to the general procedure for hydroxylation reaction in vials using prop-1-en-2-ylbenzene (**1a**) and 2-bromo-1-(p-tolyl)ethan-1-one (**2g**) as the starting materials.

**Yield:** 76%.

**Enantioselectivity:** 94:6 er. Chiral HPLC method: OJ-H column, 220 nm, 7% isopropanol/hexanes, flow rate 1.0 mL/min, room temperature,  $t_R$  (major) = 17.94 min,  $t_R$  (minor) = 15.22 min.

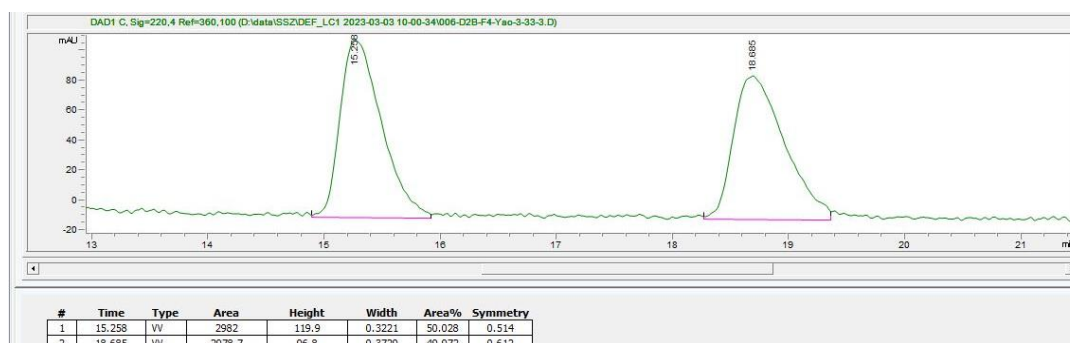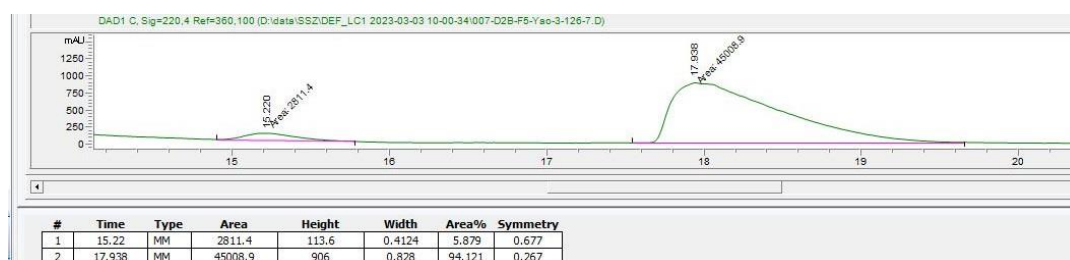

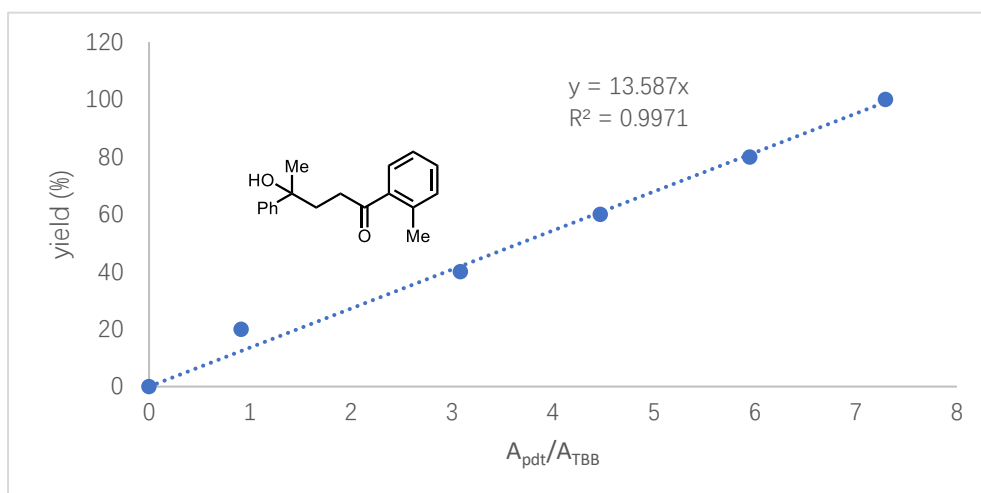

Enzymatic reaction was conducted according to the general procedure for hydroxylation reaction in vials using prop-1-en-2-ylbenzene (**1a**) and 2-bromo-1-(o-tolyl)ethan-1-one (**2h**) as the starting materials.

**Yield:** 14%.

**Enantioselectivity:** 83:17 er. Chiral HPLC method: IC-H column, 210 nm, 4% isopropanol/hexanes, flow rate 1.0 mL/min, room temperature,  $t_R$  (major) = 18.98 min,  $t_R$  (minor) = 12.11 min.

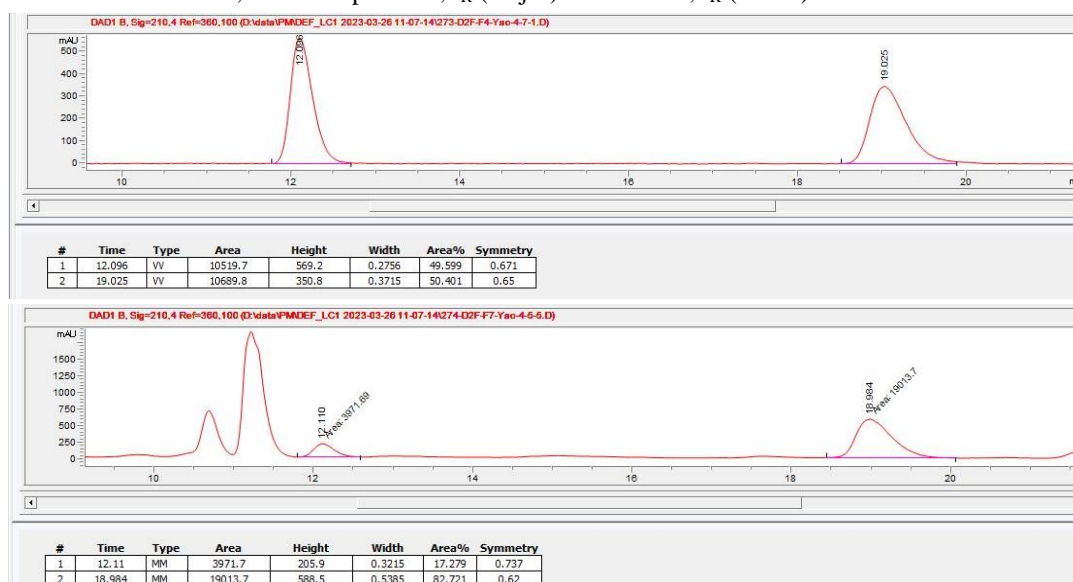

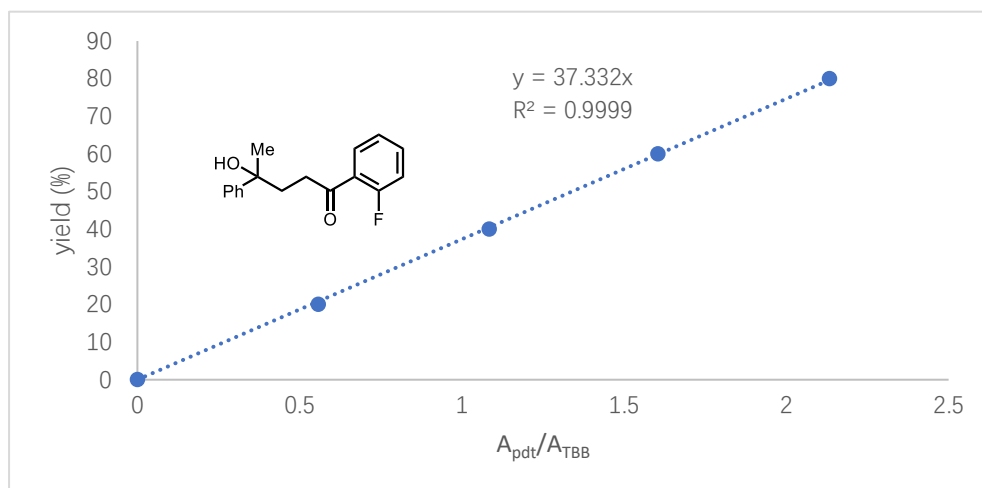

Enzymatic reaction was conducted according to the general procedure for hydroxylation reaction in vials using prop-1-en-2-ylbenzene (**1a**) and 2-bromo-1-(2-fluorophenyl)ethan-1-one (**2i**) as the starting materials.

**Yield:** 56%.

**Enantioselectivity:** 91:9 er. Chiral HPLC method: IC-H column, 210 nm, 4% isopropanol/hexanes, flow rate 1.0 mL/min, room temperature,  $t_R$  (major) = 23.77 min,  $t_R$  (minor) = 32.23 min.

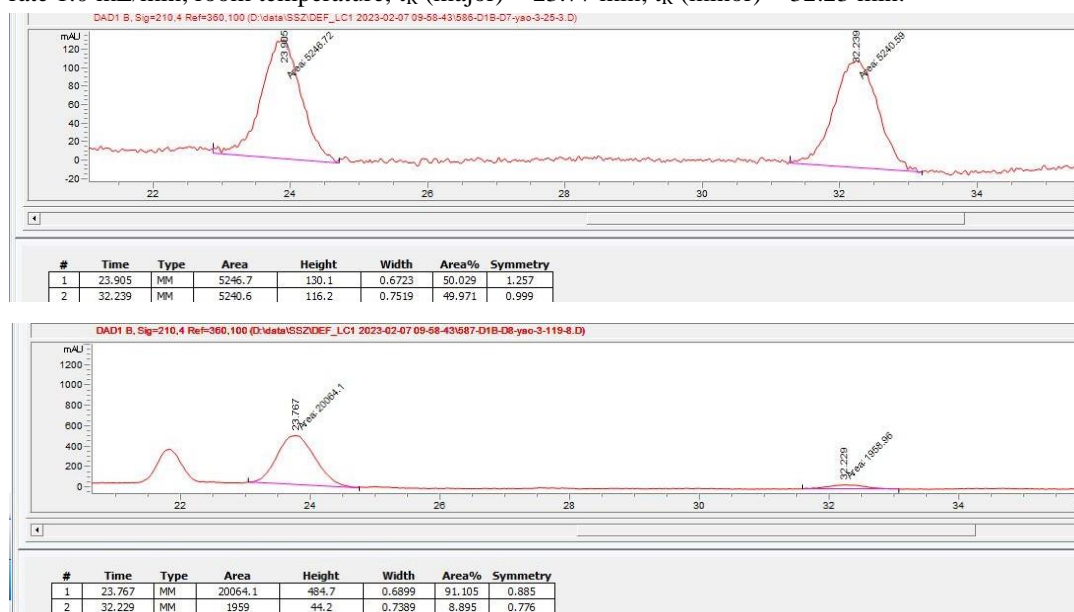

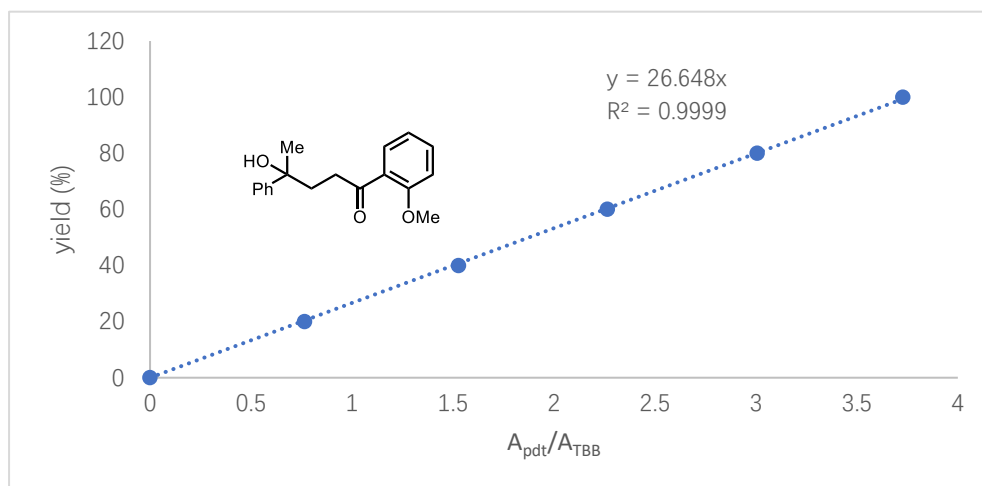

Enzymatic reaction was conducted according to the general procedure for hydroxylation reaction in vials using prop-1-en-2-ylbenzene (**1a**) and 2-bromo-1-(2-methoxyphenyl)ethan-1-one (**2j**) as the starting materials.

**Yield:** 71%.

**Enantioselectivity:** 76:24 er. Chiral HPLC method: OJ-H column, 220 nm, 15% isopropanol/hexanes, flow rate 1.0 mL/min, room temperature,  $t_R$  (major) = 24.45 min,  $t_R$  (minor) = 14.26 min.

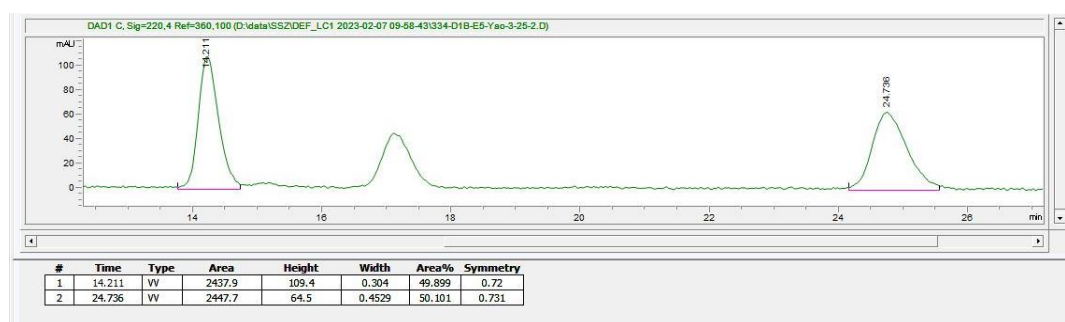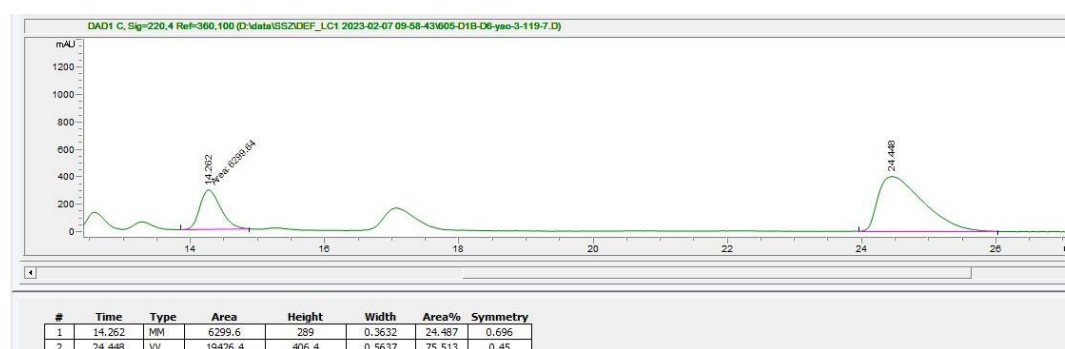

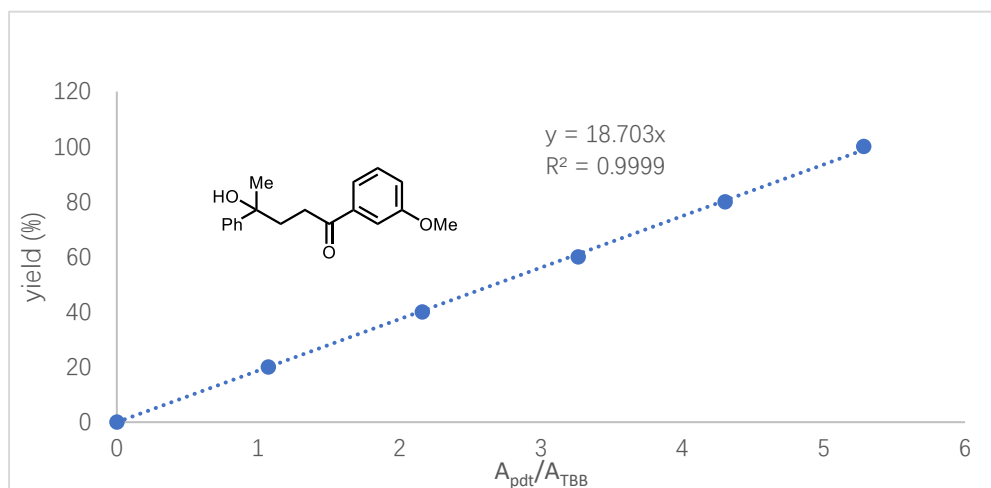

Enzymatic reaction was conducted according to the general procedure for hydroxylation reaction in vials using prop-1-en-2-ylbenzene (**1a**) and 2-bromo-1-(3-methoxyphenyl)ethan-1-one (**2k**) as the starting materials.

**Yield:** 49%.

**Enantioselectivity:** 90:10 er. Chiral HPLC method: OJ-H column, 220 nm, 10% isopropanol/hexanes, flow rate 1.0 mL/min, room temperature,  $t_R$  (major) = 33.63 min,  $t_R$  (minor) = 21.36 min.

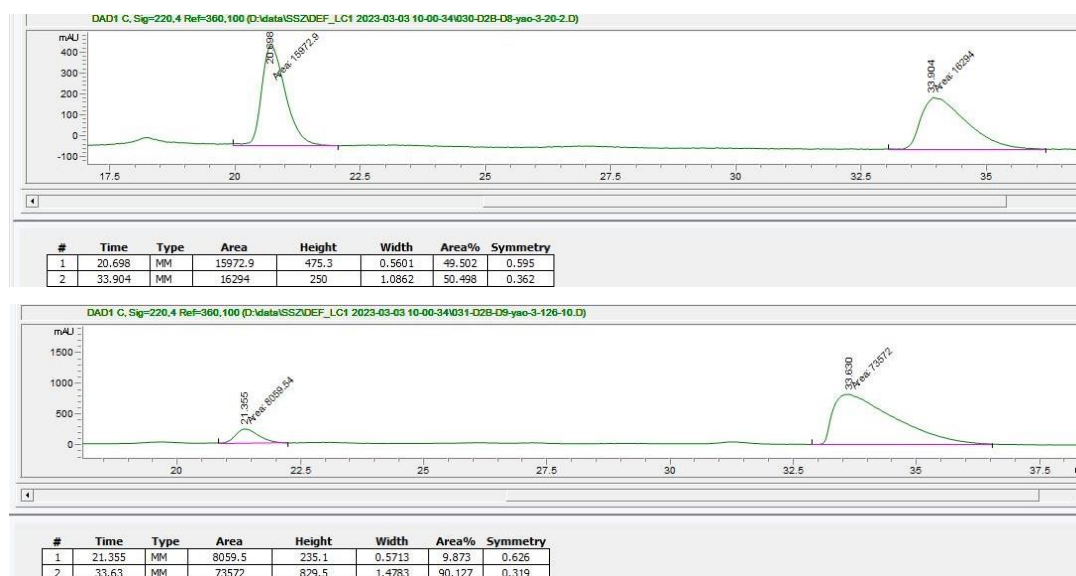



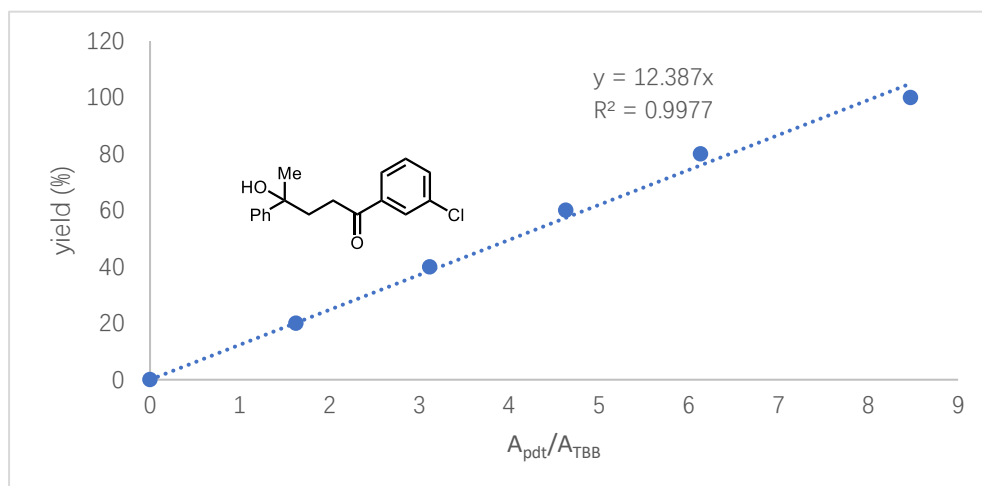

Enzymatic reaction was conducted according to the general procedure for hydroxylation reaction in vials using prop-1-en-2-ylbenzene (**1a**) and 2-bromo-1-(3-chlorophenyl)ethan-1-one (**2l**) as the starting materials.

**Yield:** 25%.

**Enantioselectivity:** 90:10 er. Chiral HPLC method: OJ-H column, 254 nm, 10% isopropanol/hexanes, flow rate 1.0 mL/min, room temperature,  $t_R$  (major) = 17.41 min,  $t_R$  (minor) = 11.52 min.

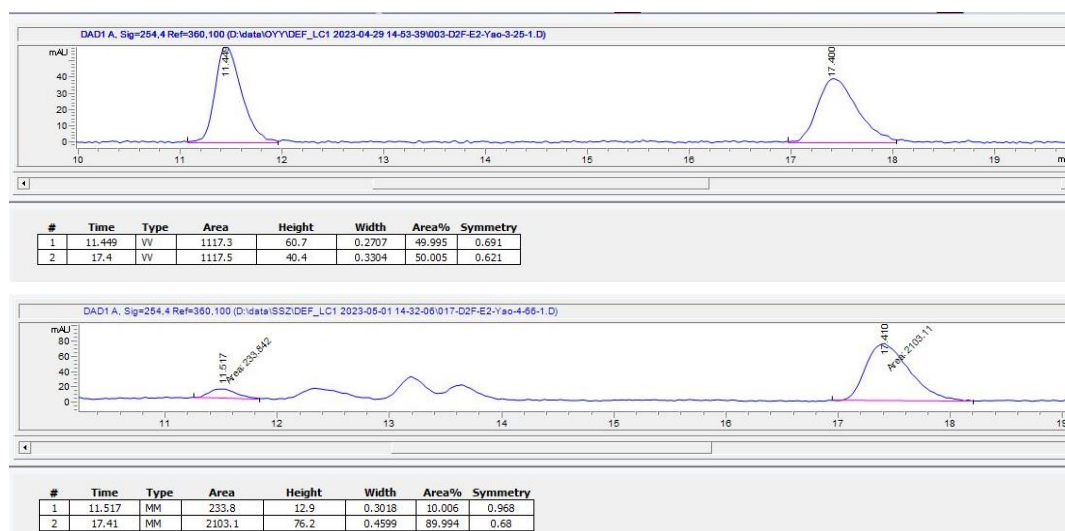

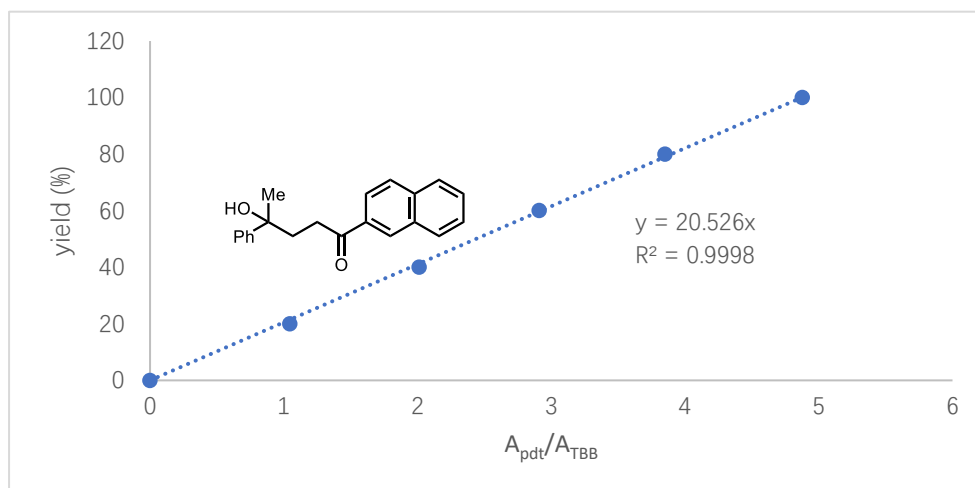

Enzymatic reaction was conducted according to the general procedure for hydroxylation reaction in vials using prop-1-en-2-ylbenzene (**1a**) and 2-bromo-1-(naphthalen-2-yl)ethan-1-one (**2m**) as the starting materials.

**Yield:** 26% (1.5 mol% S34Q).

**Enantioselectivity:** 94:6 er. Chiral HPLC method: OJ-H column, 254 nm, 20% isopropanol/hexanes, flow rate 1.0 mL/min, room temperature,  $t_R$  (major) = 22.84 min,  $t_R$  (minor) = 14.51 min.

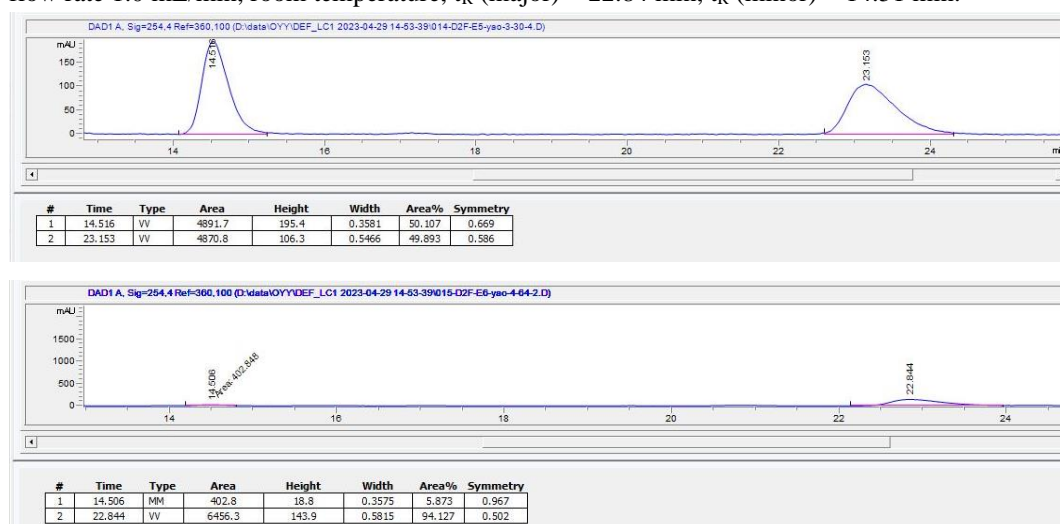

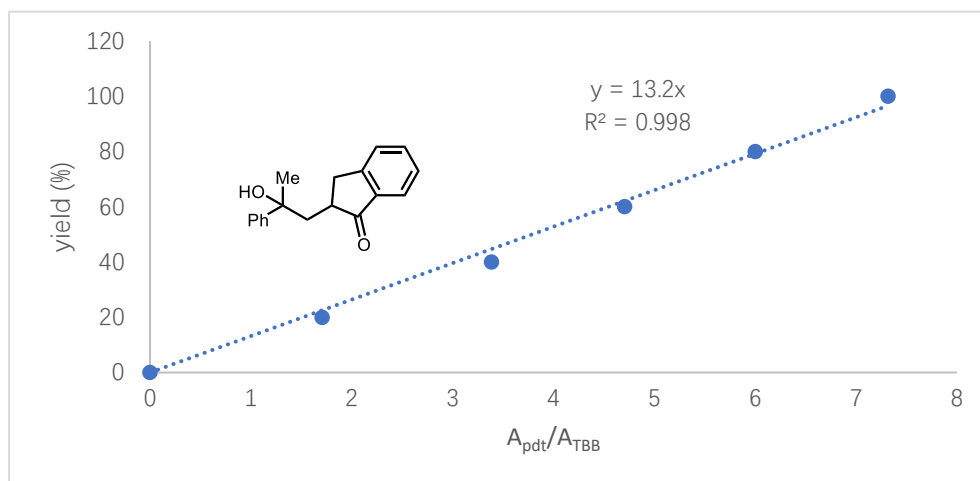

Enzymatic reaction was conducted according to the general procedure for hydroxylation reaction in vials using prop-1-en-2-ylbenzene (**1a**) and 2-(2-bromoacetyl)-2,3-dihydro-1H-inden-1-one (**2n**) as the starting materials.

**Yield:** 15%, d.r. 1.4:1 based on the HPLC ratio.

**Enantioselectivity:** 89:11 er and 56:44 er. Chiral HPLC method: AS-H column, 220 nm, 7% isopropanol/hexanes, flow rate 1.0 mL/min, room temperature, major isomer:  $t_R$  (major) = 12.01 min,  $t_R$  (minor) = 9.65 min. Minor isomer:  $t_R$ (major) = 16.28 min,  $t_R$  (minor) = 28.59 min.

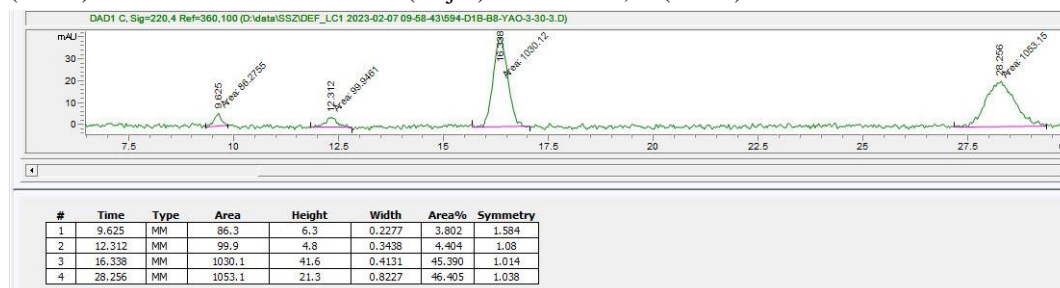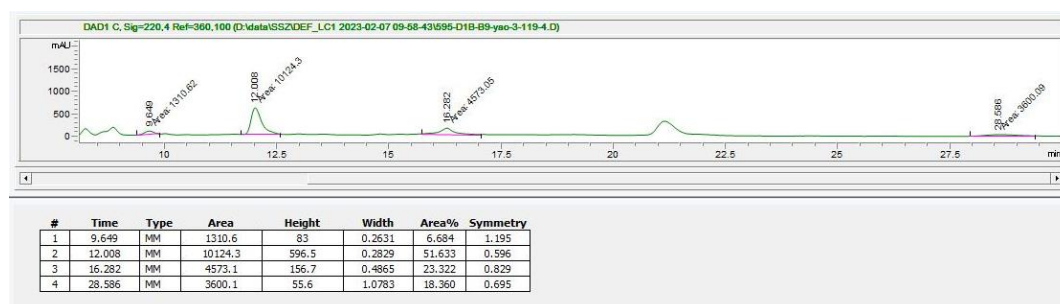

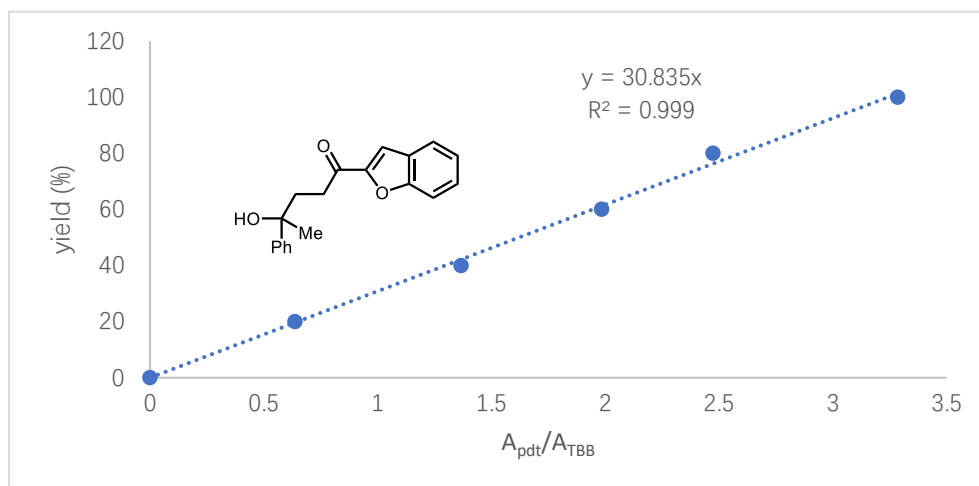

Enzymatic reaction was conducted according to the general procedure for hydroxylation reaction in vials using prop-1-en-2-ylbenzene (**1a**) and 1-(benzofuran-2-yl)-2-bromoethan-1-one (**2o**) as the starting materials.

**Yield:** 22% (1.5 mol% S34Q).

**Enantioselectivity:** 83:17 er. Chiral HPLC method: OJ-H column, 210 nm, 20% isopropanol/hexanes, flow rate 1.0 mL/min, room temperature,  $t_R$  (major) = 24.76 min,  $t_R$  (minor) = 13.40 min.

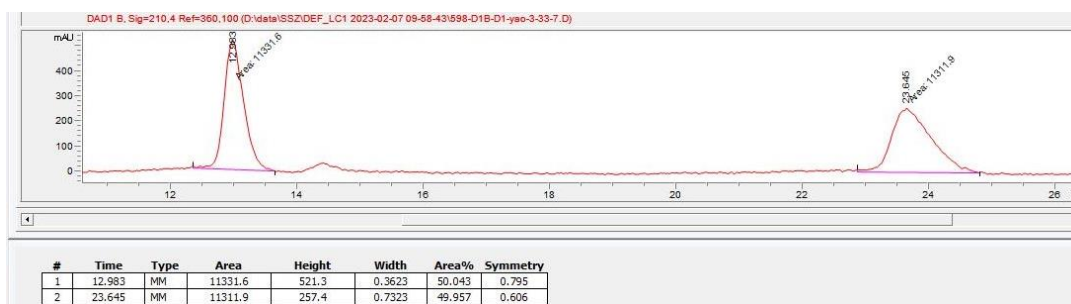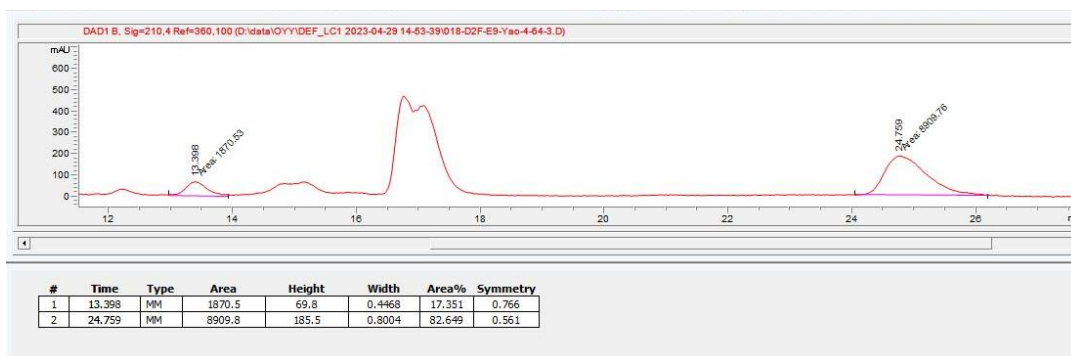

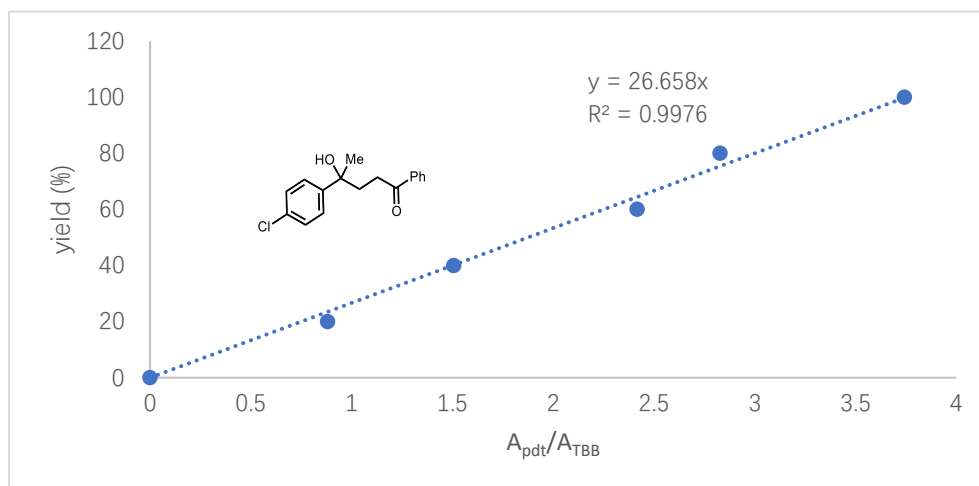

Enzymatic reaction was conducted according to the general procedure for hydroxylation reaction in vials using 1-chloro-4-(prop-1-en-2-yl)benzene (**1b**) and 2-bromo-1-phenylethan-1-one (**2a**) as the starting materials.

**Yield:** 70% (1.5 mol% S34Q).

**Enantioselectivity:** 94:6 er. Chiral HPLC method: OJ-H column, 220 nm, 10% isopropanol/hexanes, flow rate 1.0 mL/min, room temperature,  $t_R$  (major) = 19.43 min,  $t_R$  (minor) = 26.13 min.

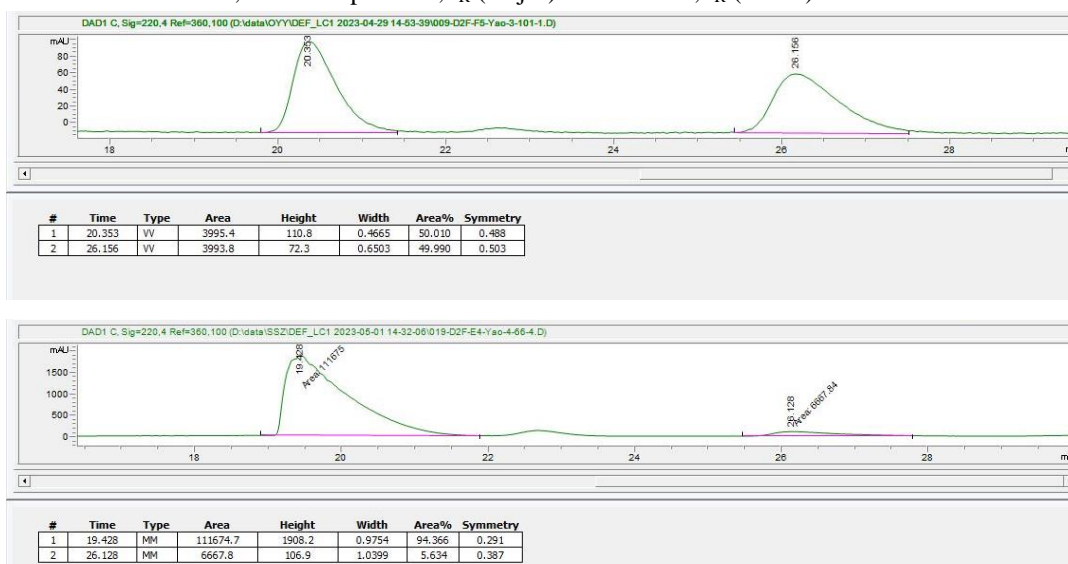

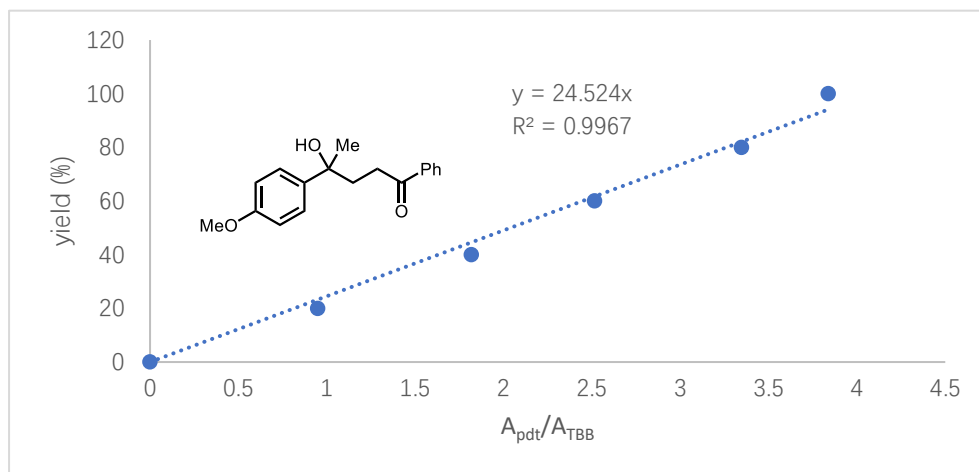

Enzymatic reaction was conducted according to the general procedure for hydroxylation reaction in vials using 1-methoxy-4-(prop-1-en-2-yl)benzene (**1c**) and 2-bromo-1-phenylethan-1-one (**2a**) as the starting materials.

**Yield:** 76%.

**Enantioselectivity:** 65:35 er. Chiral HPLC method: IC-H column, 254 nm, 4% isopropanol/hexanes, flow rate 1.0 mL/min, room temperature,  $t_R$  (major) = 19.96 min,  $t_R$  (minor) = 25.04 min.

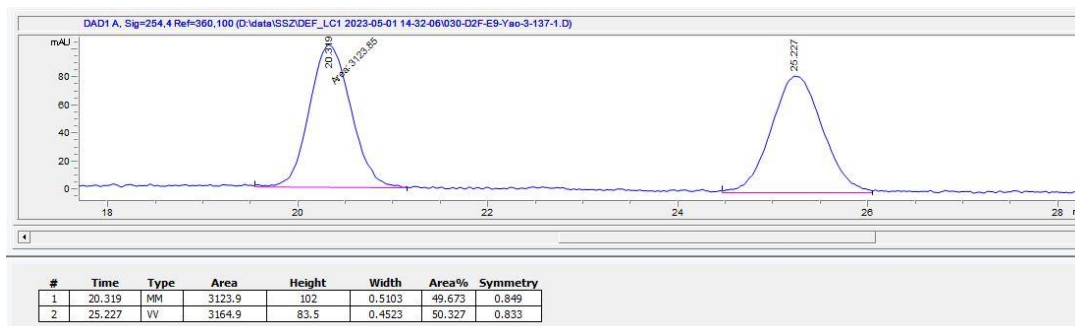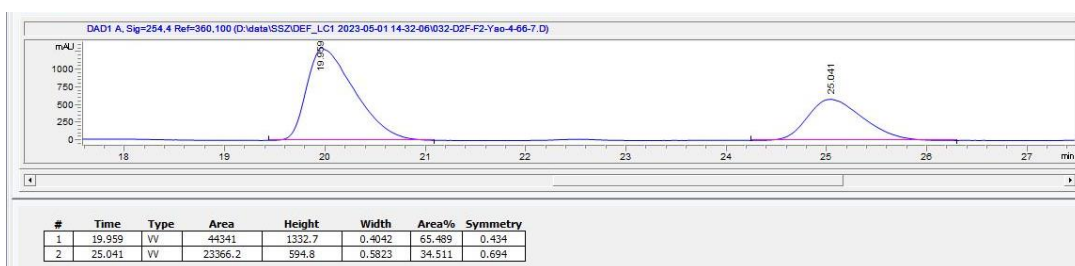

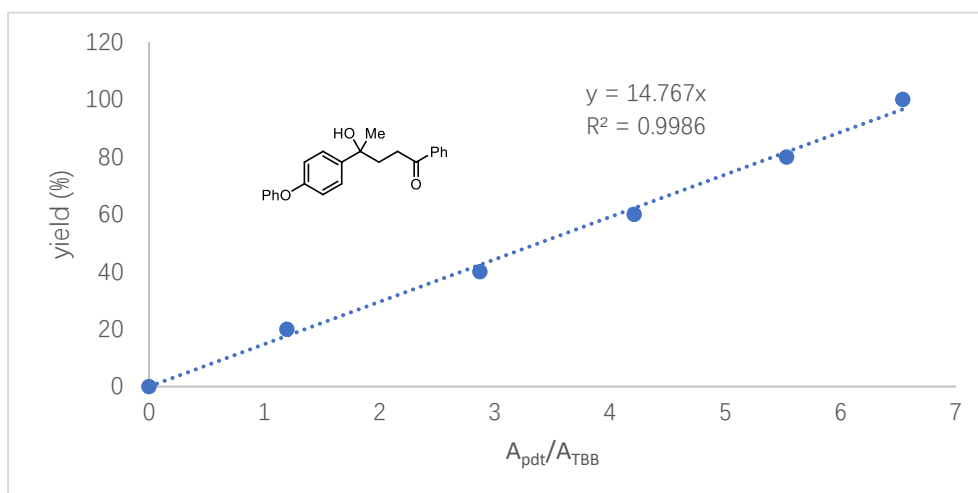

Enzymatic reaction was conducted according to the general procedure for hydroxylation reaction in vials using 1-phenoxy-4-(prop-1-en-2-yl)benzene (**1d**) and 2-bromo-1-phenylethan-1-one (**2a**) as the starting materials.

**Yield:** 36%.

**Enantioselectivity:** 76:24 er. Chiral HPLC method: AS-H column, 254 nm, 10% isopropanol/hexanes, flow rate 1.0 mL/min, room temperature,  $t_R$  (major) = 15.18 min,  $t_R$  (minor) = 20.89 min.

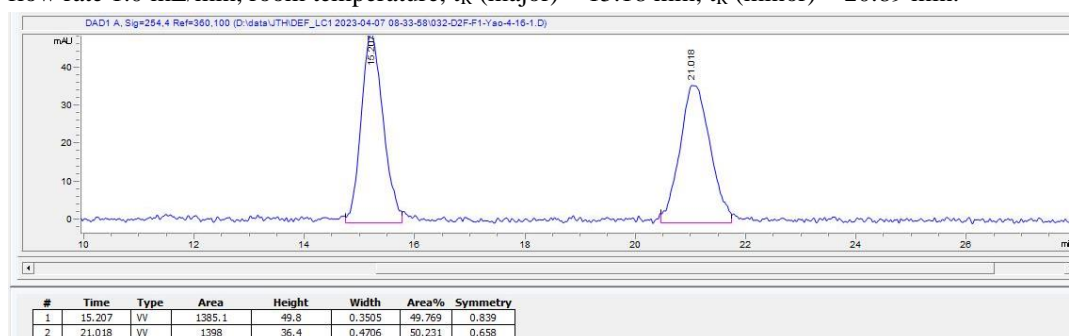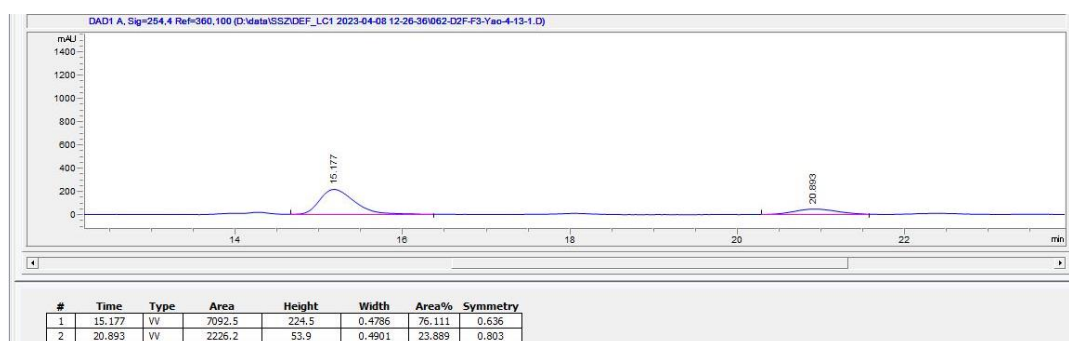

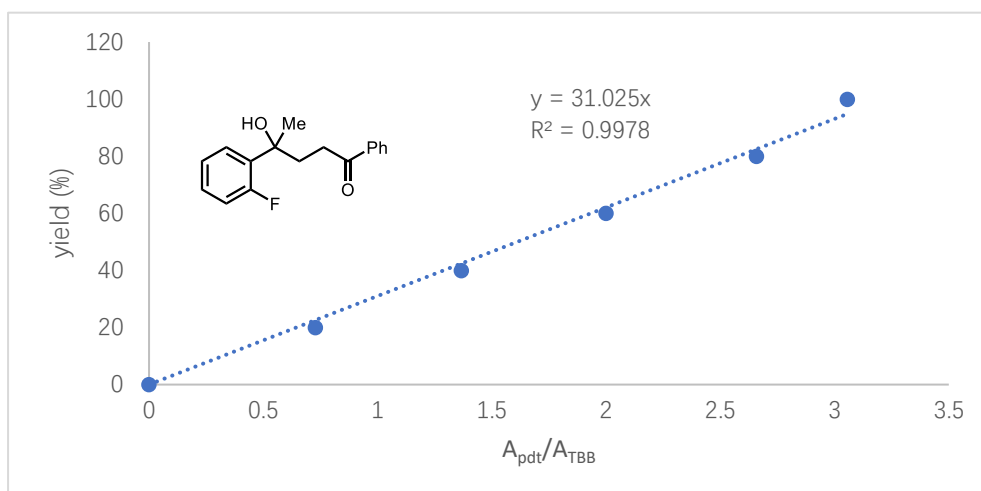

Enzymatic reaction was conducted according to the general procedure for hydroxylation reaction in vials using 1-fluoro-2-(prop-1-en-2-yl)benzene (**1e**) and 2-bromo-1-phenylethan-1-one (**2a**) as the starting materials.

**Yields:** 39%.

**Enantioselectivity:** 96:4 er. Chiral HPLC method: IC-H column, 254 nm, 2% isopropanol/hexanes, flow rate 1.0 mL/min, room temperature,  $t_R$  (major) = 26.56 min,  $t_R$  (minor) = 30.68 min.

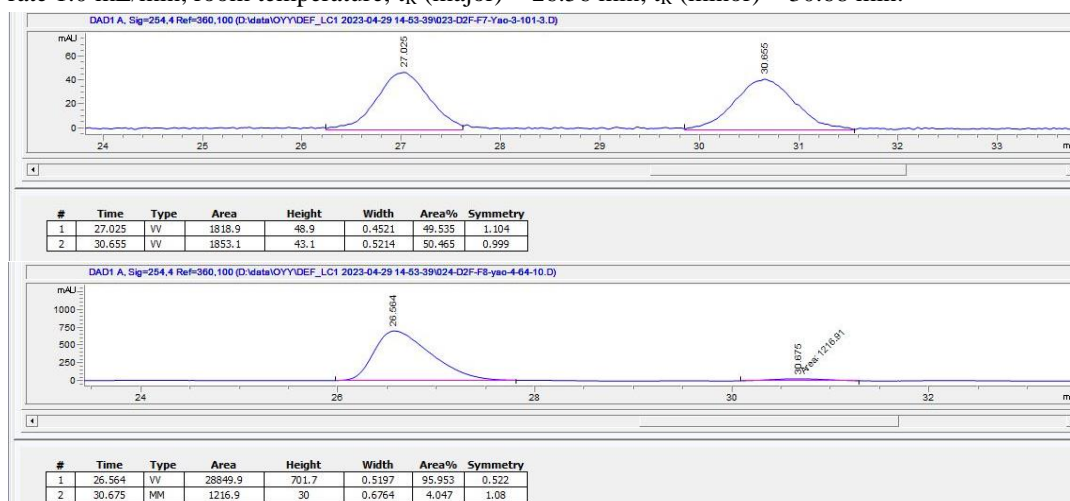



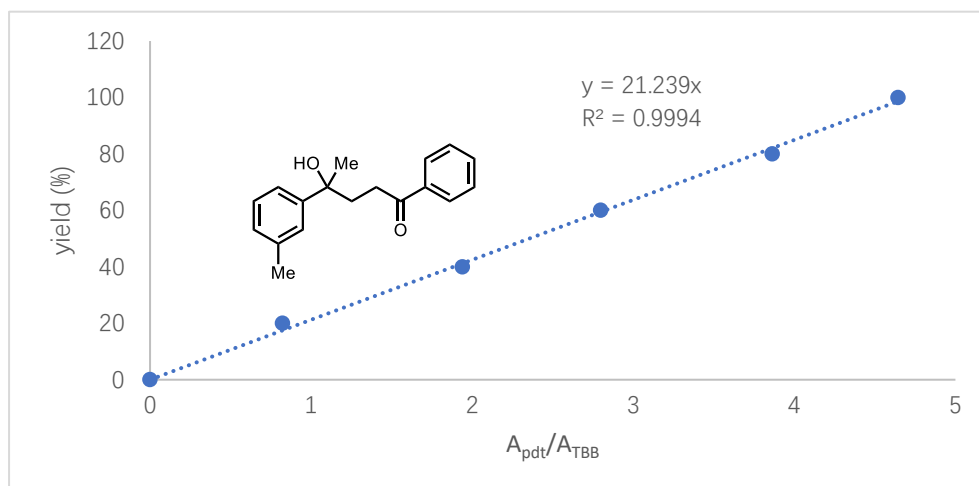

Enzymatic reaction was conducted according to the general procedure for hydroxylation reaction in vials using 1-methyl-3-(prop-1-en-2-yl)benzene (**1f**) and 2-bromo-1-phenylethan-1-one (**2a**) as the starting materials.

**Yields:** 80%.

**Enantioselectivity:** 84:16 er. Chiral HPLC method: IC-H column, 220 nm, 7% isopropanol/hexanes, flow rate 1.0 mL/min, room temperature,  $t_R$  (major) = 14.78 min,  $t_R$  (minor) = 19.43 min.

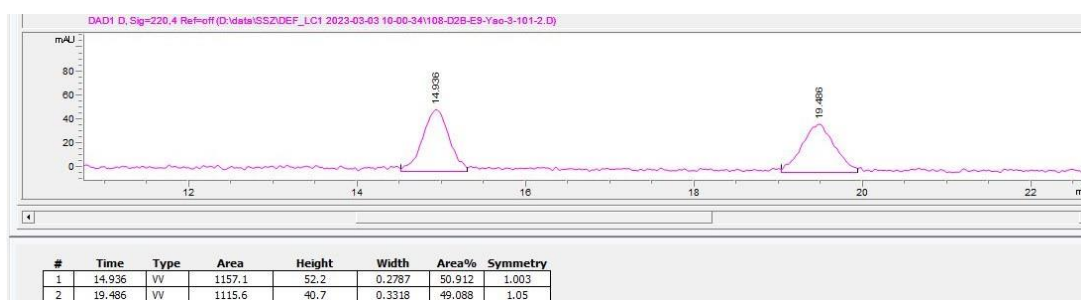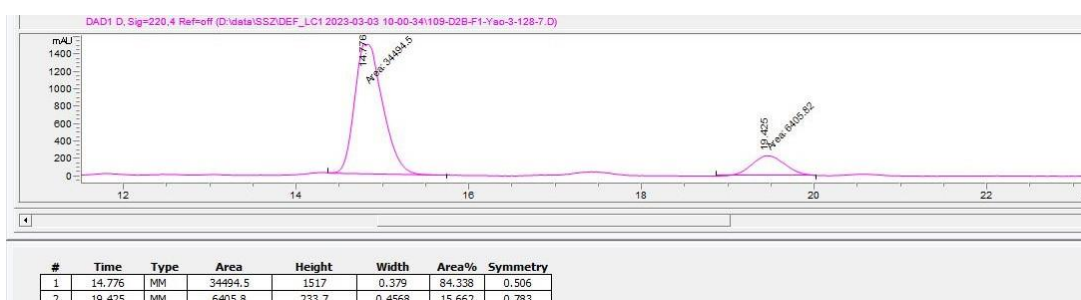

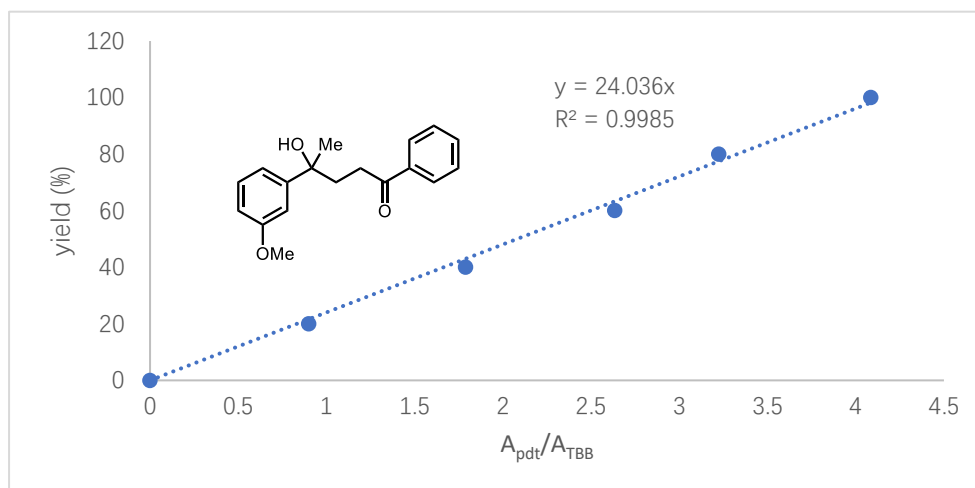

Enzymatic reaction was conducted according to the general procedure for hydroxylation reaction in vials using 1-methoxy-3-(prop-1-en-2-yl)benzene (**1g**) and 2-bromo-1-phenylethan-1-one (**2a**) as the starting materials.

**Yield:** 53%.

**Enantioselectivity:** 89:11 er. Chiral HPLC method: OJ-H column, 254 nm, 10% isopropanol/hexanes, flow rate 1.0 mL/min, room temperature,  $t_R$  (major) = 24.02 min,  $t_R$  (minor) = 18.69 min.

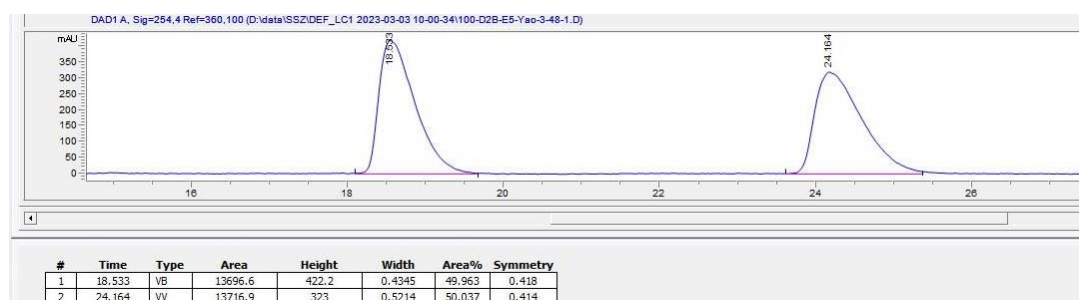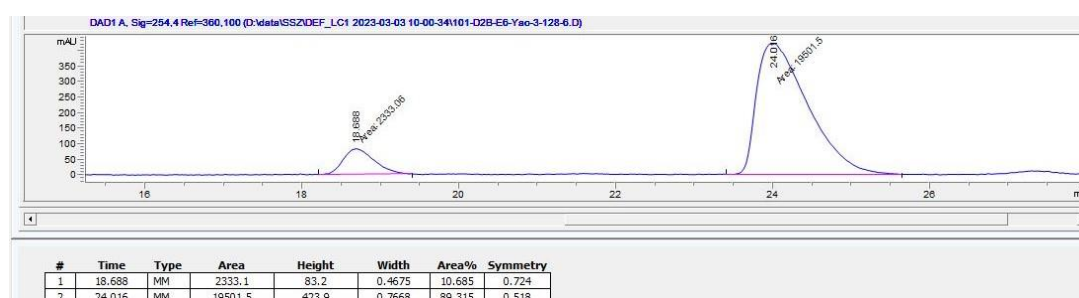

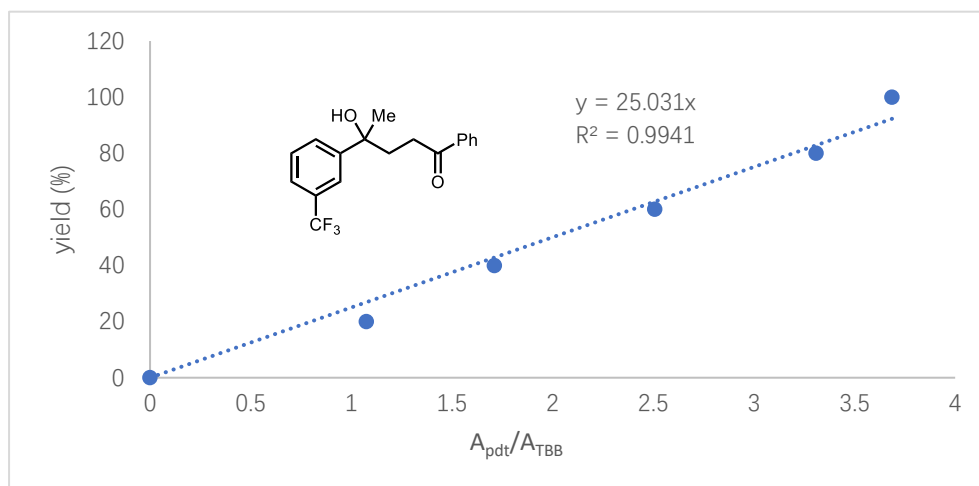

Enzymatic reaction was conducted according to the general procedure for hydroxylation reaction in vials using 1-(prop-1-en-2-yl)-3-(trifluoromethyl)benzene (**1h**) and 2-bromo-1-phenylethan-1-one (**2a**) as the starting materials.

**Yield:** 8%.

**Enantioselectivity:** 76:24 er. Chiral HPLC method: AS-H column, 254 nm, 3% isopropanol/hexanes, flow rate 1.0 mL/min, room temperature,  $t_R$  (major) = 21.98 min,  $t_R$  (minor) = 18.39 min.

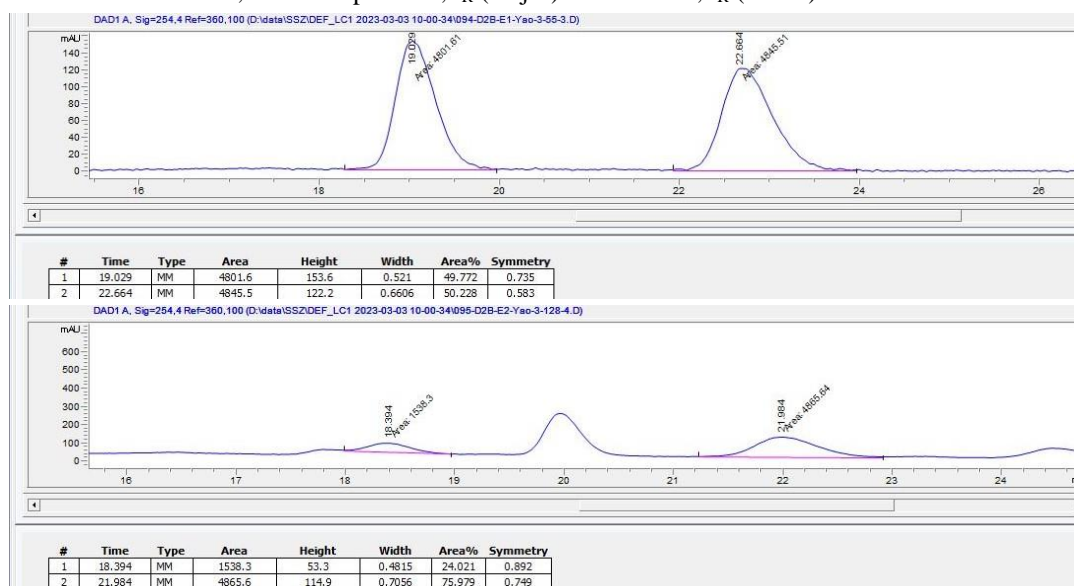

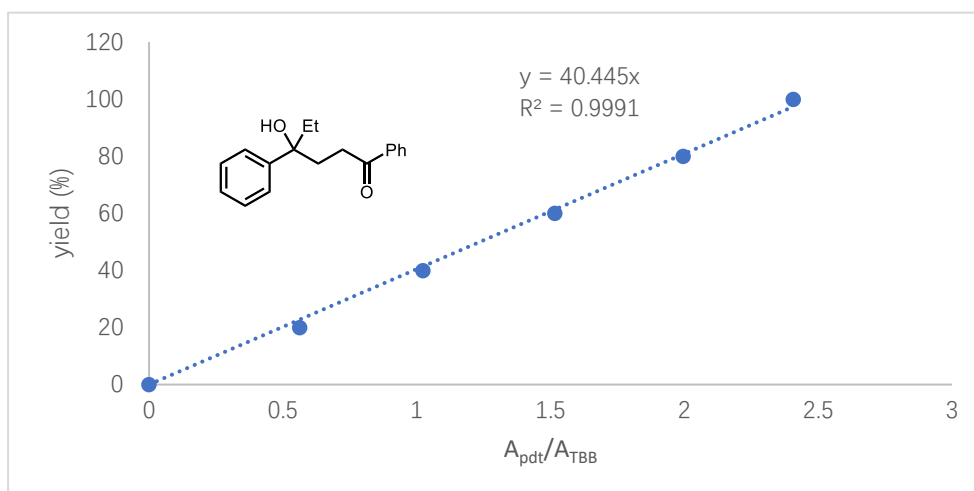

Enzymatic reaction was conducted according to the general procedure for hydroxylation reaction in vials using but-1-en-2-ylbenzene (**1i**) and 2-bromo-1-phenylethan-1-one (**2a**) as the starting materials.

**Yield:** 56%.

**Enantioselectivity:** 84:16 er. Chiral HPLC method: AS-H column, 254 nm, 3% isopropanol/hexanes, flow rate 1.0 mL/min, room temperature,  $t_R$  (major) = 21.52 min,  $t_R$  (minor) = 26.12 min.

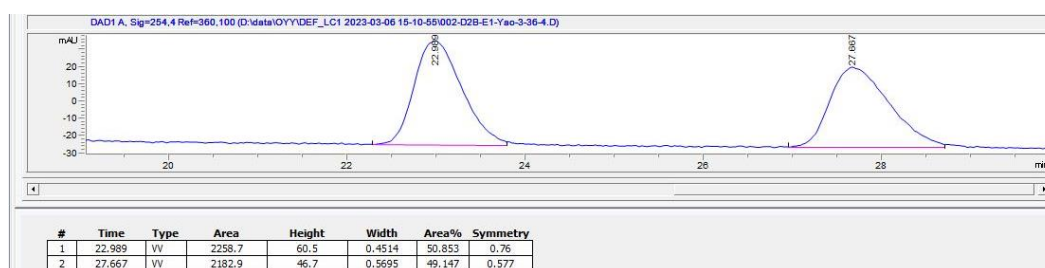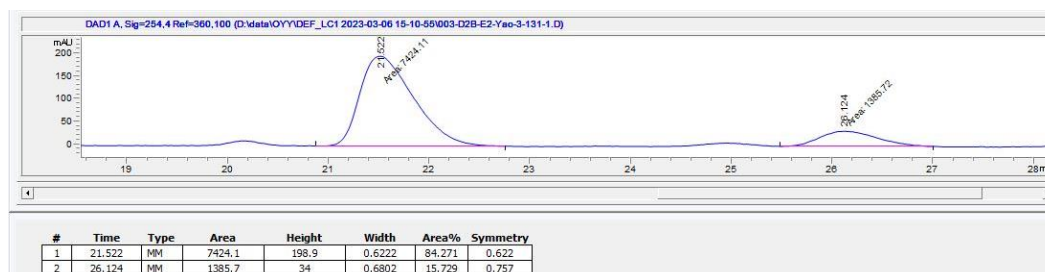

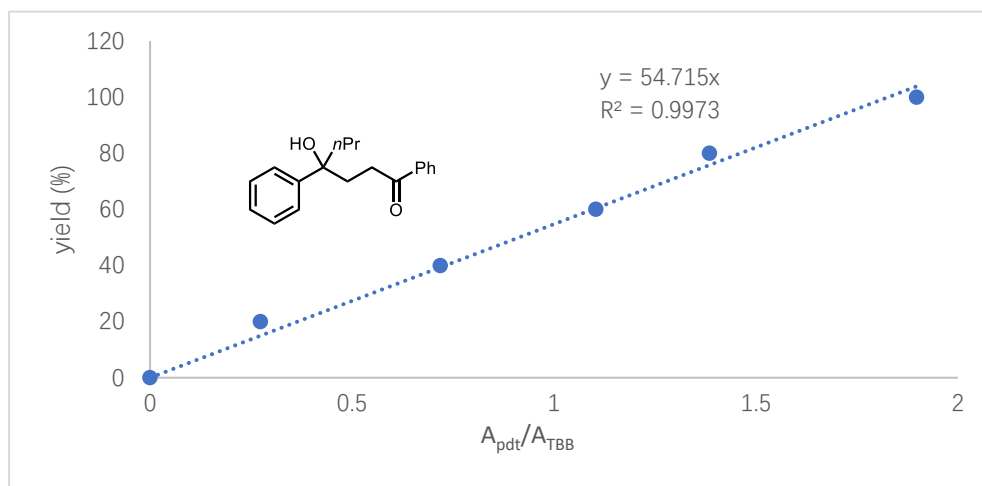

Enzymatic reaction was conducted according to the general procedure for hydroxylation reaction in vials using pent-1-en-2-ylbenzene (**1j**) and 2-bromo-1-phenylethan-1-one (**2a**) as the starting materials.

**Yield:** 33%.

**Enantioselectivity:** 63:37 er. Chiral HPLC method: IC-H column, 210 nm, 5% isopropanol/hexanes, flow rate 1.0 mL/min, room temperature,  $t_R$  (major) = 12.60 min,  $t_R$  (minor) = 15.86 min.

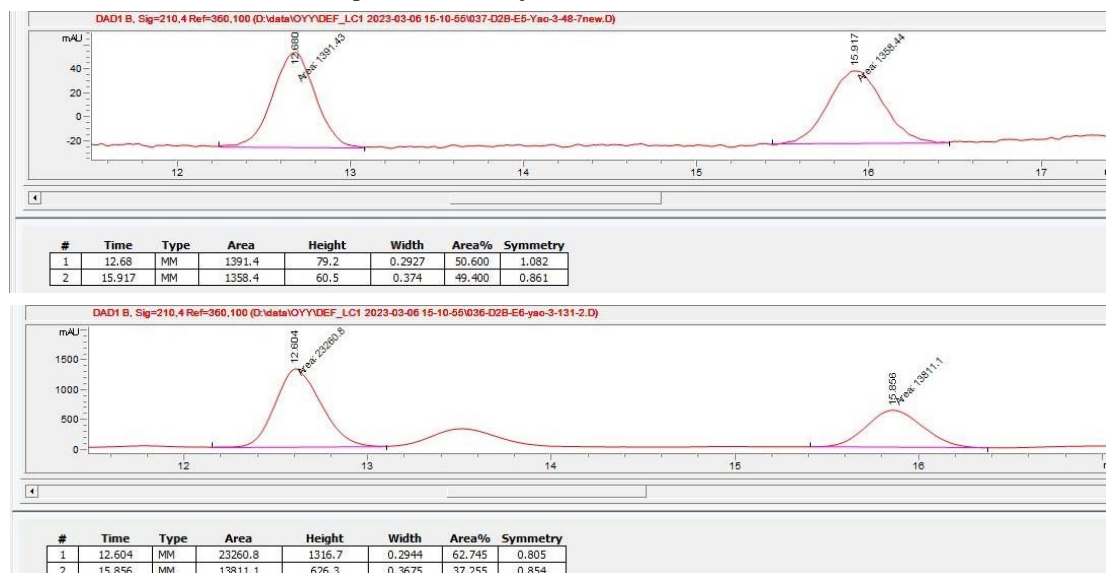

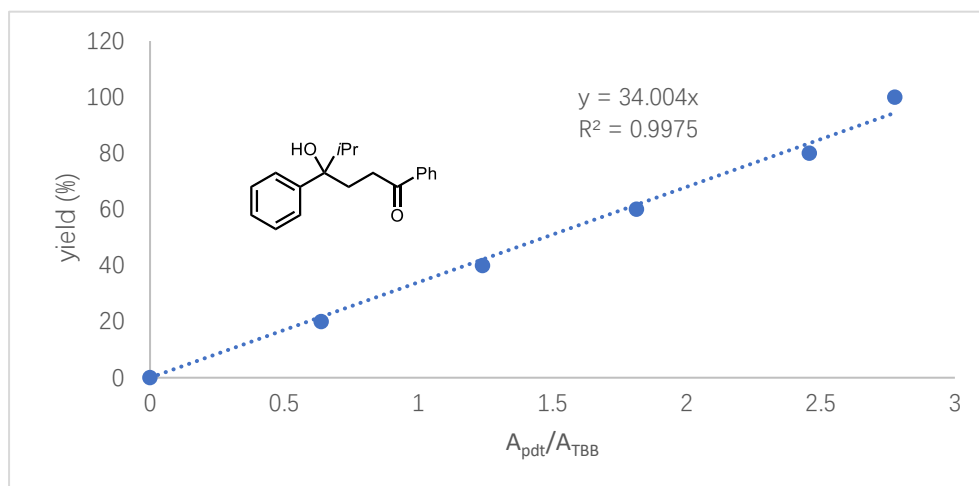

Enzymatic reaction was conducted according to the general procedure for hydroxylation reaction in vials using (3-methylbut-1-en-2-yl)benzene (**1k**) and 2-bromo-1-phenylethan-1-one (**2a**) as the starting materials.

**Yield:** 25%.

**Enantioselectivity:** 60:40 er. Chiral HPLC method: IC-H column, 254 nm, 2% isopropanol/hexanes, flow rate 1.0 mL/min, room temperature,  $t_R$  (major) = 13.23 min,  $t_R$  (minor) = 17.04 min.

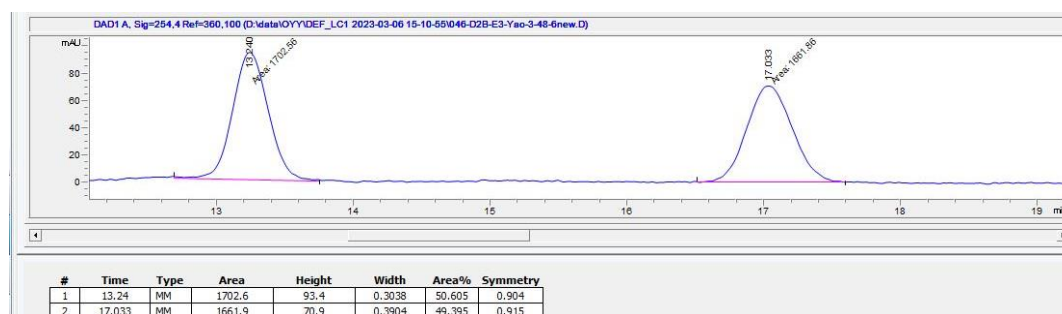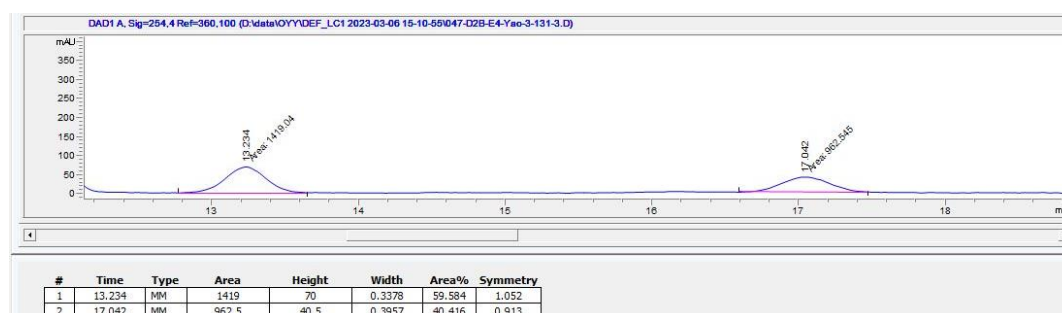

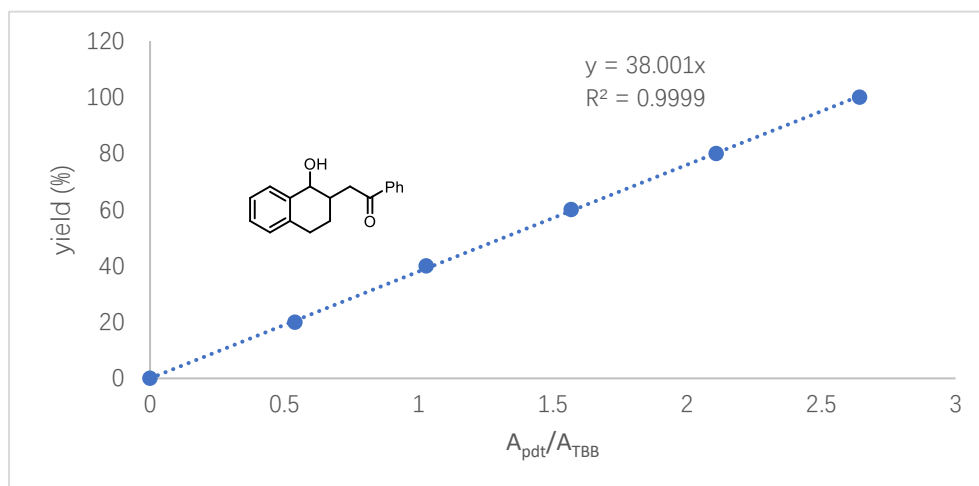

Enzymatic reaction was conducted according to the general procedure for hydroxylation reaction in vials using 1,2-dihydronaphthalene (**1**) and 2-bromo-1-phenylethan-1-one (**2a**) as the starting materials.

**Yield:** 36%, d.r. > 20:1, and the major isomer is determined to be *cis* as confirmed by crude NMR.

**Enantioselectivity:** 86:14 er. Chiral HPLC method: IC-H column, 220 nm, 7% isopropanol/hexanes, flow rate 1.0 mL/min, room temperature,  $t_R$  (major) = 18.79 min,  $t_R$  (minor) = 17.28 min.

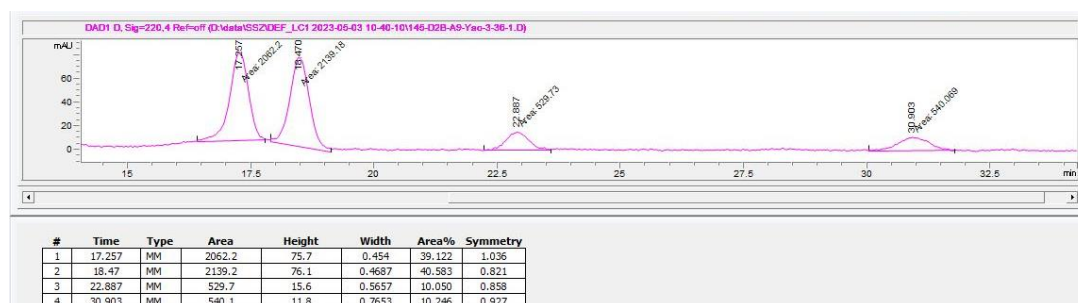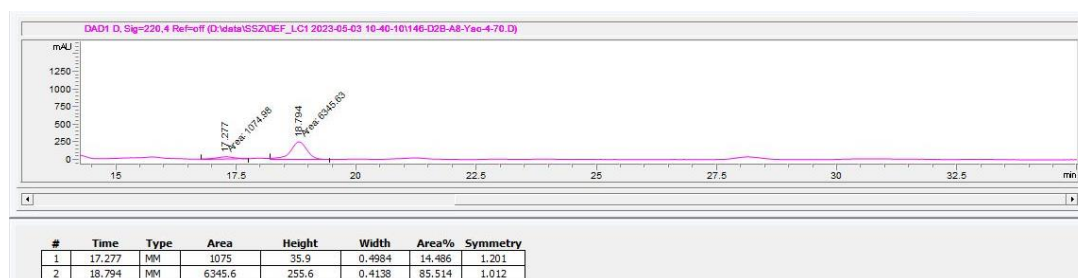

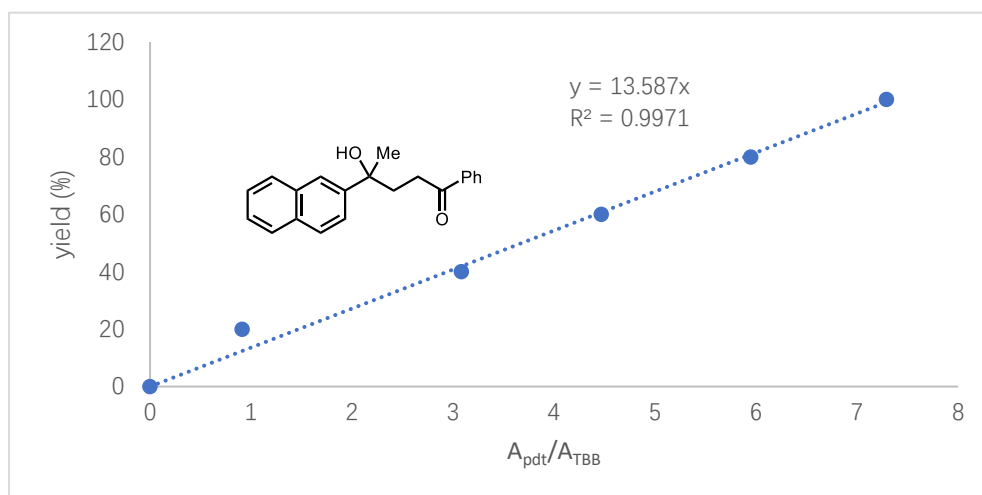

Enzymatic reaction was conducted according to the general procedure for hydroxylation reaction in vials using 2-(prop-1-en-2-yl)naphthalene (**1m**) and 2-bromo-1-phenylethan-1-one (**2a**) as the starting materials.

**Yield:** 52%.

**Enantioselectivity:** 91:9 er. Chiral HPLC method: AS-H column, 254 nm, 10% isopropanol/hexanes, flow rate 1.0 mL/min, room temperature,  $t_R$  (major) = 18.35 min,  $t_R$  (minor) = 14.91 min.

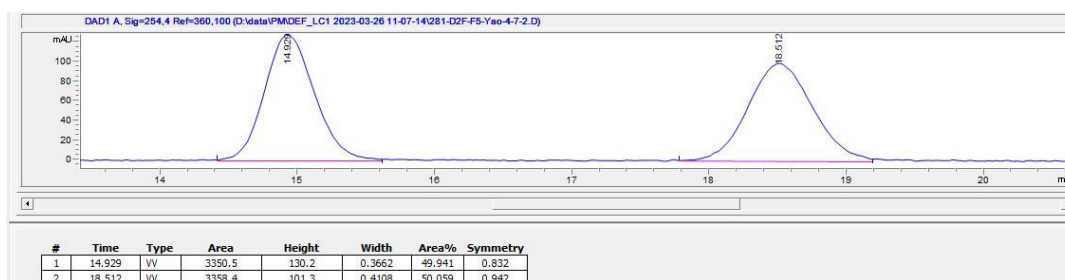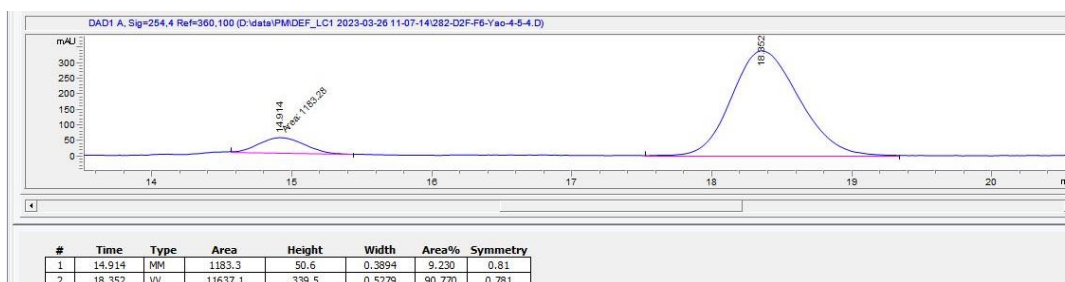



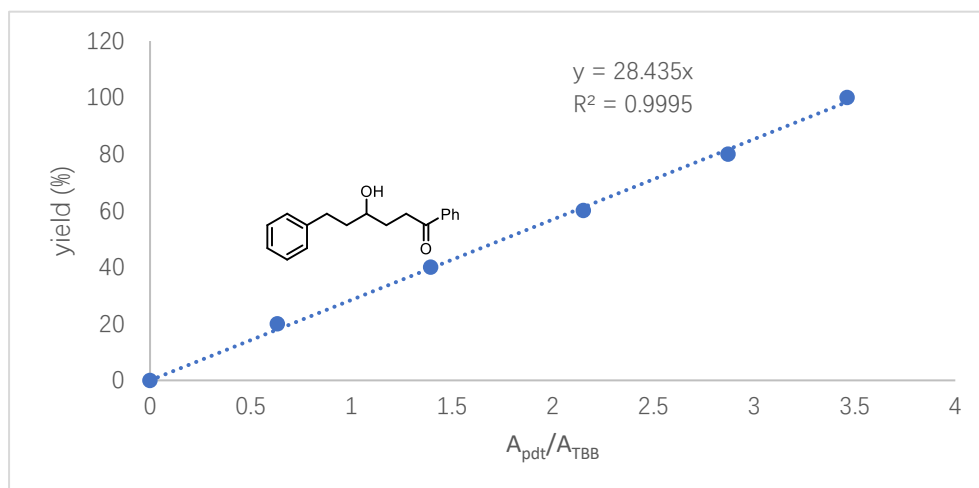

Enzymatic reaction was conducted according to the general procedure for hydroxylation reaction in vials using but-3-en-1-ylbenzene (**1n**) and 2-bromo-1-phenylethan-1-one (**2a**) as the starting materials.

**Yield:** 18%.

**Enantioselectivity:** 61:39 er. Chiral HPLC method: AS-H column, 254 nm, 7% isopropanol/hexanes, flow rate 1.0 mL/min, room temperature,  $t_R$  (major) = 17.87 min,  $t_R$  (minor) = 21.10 min.

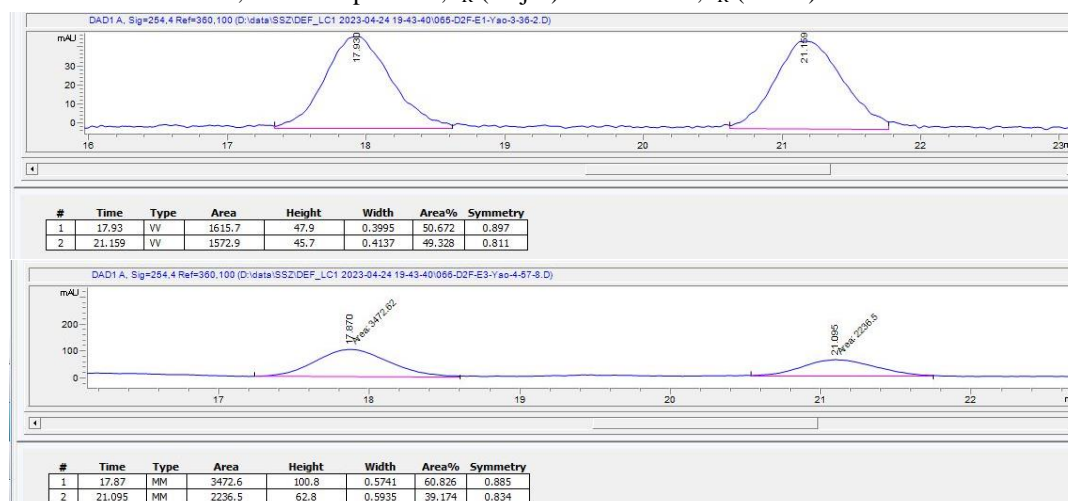

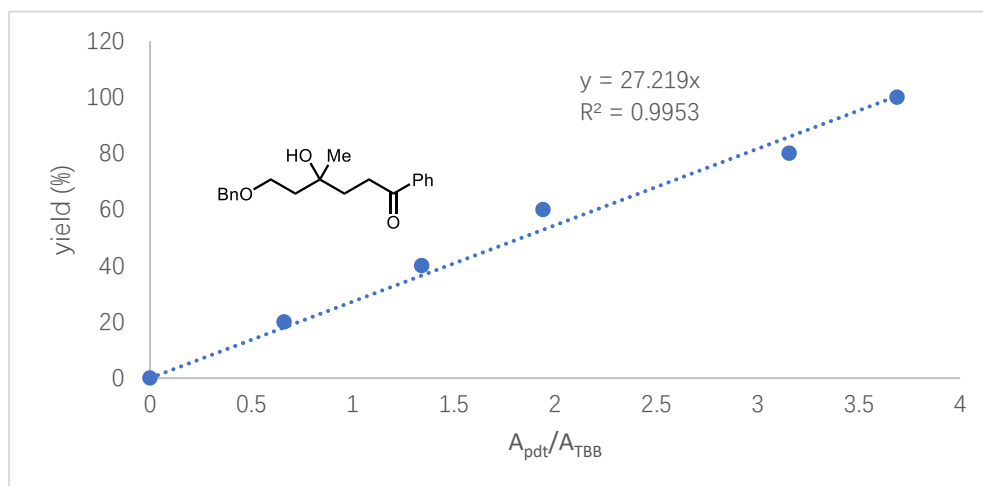

Enzymatic reaction was conducted according to the general procedure for hydroxylation reaction in vials using (((3-methylbut-3-en-1-yl)oxy)methyl)benzene (**1o**) and 2-bromo-1-phenylethan-1-one (**2a**) as the starting materials.

**Yield:** 40%.

**Enantioselectivity:** 52:48 er. Chiral HPLC method: AS-H column, 220 nm, 5% isopropanol/hexanes, flow rate 1.0 mL/min, room temperature,  $t_R$  (major) = 26.91 min,  $t_R$  (minor) = 23.76 min.

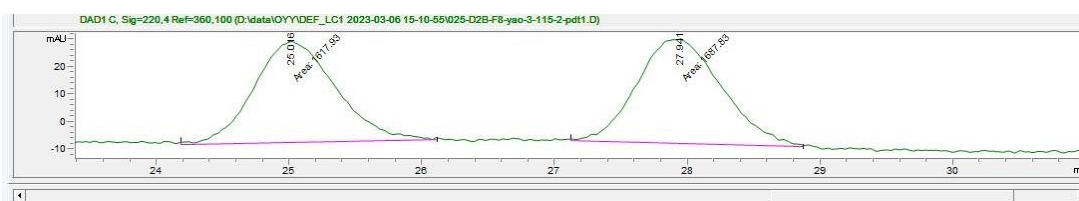

| # | Time   | Type | Area   | Height | Width  | Area%  | Symmetry |
|---|--------|------|--------|--------|--------|--------|----------|
| 1 | 25.016 | MM   | 1617.9 | 37.1   | 0.7273 | 48.943 | 0.829    |
| 2 | 27.941 | MM   | 1687.8 | 37.9   | 0.743  | 51.057 | 0.963    |

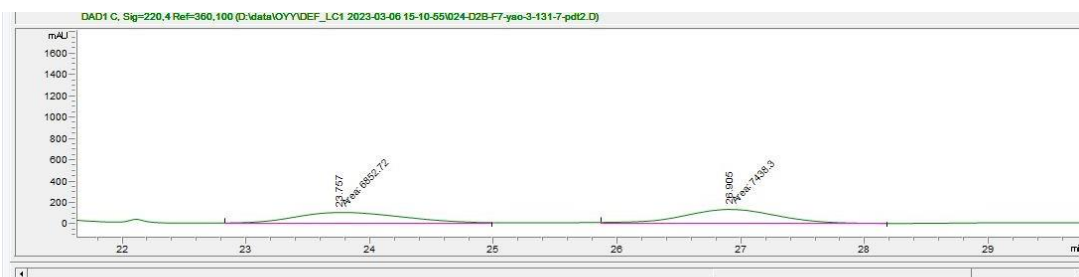

| # | Time   | Type | Area   | Height | Width  | Area%  | Symmetry |
|---|--------|------|--------|--------|--------|--------|----------|
| 1 | 23.757 | MM   | 6852.7 | 106.1  | 1.0768 | 47.951 | 0.731    |
| 2 | 26.905 | MM   | 7438.3 | 134.1  | 0.9244 | 52.049 | 0.906    |

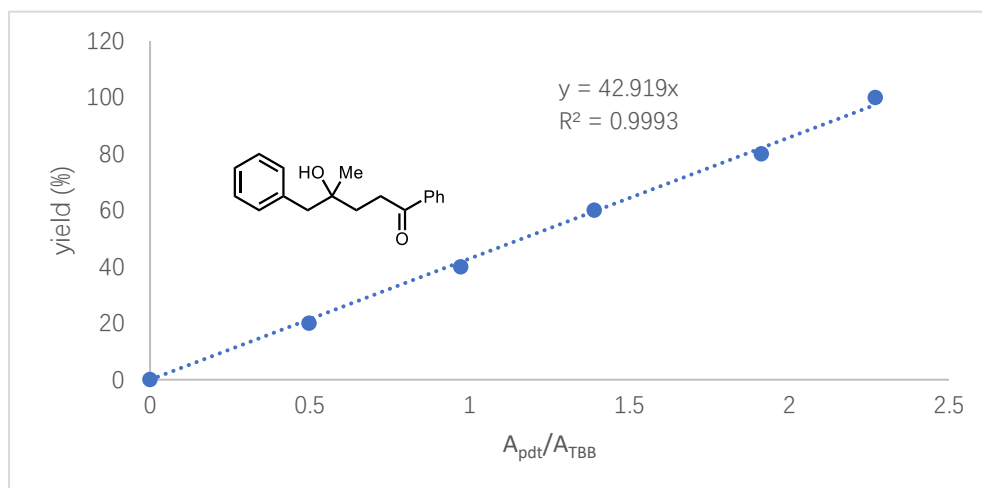

Enzymatic reaction was conducted according to the general procedure for hydroxylation reaction in vials using (2-methylallyl)benzene (**1p**) and 2-bromo-1-phenylethan-1-one (**2a**) as the starting materials.

**Yield:** 41%.

**Enantioselectivity:** 56:44 er. Chiral HPLC method: AS-H column, 210 nm, 5% isopropanol/hexanes, flow rate 1.0 mL/min, room temperature,  $t_R$  (major) = 22.58 min,  $t_R$  (minor) = 18.35 min.

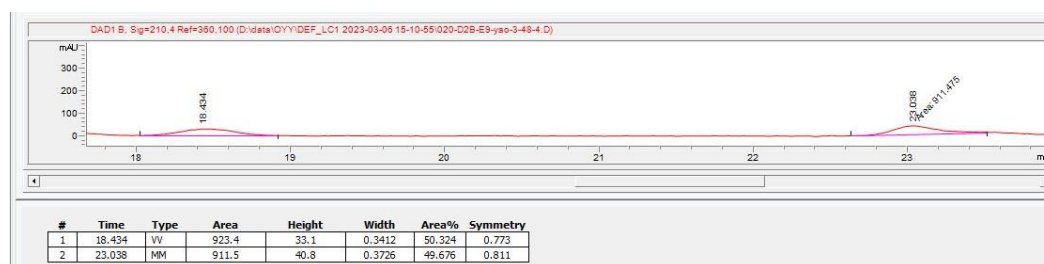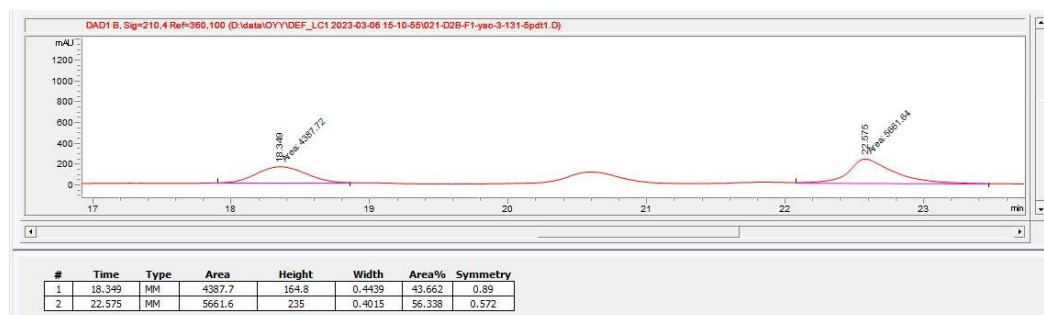

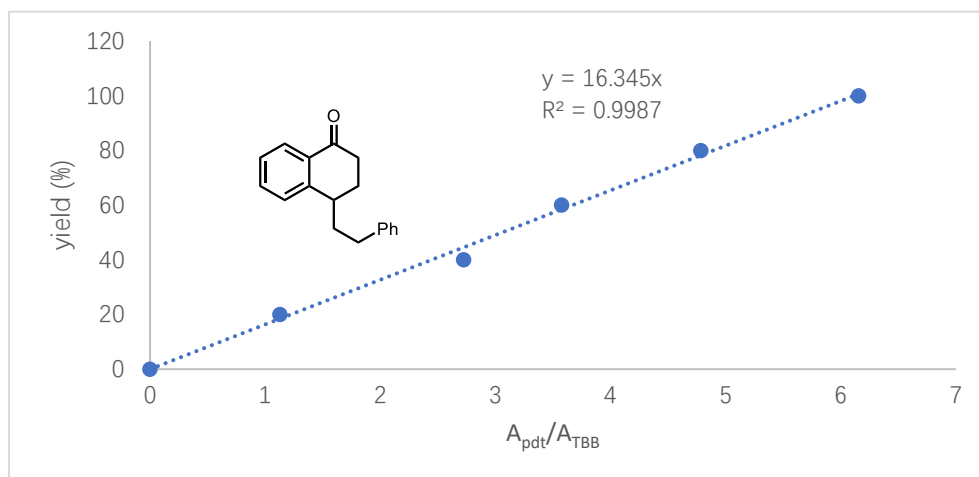

Enzymatic reaction was conducted according to the general procedure for hydroxylation reaction in vials using but-3-en-1-ylbenzene (**1n**) and 2-bromo-1-phenylethan-1-one (**2a**) as the starting materials.

**Yield:** 15%.

**Enantioselectivity:** 53:47 er. Chiral HPLC method: AS-H column, 254 nm, 5% isopropanol/hexanes, flow rate 1.0 mL/min, room temperature,  $t_R$  (major) = 16.13 min,  $t_R$  (minor) = 15.19 min.

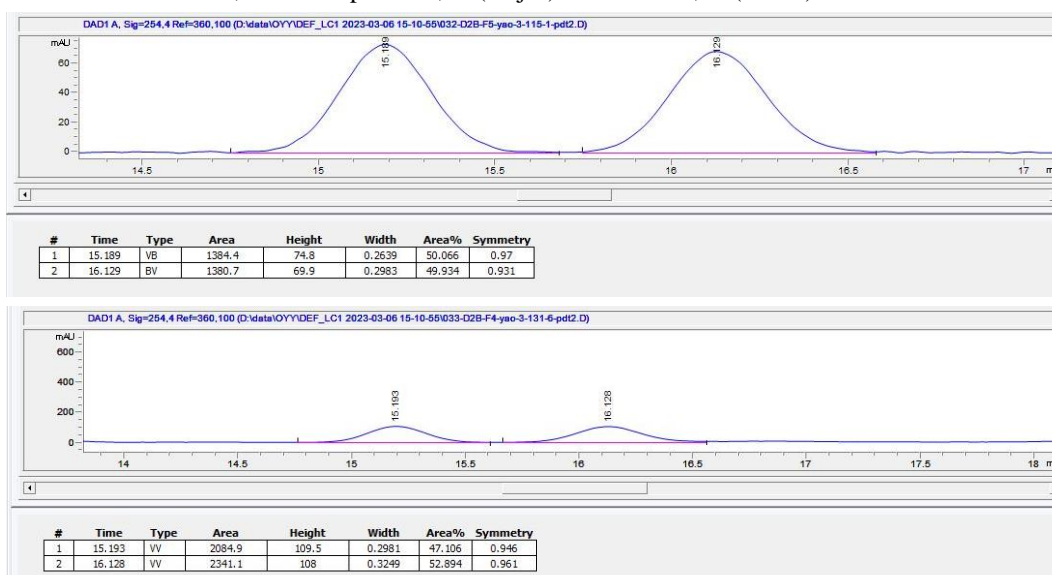

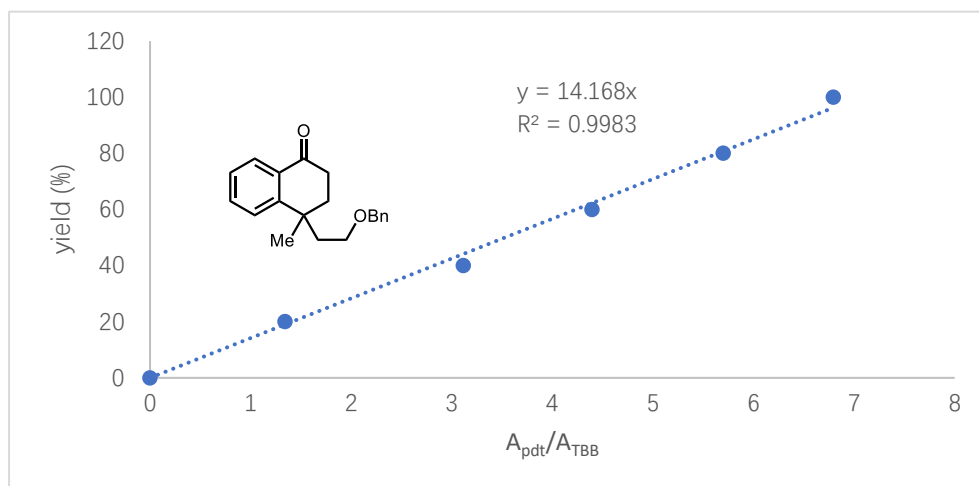

Enzymatic reaction was conducted according to the general procedure for hydroxylation reaction in vials using (((3-methylbut-3-en-1-yl)oxy)methyl)benzene (**1o**) and 2-bromo-1-phenylethan-1-one (**2a**) as the starting materials.

**Yield:** 19%.

**Enantioselectivity:** 60:40 er. Chiral HPLC method: AS-H column, 220 nm, 5% isopropanol/hexanes, flow rate 1.0 mL/min, room temperature,  $t_R$  (major) = 10.89 min,  $t_R$  (minor) = 18.87 min.

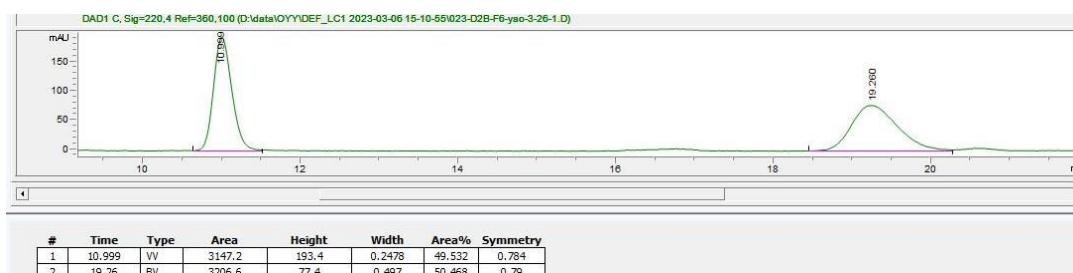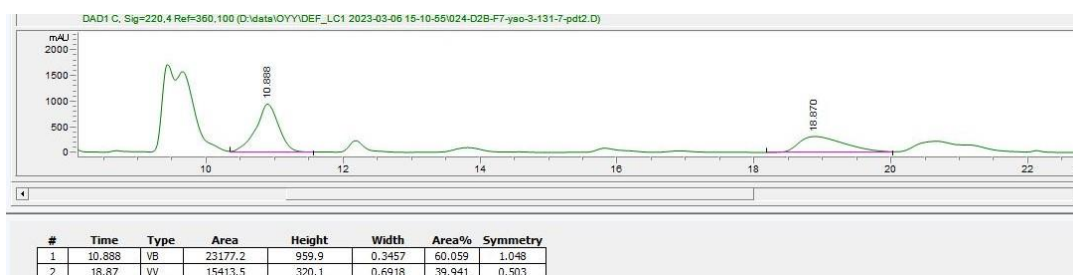

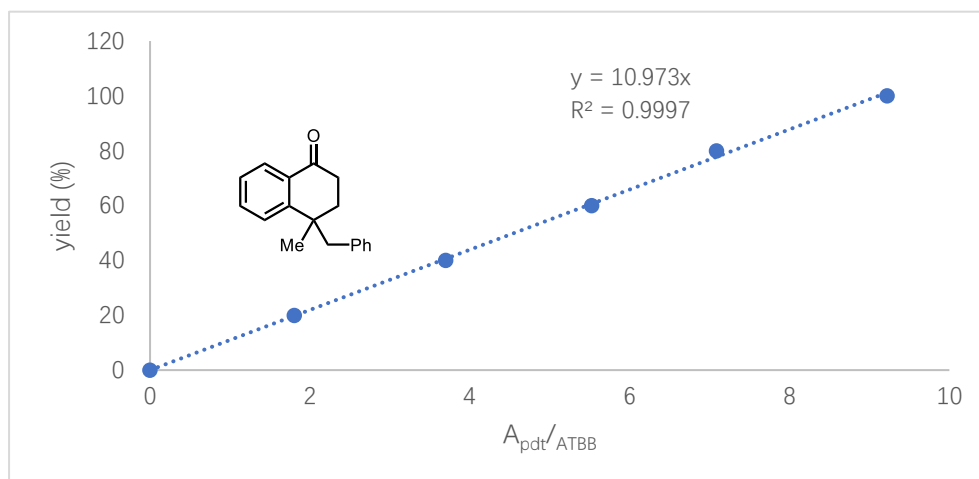

Enzymatic reaction was conducted according to the general procedure for hydroxylation reaction in vials using (2-methylallyl)benzene (**1p**) and 2-bromo-1-phenylethan-1-one (**2a**) as the starting materials.

**Yield:** 30%.

**Enantioselectivity:** 57:43 er. Chiral HPLC method: AS-H column, 254 nm, 5% isopropanol/hexanes, flow rate 1.0 mL/min, room temperature,  $t_R$  (major) = 8.49 min,  $t_R$  (minor) = 9.00 min.

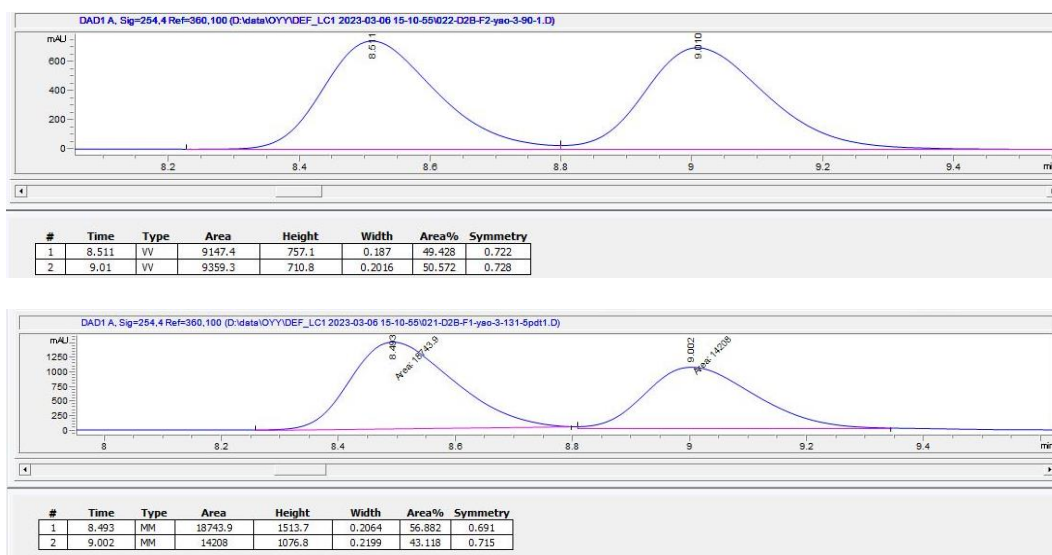

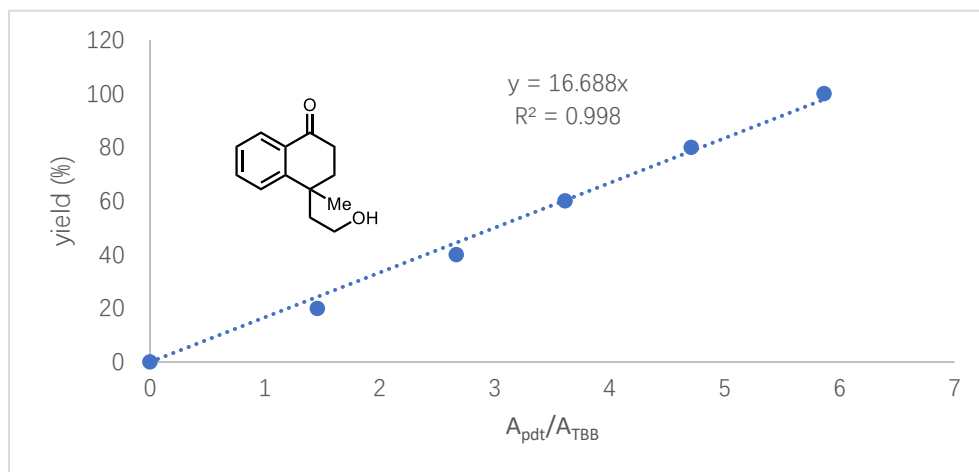

Enzymatic reaction was conducted according to the general procedure for hydroxylation reaction in vials using 3-methylbut-3-en-1-ol (**1q**) and 2-bromo-1-phenylethan-1-one (**2a**) as the starting materials.

**Yield:** 40%.

**Enantioselectivity:** 51:49 er. Chiral HPLC method: IB-H column, 254 nm, 5% isopropanol/hexanes, flow rate 1.0 mL/min, room temperature,  $t_R$  (major) = 21.07 min,  $t_R$  (minor) = 29.08 min.

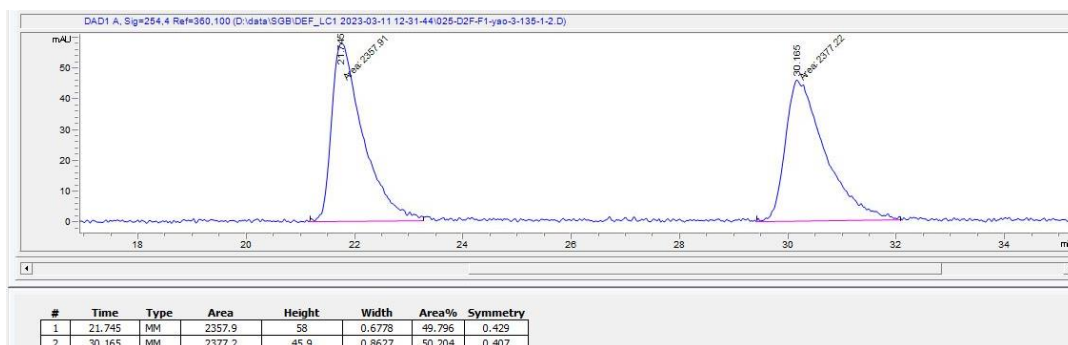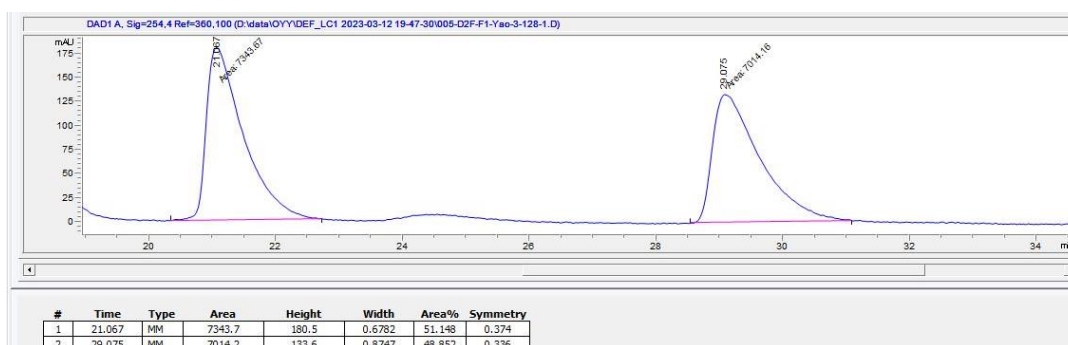

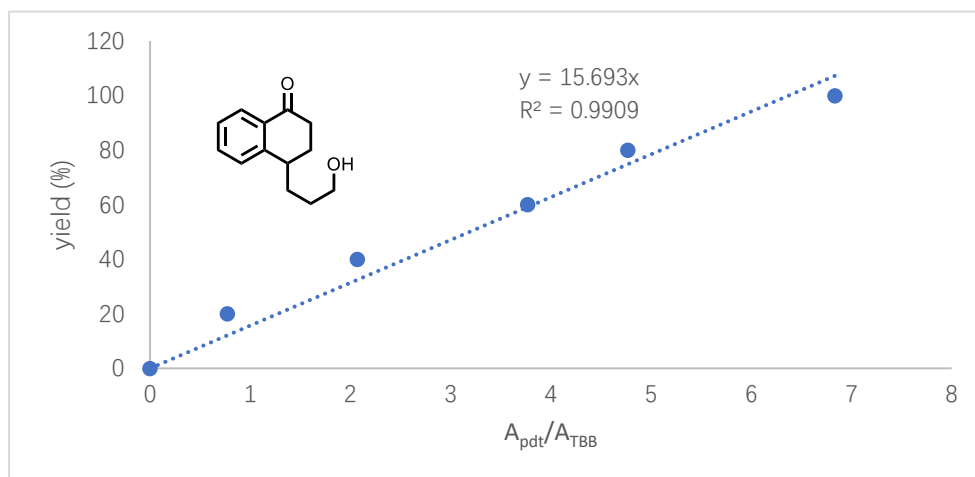

Enzymatic reaction was conducted according to the general procedure for hydroxylation reaction in vials using 3-methylbut-3-en-1-ol (**1r**) and 2-bromo-1-phenylethan-1-one (**2a**) as the starting materials.

**Yield:** 19%.

**Enantioselectivity:** 53:47 er. Chiral HPLC method: IA-H column, 254 nm, 10% isopropanol/hexanes, flow rate 1.0 mL/min, room temperature,  $t_R$  (major) = 12.84 min,  $t_R$  (minor) = 12.22 min.

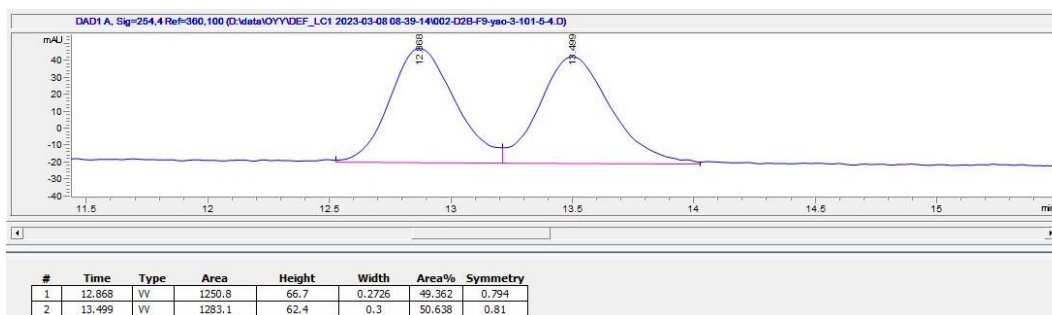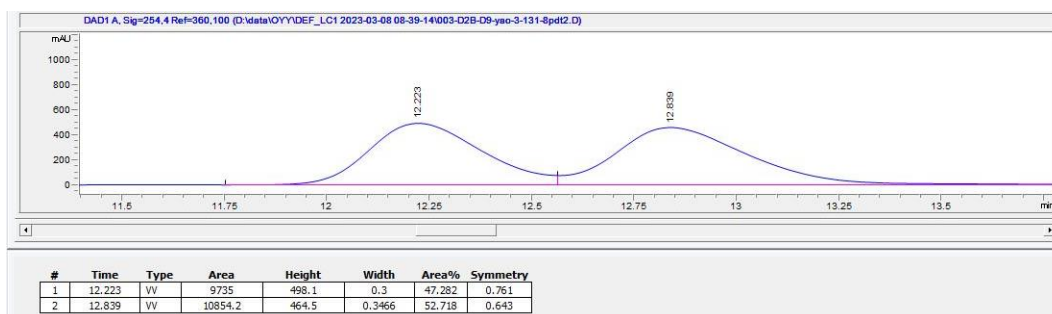



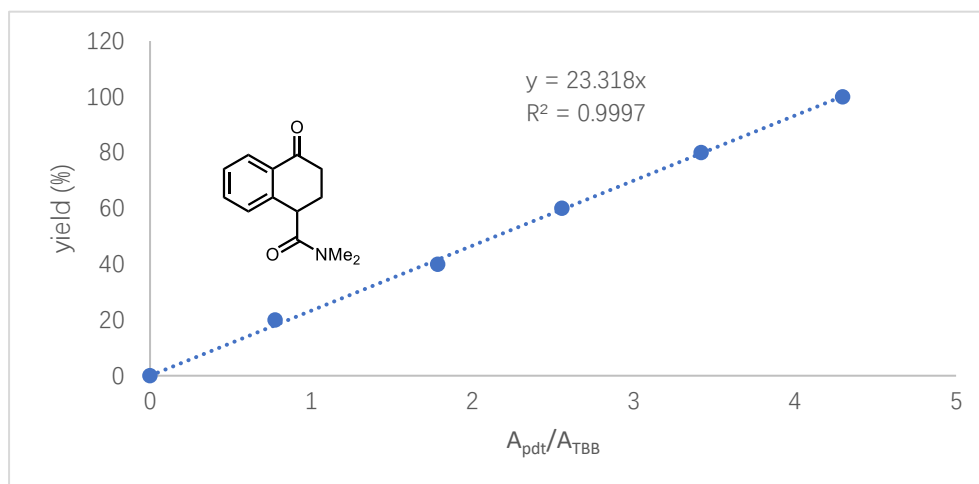

Enzymatic reaction was conducted according to the general procedure for hydroxylation reaction in vials using *N,N*-dimethylacrylamide (**1s**) and 2-bromo-1-phenylethan-1-one (**2a**) as the starting materials.

**Yield:** 14%.

**Enantioselectivity:** 70:30 er. Chiral HPLC method: OJ-H column, 254 nm, 15% isopropanol/hexanes, flow rate 1.0 mL/min, room temperature,  $t_R$  (major) = 23.22 min,  $t_R$  (minor) = 21.33 min.

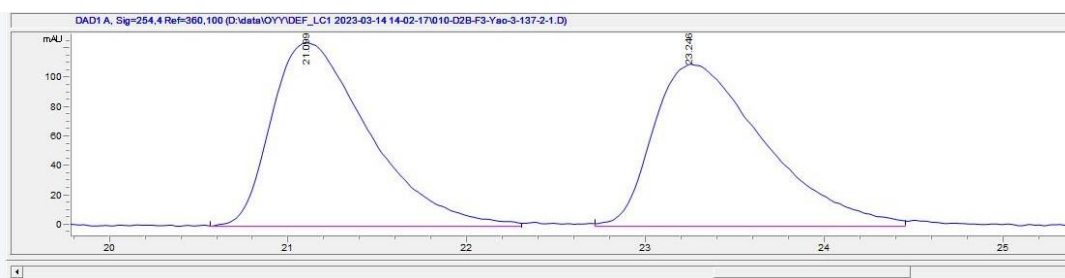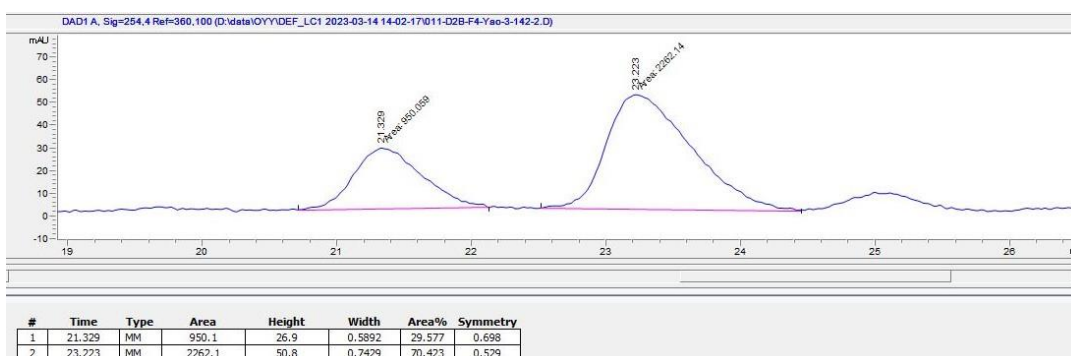

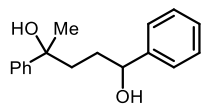

Product **rac-34** was prepared using **rac-4** according to the General procedure I for the product derivatization. Enzymatic product **34** was prepared using **4** according to the same method.

**Yields:** isolated, quant., d.r 1.2:1.

**Enantioselectivity:** 92:8 er, 93:7 er. Chiral HPLC method: AS-H column, 210 nm, 10% isopropanol/hexanes, flow rate 1.0 mL/min, room temperature, isomer 1:  $t_R$  (major) = 8.80 min,  $t_R$  (minor) = 7.98 min, isomer 2:  $t_R$  (major) = 9.22 min,  $t_R$  (minor) = 8.45 min.

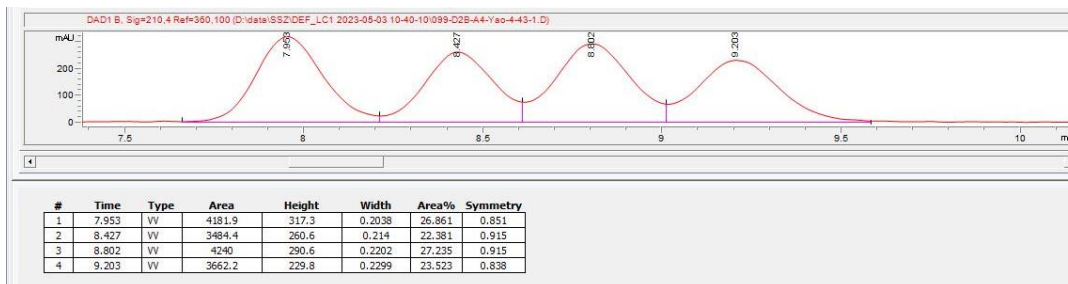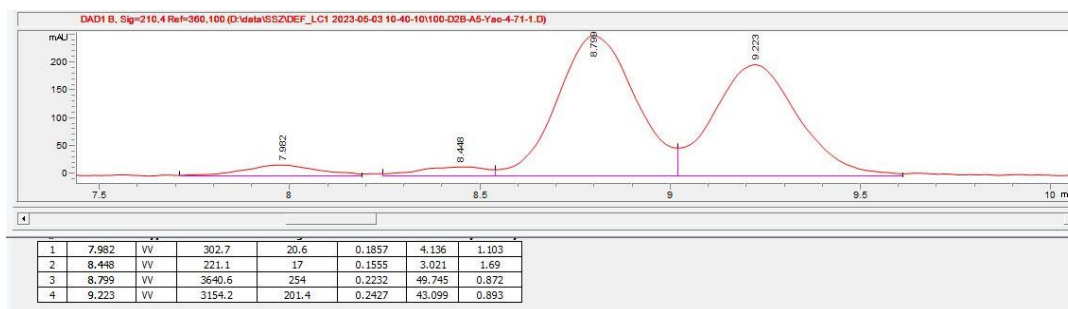

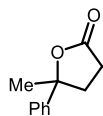

Product **rac-35** was prepared using **rac-4** according to the General procedure II for the product derivatization. Enzymatic product **35** was prepared using **4** according to the same method.

**Yields:** isolated, 60%.

**Enantioselectivity:** 93:7 er. Chiral HPLC method: IC-H column, 210 nm, 10% isopropanol/hexanes, flow rate 1.0 mL/min, room temperature,  $t_R$  (major) = 18.35 min,  $t_R$  (minor) = 20.45 min.

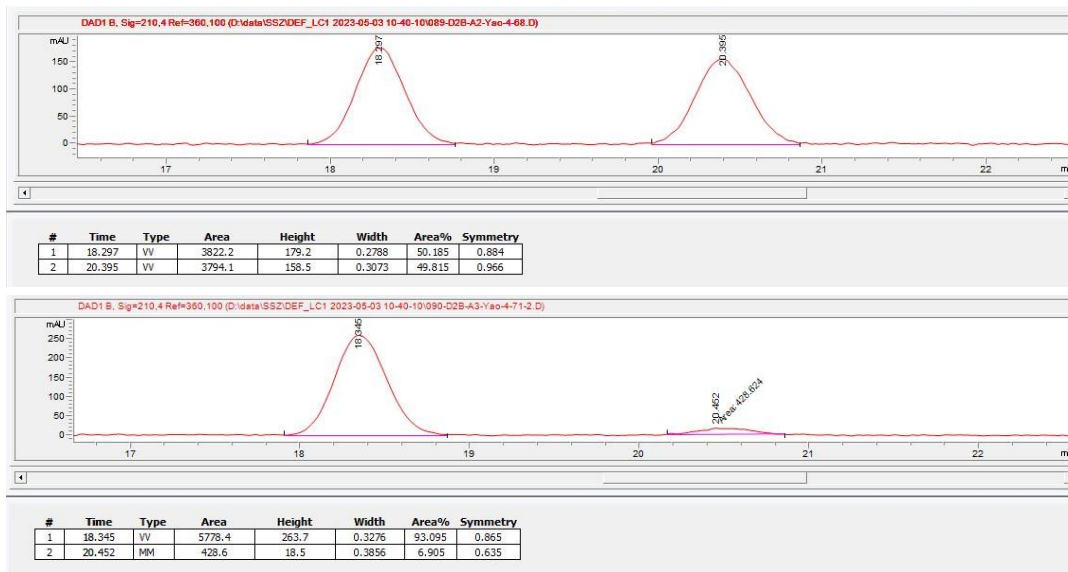

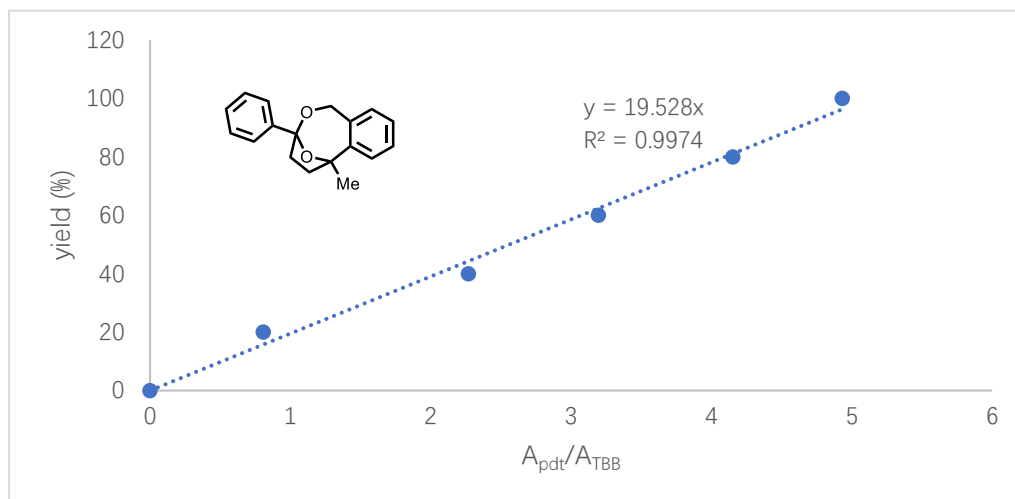

Enzymatic reaction was conducted according to the general procedure for hydroxylation reaction in vials using (2-(prop-1-en-2-yl)phenyl)methanol (**36**) and 2-bromo-1-phenylethan-1-one (**2a**) as the starting materials.

**Yield:** 65%.

**Enantioselectivity:** 59:41 er. Chiral HPLC method: IA-H column, 254 nm, 2% isopropanol/hexanes, flow rate 1.0 mL/min, room temperature,  $t_R$  (major) = 7.05 min,  $t_R$  (minor) = 18.04 min.

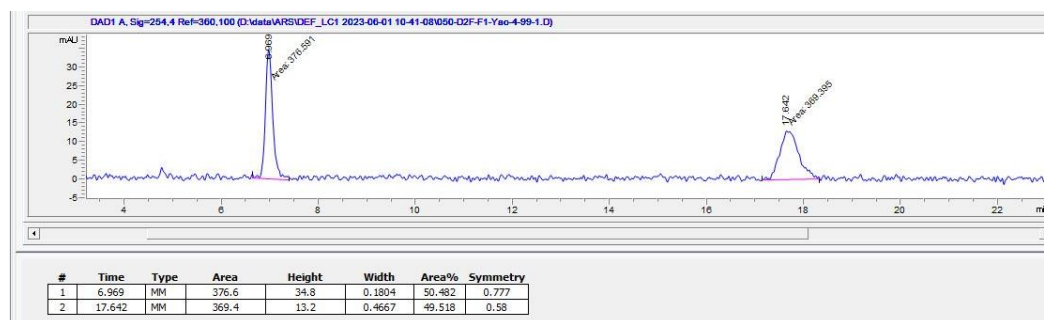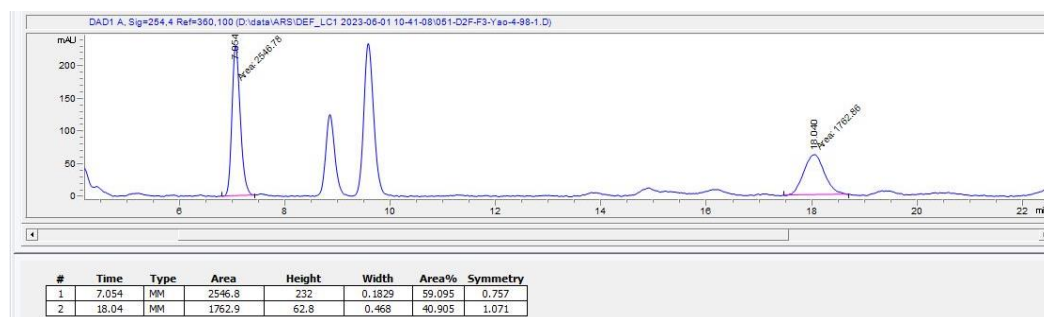

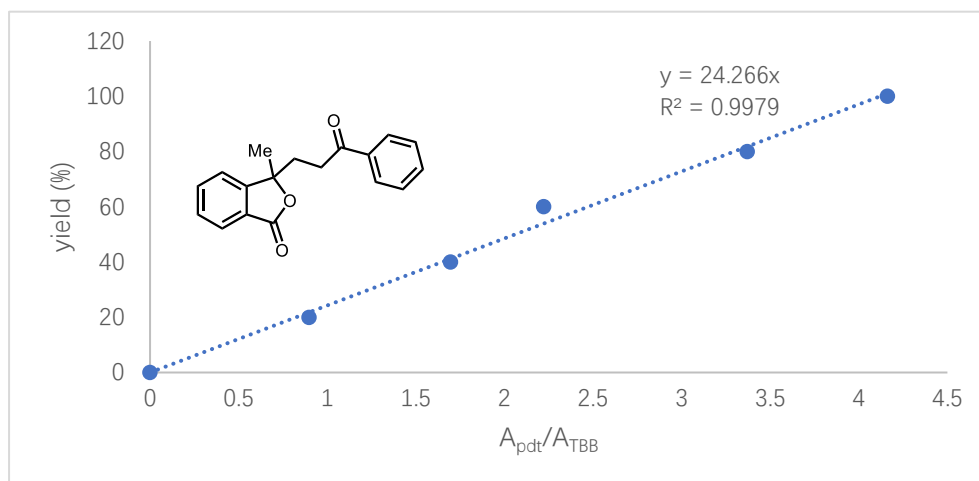

Enzymatic reaction was conducted according to the general procedure for hydroxylation reaction in vials using 2-(prop-1-en-2-yl)benzoic acid (**38**) and 2-bromo-1-phenylethan-1-one (**2a**) as the starting materials.

**Yield:** 21%.

**Enantioselectivity:** 71:29 er. Chiral HPLC method: IA-H column, 254 nm, 13% isopropanol/hexanes, flow rate 1.0 mL/min, room temperature,  $t_R$  (major) = 10.49 min,  $t_R$  (minor) = 11.40 min.

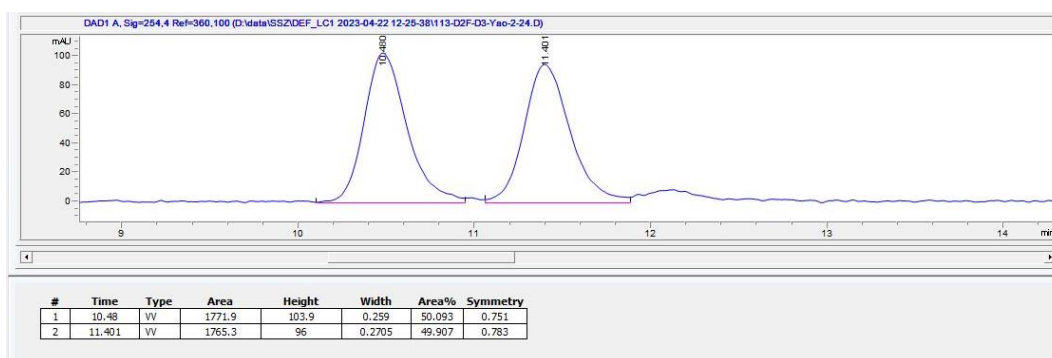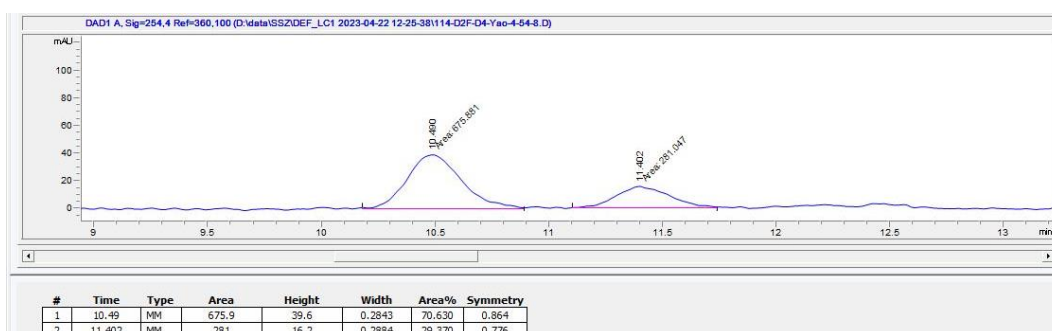

## Absolute configuration determination

Absolute configuration of product **8** was assigned to be *S* by using the same HPLC column AD-H according to the reported data<sup>17</sup>. The absolute configuration of the rest of products can be deduced to be *S*.

**Enantioselectivity:** 94:6 er. Chiral HPLC method: AD-H column, 254 nm, 5% isopropanol/hexanes, flow rate 1.0 mL/min, room temperature,  $t_R$  (major) = 19.99 min,  $t_R$  (minor) = 17.91 min.

### <Sample Information>

Sample Name : yao-4-20AD5%  
Sample ID :  
Data Filename : yao-4-20AD5%\_003.lcd  
Method Filename : AD 5%-50 min hold 1.0 mL 40 C.lcm  
Batch Filename : 20230417-4.lcb  
Vial # : 1-61  
Injection Volume : 5  $\mu$ L  
Date Acquired : 4/17/2023 7:57:08 PM  
Date Processed : 4/18/2023 10:16:26 AM  
Sample Type : Unknown  
Acquired by : AS-CHM-SLinInst  
Processed by : AS-CHM-SLinInst

### <Chromatogram>

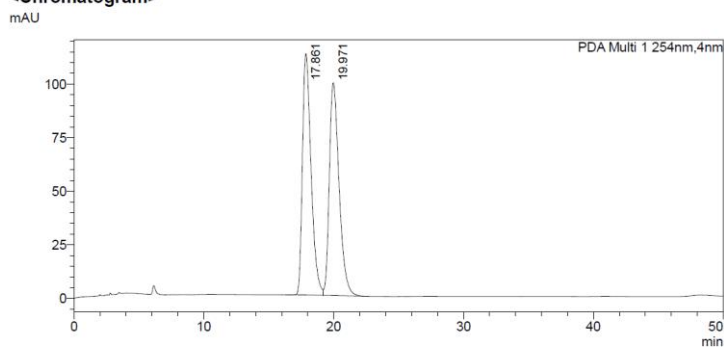

### <Peak Table>

| Peak# | Ret. Time | Area     | Height | Area%   |
|-------|-----------|----------|--------|---------|
| 1     | 17.861    | 5202931  | 112608 | 50.042  |
| 2     | 19.971    | 5194200  | 99241  | 49.958  |
| Total |           | 10397130 | 211849 | 100.000 |

## SHIMADZU LabSolutions Analysis Report

### <Sample Information>

Sample Name : yao-4-41AD5%  
Sample ID :  
Data Filename : yao-4-41AD5%\_006.lcd  
Method Filename : AD 5%-50 min hold 1.0 mL 40 C.lcm  
Batch Filename : 20230417-4.lcb  
Vial # : 1-62  
Injection Volume : 5  $\mu$ L  
Date Acquired : 4/17/2023 8:58:53 PM  
Date Processed : 4/18/2023 10:18:41 AM  
Sample Type : Unknown  
Acquired by : AS-CHM-SLinInst  
Processed by : AS-CHM-SLinInst

### <Chromatogram>

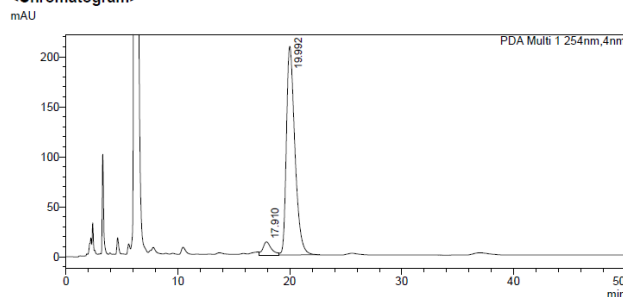

### <Peak Table>

| Peak# | Ret. Time | Area     | Height | Area%   |
|-------|-----------|----------|--------|---------|
| 1     | 17.910    | 696189   | 13169  | 5.947   |
| 2     | 19.992    | 11010708 | 208817 | 94.053  |
| Total |           | 11706897 | 221986 | 100.000 |

## UV-Vis experiment

A blank solution of degassed Tris buffer (100 mM, pH 8.0) was prepared and used to obtain a baseline spectrum. A 50  $\mu\text{M}$  solution of enzyme was prepared by mixing MorB-B3 (mutant S34Q, 100 nmol, 1 equiv) with degassed Tris buffer (the total volume is 800  $\mu\text{L}$ ) in an anaerobic chamber and a spectrum was taken of the oxidized MorB-B3. The oxidized FMN cofactor was reduced by titration with sodium dithionite (5 mg/mL) in Tris buffer (100 mM, pH 8.0). Following filtration through a syringe filter, a spectrum of the reduced MorB-B3 (FMN<sub>hq</sub>) was obtained. To detect the presence of a charge transfer-complex, 15  $\mu\text{mol}$  of bromoacetophenone dissolved in THF (50  $\mu\text{L}$ , 9 mg/150  $\mu\text{L}$ ) was added to the reduced MorB-B3 solution and filtered through a syringe filter. Upon addition of bromoacetophenone, two peaks at 350 nm and 450 nm showed up, which belong to the features of oxidized FMN. Due to the fast ground-state electron transfer, no CT state was observed between the reduced MorB-B3 and bromoacetophenone.

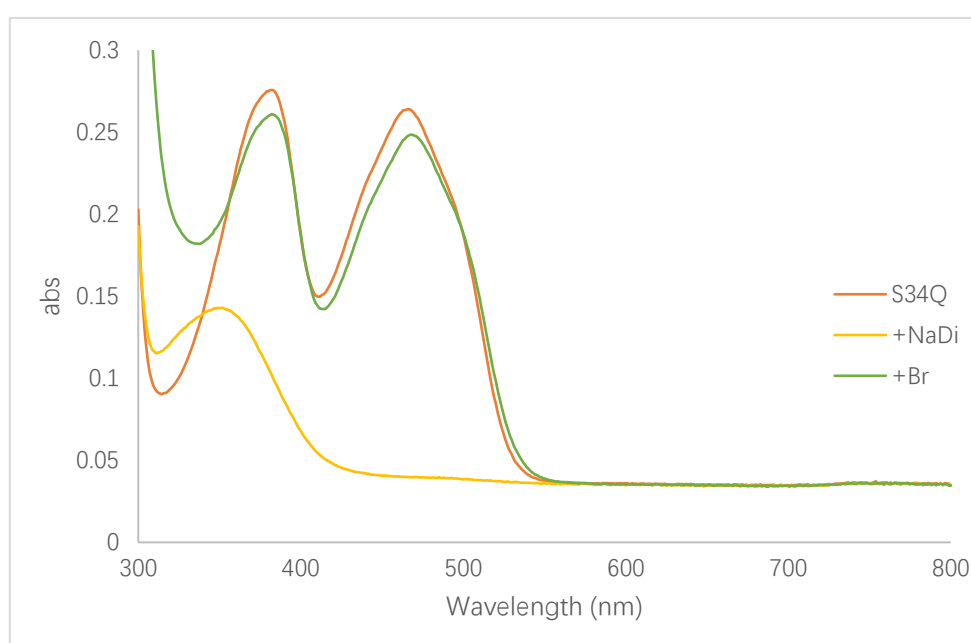

## Turnover reduction of FMN<sub>ox</sub> to FMN<sub>hq</sub>

A blank solution of degassed Tris buffer (100 mM, pH 8.0) was prepared and used to obtain a baseline spectrum. A 50  $\mu\text{M}$  solution of enzyme was prepared by mixing MorB-B3 (100 nmol, 1 equiv) with degassed Tris buffer (the total volume is 800  $\mu\text{L}$ ) in an anaerobic chamber and a spectrum was taken of the oxidized MorB-B3. The oxidized FMN cofactor was reduced by cofactor regeneration mix (NADP<sup>+</sup>, 5 equiv, GDH, 0.12 mg, and glucose, 100 equiv.), as monitored by UV-Vis. FMN<sub>ox</sub> was fully reduced to FMN<sub>hq</sub> in 50 min.

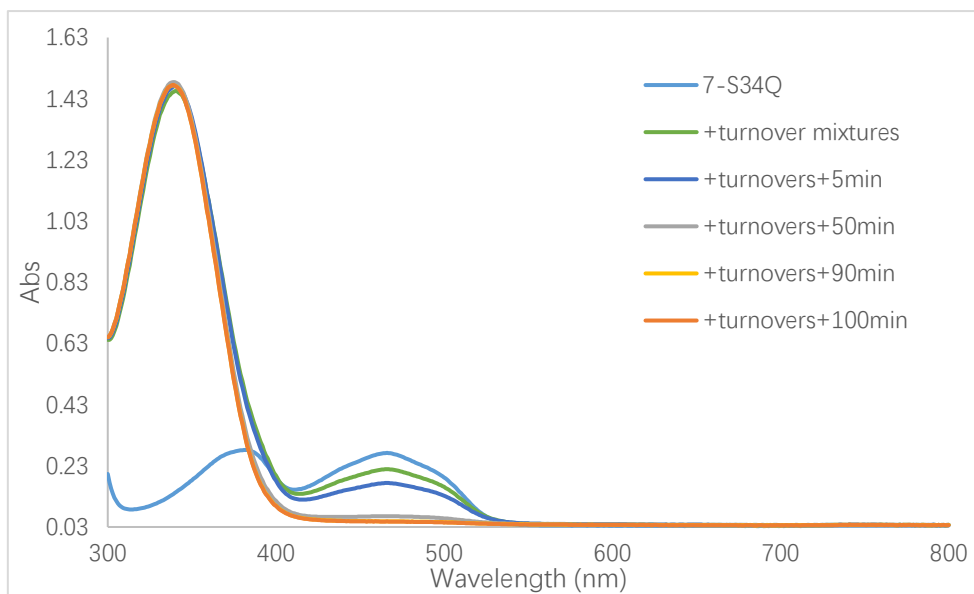

### Density functional theory (DFT) calculations

All DFT computations were carried out using the Gaussian 16, Revision C.01 program<sup>21</sup> and the  $\omega$ B97XD functional<sup>22</sup>. All structures were optimized at the  $\omega$ B97X-D/6-31G(d,p) level of theory<sup>22</sup>. Higher level of theory single point calculations were performed at the  $\omega$ B97X-D/6-31G(d,p) level of theory with polarizable continuum model (IEFPCM) in water<sup>23-25</sup>. Computed structures were illustrated with CYLview<sup>26</sup>. Simplified model of FMNs<sub>q</sub> and FMN were used as previous computational works<sup>27,28</sup>.

### Thermal energy diagram of radical oxidation step

We performed the DFT calculation to compare the changes in Gibbs free energy during the radical oxidation step. Two radical intermediates were proposed for this step, and both of them are endothermic. The oxidation of the linear radical intermediate exhibited a  $\Delta G$  as high as 22.0 kcal/mol, a value too high to be likely at room temperature. However, the oxidation of the cyclic intermediate showed a  $\Delta G$  of only 6.6 kcal/mol, a value that suggests feasibility at room temperature (**Supplementary Figure 5**).



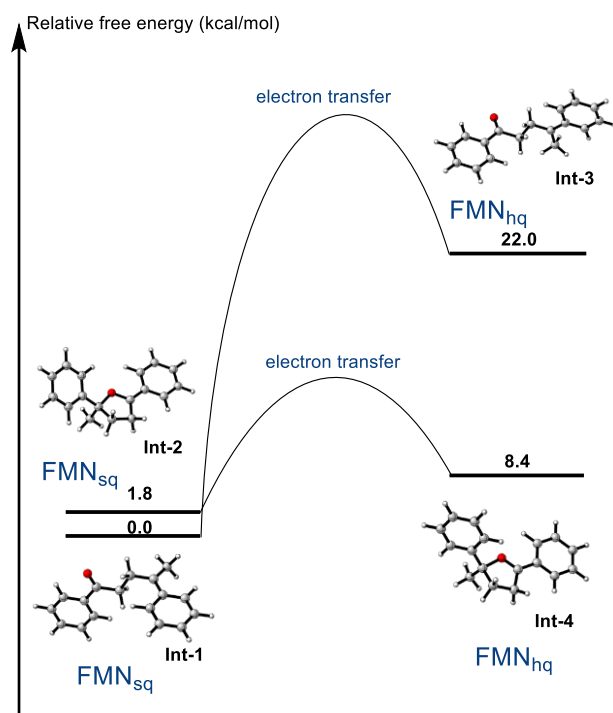

**Supplementary Figure 5.** Thermal energy changes during radical oxidation step

#### Pathway to radical intermediate 2 (Int-2)

The transformation from **Int-1** to **Int-2** typically involves a straightforward intramolecular cyclization. However, we discovered that the energy barrier to reach the transition state (**TS-1**) is 24.6 kcal/mol, a value slightly above what is usually achievable at room temperature (**Supplementary Figure 5**). We hypothesize that the larger enzyme pocket of MorB may help the preorganization of the molecular skeleton, facilitating the cyclization from **Int-1** to **Int-2**. In contrast, other EREDs, such as NCR and GluER-T36A, possess narrower pockets, creating conditions less conducive to the radical cyclization step, and instead favoring the reductive coupling product.

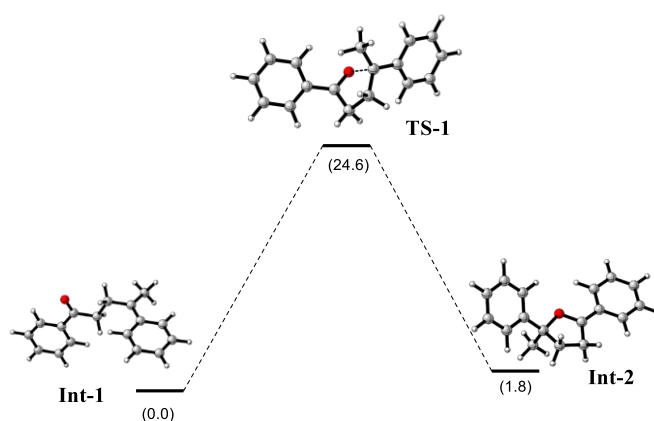

**Supplementary Figure 6.** Pathway to **Int-2**

#### Possible FMN-mediated hydroxylation step

Though the nucleophilic attack of a cation by  $\text{H}_2\text{O}$  is a common mechanism of hydroxylation in  $\text{S}_{\text{N}}1$  reactions, the hydroxylation product could also be directly obtained from a linear radical intermediate.

We hypothesize that FMNs<sub>sq</sub> could facilitate the coordination of H<sub>2</sub>O and the linear radical intermediate, simultaneously breaking the O-H bond of H<sub>2</sub>O and forming the C-O bond of the product. Concurrently, FMNs<sub>sq</sub> would be reduced to FMN<sub>hq</sub>. We performed DFT calculation to find the transition state of the direct hydroxylation step (**Supplementary Figure 7**).

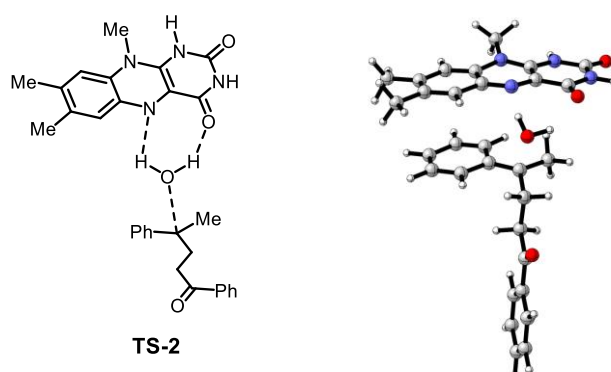

**Supplementary Figure 7.** Transition state of FMN-mediated hydroxylation

We assumed that FMN mediated the interaction between H<sub>2</sub>O and the radical intermediate, thus the N-5 atom of FMN should interact with H<sub>2</sub>O. Consequently, the original N-5 hydrogen atom would need to be repositioned to another amide nitrogen atom, which we designate as FMNs<sub>sq</sub>'. The energy difference between FMNs<sub>sq</sub> and FMNs<sub>sq</sub>' is only 5.6 kcal/mol. This energy gap should allow transformation between these two states at room temperature (**Supplementary Figure 8**).

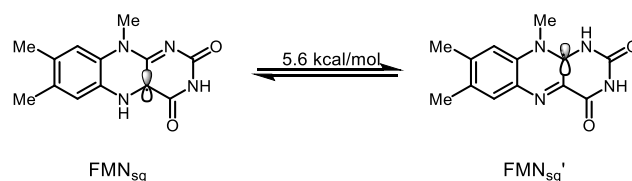

**Supplementary Figure 8.** Interconversion of FMNs<sub>sq</sub> and FMNs<sub>sq</sub>'

However, the activation energy barrier for direct FMNs<sub>sq</sub> mediated hydroxylation step is 39.3 kcal/mol, which is not feasible at room temperature (**Supplementary Figure 9**).

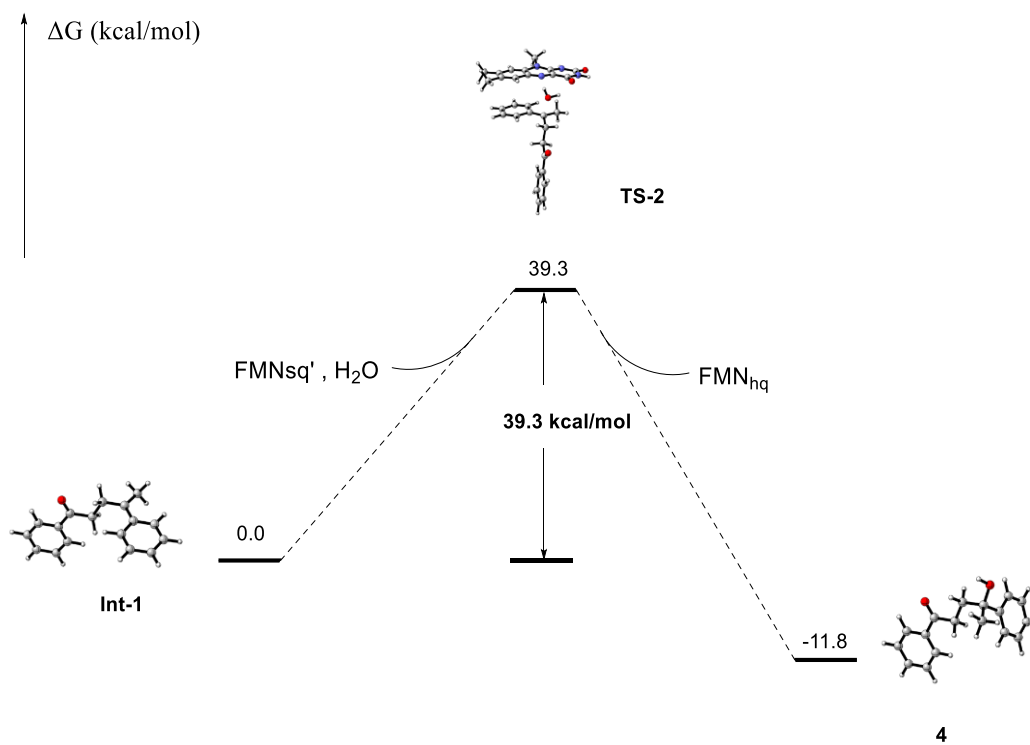

**Supplementary Figure 9.** Direct FMN-mediated hydroxylation.

### Molecular coordinates of calculated structures

Note: energies reported below are in units of hartrees

#### Int-1 (Liner Radical)

Electronic Energy: -733.26464566

Thermal correction to Gibbs Free Energy: 0.24737200

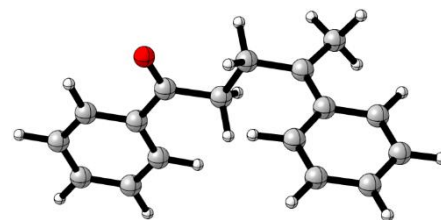

|   |             |             |             |
|---|-------------|-------------|-------------|
| C | -2.90949400 | 0.22292500  | 0.03238300  |
| C | -2.62401400 | -0.77928100 | -0.93290800 |
| C | -4.97599800 | -0.98734000 | 0.53632500  |
| C | -3.48466500 | -1.84227200 | -1.14724100 |
| H | -1.71323200 | -0.72081500 | -1.51902300 |
| C | -4.66818700 | -1.95868500 | -0.41695900 |
| H | -5.89493400 | -1.06354500 | 1.10975000  |
| H | -3.23250100 | -2.59048800 | -1.89257800 |
| H | -5.34046600 | -2.79268900 | -0.58902500 |
| C | -4.12017500 | 0.07783400  | 0.76038400  |
| H | -4.38885500 | 0.81905700  | 1.50521700  |
| C | -2.02674700 | 1.31991900  | 0.27190200  |
| C | -2.31360800 | 2.30689400  | 1.36666500  |
| H | -1.48720400 | 3.01211800  | 1.48503100  |
| H | -3.21785600 | 2.89522200  | 1.15916200  |
| H | -2.47362900 | 1.81648100  | 2.33518400  |
| C | -0.74487600 | 1.48092400  | -0.49450000 |
| H | -0.85515900 | 1.18550200  | -1.54173900 |
| H | -0.45226600 | 2.53499800  | -0.51743700 |
| C | 0.39773500  | 0.66975200  | 0.13177900  |
| H | 0.12757700  | -0.39322100 | 0.17312200  |
| H | 0.55643500  | 0.97589600  | 1.17407800  |
| C | 2.91126100  | 0.07114900  | -0.12099400 |
| C | 2.87307200  | -0.75817000 | 1.00355000  |
| C | 4.11293600  | 0.22319300  | -0.81917400 |
| C | 4.02000000  | -1.42433200 | 1.42214300  |
| H | 1.95075000  | -0.89174800 | 1.55924300  |
| C | 5.25738400  | -0.44135500 | -0.40102000 |
| H | 4.12203900  | 0.87040200  | -1.68946100 |
| C | 5.21194700  | -1.26654400 | 0.72109300  |
| H | 3.98289300  | -2.06710000 | 2.29559000  |
| H | 6.18638800  | -0.31809700 | -0.94817100 |
| H | 6.10621100  | -1.78718500 | 1.04898300  |
| C | 1.70811100  | 0.81471500  | -0.62198300 |
| O | 1.78446300  | 1.51740700  | -1.61207500 |

### Int-3 (Liner Cation)

Electronic Energy: -733.09346812

Thermal correction to Gibbs Free Energy: 0.24936800

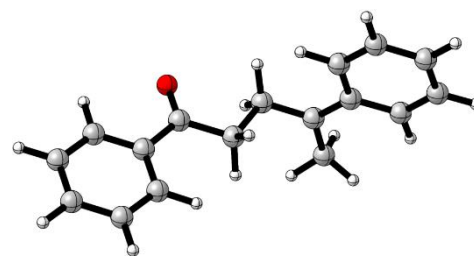

|   |             |             |             |
|---|-------------|-------------|-------------|
| C | 2.92114600  | 0.20866200  | -0.05232800 |
| C | 4.13814600  | 0.20050600  | -0.79088200 |
| C | 3.61403200  | -1.85554800 | 1.03920000  |
| C | 5.06755500  | -0.80042100 | -0.60411100 |
| H | 4.35753300  | 0.99356400  | -1.49517000 |
| C | 4.80358200  | -1.82969300 | 0.30498800  |
| H | 3.42462300  | -2.65994600 | 1.74002700  |
| H | 5.99691200  | -0.79212300 | -1.16117700 |
| H | 5.53454700  | -2.61976900 | 0.44417000  |
| C | 2.68826000  | -0.84717700 | 0.87479000  |
| H | 1.77313000  | -0.87512100 | 1.45374400  |
| C | 1.96761200  | 1.24024000  | -0.22816600 |
| C | 2.14101400  | 2.31823300  | -1.23598000 |
| H | 2.67966100  | 2.01742600  | -2.13332600 |
| H | 1.17741900  | 2.74970600  | -1.51315800 |
| H | 2.71298200  | 3.12422400  | -0.75181500 |
| C | 0.72828500  | 1.32204300  | 0.57727100  |
| H | 0.83079500  | 0.91084000  | 1.58084500  |
| H | 0.42451900  | 2.36680000  | 0.68825400  |
| C | -0.40301000 | 0.57213300  | -0.16373500 |
| H | -0.14612800 | -0.48330600 | -0.30723100 |
| H | -0.57770200 | 0.99364300  | -1.15964100 |
| C | -2.92418700 | 0.04018800  | 0.13798300  |
| C | -2.95404000 | -0.65427400 | -1.07705200 |
| C | -4.09249900 | 0.15071100  | 0.90155200  |
| C | -4.13756500 | -1.22997200 | -1.52089400 |
| H | -2.06177500 | -0.75403500 | -1.68734400 |
| C | -5.27286800 | -0.42493600 | 0.45473000  |
| H | -4.05293000 | 0.69241800  | 1.84002400  |
| C | -5.29573800 | -1.11504400 | -0.75573600 |
| H | -4.15855100 | -1.76734900 | -2.46260600 |
| H | -6.17637700 | -0.33660500 | 1.04788400  |
| H | -6.21935400 | -1.56462800 | -1.10485100 |
| C | -1.69277400 | 0.67717200  | 0.66745500  |
| O | -1.66262600 | 1.27091600  | 1.72585800  |

### Int-2 (Cyclic Radical)

Electronic Energy: -733.26676648

Thermal correction to Gibbs Free Energy: 0.25240700

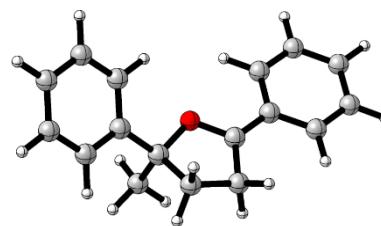

|   |             |             |             |
|---|-------------|-------------|-------------|
| C | -2.31353300 | 0.00663200  | 0.09422500  |
| C | -2.23804100 | -1.37145500 | -0.09788300 |
| C | -4.69898200 | -0.09183000 | -0.31254200 |
| C | -3.38533700 | -2.10390000 | -0.39245900 |
| H | -1.27634100 | -1.86413400 | -0.02048700 |
| C | -4.61776800 | -1.46921700 | -0.50017000 |
| H | -5.65507400 | 0.41496200  | -0.39790400 |
| H | -3.31201200 | -3.17696500 | -0.53939700 |
| H | -5.51020000 | -2.04219900 | -0.73059800 |
| C | -3.55472600 | 0.63914900  | -0.01638000 |
| H | -3.62935600 | 1.71439200  | 0.12420400  |
| C | -1.08325900 | 0.83439500  | 0.41424300  |
| C | -1.17110500 | 1.44000800  | 1.81775600  |
| H | -0.27836100 | 2.03419100  | 2.03492100  |
| H | -2.04947100 | 2.08414800  | 1.90950000  |
| H | -1.24672500 | 0.64205000  | 2.55961100  |
| C | -0.77723200 | 1.89487200  | -0.66389000 |
| H | -1.10725300 | 1.52510700  | -1.63809600 |
| H | -1.28758700 | 2.83962700  | -0.46468200 |
| C | 0.75136800  | 2.00455700  | -0.62375300 |
| H | 1.08544900  | 2.80260800  | 0.05420200  |
| H | 1.17950300  | 2.22277100  | -1.60702700 |
| C | 2.41803100  | 0.05064700  | -0.07921500 |
| C | 3.55550700  | 0.72587000  | -0.59490600 |
| C | 2.60807000  | -1.24500700 | 0.47040400  |
| C | 4.80441900  | 0.13127300  | -0.56390500 |
| H | 3.44462800  | 1.72082400  | -1.01552100 |
| C | 3.86437400  | -1.82250900 | 0.49196200  |
| H | 1.75252200  | -1.77291200 | 0.87631000  |
| C | 4.97376700  | -1.14584000 | -0.02332600 |
| H | 5.66021400  | 0.66677400  | -0.96410100 |
| H | 3.98745000  | -2.81436800 | 0.91688700  |
| H | 5.95590600  | -1.60614500 | -0.00198400 |
| C | 1.14653300  | 0.65252900  | -0.11440900 |
| O | 0.07427400  | -0.02147000 | 0.38370600  |

#### Int-4 (Cyclic Cation)

Electronic Energy: -733.12226784

Thermal correction to Gibbs Free Energy: 0.25652900

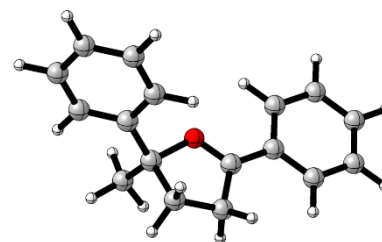

|   |             |             |             |
|---|-------------|-------------|-------------|
| C | -2.29274400 | 0.10348700  | 0.05827600  |
| C | -2.16299100 | -0.87711900 | -0.93202800 |
| C | -4.50042600 | -0.74172300 | 0.56053000  |
| C | -3.18672300 | -1.78351000 | -1.16740800 |
| H | -1.25121800 | -0.94725000 | -1.51957900 |
| C | -4.36187700 | -1.71422200 | -0.42199000 |
| H | -5.41258600 | -0.68215100 | 1.14386700  |
| H | -3.07009700 | -2.54270600 | -1.93296000 |
| H | -5.16577300 | -2.41789500 | -0.60843300 |
| C | -3.46833400 | 0.16031700  | 0.80584400  |
| H | -3.60055100 | 0.90632800  | 1.58093900  |
| C | -1.16247600 | 1.08155000  | 0.27723500  |
| C | -1.26269800 | 1.93867300  | 1.52720900  |
| H | -0.37202500 | 2.56257000  | 1.64028700  |
| H | -2.12489500 | 2.60372400  | 1.44552400  |
| H | -1.37509000 | 1.32253300  | 2.42077700  |
| C | -0.75531800 | 1.88773100  | -0.96977400 |
| H | -1.13131900 | 1.40708600  | -1.87413000 |
| H | -1.16824100 | 2.89594900  | -0.92831800 |
| C | 0.77723800  | 1.87968900  | -0.95521000 |
| H | 1.20414100  | 2.74883800  | -0.43857400 |
| H | 1.23025300  | 1.84030300  | -1.94734500 |
| C | 2.35663900  | 0.00383600  | -0.01207800 |
| C | 3.48582700  | 0.50696100  | -0.68819300 |
| C | 2.46894600  | -1.14503500 | 0.79866100  |
| C | 4.70678900  | -0.12886600 | -0.55036500 |
| H | 3.40860200  | 1.39181900  | -1.31096700 |
| C | 3.69319200  | -1.77473100 | 0.92406900  |
| H | 1.59461200  | -1.52646000 | 1.31384800  |
| C | 4.80744100  | -1.26668900 | 0.25206400  |
| H | 5.58038900  | 0.25401800  | -1.06462300 |
| H | 3.78788300  | -2.65949800 | 1.54264900  |
| H | 5.76619600  | -1.76412900 | 0.35479700  |
| C | 1.09525600  | 0.66515300  | -0.14279800 |
| O | 0.08415900  | 0.22923800  | 0.49974700  |

### FMNsq

Electronic Energy: -872.77629006

Thermal correction to Gibbs Free Energy: 0.21126800

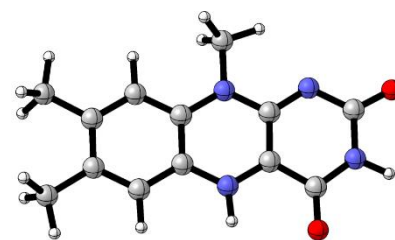

|   |             |             |             |
|---|-------------|-------------|-------------|
| C | 3.40993900  | -0.58885000 | 0.00007300  |
| C | 2.20041800  | -1.27849100 | 0.00007200  |
| C | 0.97052400  | -0.61651000 | -0.00000400 |
| C | 0.98496100  | 0.79122600  | -0.00007200 |
| C | 2.19387400  | 1.48588200  | -0.00008200 |
| C | 3.41050300  | 0.81935000  | -0.00001200 |
| C | -1.40143300 | 0.78214400  | -0.00005000 |
| C | -1.45686200 | -0.63527800 | -0.00000700 |
| C | -2.62221900 | 1.55821400  | -0.00000200 |
| H | 2.22455600  | -2.36122300 | 0.00013900  |
| H | 2.16903400  | 2.57233100  | -0.00015100 |
| C | 4.70834100  | -1.35158500 | 0.00012500  |
| H | 5.31329700  | -1.10739300 | 0.88004500  |
| H | 5.31280800  | -1.10830200 | -0.88039100 |
| H | 4.53630700  | -2.42989400 | 0.00072100  |
| C | 4.70312800  | 1.59113700  | 0.00002500  |
| H | 5.30978500  | 1.35213300  | -0.88000500 |
| H | 5.30911700  | 1.35311500  | 0.88079100  |
| H | 4.52189500  | 2.66801700  | -0.00063500 |
| N | -0.24775800 | -1.30957000 | -0.00002300 |
| C | -0.25143800 | -2.76449100 | 0.00002800  |
| H | 0.25303600  | -3.14484900 | 0.89316000  |
| H | 0.25316500  | -3.14490100 | -0.89300900 |
| H | -1.28961600 | -3.08867500 | -0.00003400 |
| N | -2.57302000 | -1.31689100 | 0.00004700  |
| C | -3.77812100 | -0.64630700 | 0.00007800  |
| O | -4.85758900 | -1.19956400 | -0.00010800 |
| N | -3.74472800 | 0.77010000  | 0.00009400  |
| H | -4.64414500 | 1.23071100  | 0.00002900  |
| N | -0.22510800 | 1.45315000  | -0.00015000 |
| O | -2.62619400 | 2.78555200  | -0.00006600 |
| H | -0.29437400 | 2.46486000  | -0.00007900 |

### FMNhq anion

Electronic Energy: -872.91296794

Thermal correction to Gibbs Free Energy: 0.20987200

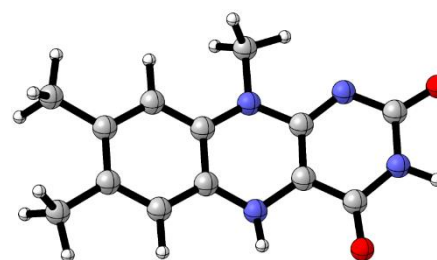

|   |            |             |            |
|---|------------|-------------|------------|
| C | 3.38682700 | -0.59466700 | 0.15027000 |
| C | 2.16422100 | -1.27069000 | 0.00642300 |



|   |             |             |             |
|---|-------------|-------------|-------------|
| C | 0.96191600  | -0.60610400 | -0.20672500 |
| C | 0.97929100  | 0.81123800  | -0.26599200 |
| C | 2.18965200  | 1.47615800  | -0.10066900 |
| C | 3.39796900  | 0.79708100  | 0.09764400  |
| C | -1.41116400 | 0.78860100  | -0.23190400 |
| C | -1.46613500 | -0.58776700 | -0.17869700 |
| C | -2.57636300 | 1.54588300  | 0.03086300  |
| H | 2.16765900  | -2.35395300 | 0.06200100  |
| H | 2.18697300  | 2.56357800  | -0.14239600 |
| C | 4.65944900  | -1.37605500 | 0.36199600  |
| H | 5.15017200  | -1.11259700 | 1.30788100  |
| H | 5.39248000  | -1.19086600 | -0.43399700 |
| H | 4.46137100  | -2.45155000 | 0.38271600  |
| C | 4.68365600  | 1.57027200  | 0.25215000  |
| H | 5.41371600  | 1.30456500  | -0.52284000 |
| H | 5.16423300  | 1.37190600  | 1.21847300  |
| H | 4.50646700  | 2.64732700  | 0.18518100  |
| N | -0.25429200 | -1.28787100 | -0.38588900 |
| C | -0.26502500 | -2.72888200 | -0.33627800 |
| H | 0.09358900  | -3.11430100 | 0.63088500  |
| H | 0.37226100  | -3.13996300 | -1.12900200 |
| H | -1.29619300 | -3.05066900 | -0.47093800 |
| N | -2.55861200 | -1.31788100 | 0.04721500  |
| C | -3.73446000 | -0.66211000 | 0.25437400  |
| O | -4.81983400 | -1.21138400 | 0.44903600  |
| N | -3.68988600 | 0.74463400  | 0.25639100  |
| H | -4.56359000 | 1.21505500  | 0.43589200  |
| N | -0.20203000 | 1.47199000  | -0.53822700 |
| O | -2.63968300 | 2.78709800  | 0.06500000  |
| H | -0.25827000 | 2.45190400  | -0.29329700 |

### FMNhq

Electronic Energy: -873.38683846

Thermal correction to Gibbs Free Energy: 0.22330800

|   |             |             |             |
|---|-------------|-------------|-------------|
| C | 3.36911100  | -0.59878600 | 0.25098500  |
| C | 2.15846700  | -1.27603100 | 0.06483100  |
| C | 0.99146600  | -0.60281300 | -0.26227800 |
| C | 1.00760400  | 0.79788700  | -0.36784500 |
| C | 2.20355400  | 1.47124700  | -0.16299700 |
| C | 3.39023700  | 0.79423700  | 0.13148800  |
| C | -1.36592100 | 0.79543000  | -0.31299600 |
| C | -1.38593100 | -0.55816900 | -0.23987200 |
| C | -2.52903700 | 1.57038600  | 0.01789100  |

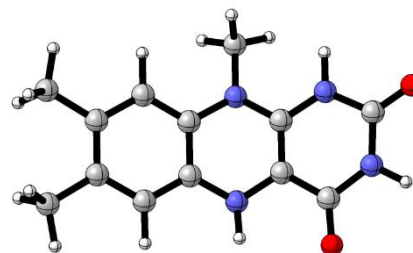

|   |             |             |             |
|---|-------------|-------------|-------------|
| H | 2.14423700  | -2.35525400 | 0.17976400  |
| H | 2.21179500  | 2.55482700  | -0.24927900 |
| C | 4.62263400  | -1.36832200 | 0.57866700  |
| H | 5.05108700  | -1.05119400 | 1.53607400  |
| H | 5.39736100  | -1.21832100 | -0.18183300 |
| H | 4.42431400  | -2.44103500 | 0.64285500  |
| C | 4.67057400  | 1.56494700  | 0.32328000  |
| H | 5.43678400  | 1.25134700  | -0.39441600 |
| H | 5.08707500  | 1.40580500  | 1.32415100  |
| H | 4.51119900  | 2.63783000  | 0.19436900  |
| N | -0.24068200 | -1.28150800 | -0.50072600 |
| C | -0.26466100 | -2.71254800 | -0.69425000 |
| H | -0.19194100 | -3.28109800 | 0.24432700  |
| H | 0.57470400  | -2.99598100 | -1.33272000 |
| H | -1.17855000 | -2.99922600 | -1.21996100 |
| N | -2.54799700 | -1.21761700 | 0.10622600  |
| C | -3.73989400 | -0.57431300 | 0.40994600  |
| O | -4.74163100 | -1.18268500 | 0.72713800  |
| N | -3.66020400 | 0.79785300  | 0.32183000  |
| H | -4.50417400 | 1.30424800  | 0.55046700  |
| N | -0.18296700 | 1.45310800  | -0.70869900 |
| O | -2.57449000 | 2.79171200  | 0.02286500  |
| H | -0.22201400 | 2.44568500  | -0.51556800 |
| H | -2.55915600 | -2.21160700 | 0.27022300  |

## H<sub>2</sub>O

Electronic Energy: -76.44526872

Thermal correction to Gibbs Free Energy: 0.00355900

|   |             |             |            |
|---|-------------|-------------|------------|
| O | 0.00000000  | 0.11786000  | 0.00000000 |
| H | 0.75782400  | -0.47142700 | 0.00000000 |
| H | -0.75782400 | -0.47144900 | 0.00000000 |

## TS-1

Electronic Energy: -733.22862083

Thermal correction to Gibbs Free Energy: 0.25048300

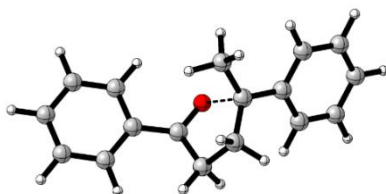

|   |             |             |             |
|---|-------------|-------------|-------------|
| C | -2.41333700 | -0.08872700 | 0.28546800  |
| C | -2.84196400 | 0.95278100  | -0.55459900 |
| C | -4.51754500 | -1.22301700 | -0.15332400 |
| C | -4.07907700 | 0.90692000  | -1.17951500 |
| H | -2.18589100 | 1.79822700  | -0.73557000 |
| C | -4.92667000 | -0.18126100 | -0.97962700 |
| H | -5.16982000 | -2.07498600 | 0.01126200  |
| H | -4.38361700 | 1.72107300  | -1.82977200 |
| H | -5.89639700 | -0.21604600 | -1.46555400 |
| C | -3.27427800 | -1.18080200 | 0.46718800  |
| H | -2.98019300 | -2.00132700 | 1.11273700  |
| C | -1.09034900 | -0.02777900 | 0.91887700  |
| C | -0.59963600 | -1.20733600 | 1.70812800  |
| H | 0.47369300  | -1.10622500 | 1.89609700  |
| H | -1.10171200 | -1.26451600 | 2.68379600  |
| H | -0.76226800 | -2.14877800 | 1.17941600  |
| C | -0.55441900 | 1.31489200  | 1.36742900  |
| H | -1.35936500 | 2.04572200  | 1.46800900  |
| H | -0.09026000 | 1.20659900  | 2.35223500  |
| C | 0.52983400  | 1.84659200  | 0.36199500  |
| H | 1.27921300  | 2.45889200  | 0.86718200  |
| H | 0.03420900  | 2.46764500  | -0.39183400 |
| C | 2.44686000  | 0.17789500  | -0.29481000 |
| C | 3.50579500  | 1.06419300  | -0.03358300 |
| C | 2.75208400  | -1.15825300 | -0.61458900 |
| C | 4.82187700  | 0.62248700  | -0.07243900 |
| H | 3.30108800  | 2.10641500  | 0.18955100  |
| C | 4.06710900  | -1.59331100 | -0.64651700 |
| H | 1.93192500  | -1.83453700 | -0.82927600 |

|   |            |             |             |
|---|------------|-------------|-------------|
| C | 5.10987700 | -0.70645200 | -0.37488000 |
| H | 5.62840200 | 1.31968600  | 0.13235000  |
| H | 4.28550600 | -2.62937000 | -0.88635700 |
| H | 6.13948900 | -1.04821300 | -0.40440600 |
| C | 1.05171700 | 0.60161800  | -0.28011000 |
| O | 0.11609100 | -0.19036300 | -0.61255500 |

### TS-2

Electronic Energy: -76.44526872

Thermal correction to Gibbs Free Energy: 0.00355900

|   |             |             |             |
|---|-------------|-------------|-------------|
| C | -0.51006300 | 0.63076700  | -0.11488400 |
| C | -0.99031400 | 1.86074200  | 0.41591800  |
| C | 0.76869400  | 1.93029500  | -1.73987500 |
| C | -0.62927900 | 3.06943500  | -0.13850600 |
| H | -1.65999200 | 1.84926400  | 1.26781600  |
| C | 0.24934700  | 3.11575700  | -1.22809300 |
| H | 1.47360700  | 1.95984200  | -2.56295200 |
| H | -1.01729400 | 3.99047700  | 0.28417800  |
| H | 0.51839900  | 4.06719200  | -1.67441900 |
| C | 3.27316300  | 3.30080200  | -0.09124700 |
| C | 3.80090500  | 2.15646800  | -0.70718100 |
| C | 3.52919300  | 0.88704800  | -0.23094100 |
| C | 2.69194000  | 0.69790600  | 0.91026400  |
| C | 2.19346400  | 1.86807000  | 1.52373200  |
| C | 2.47954300  | 3.14223600  | 1.05645700  |
| C | 2.75487700  | -1.59739700 | 0.64473500  |
| C | 3.59136100  | -1.48945700 | -0.44480400 |
| C | 2.30851900  | -2.92831800 | 1.03308700  |
| H | 4.41436300  | 2.28513100  | -1.59407800 |
| H | 1.57326000  | 1.73340200  | 2.40452000  |
| C | 3.61104900  | 4.66842300  | -0.62501800 |
| H | 2.71276900  | 5.26455200  | -0.82160100 |
| H | 4.21852000  | 5.24200200  | 0.08580600  |
| H | 4.17477300  | 4.60076100  | -1.55937400 |
| C | 1.92392000  | 4.34596500  | 1.77033700  |
| H | 2.72415800  | 4.98633900  | 2.15832000  |
| H | 1.31807800  | 4.96367800  | 1.09740300  |
| H | 1.29233300  | 4.04768000  | 2.60991200  |
| N | 4.10745000  | -0.27083900 | -0.81283200 |
| C | 5.26026300  | -0.14754200 | -1.67859300 |

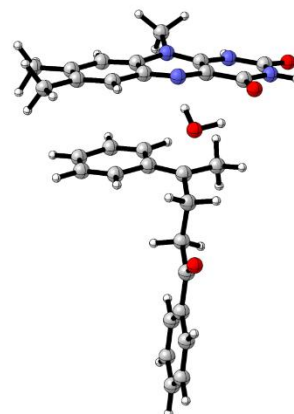

|   |             |             |             |
|---|-------------|-------------|-------------|
| H | 4.98808900  | 0.04829000  | -2.72420700 |
| H | 5.87948600  | 0.67959600  | -1.32410100 |
| H | 5.87319400  | -1.04972800 | -1.62801000 |
| N | 3.96866700  | -2.59560500 | -1.17982300 |
| C | 3.57109400  | -3.89096200 | -0.89684100 |
| O | 3.89650200  | -4.83788100 | -1.58632800 |
| N | 2.77905500  | -3.97383000 | 0.22086000  |
| H | 2.47526500  | -4.90145100 | 0.48188600  |
| N | 2.35968800  | -0.51335300 | 1.39659300  |
| O | 1.58465700  | -3.20818700 | 1.98075200  |
| C | 0.43515600  | 0.71382000  | -1.17397400 |
| H | 0.86384800  | -0.19166000 | -1.58781500 |
| C | -1.01388200 | -0.61674200 | 0.33978600  |
| C | -0.54238100 | -1.88919800 | -0.28366500 |
| H | -0.83039400 | -2.74904400 | 0.32097200  |
| H | 0.54120000  | -1.91165300 | -0.42494600 |
| H | -0.99924900 | -1.99937600 | -1.27670900 |
| C | -2.33386700 | -0.68311800 | 1.05714400  |
| H | -2.38863700 | 0.04008700  | 1.86987200  |
| H | -2.45106300 | -1.66082700 | 1.52516600  |
| C | -3.48276500 | -0.44508800 | 0.06870900  |
| H | -3.38457600 | 0.54041600  | -0.40346500 |
| H | -3.45570900 | -1.17518800 | -0.75064000 |
| C | -6.06828600 | -0.32019900 | -0.10022600 |
| C | -6.00839700 | -0.03217300 | -1.46676000 |
| C | -7.31488900 | -0.42008200 | 0.52489900  |
| C | -7.17830800 | 0.15251300  | -2.19571700 |
| H | -5.05185900 | 0.05235600  | -1.97203400 |
| C | -8.48211600 | -0.23655600 | -0.20315200 |
| H | -7.34071100 | -0.64327000 | 1.58595100  |
| C | -8.41491600 | 0.05011900  | -1.56524300 |
| H | -7.12450500 | 0.37664900  | -3.25603300 |
| H | -9.44593900 | -0.31642400 | 0.28894500  |
| H | -9.32719900 | 0.19405900  | -2.13553100 |
| C | -4.84398100 | -0.52876500 | 0.74051000  |
| O | -4.94004700 | -0.75665800 | 1.93044100  |
| O | -0.07240800 | -0.94582400 | 2.47338300  |
| H | 0.10309400  | -1.88846500 | 2.60616200  |
| H | 0.83743500  | -0.65862500 | 2.19440700  |
| H | 4.46734800  | -2.50089800 | -2.05011800 |

4

Electronic Energy: -809.14478852

Thermal correction to Gibbs Free Energy: 0.26548000

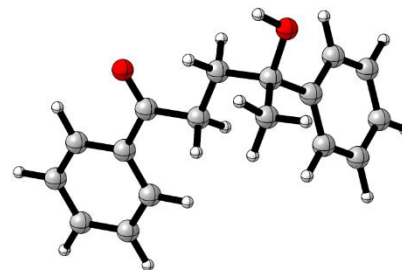

|   |             |             |             |
|---|-------------|-------------|-------------|
| C | -2.63097000 | 0.10272100  | 0.09822400  |
| C | -2.39209100 | 1.18756400  | 0.94406300  |
| C | -3.55415000 | 1.63670900  | -1.53467500 |
| C | -2.72723300 | 2.48241600  | 0.55627800  |
| H | -1.94151700 | 1.03204400  | 1.91892800  |
| C | -3.30932500 | 2.71213400  | -0.68511200 |
| H | -4.01281100 | 1.80350500  | -2.50441800 |
| H | -2.53550600 | 3.31133800  | 1.23063600  |
| H | -3.57333300 | 3.72056000  | -0.98744600 |
| C | -3.21675700 | 0.34515300  | -1.14693700 |
| H | -3.41830000 | -0.49489500 | -1.80144200 |
| C | -2.20822700 | -1.31865200 | 0.45789700  |
| C | -2.20176600 | -1.57580000 | 1.96865400  |
| H | -1.44446800 | -0.99328700 | 2.49983500  |
| H | -1.98540700 | -2.63322300 | 2.15358900  |
| H | -3.18115300 | -1.34340900 | 2.39253400  |
| C | -0.83508100 | -1.63389500 | -0.17551700 |
| H | -0.96231700 | -1.62786800 | -1.26234200 |
| H | -0.54639700 | -2.65653800 | 0.09867200  |
| C | 0.29167900  | -0.68225400 | 0.20064200  |
| H | 0.05794400  | 0.33479100  | -0.13546400 |
| H | 0.41343000  | -0.61440700 | 1.28980700  |
| C | 2.81792600  | -0.21523500 | -0.14072900 |
| C | 2.73748900  | 0.97876500  | 0.58186300  |
| C | 4.05141300  | -0.61891100 | -0.66031600 |
| C | 3.87410200  | 1.75512000  | 0.78126000  |
| H | 1.78983200  | 1.31343000  | 0.99090700  |
| C | 5.18556900  | 0.15584200  | -0.46086300 |
| H | 4.09352800  | -1.54750000 | -1.21912600 |
| C | 5.09797700  | 1.34468700  | 0.26093200  |
| H | 3.80389600  | 2.68149700  | 1.34192900  |
| H | 6.13936200  | -0.16458300 | -0.86736300 |
| H | 5.98412200  | 1.95184400  | 0.41719600  |
| C | 1.62844100  | -1.09596400 | -0.38787900 |
| O | 1.74081900  | -2.11761200 | -1.03862400 |
| O | -3.17782600 | -2.17737800 | -0.13903200 |
| H | -2.83882000 | -3.07578900 | -0.08189500 |

## Proposed mechanism

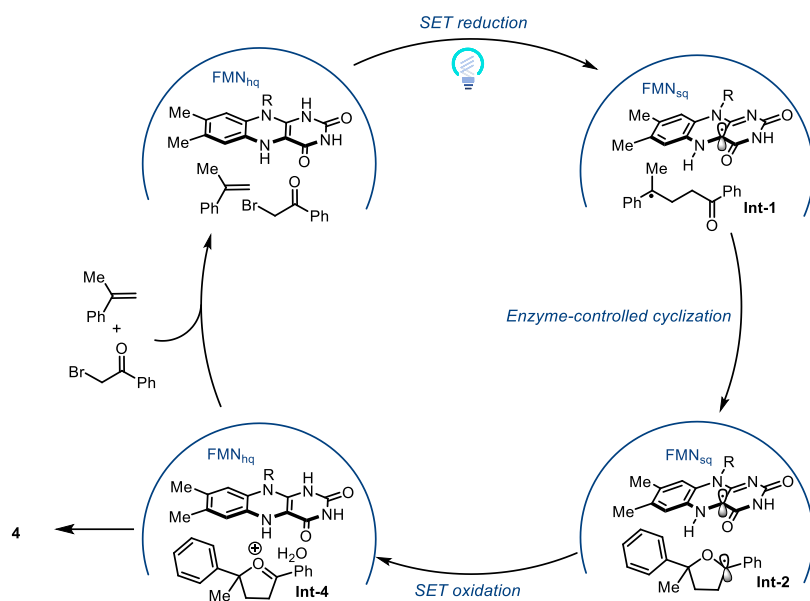

Supplementary Figure 10. Proposed mechanism for photoenzymatic carbohydroxylation.

### 3. NMR spectra

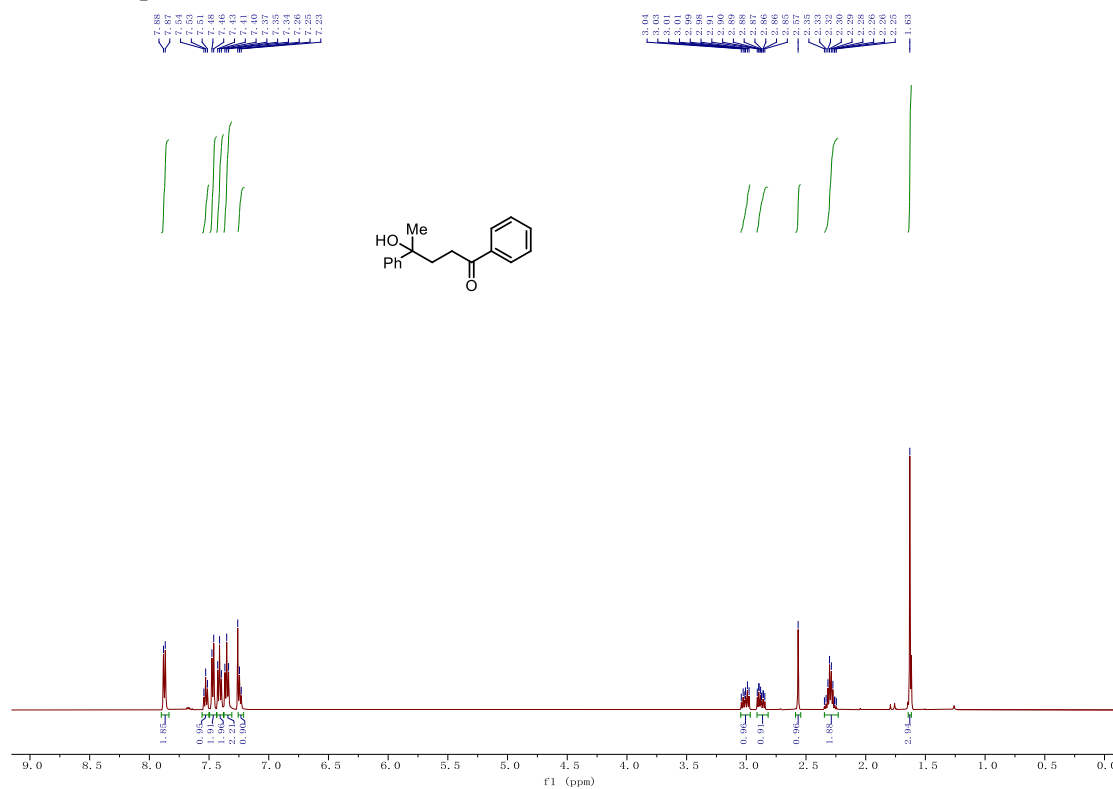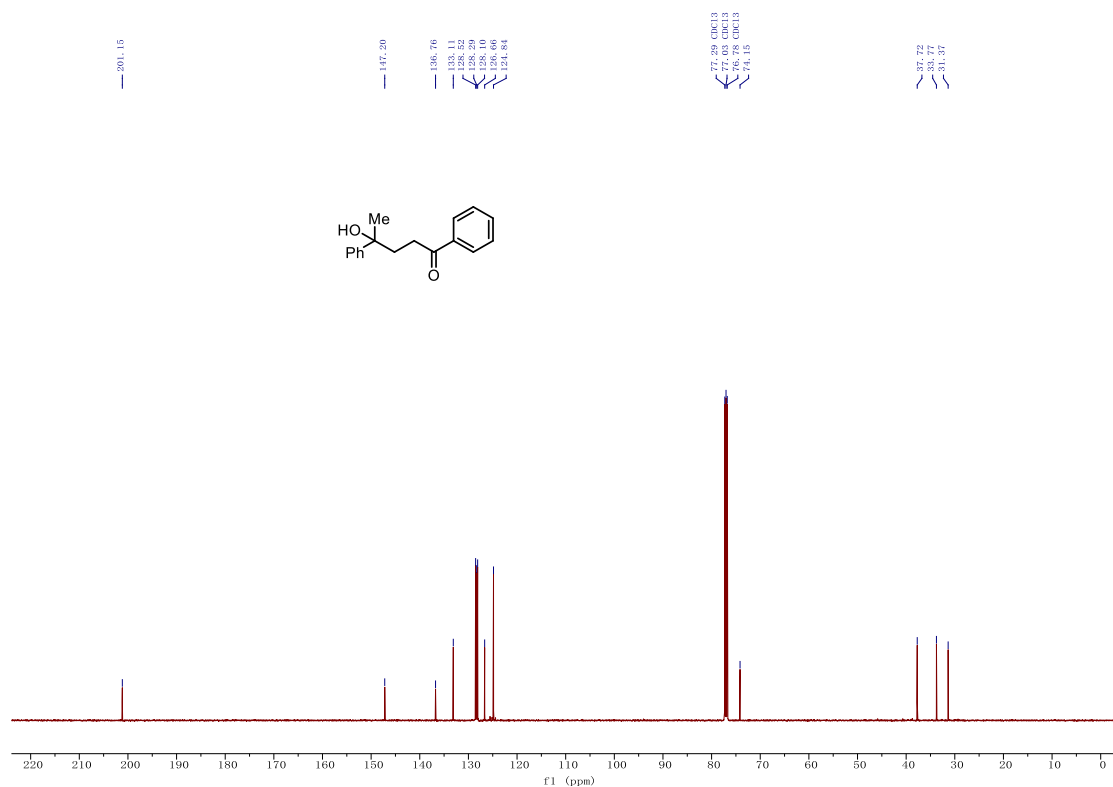



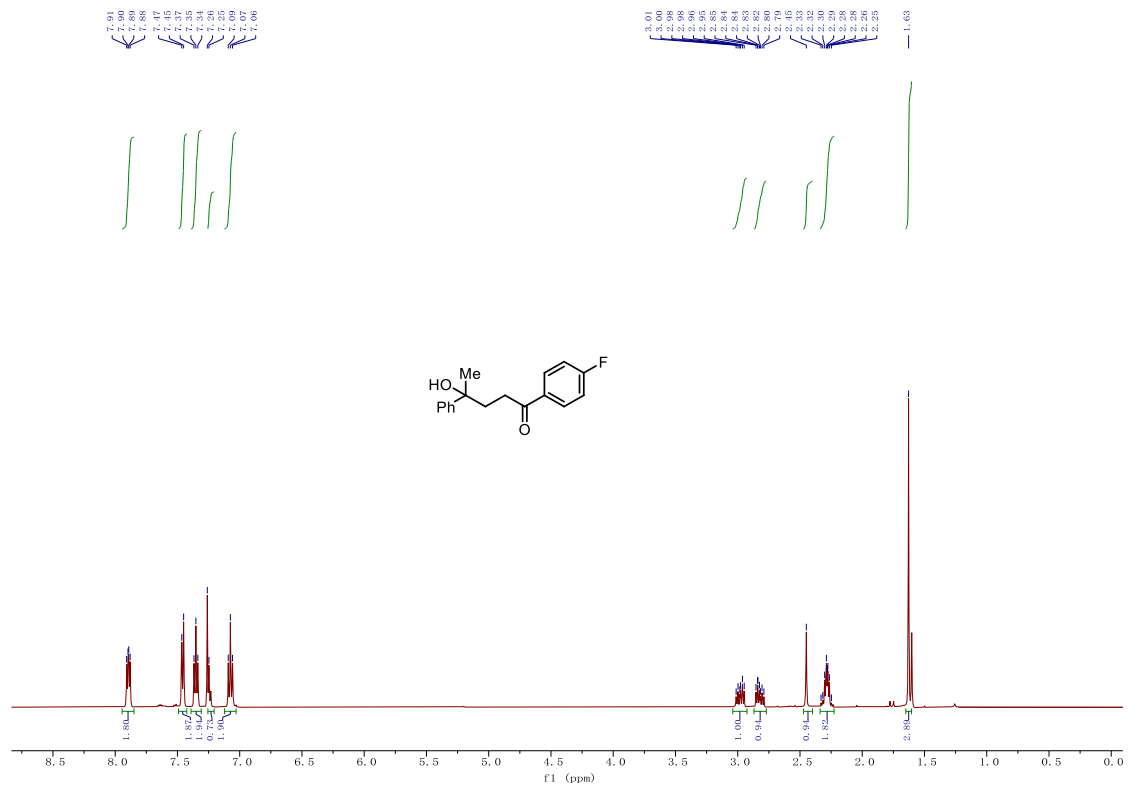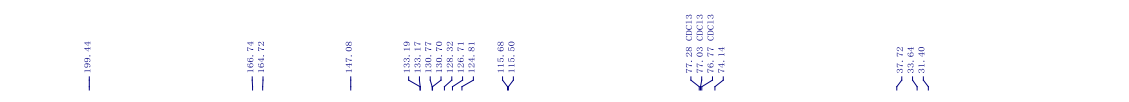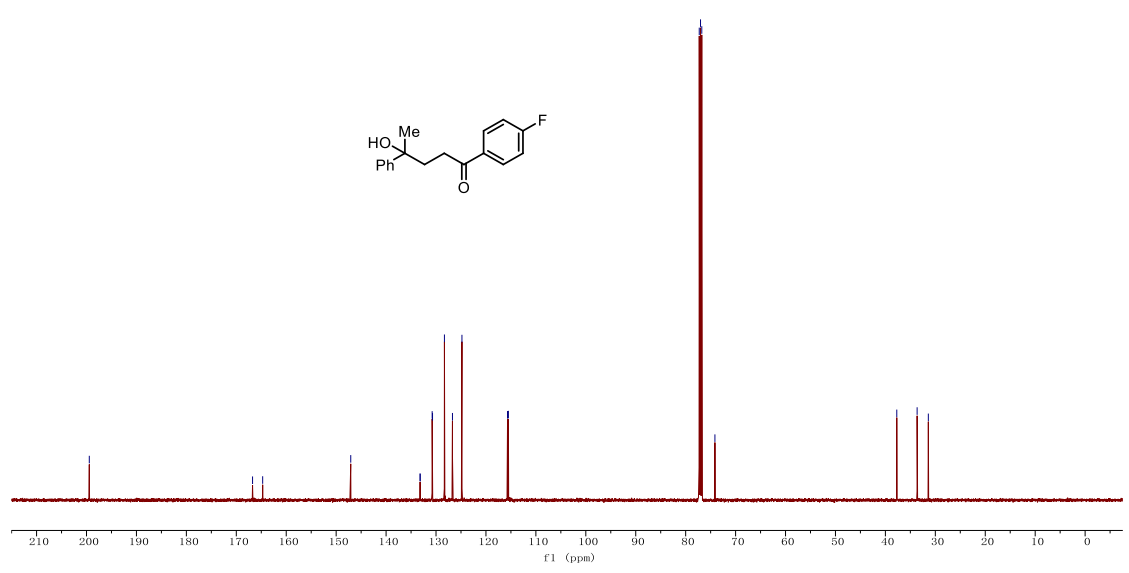

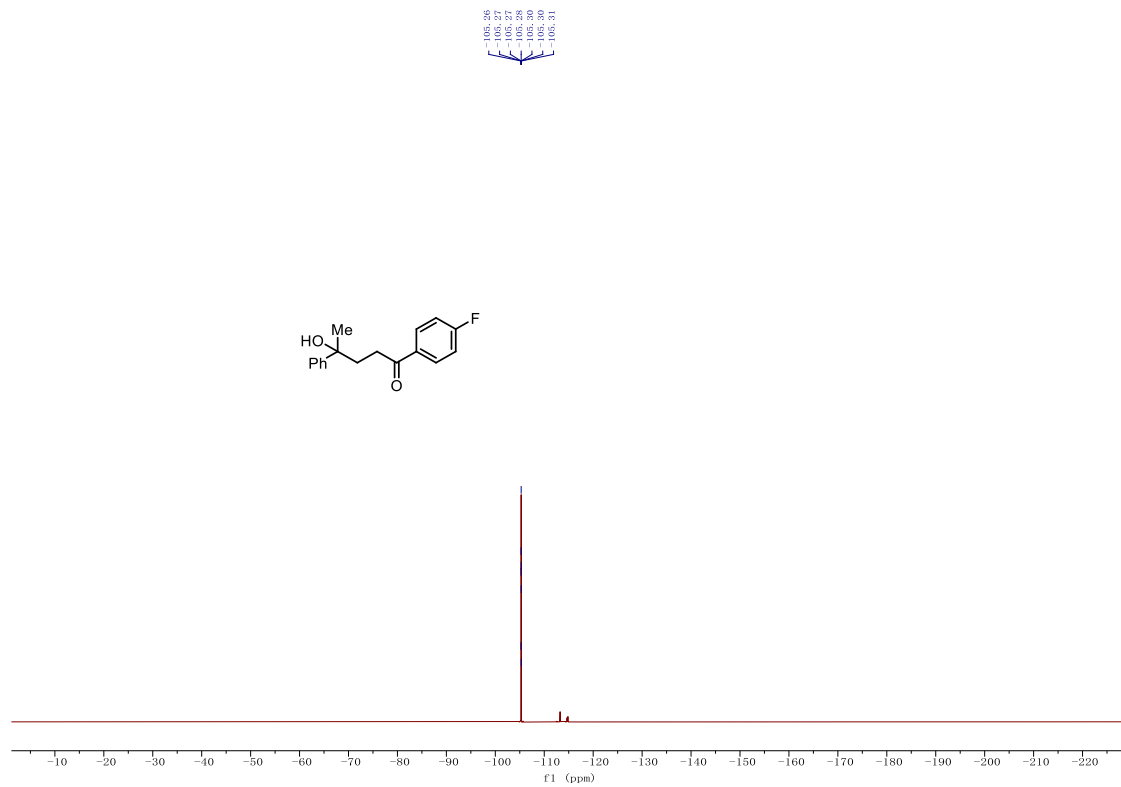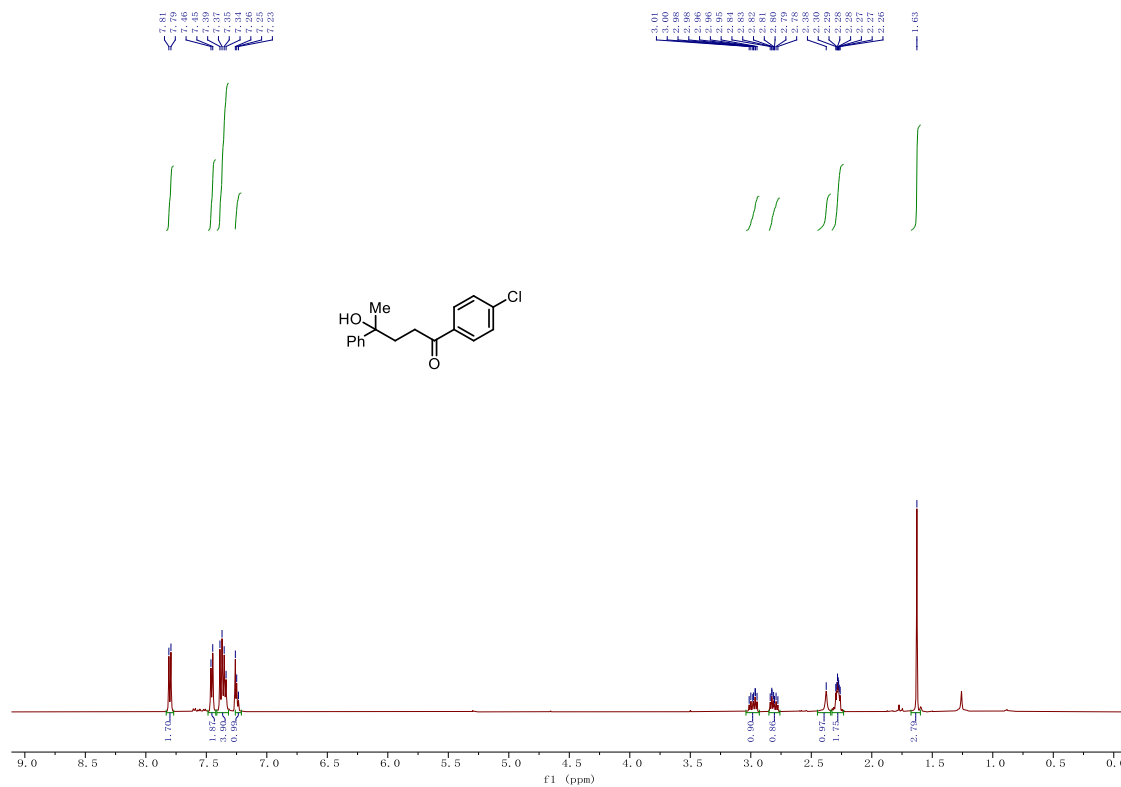

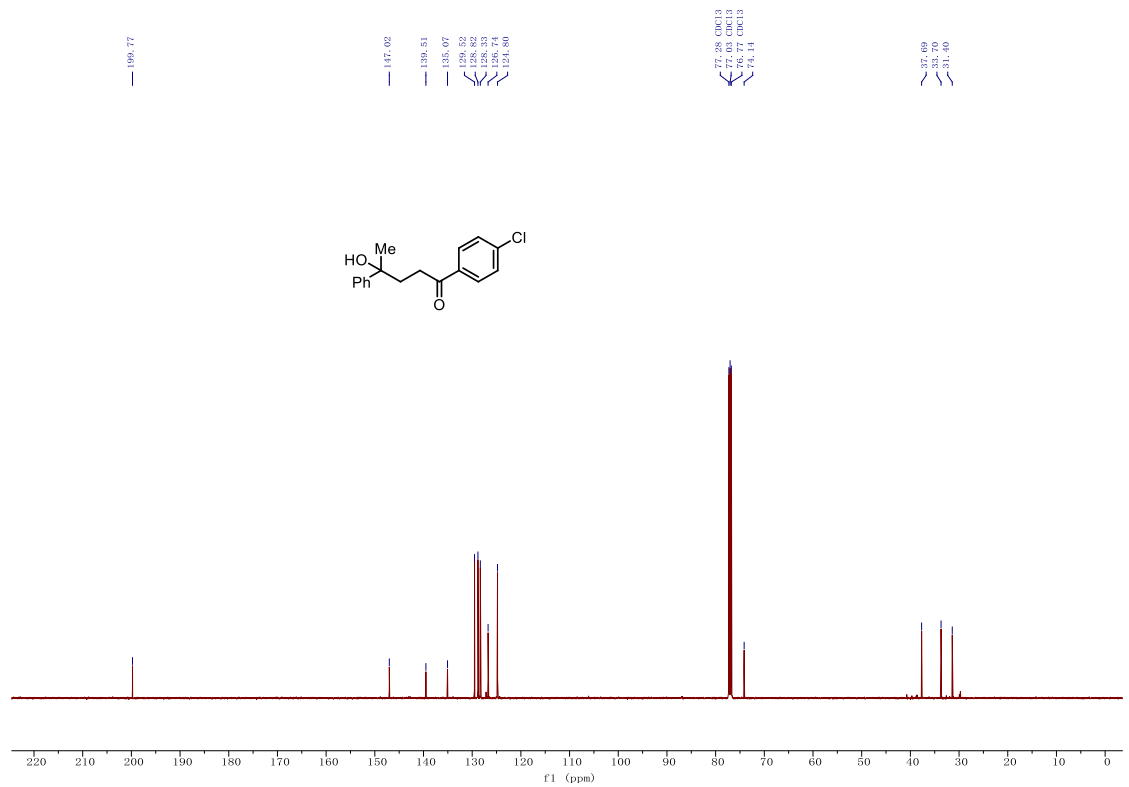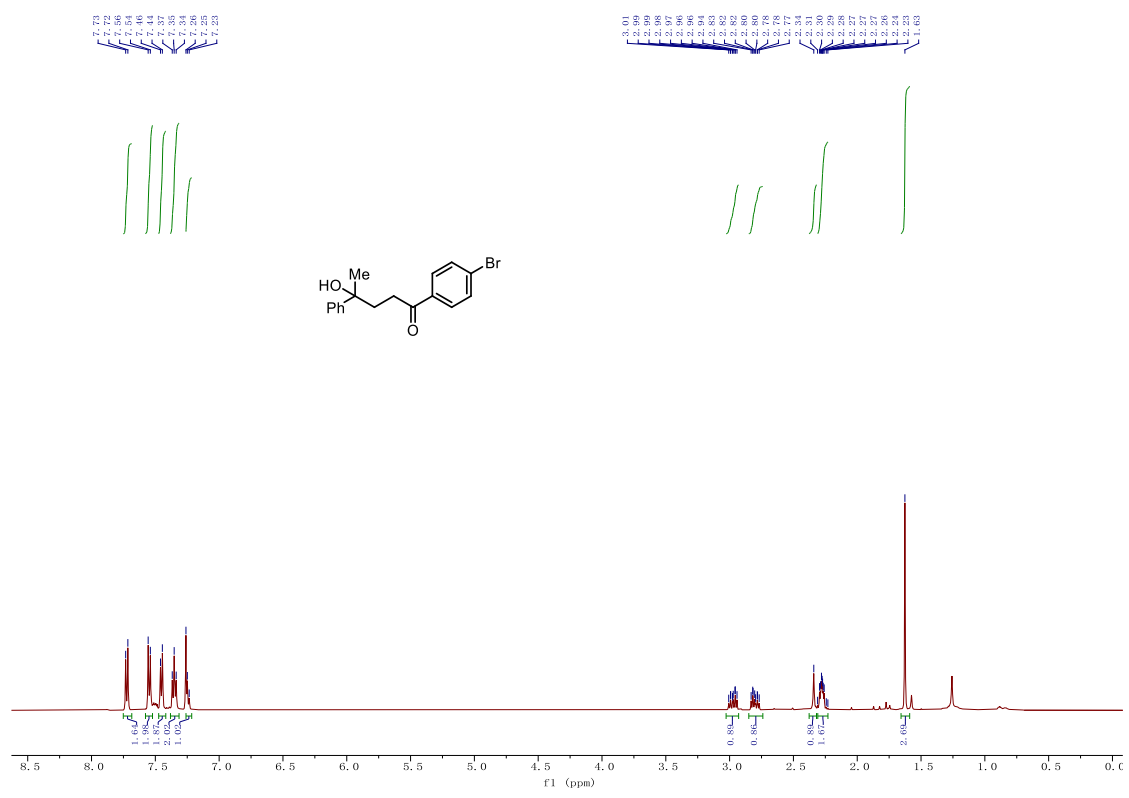

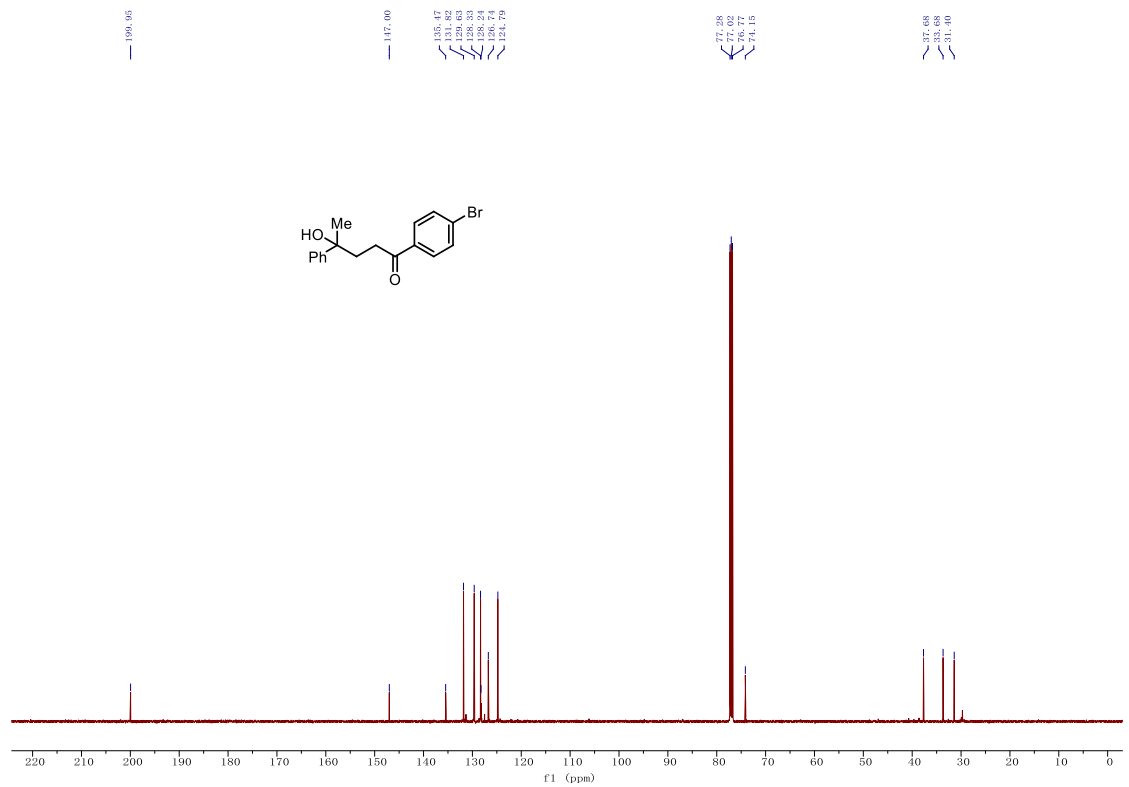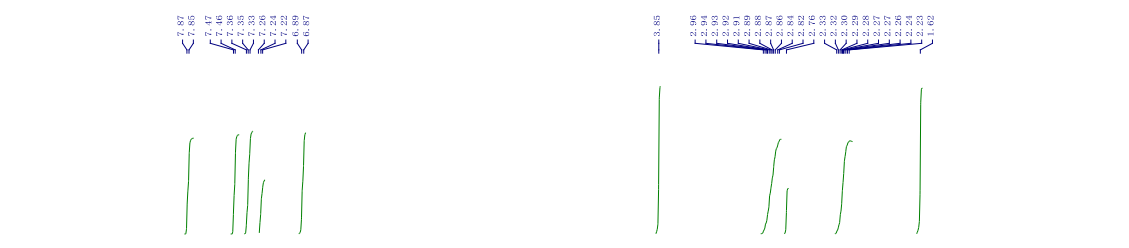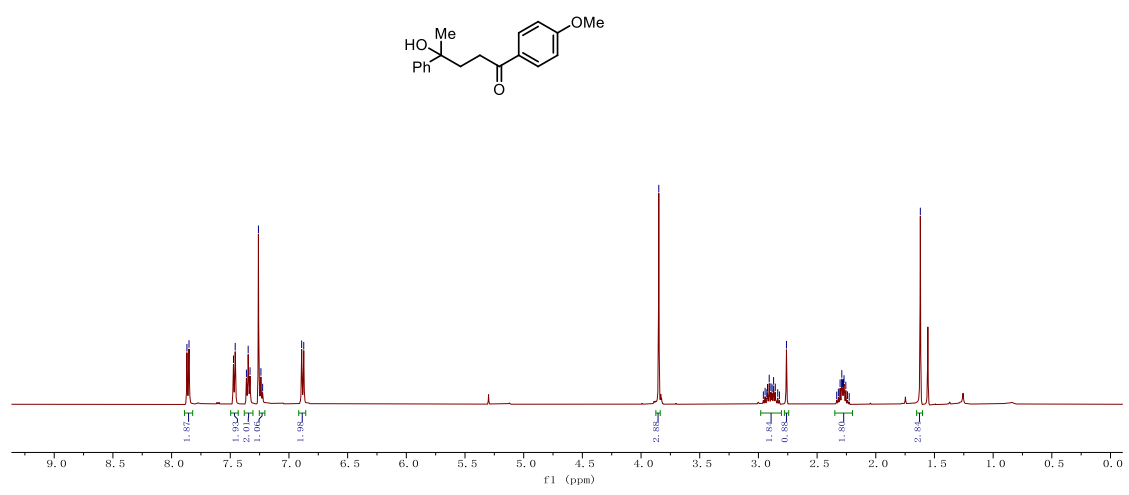

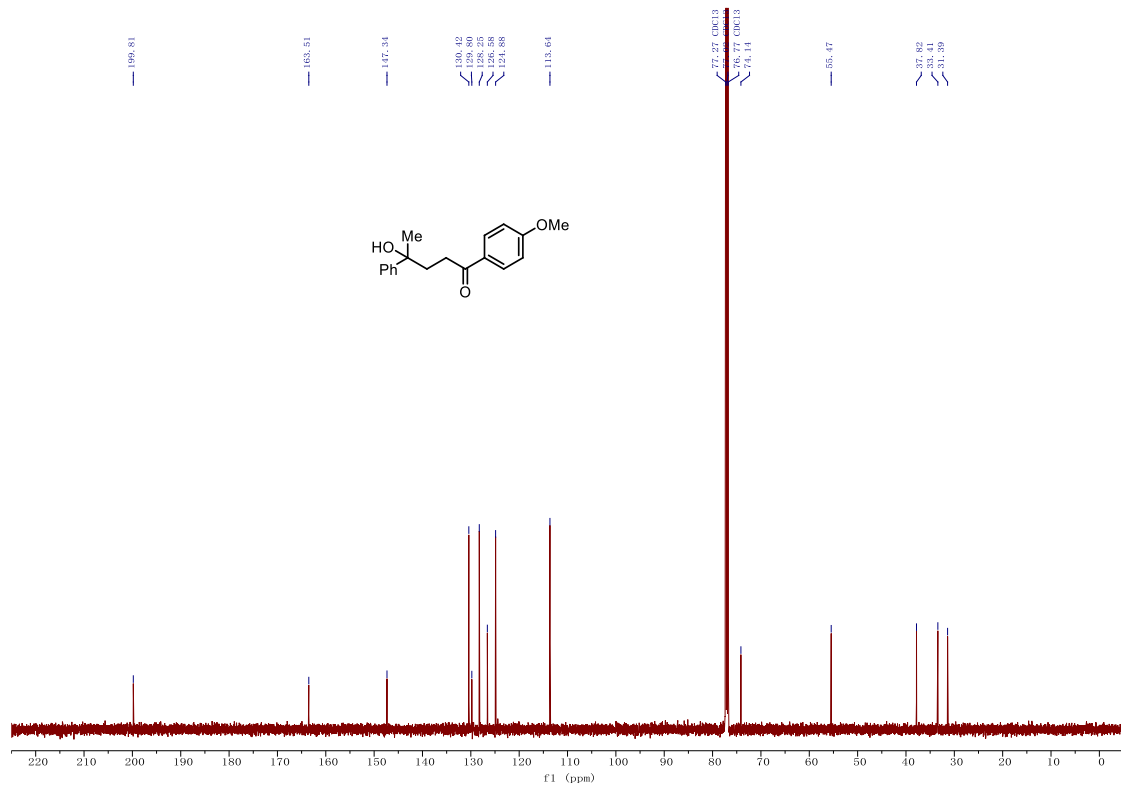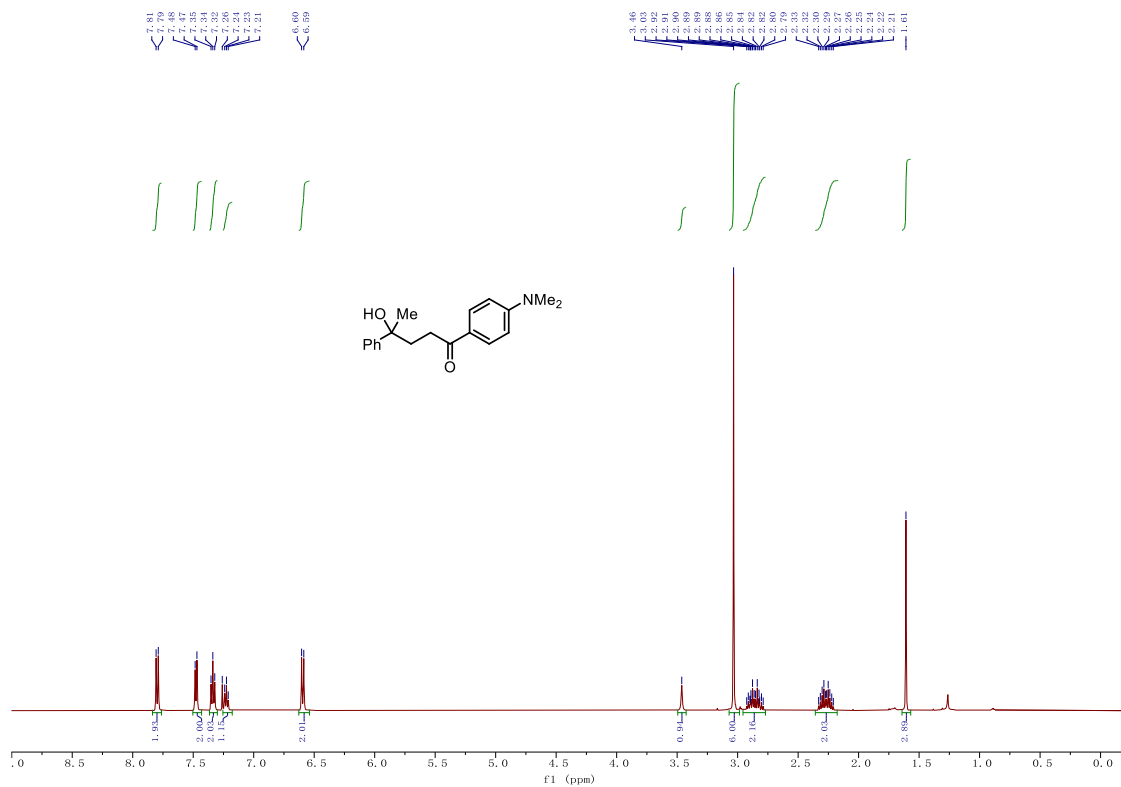

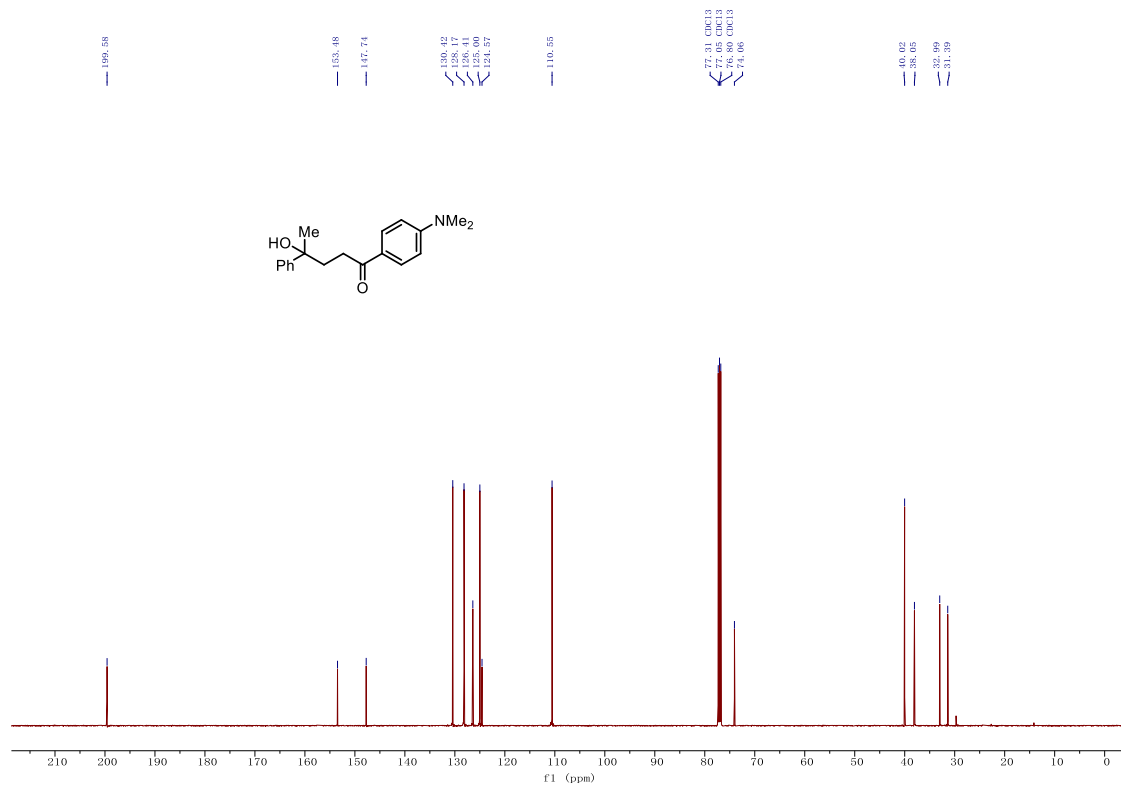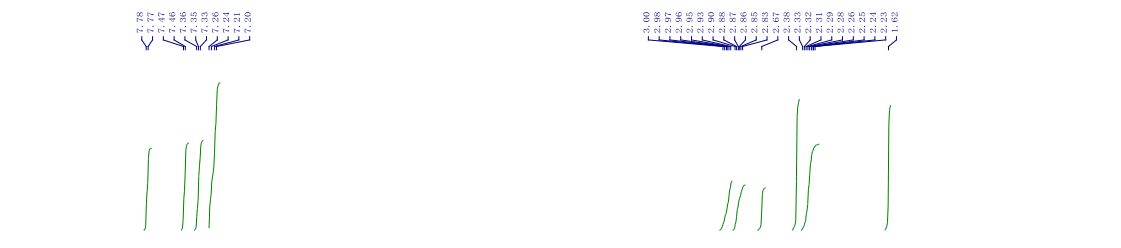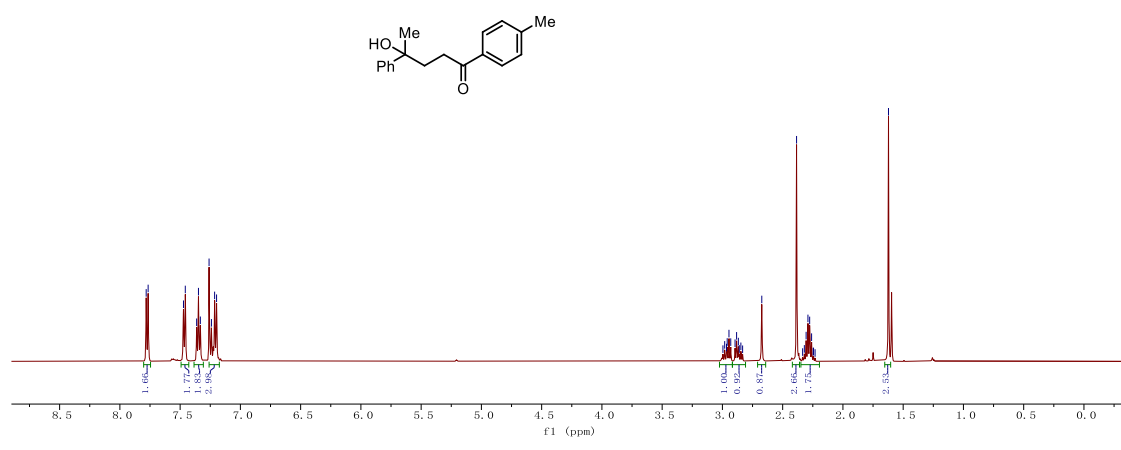

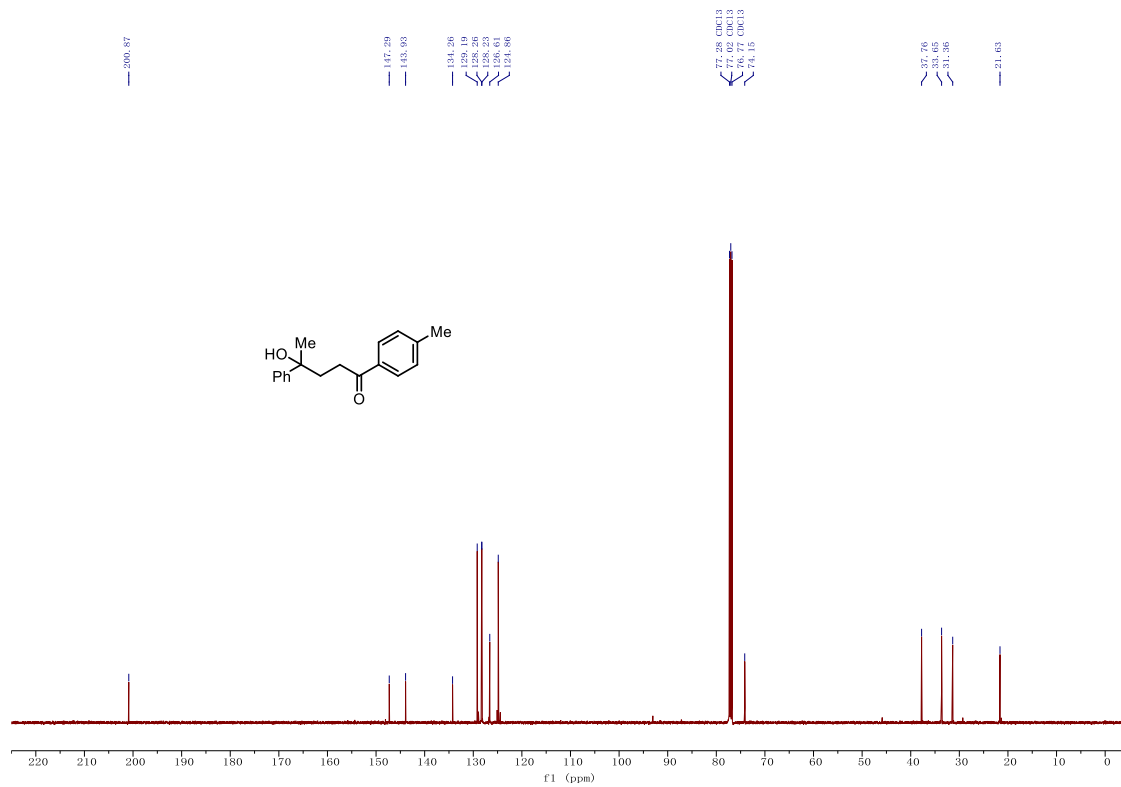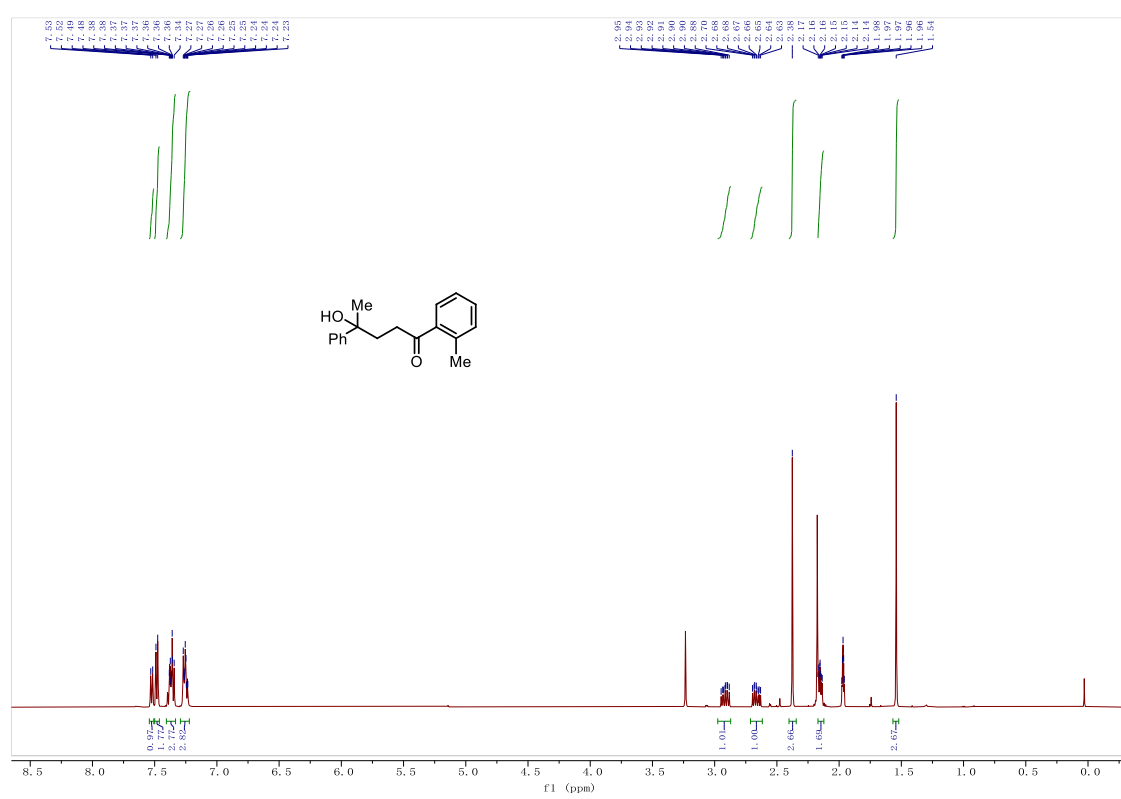

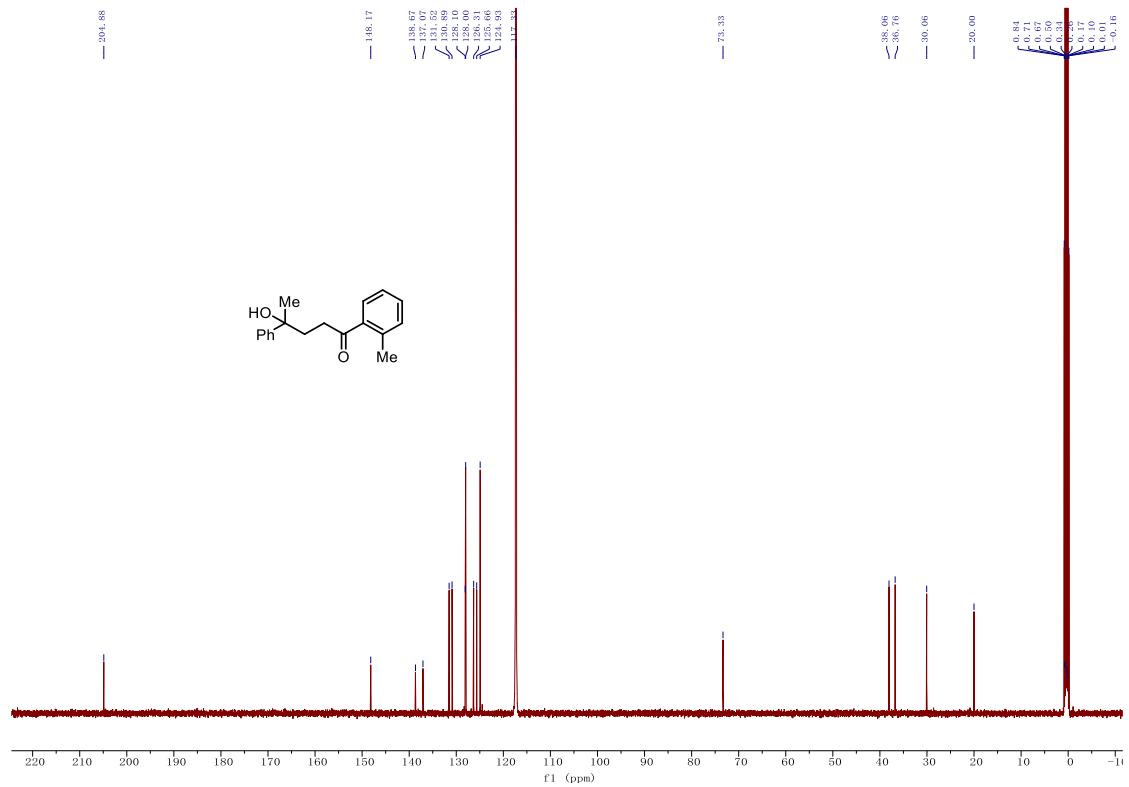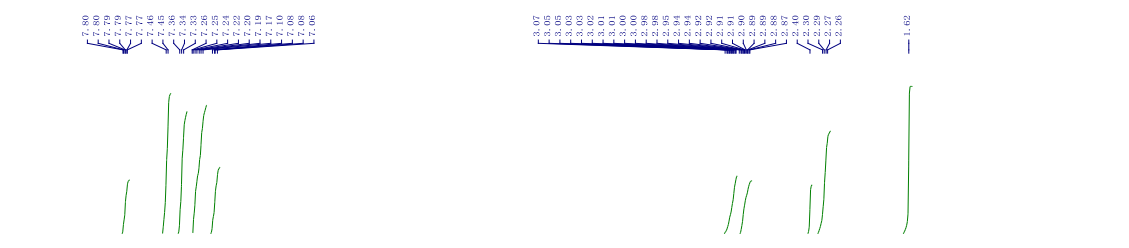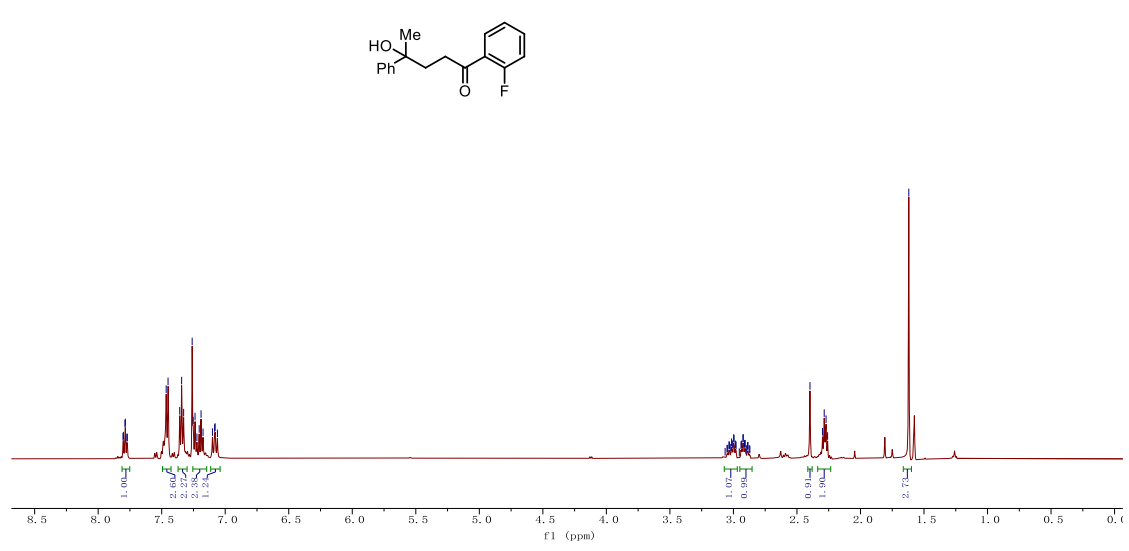



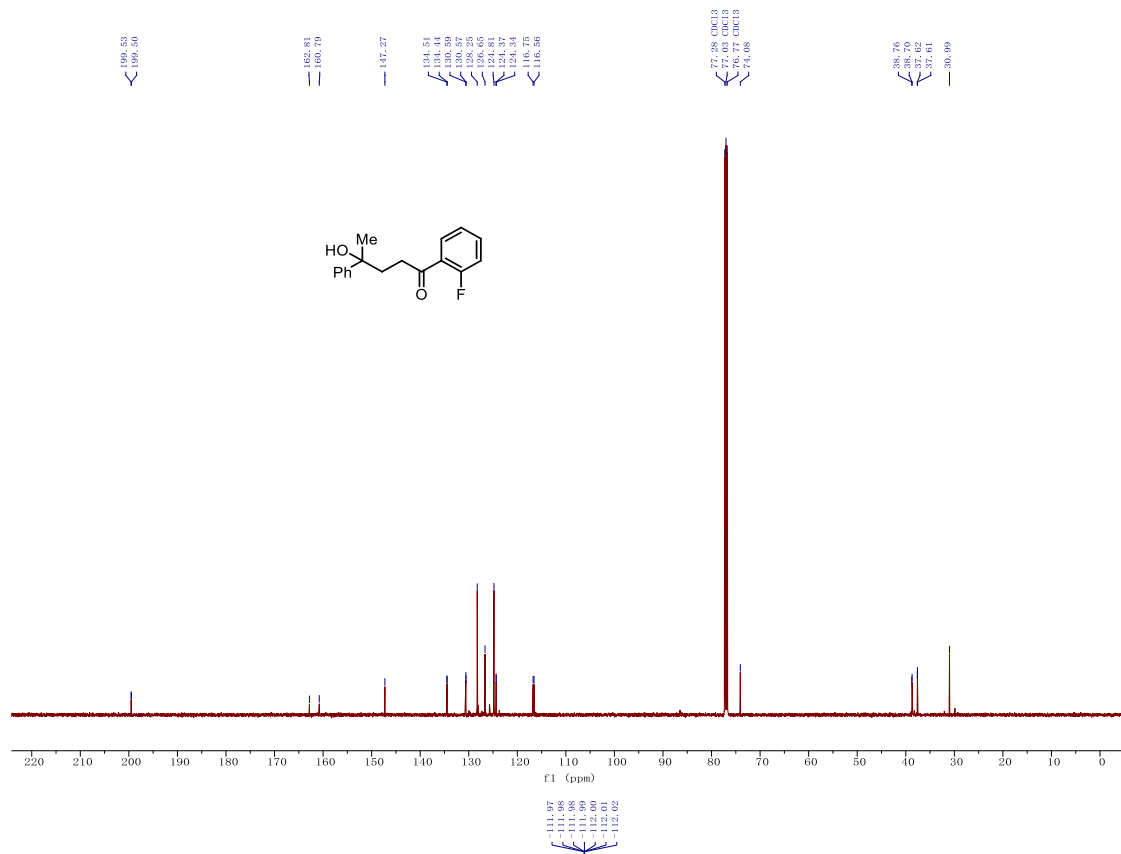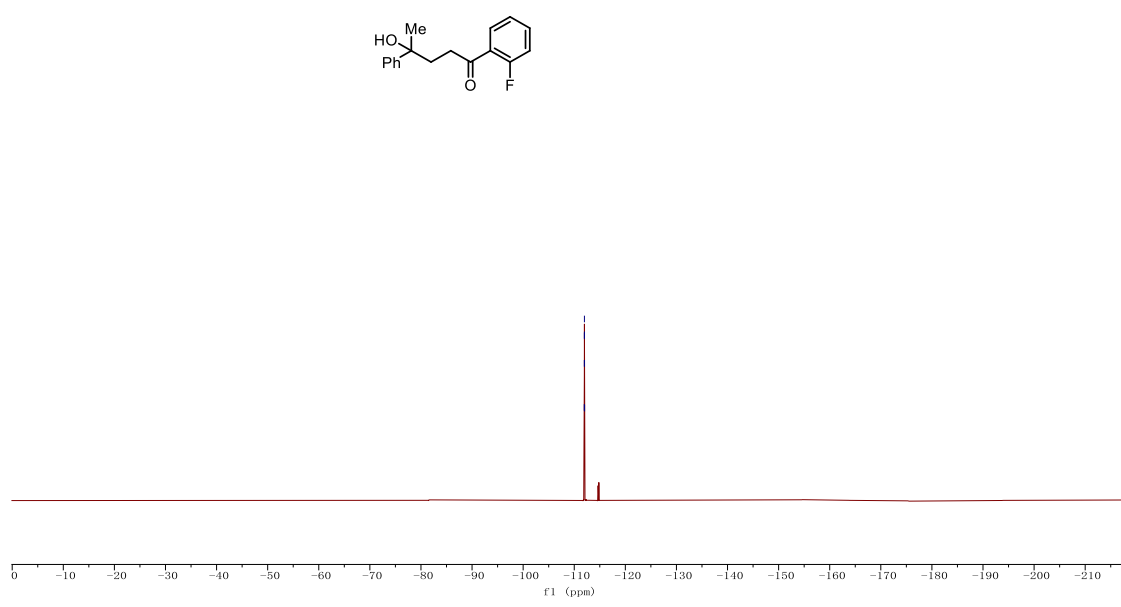

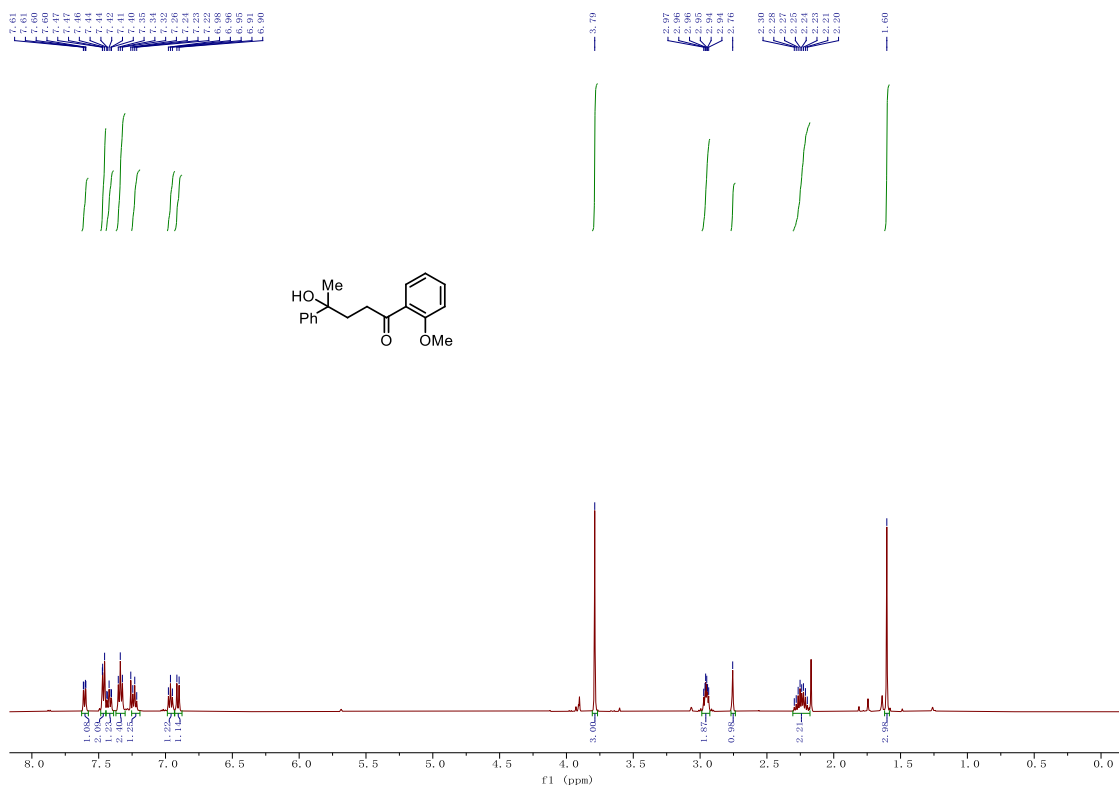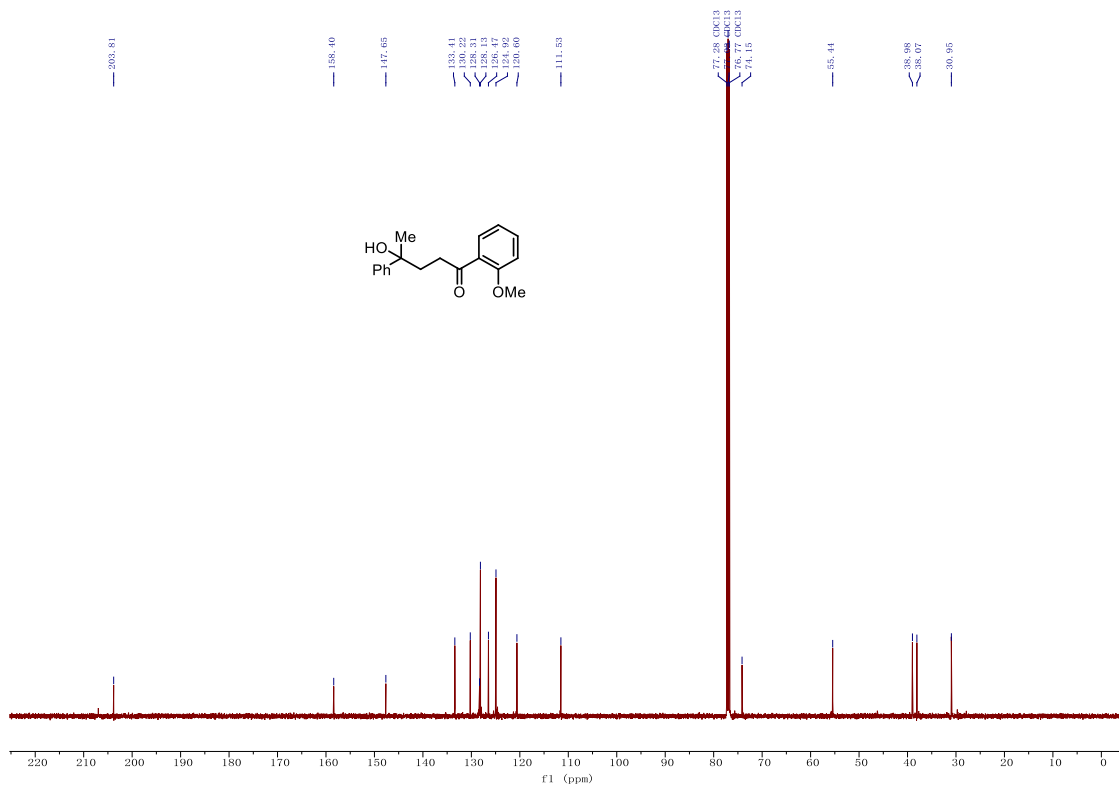

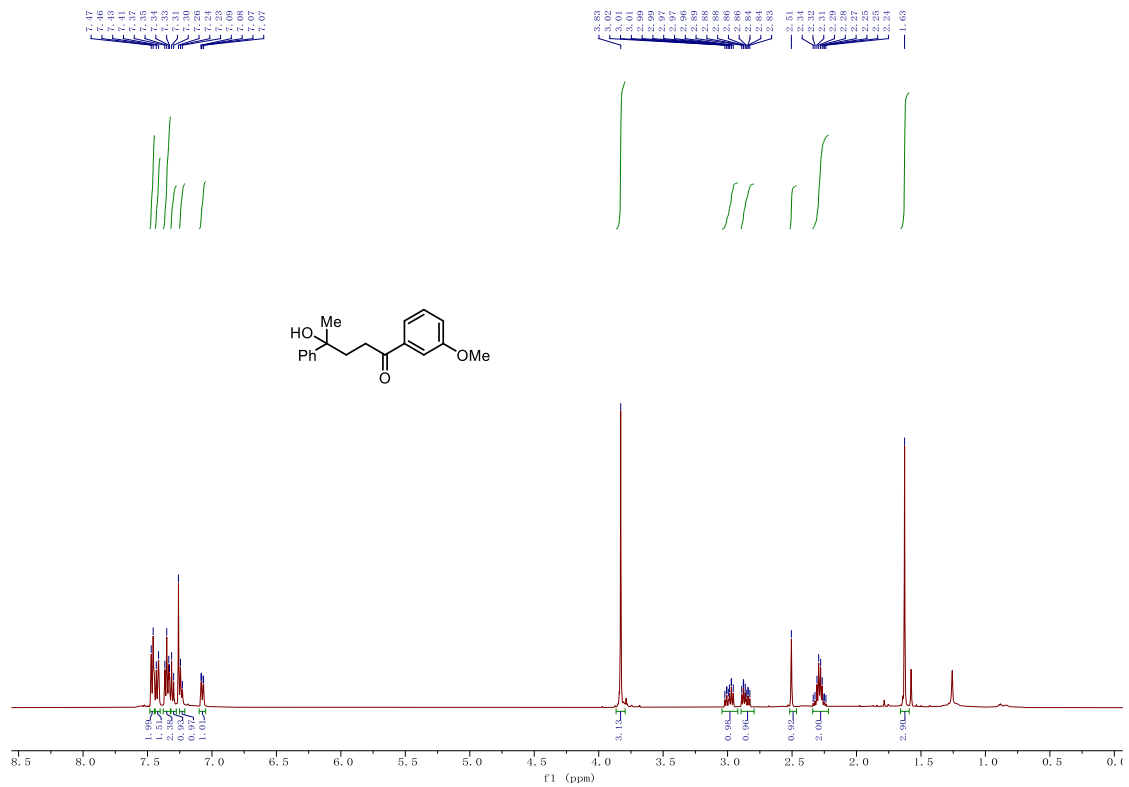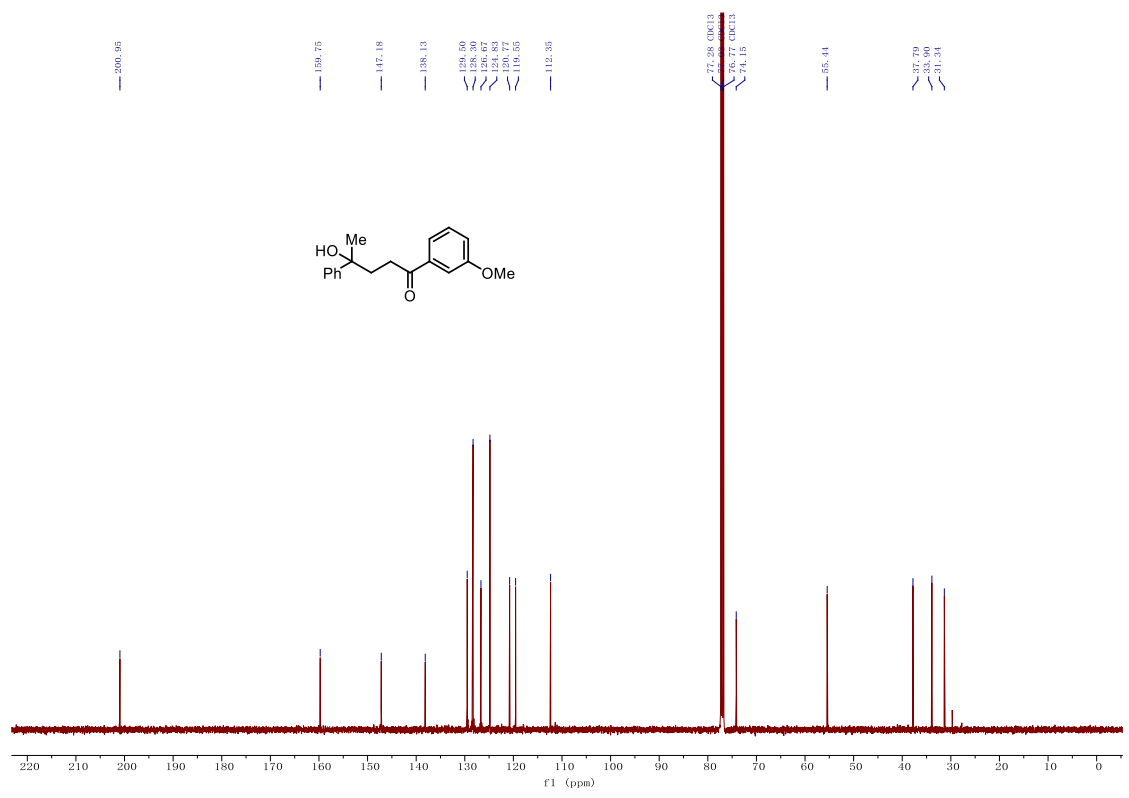

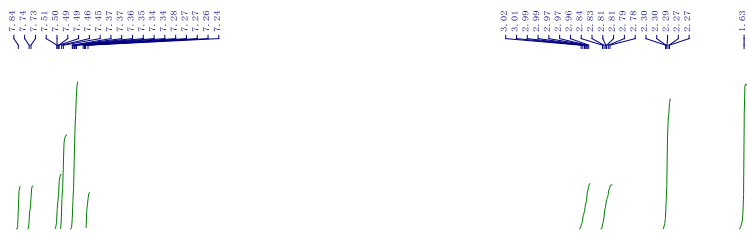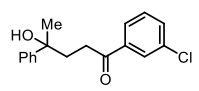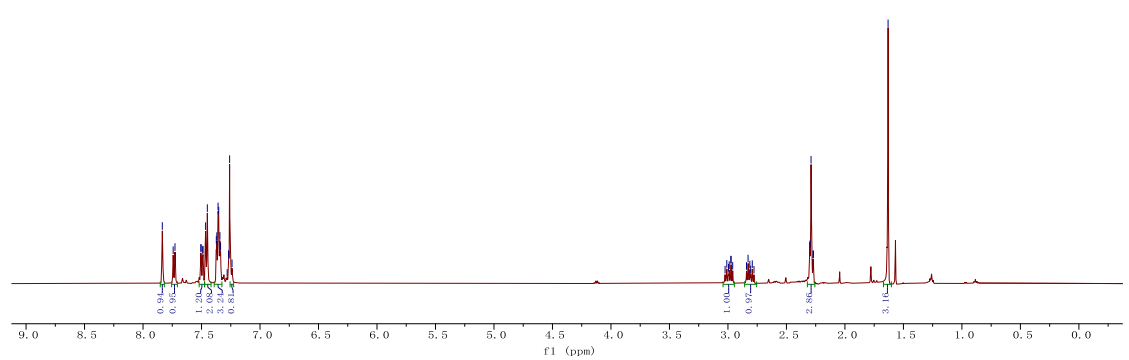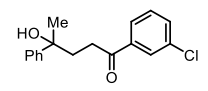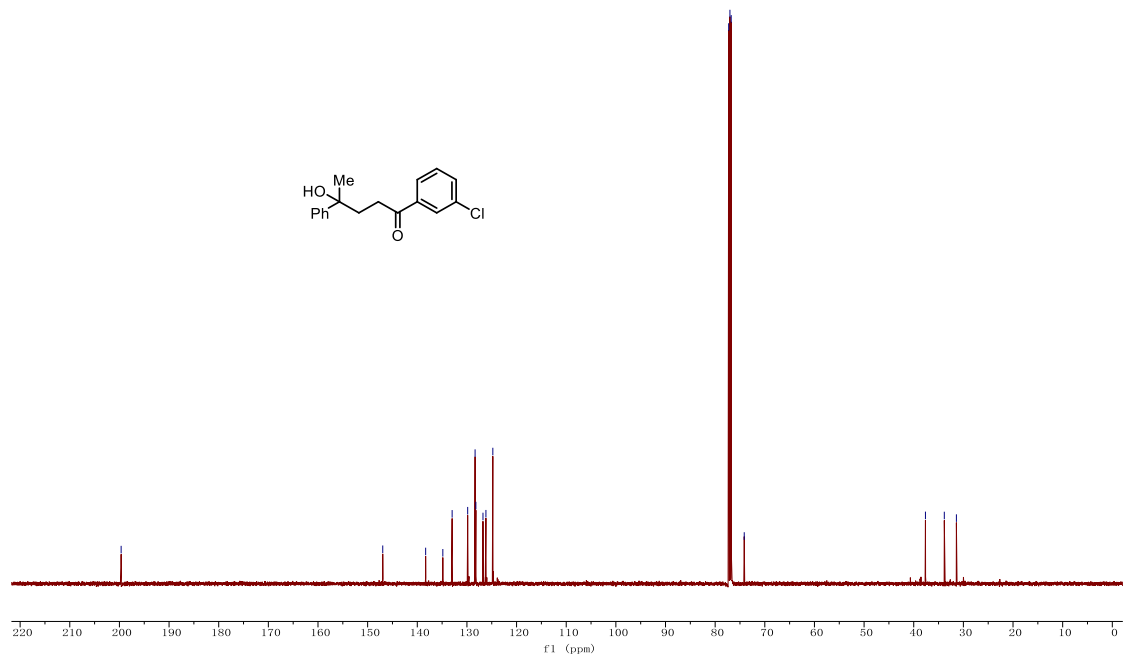

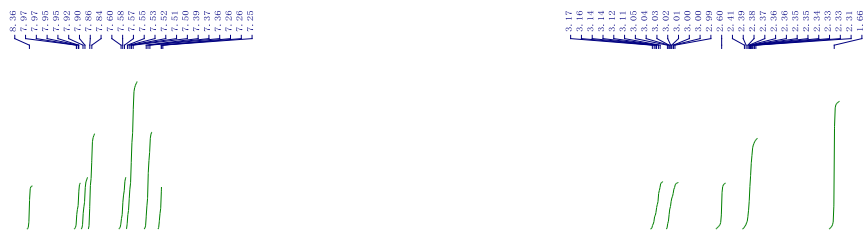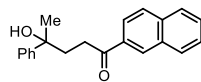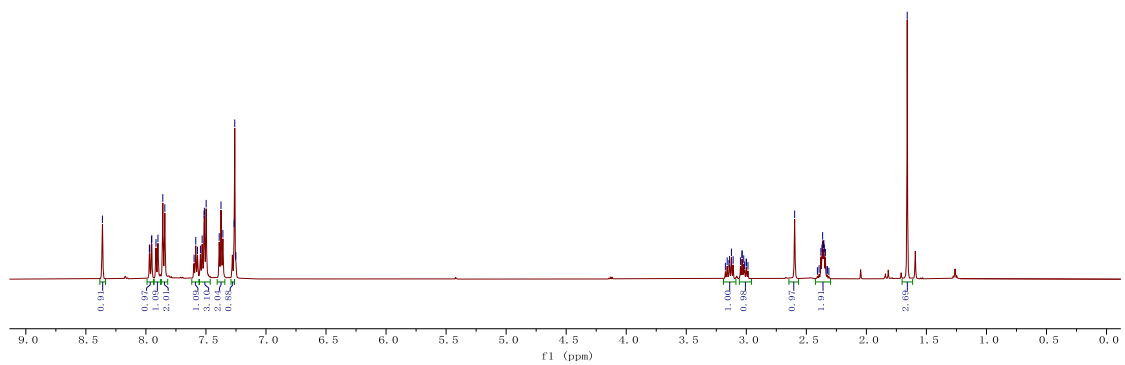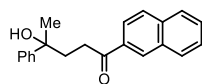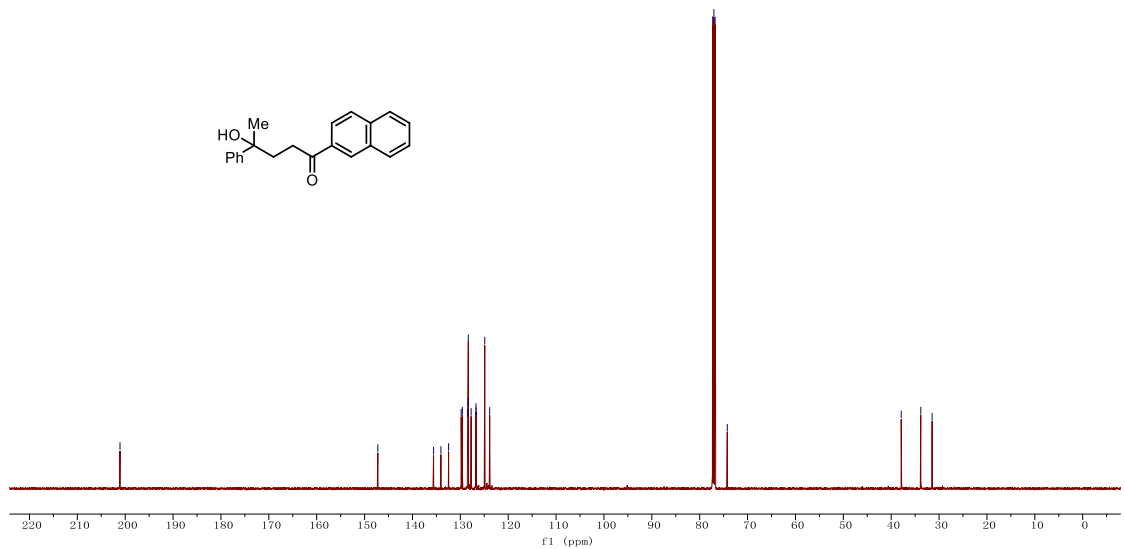

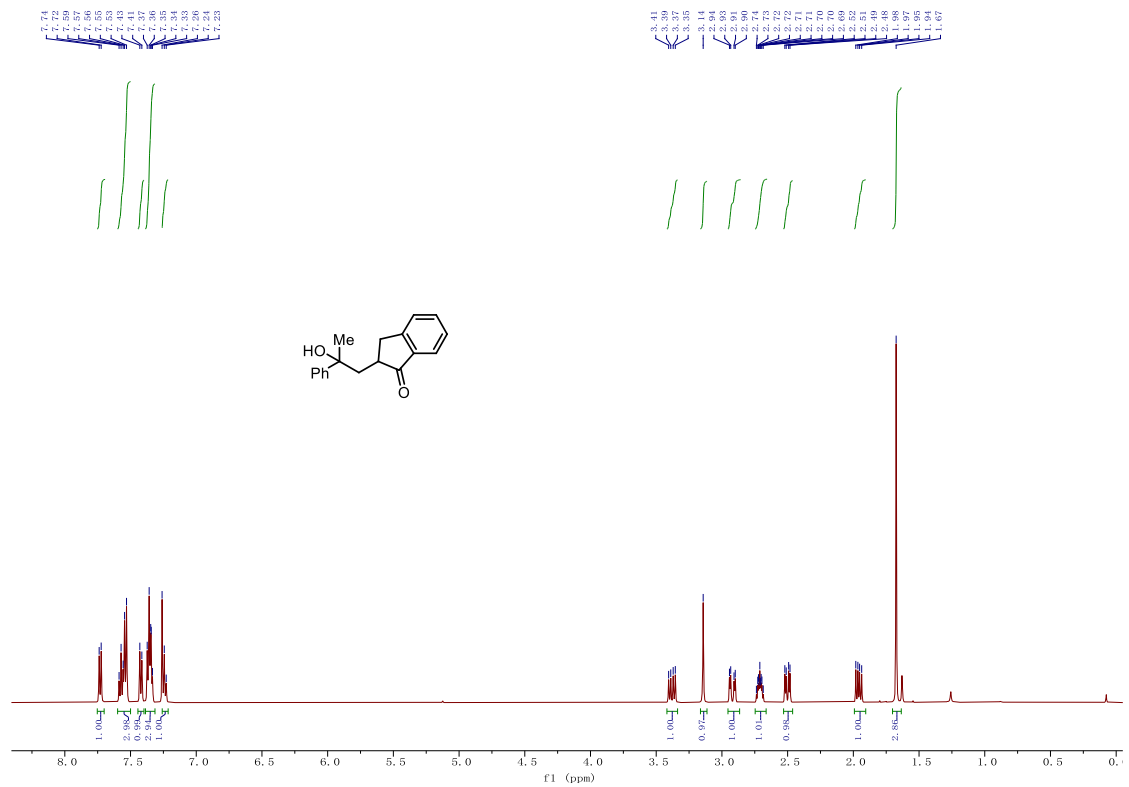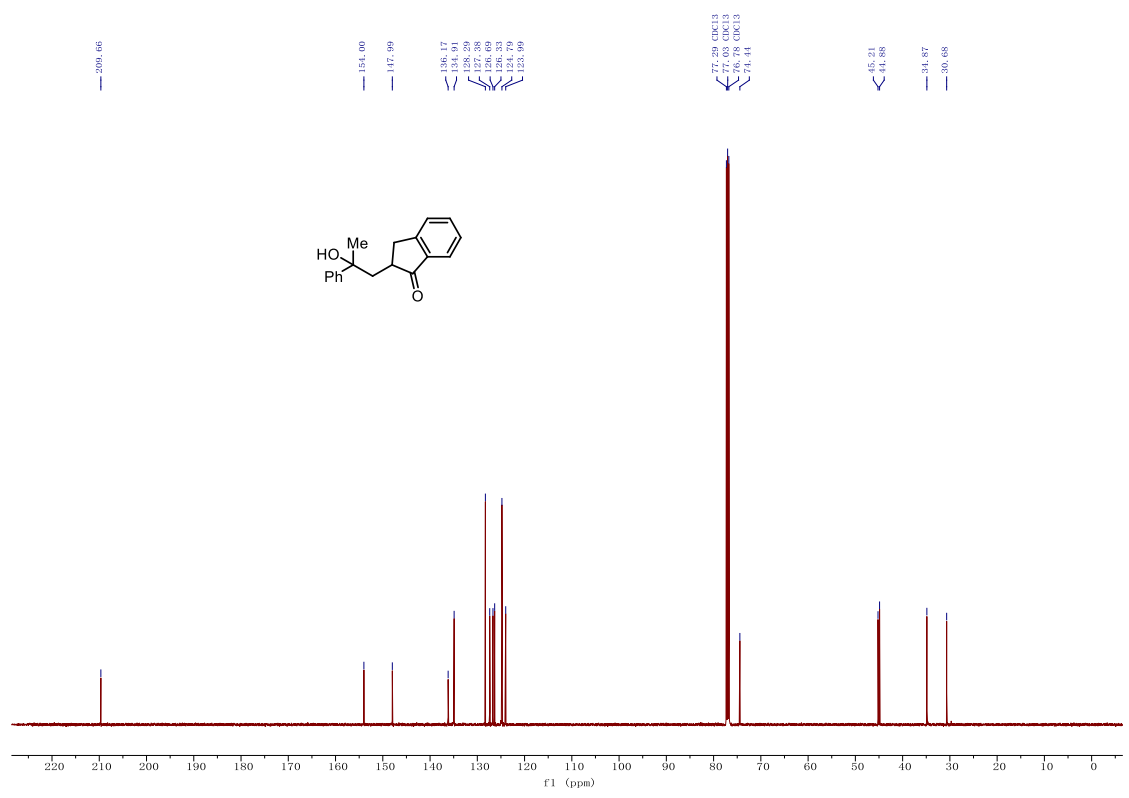

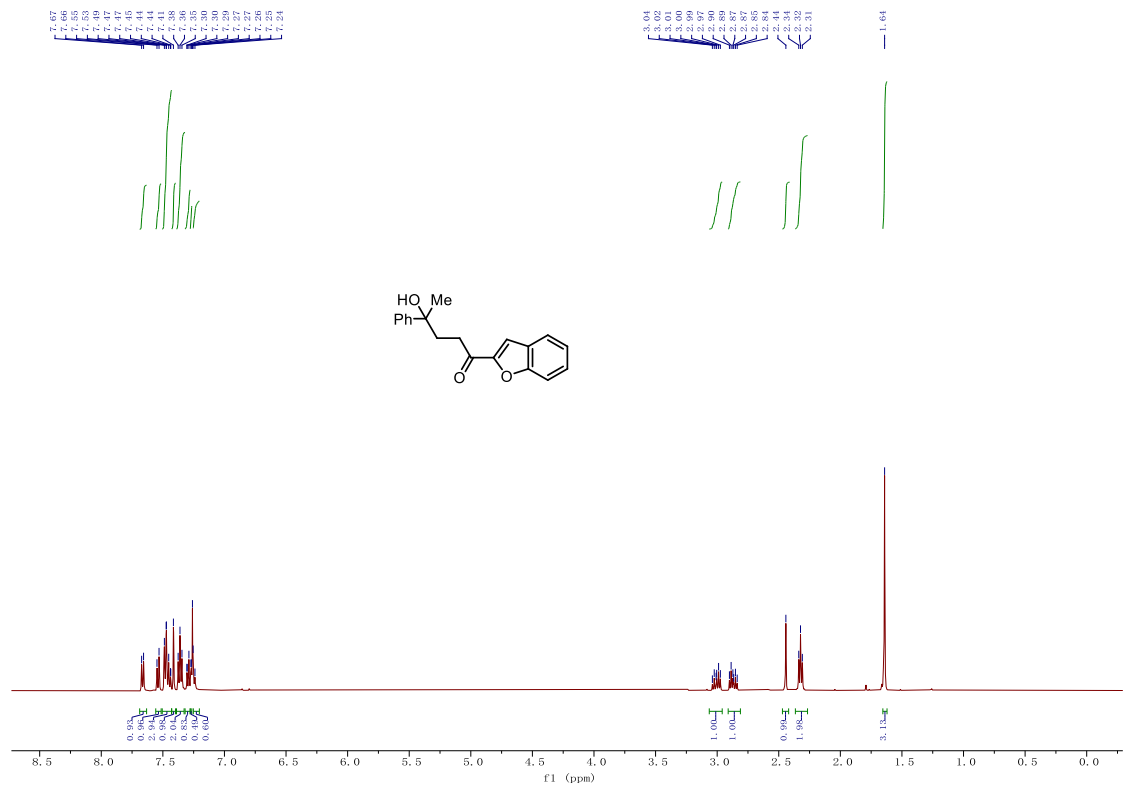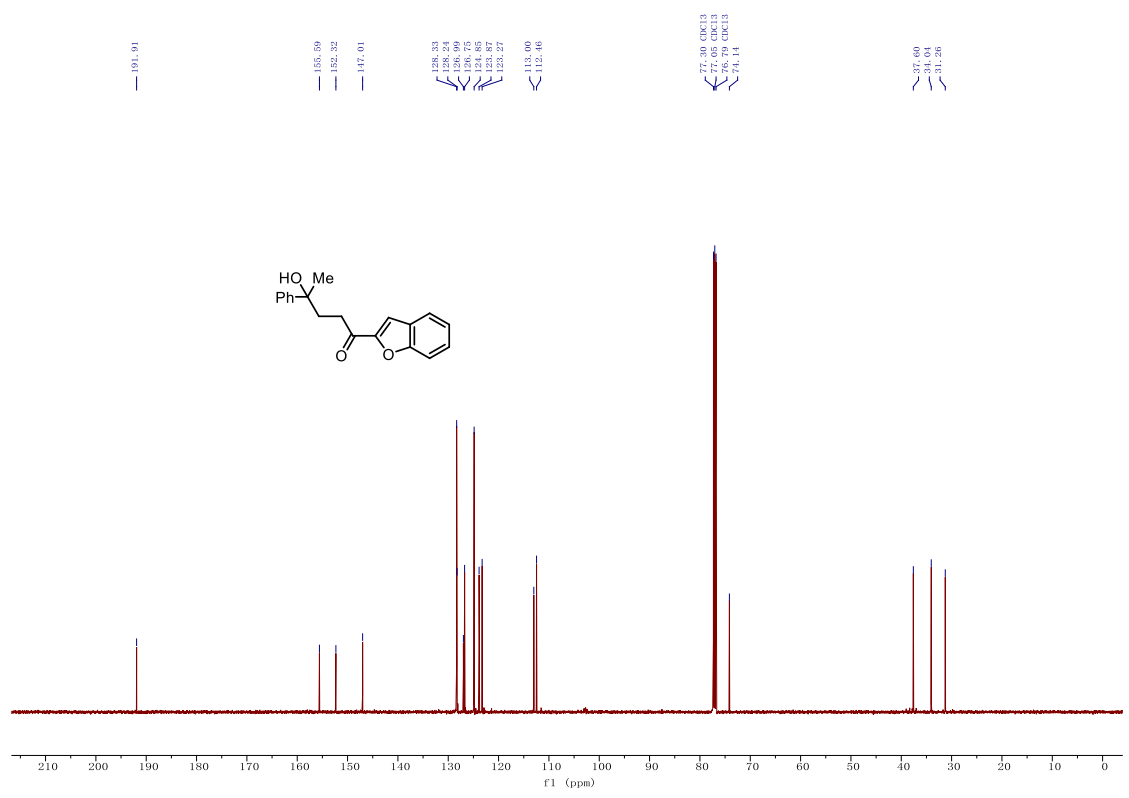

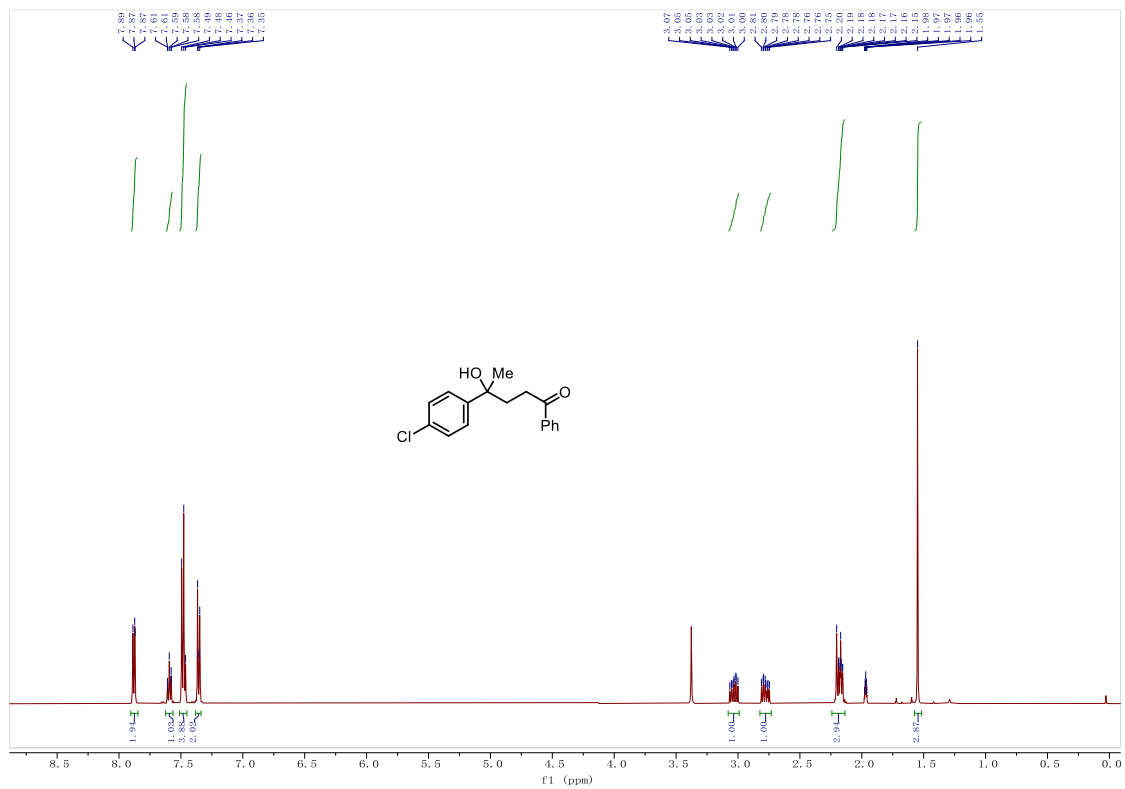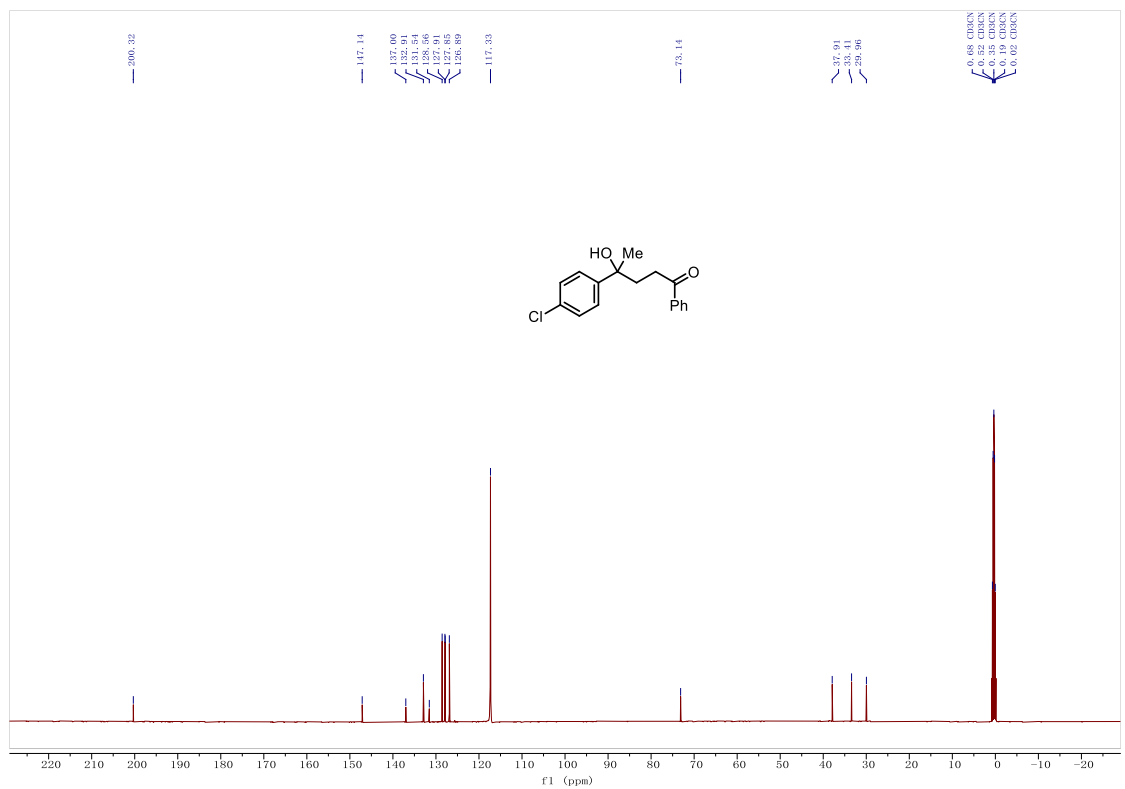



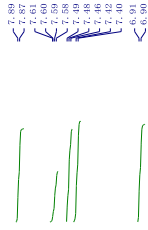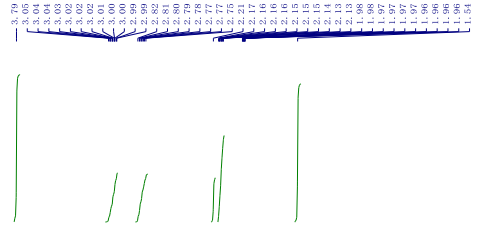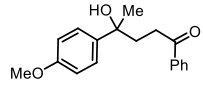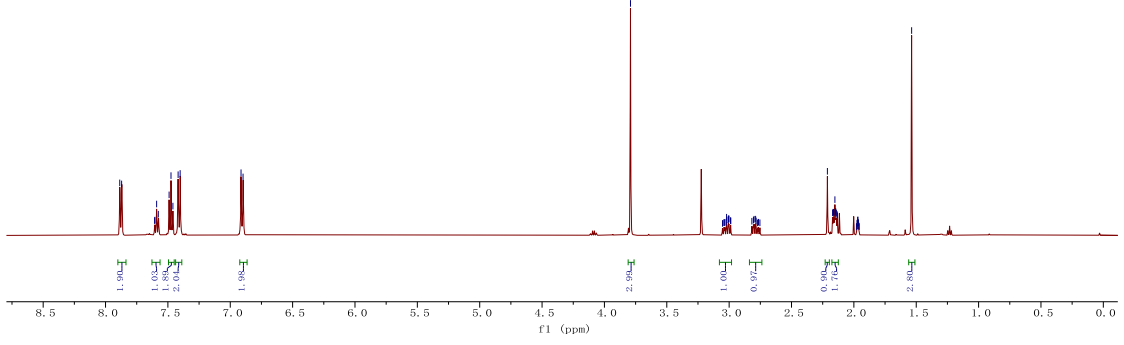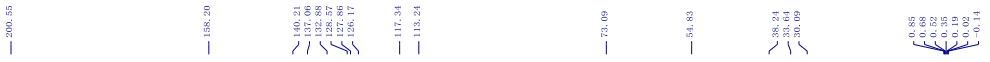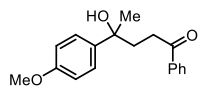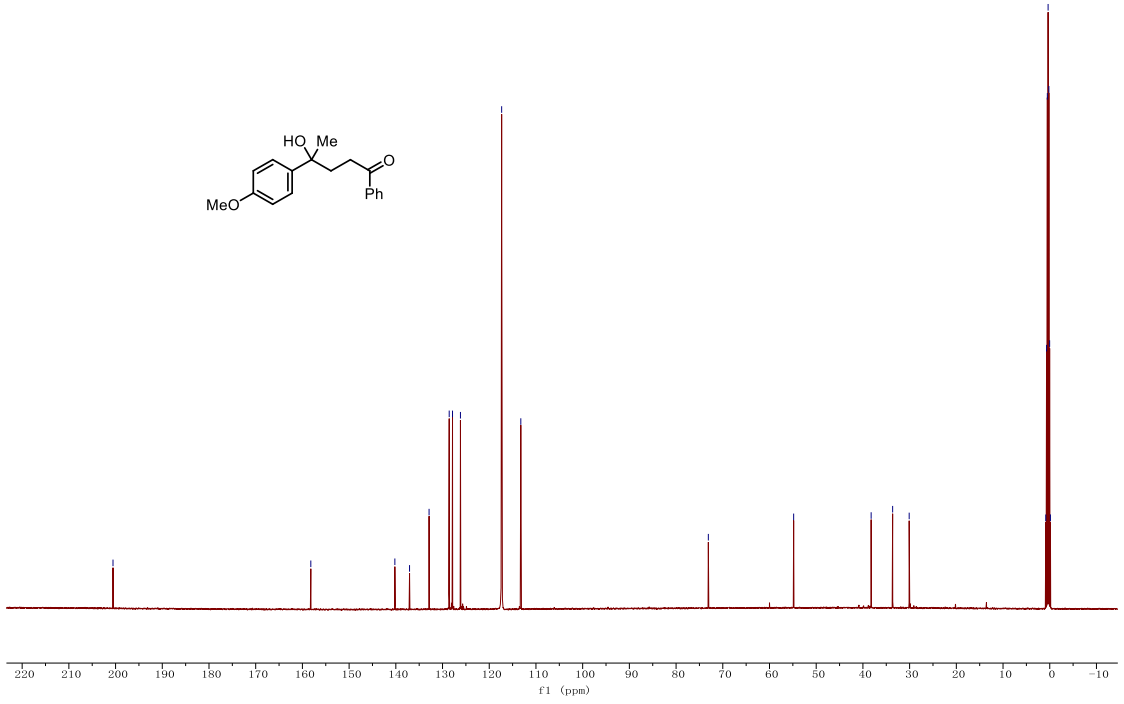

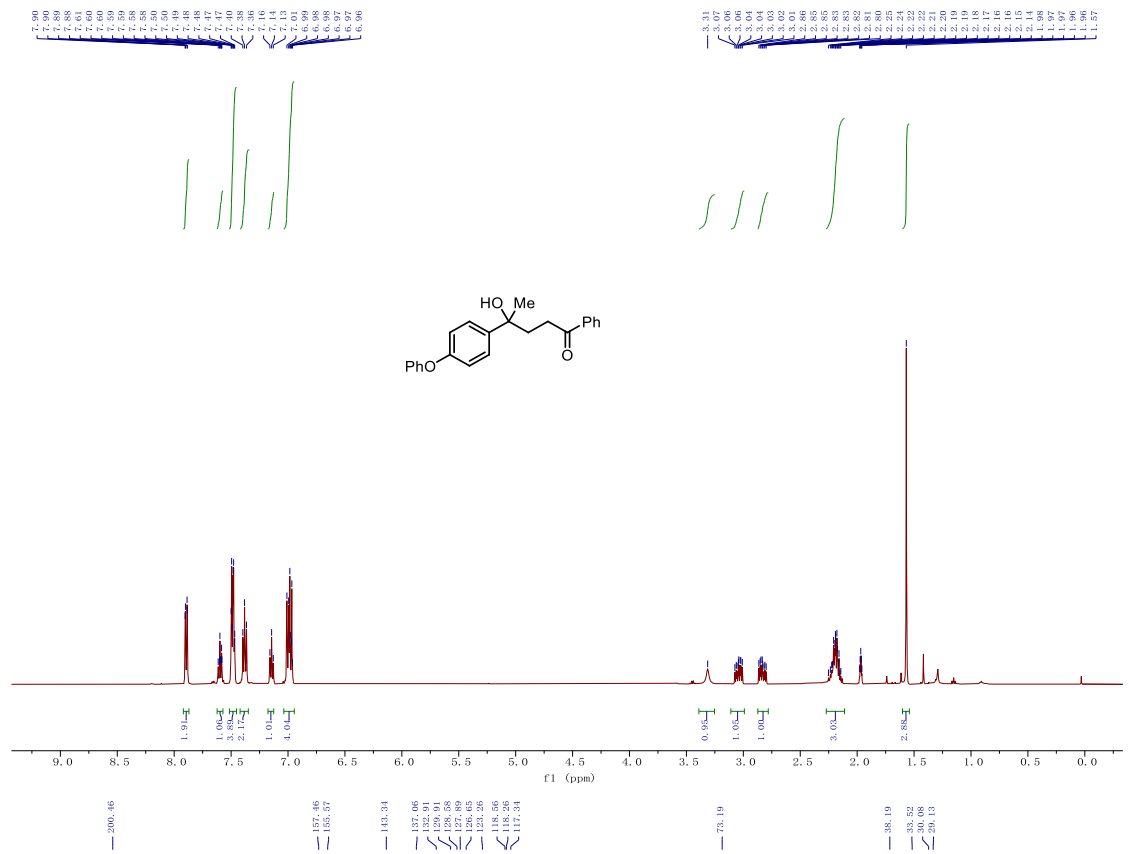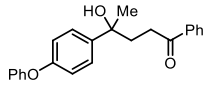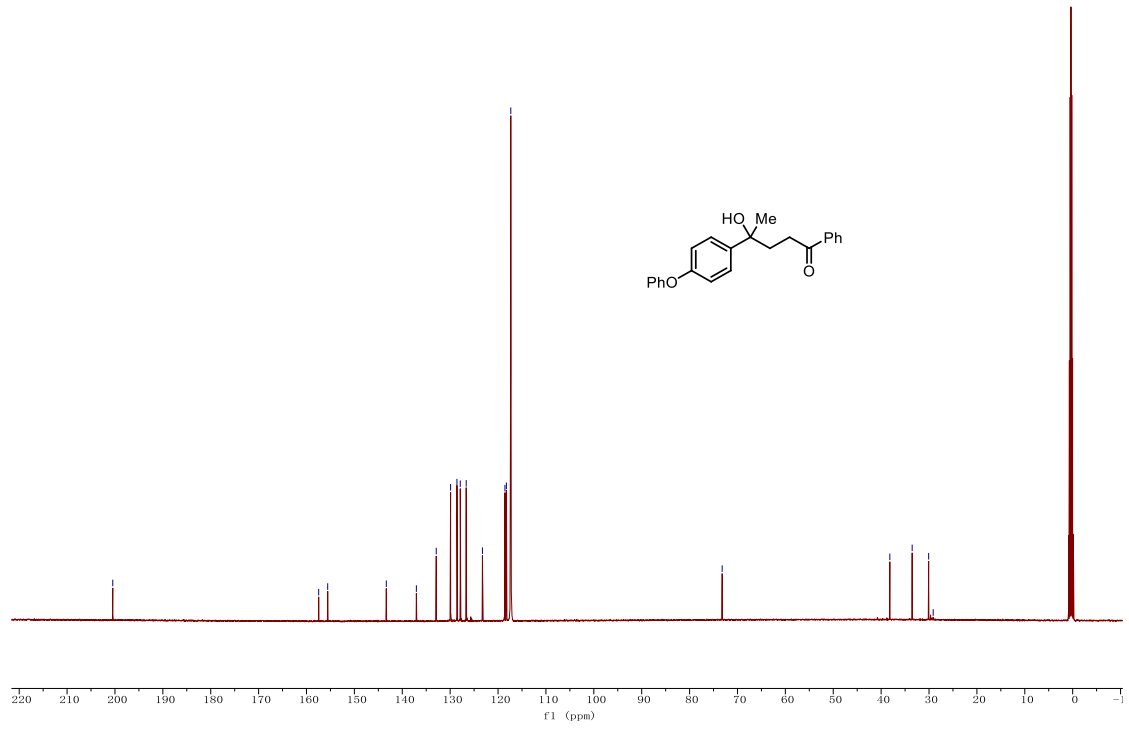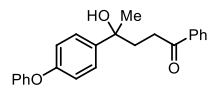

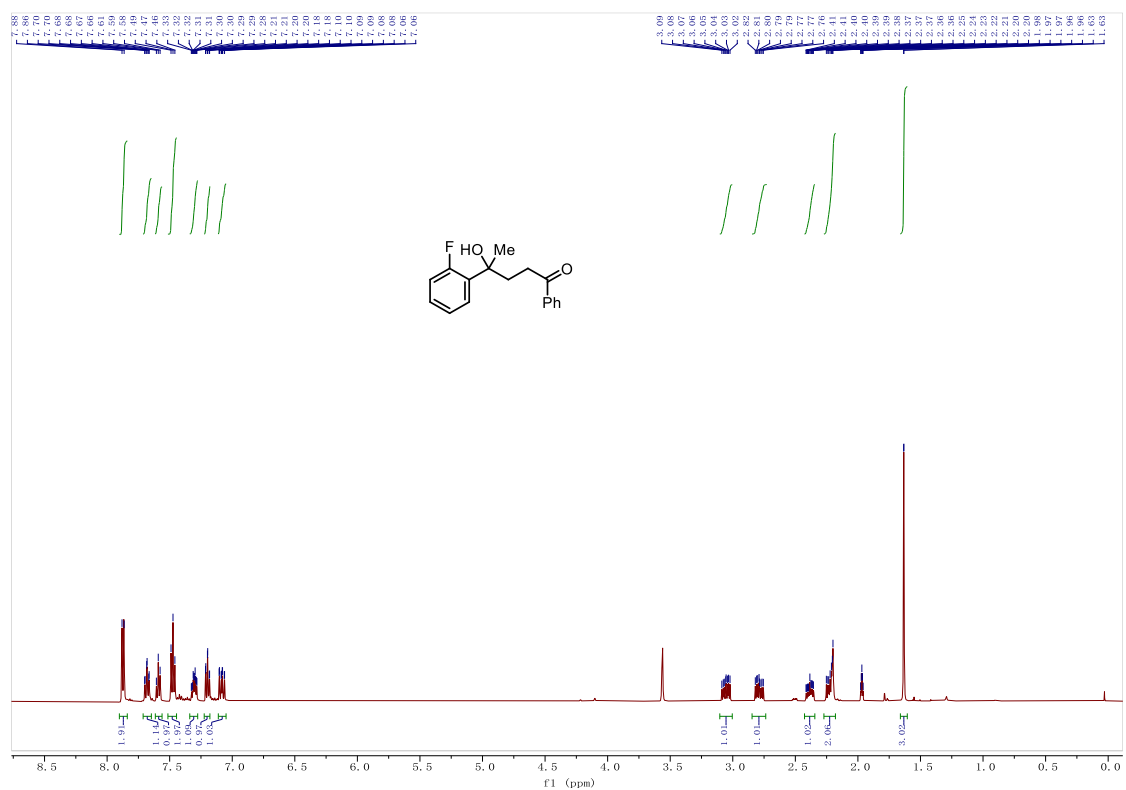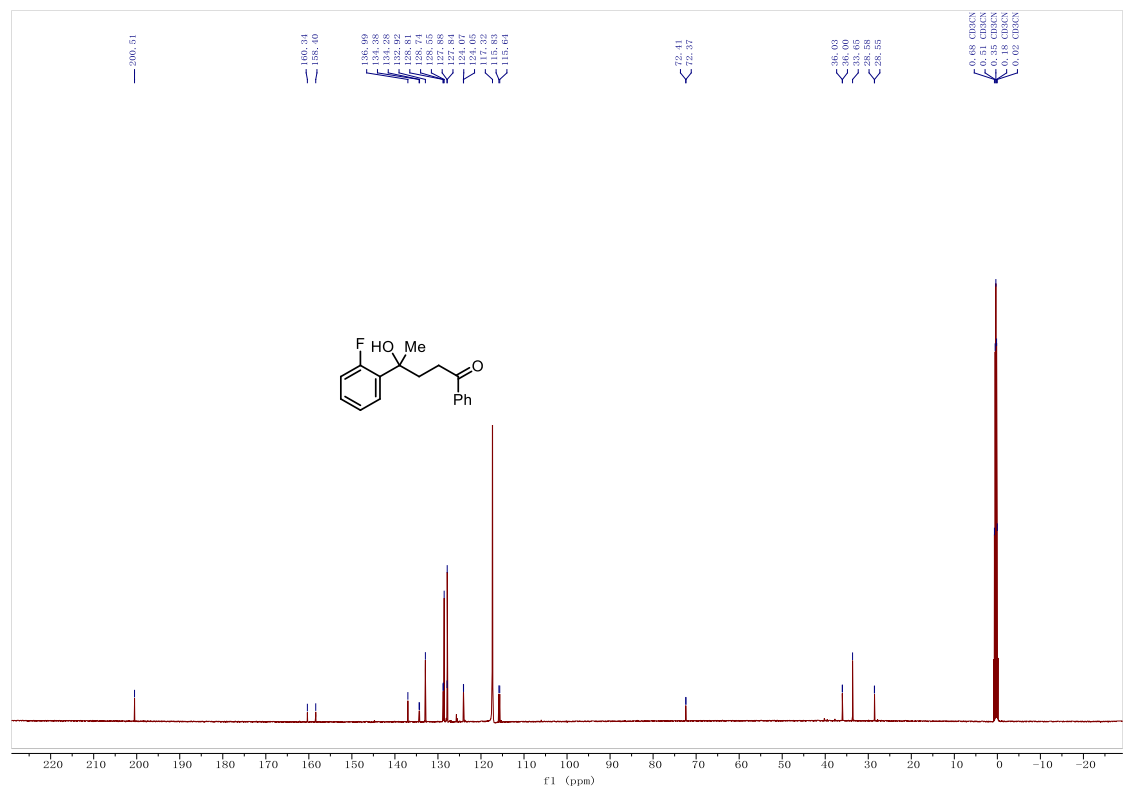

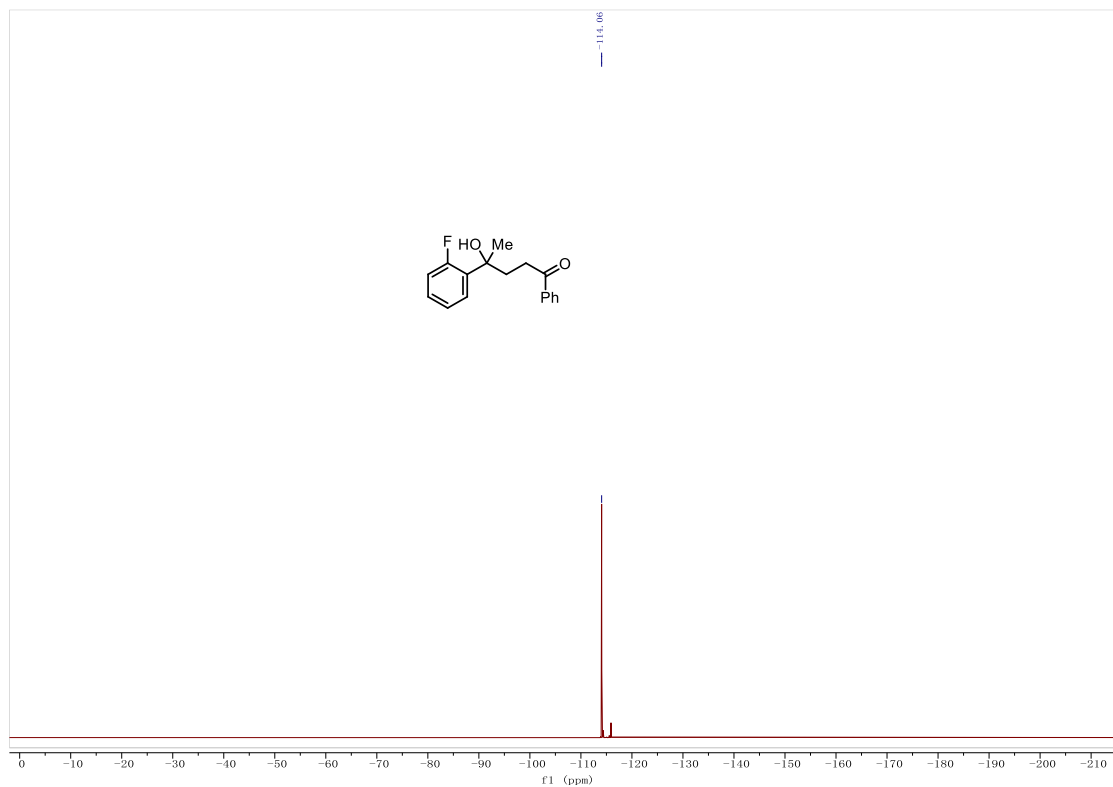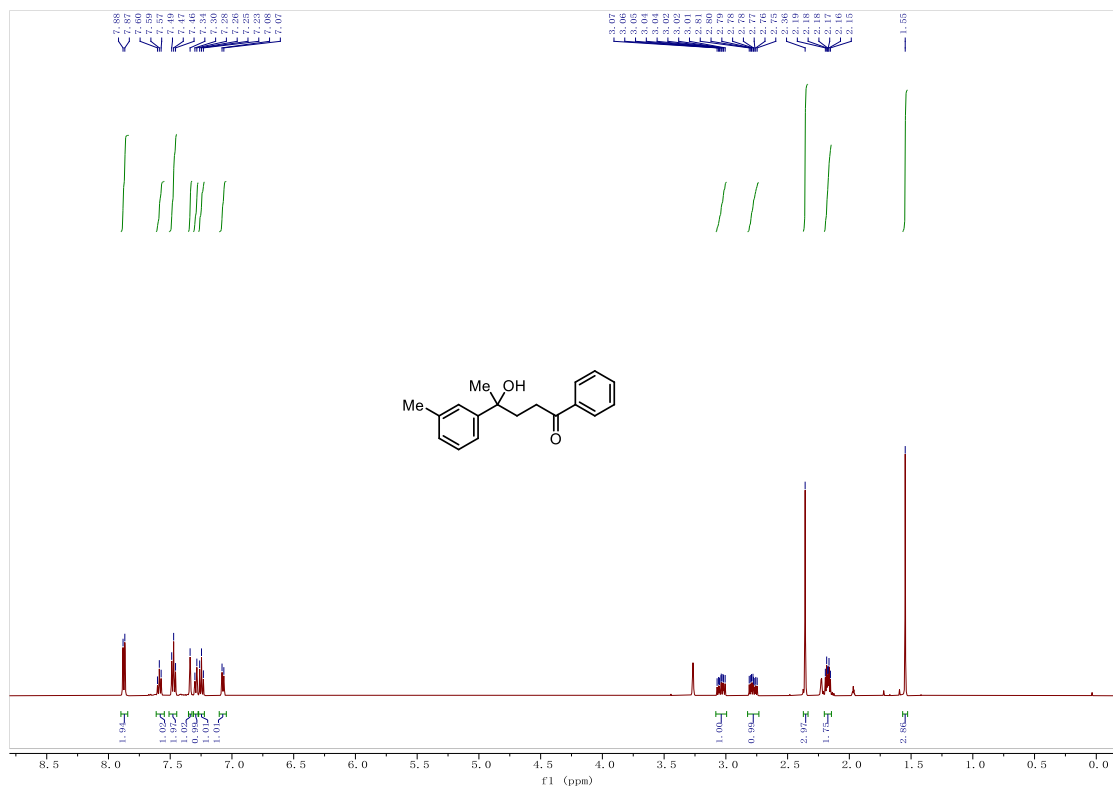

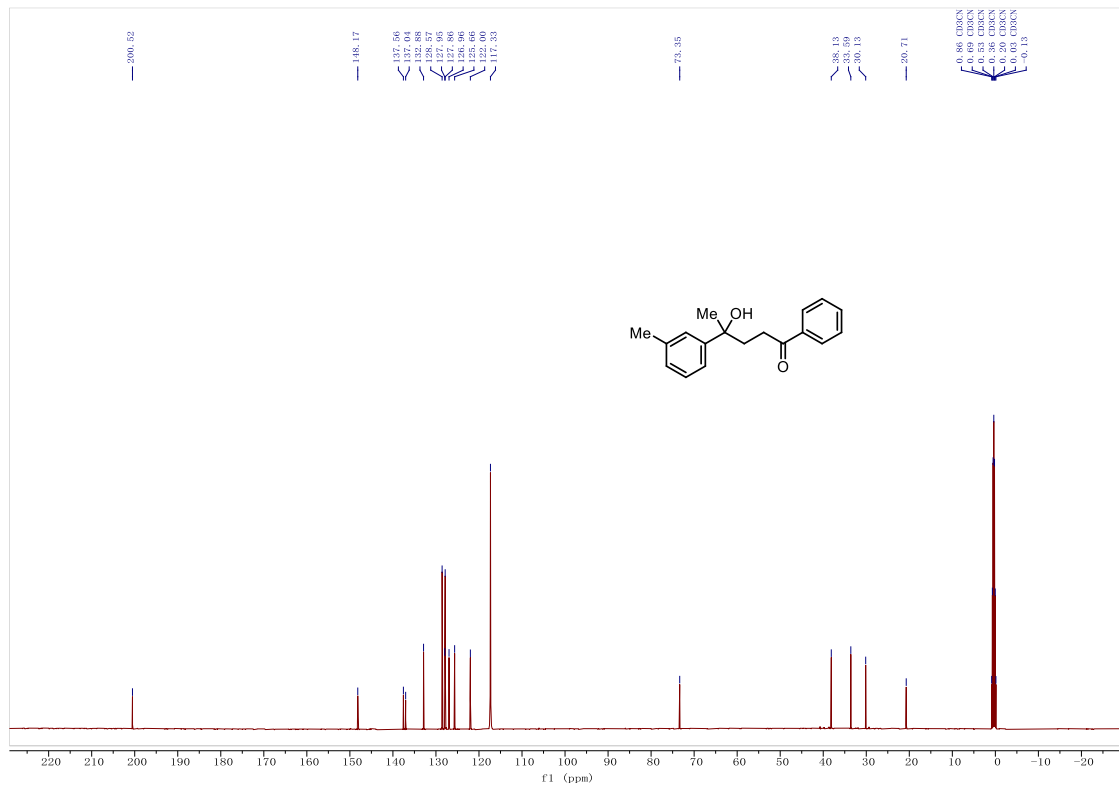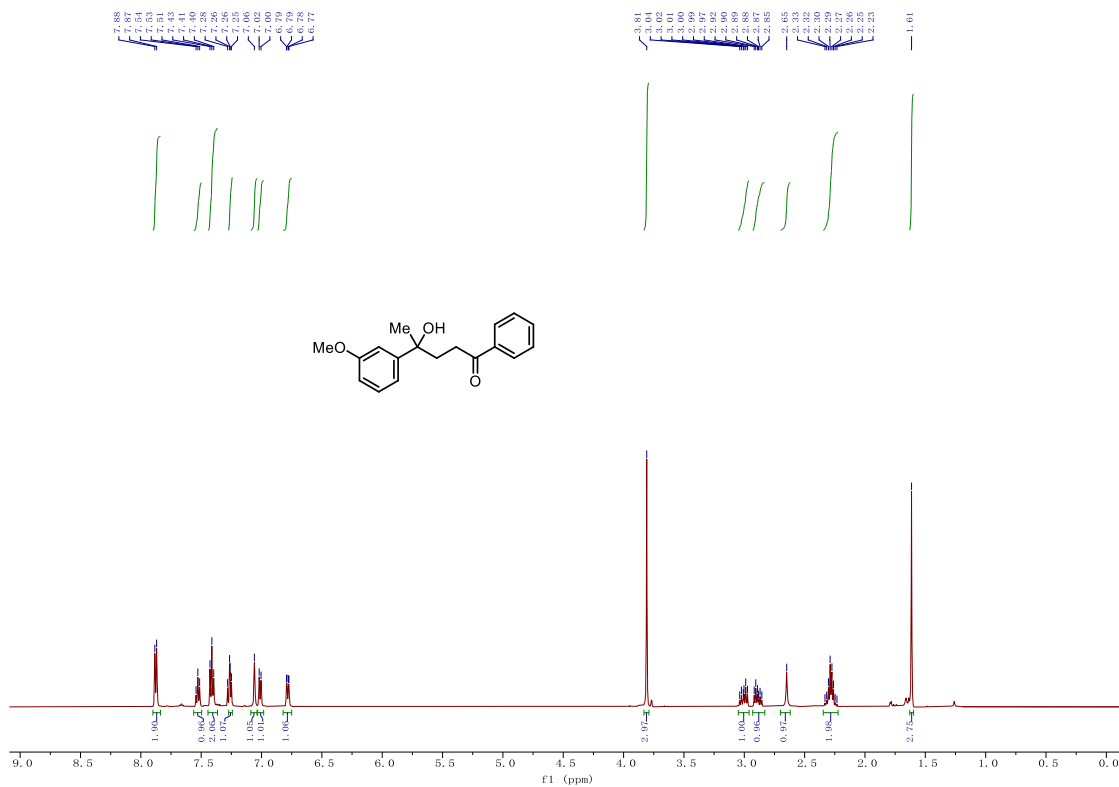

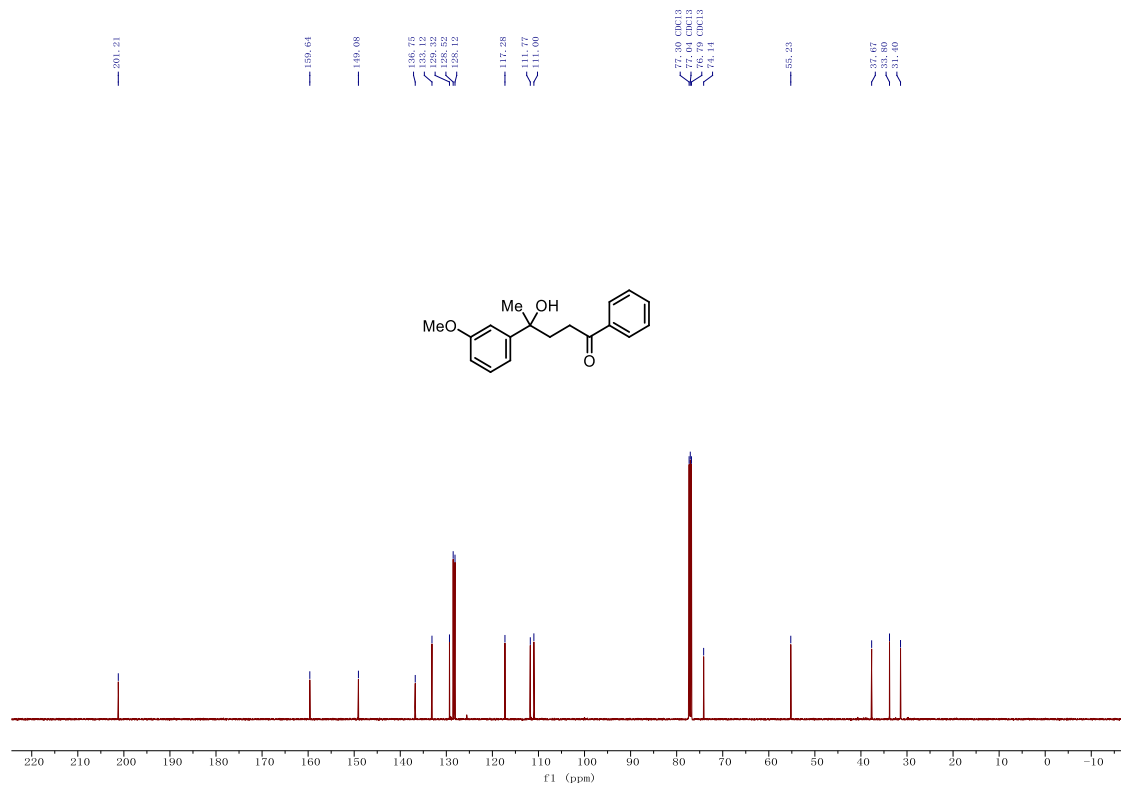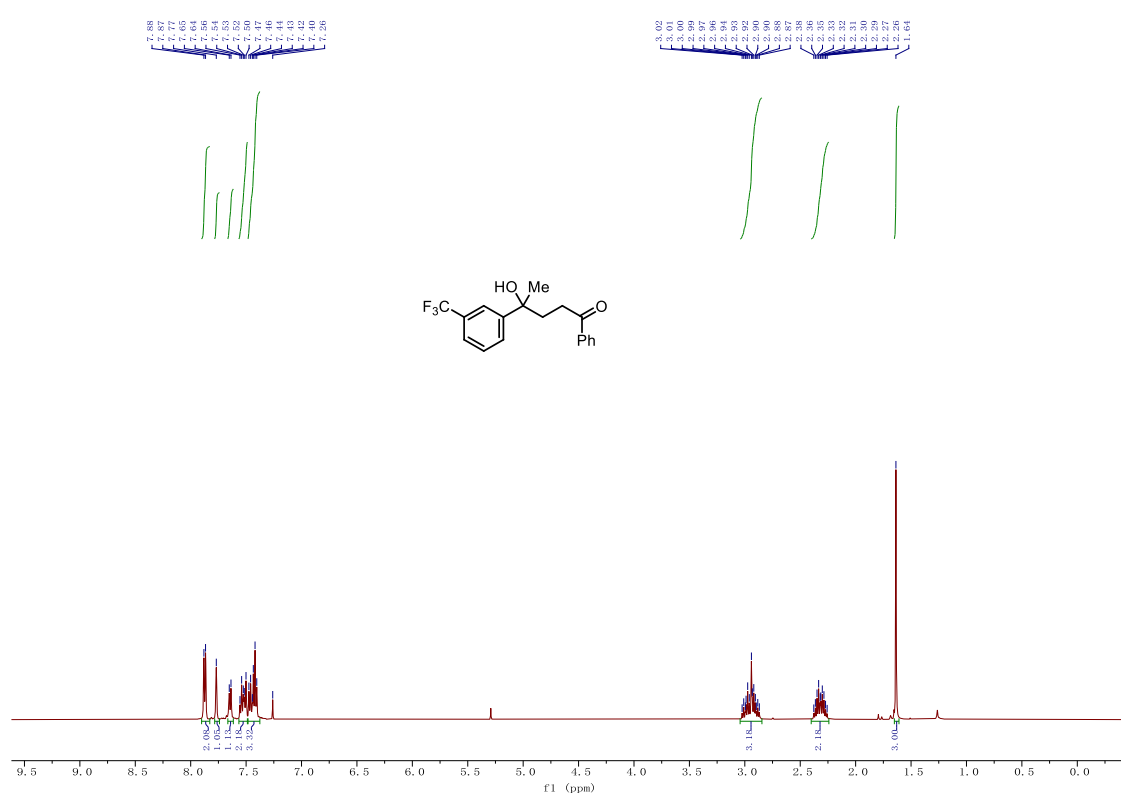

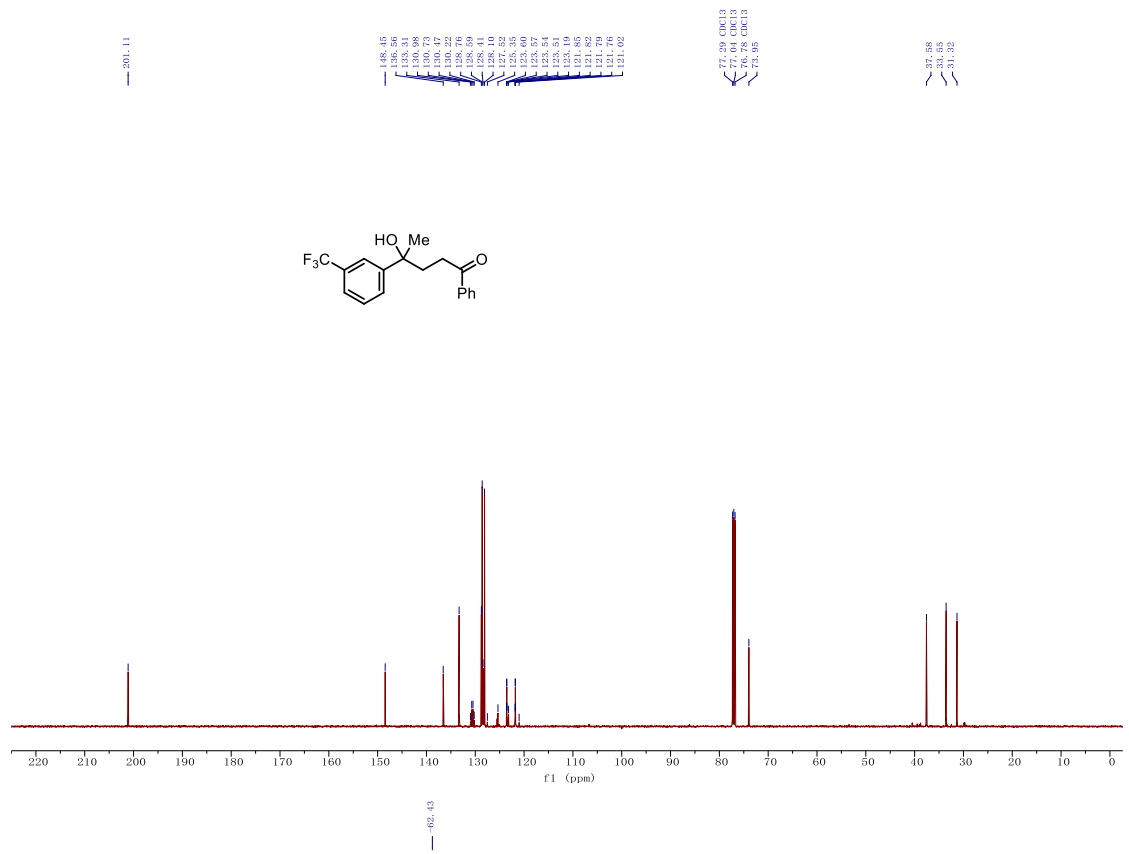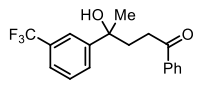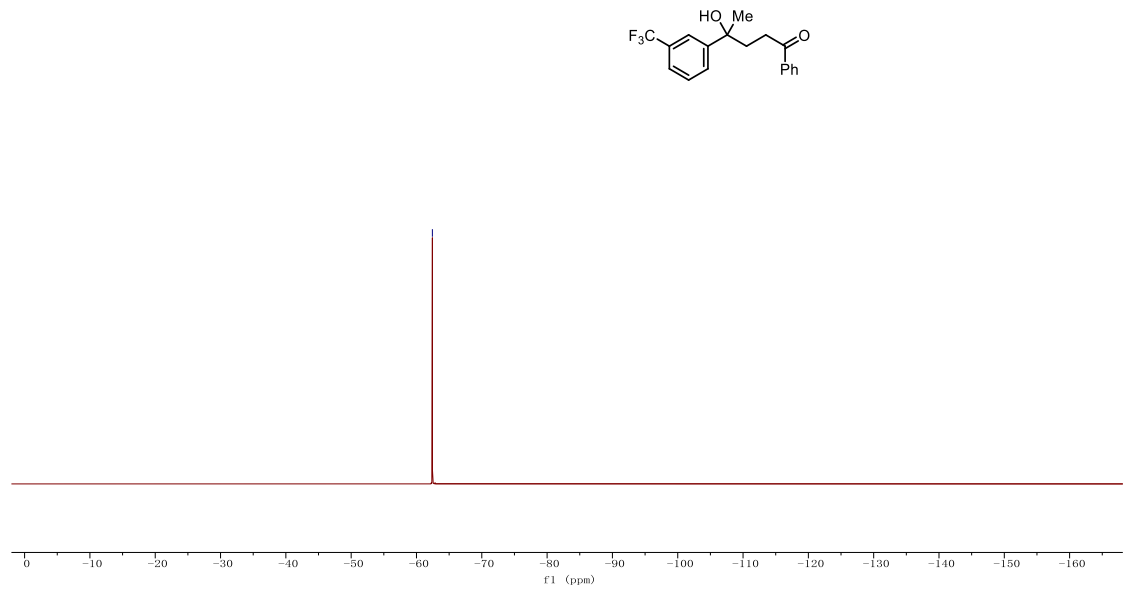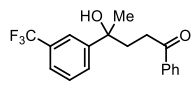

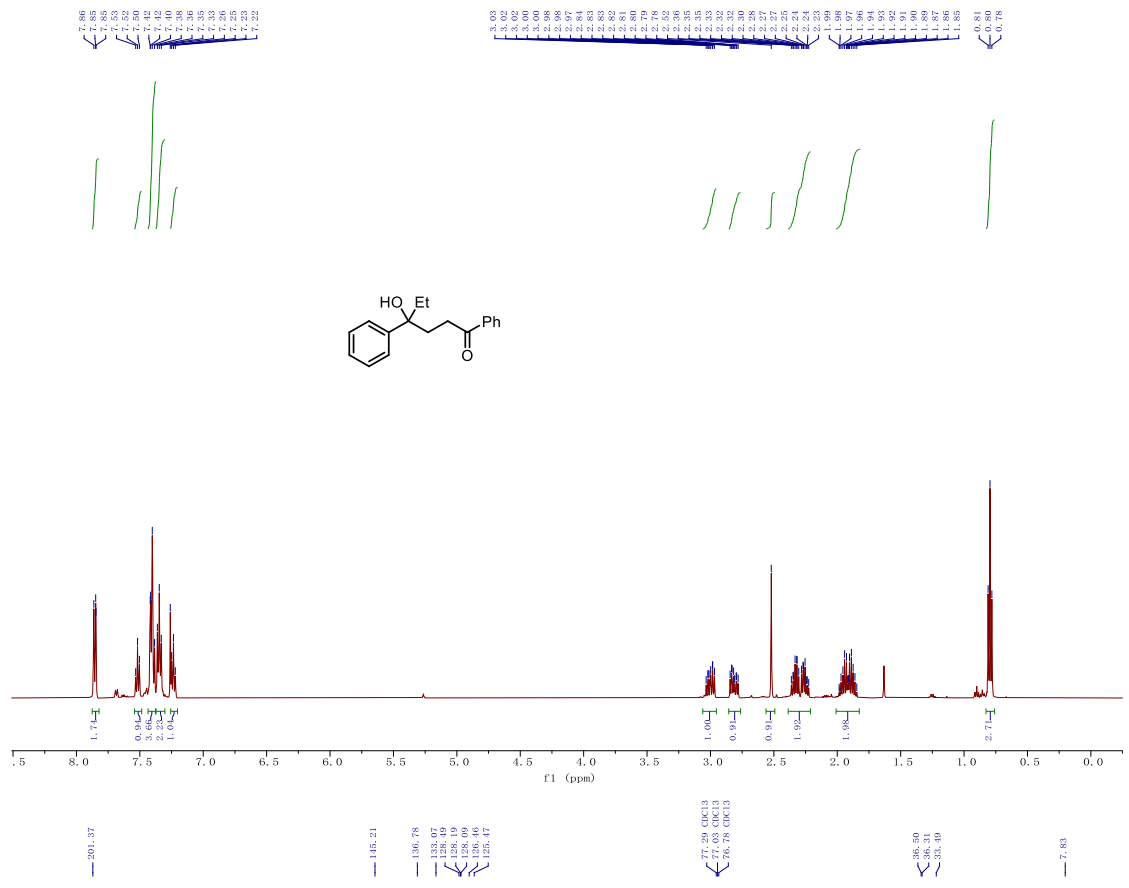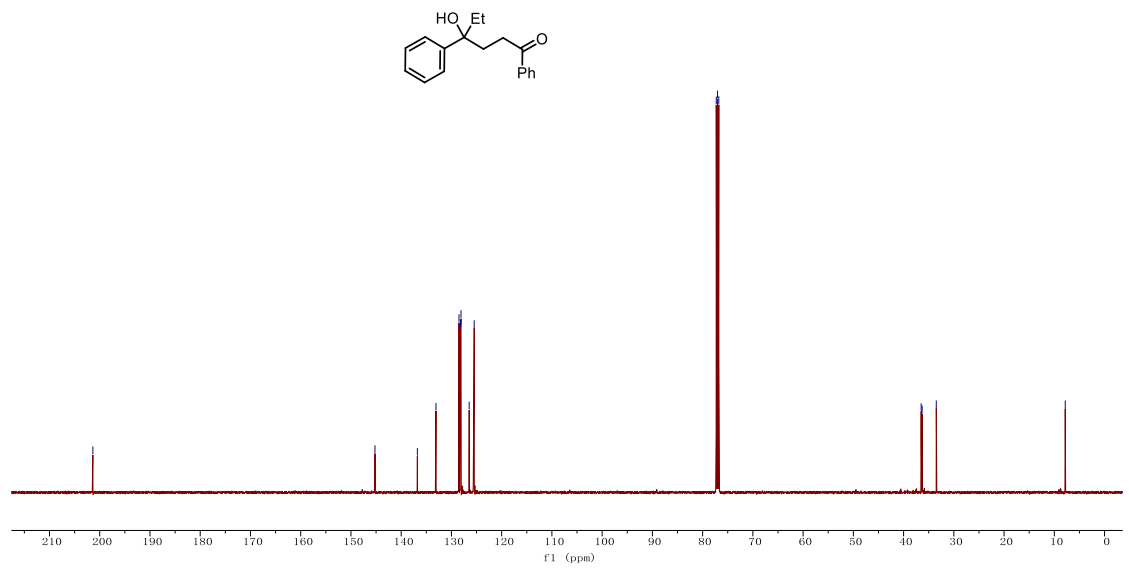



7.86  
7.60  
7.58  
7.48  
7.47  
7.38  
7.36  
7.35  
7.24  
7.23

3.95  
3.95  
3.94  
3.91  
3.91  
3.01  
2.71  
2.70  
2.69  
2.68  
2.67  
2.65  
2.25  
2.23  
2.22  
2.22  
2.19  
2.19  
2.17  
2.16  
1.93  
1.90  
1.89  
1.88  
1.84  
1.83  
1.80  
1.80  
1.73  
1.72  
1.40  
1.38  
1.38  
1.35  
1.35  
1.33  
1.33  
1.31  
1.30  
1.07  
1.05  
1.03  
1.02  
1.01  
0.99  
0.99  
0.96  
0.94  
0.86  
0.83

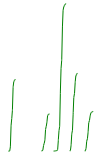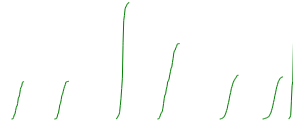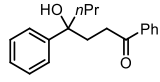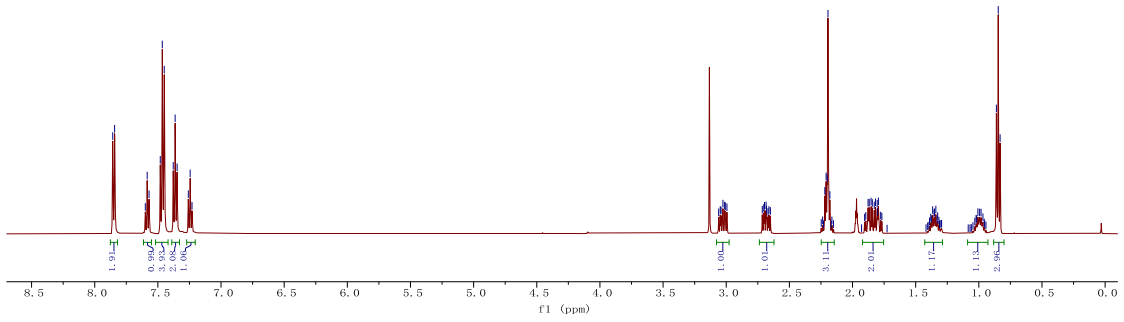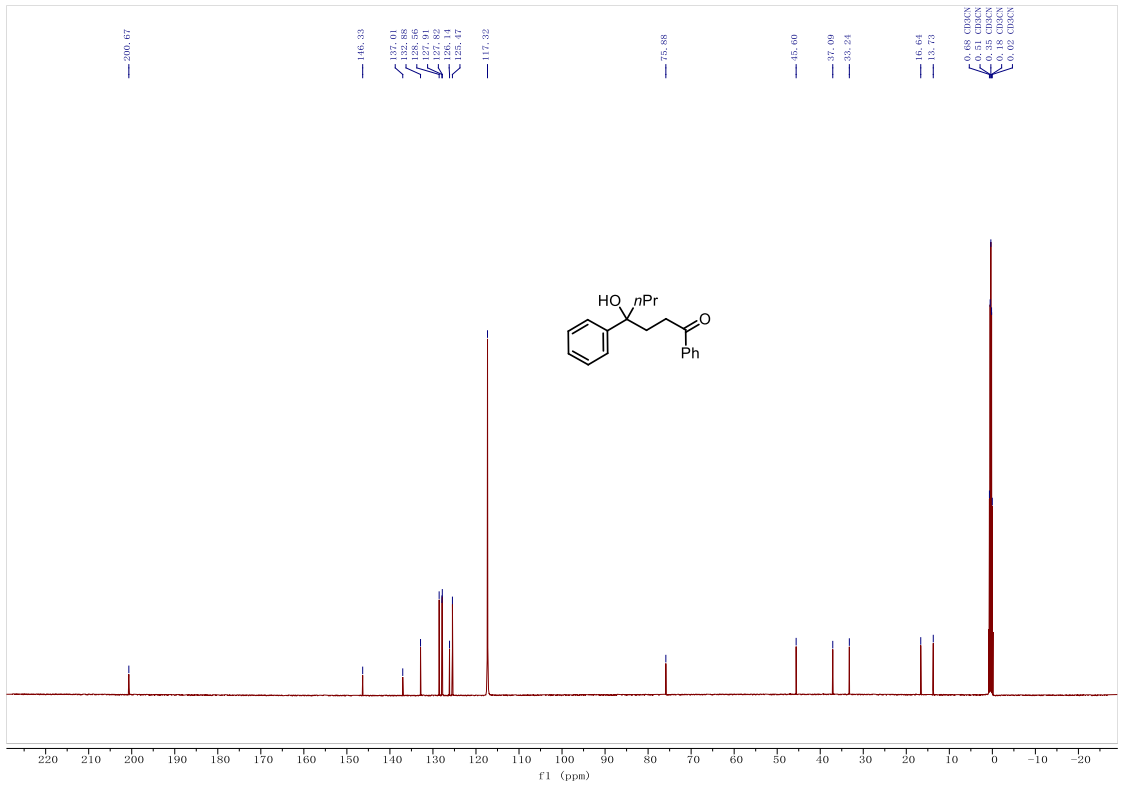

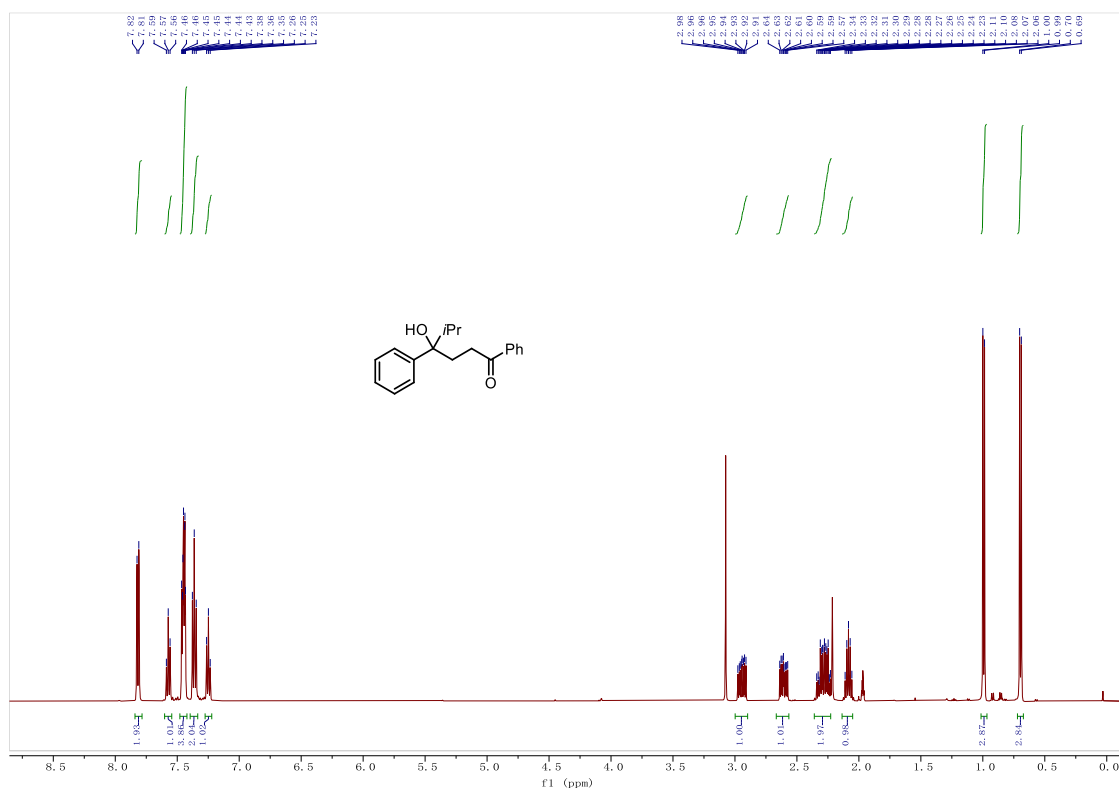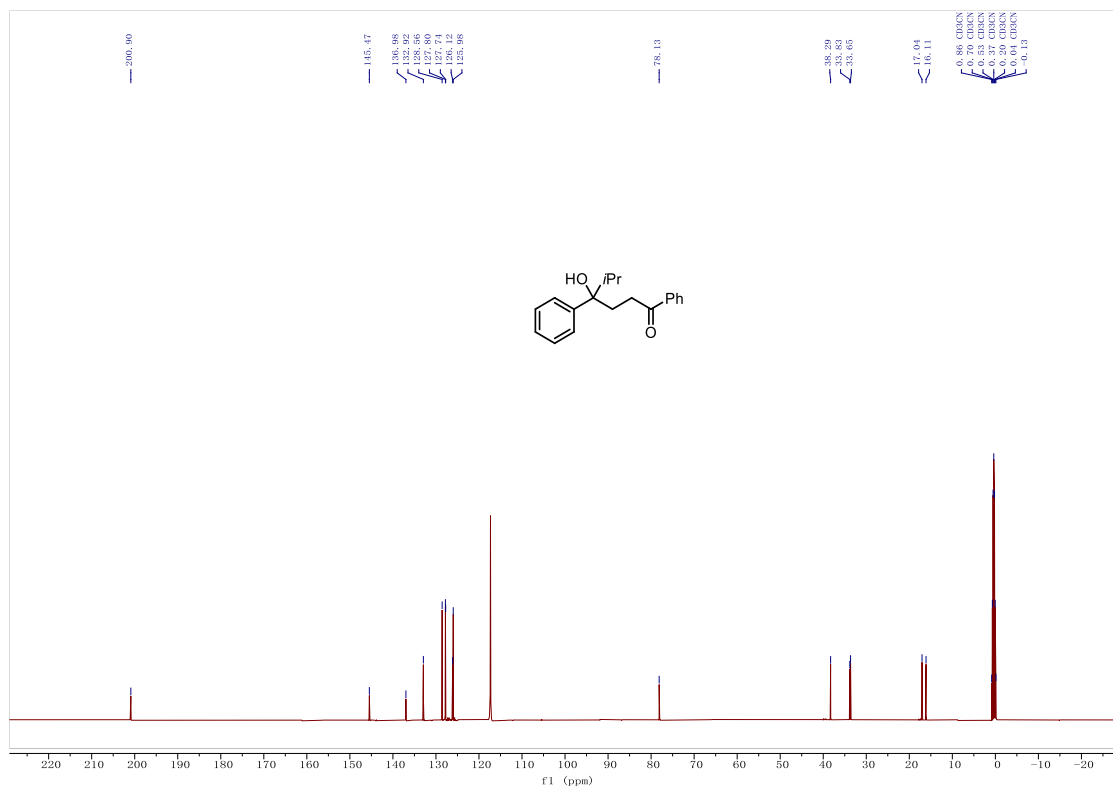

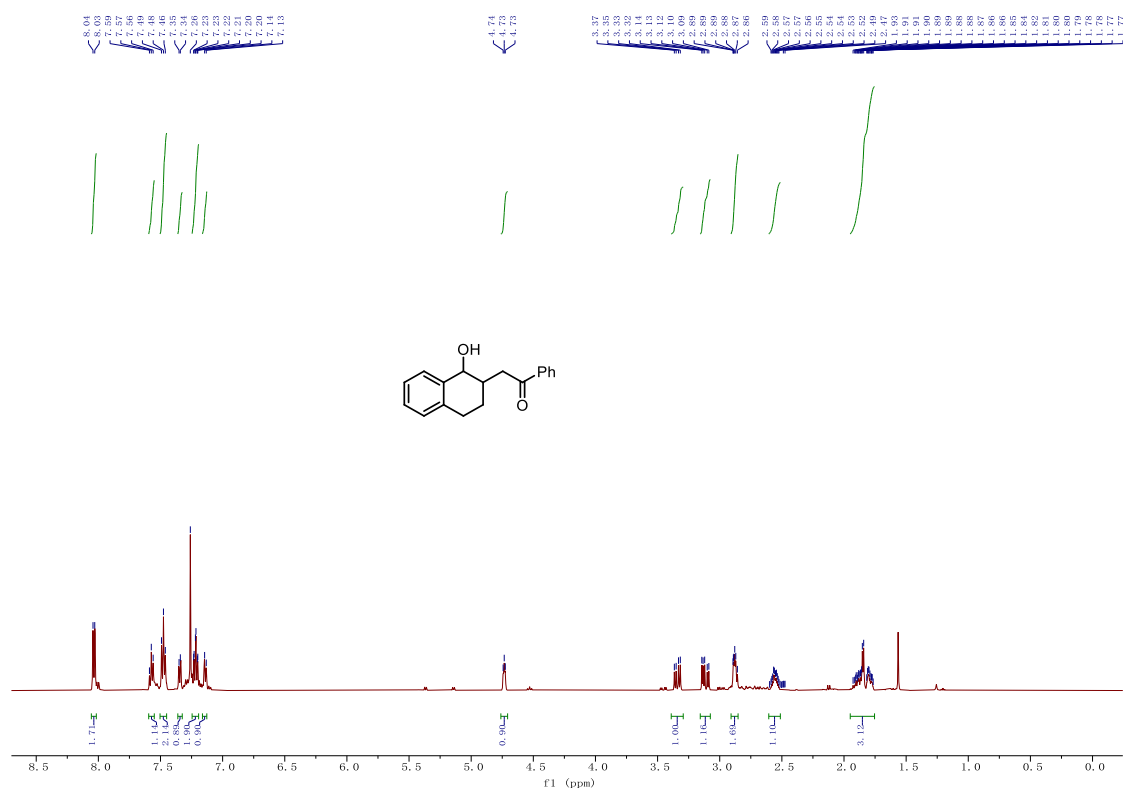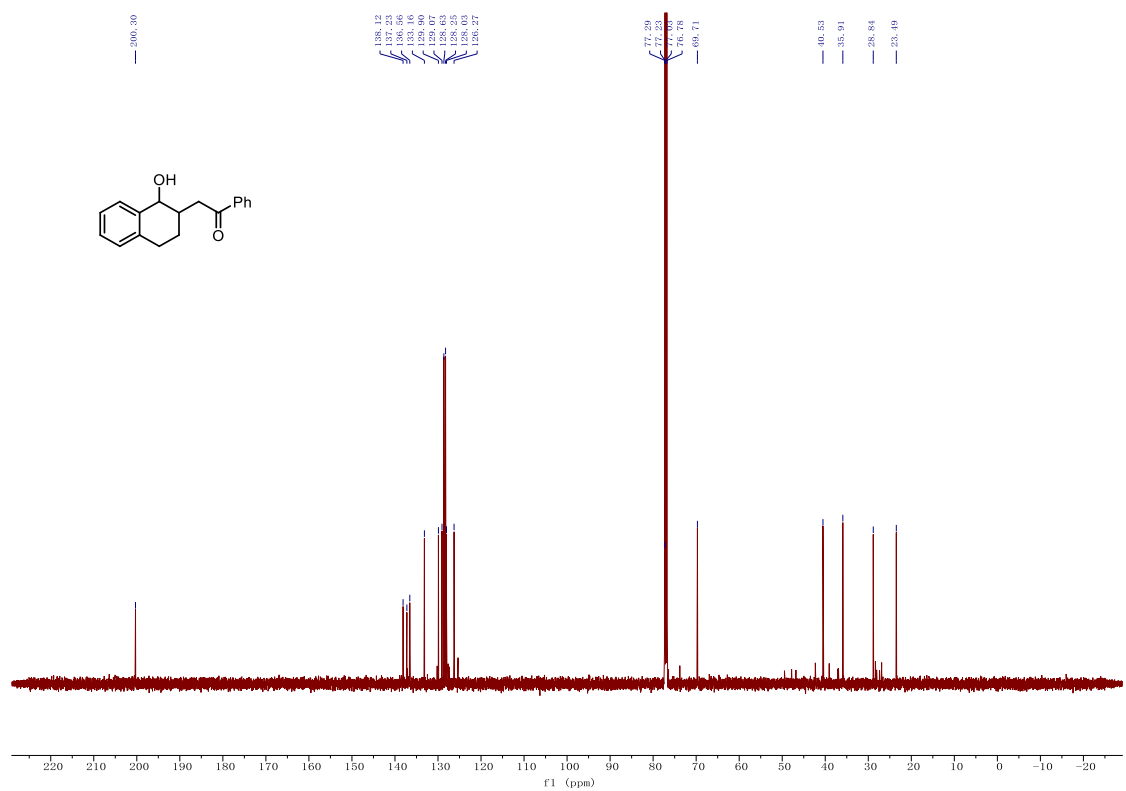

### Peak assignment of rac-29

The dr of rac-29 is 7:1 (*cis/trans*) based on the NMR.

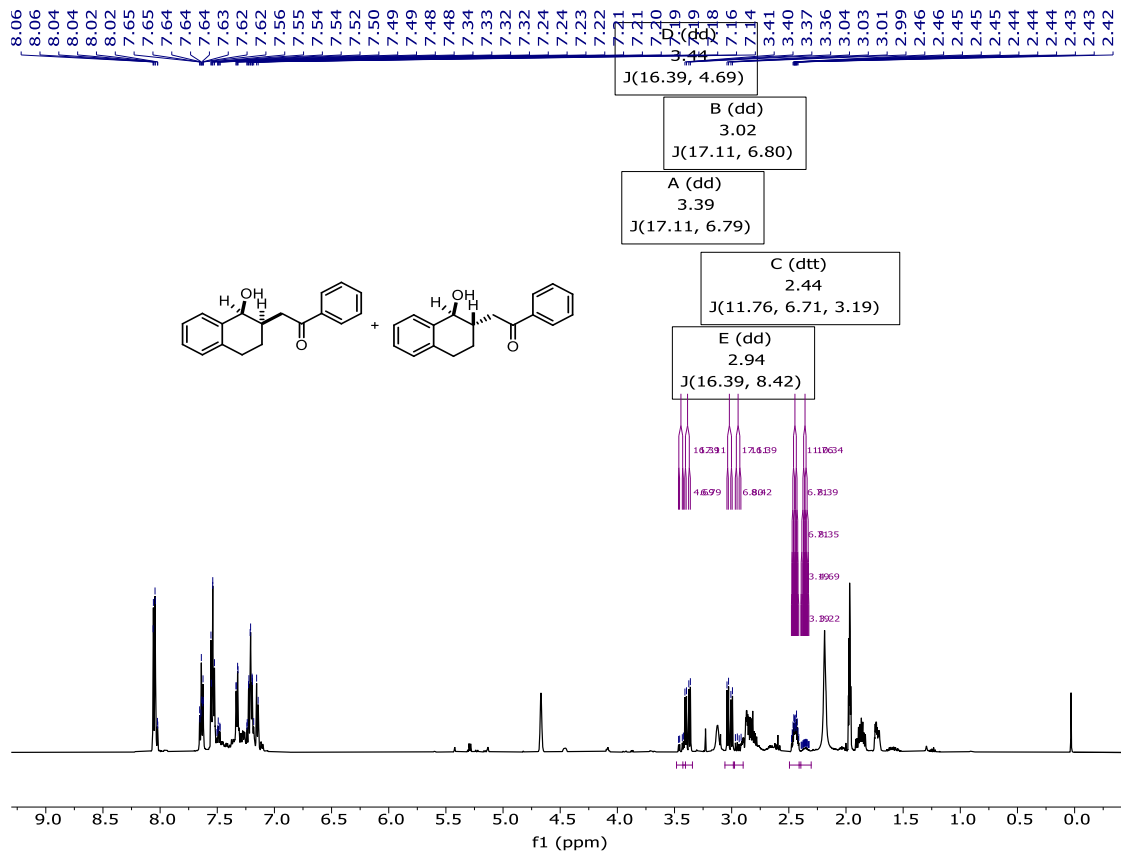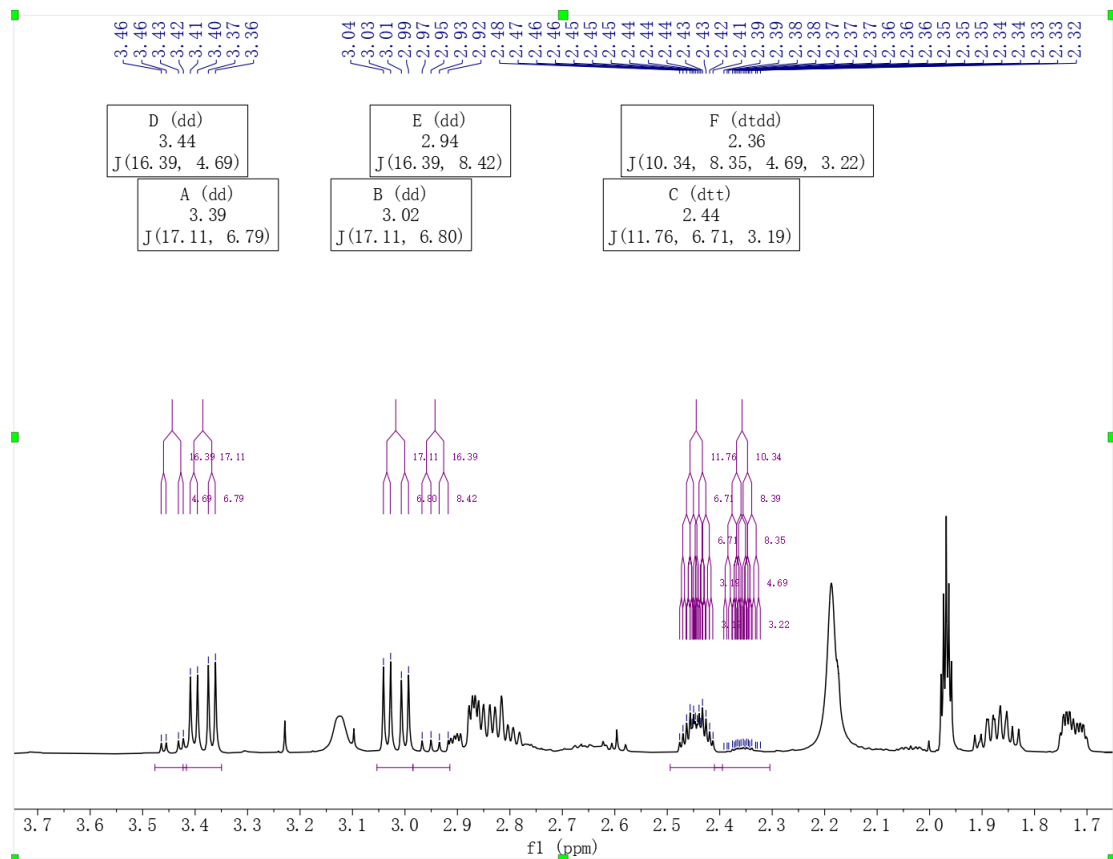

HMBC of rac-29

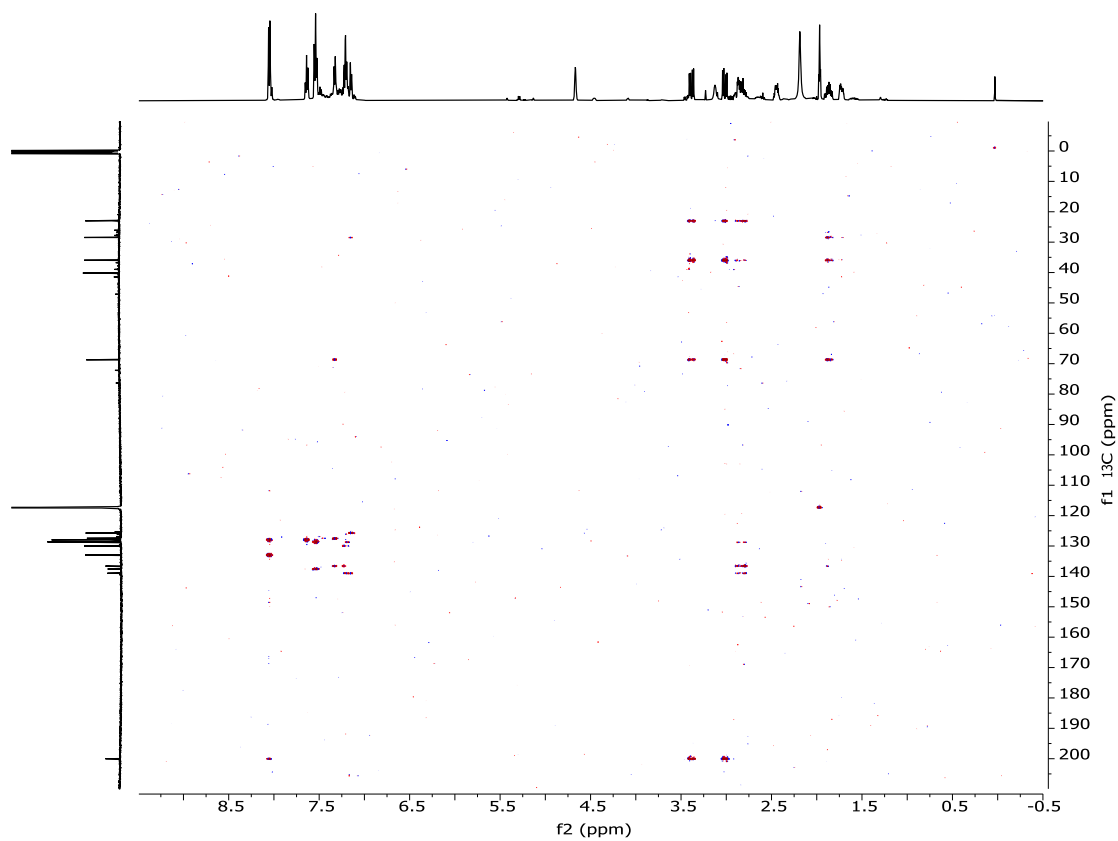

HSQC of **rac-29**

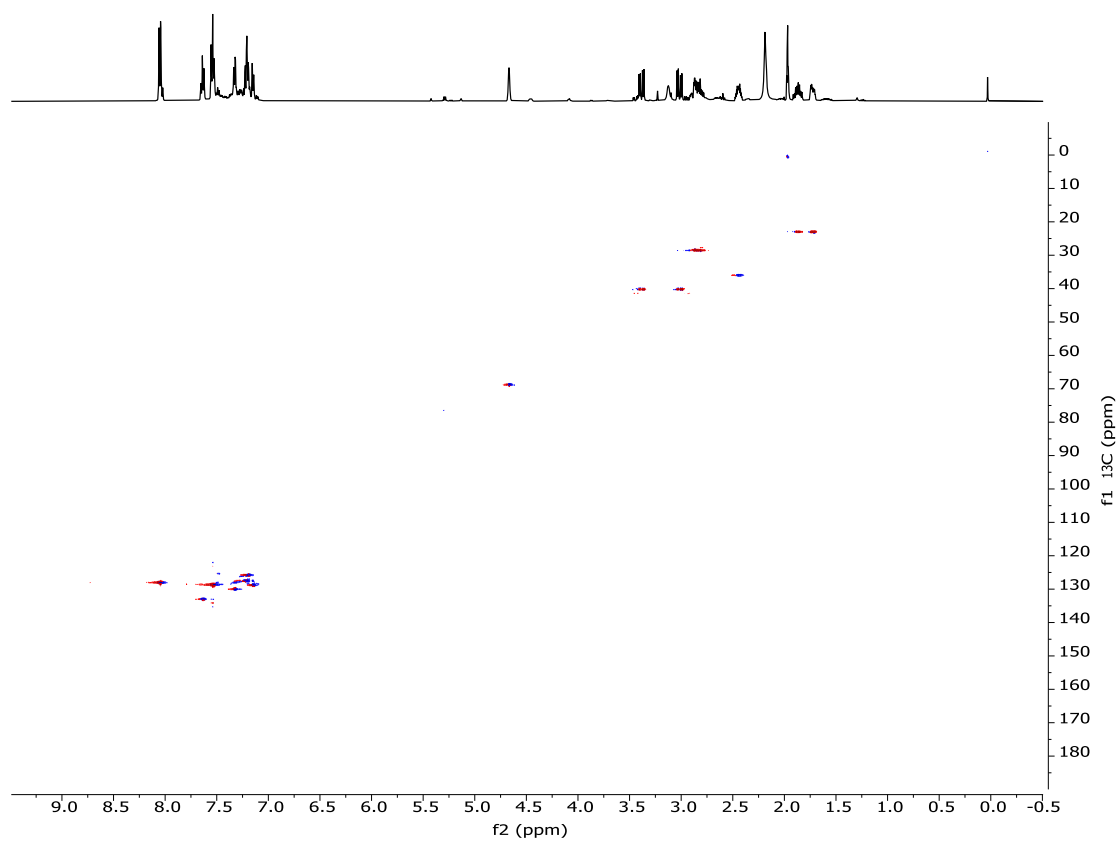

Crude NMR of enzymatic reaction for **29**. Stacked with **rac-29**, the major isomer of the enzymatic

product is assigned to be *cis*. There is barely *trans*-isomer in enzymatic reaction.

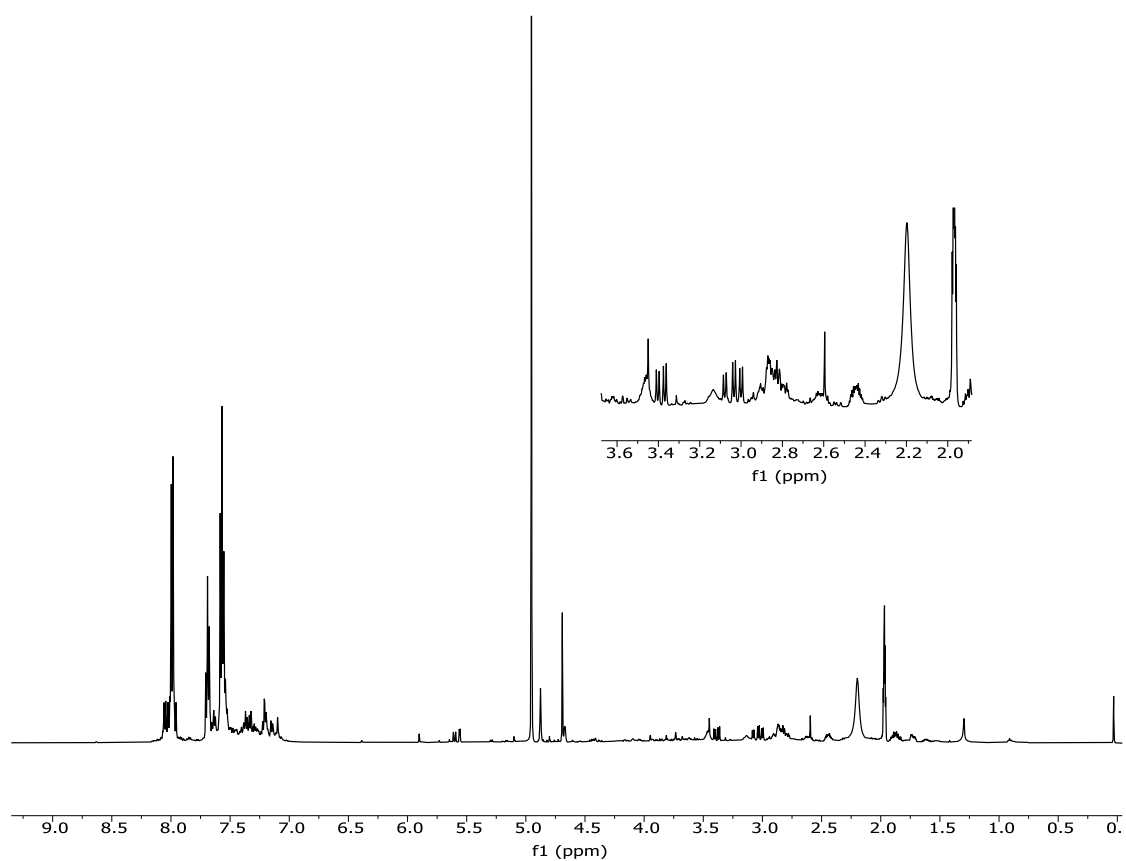

Crude NMR of enzymatic reaction stacked with **rac-29**:

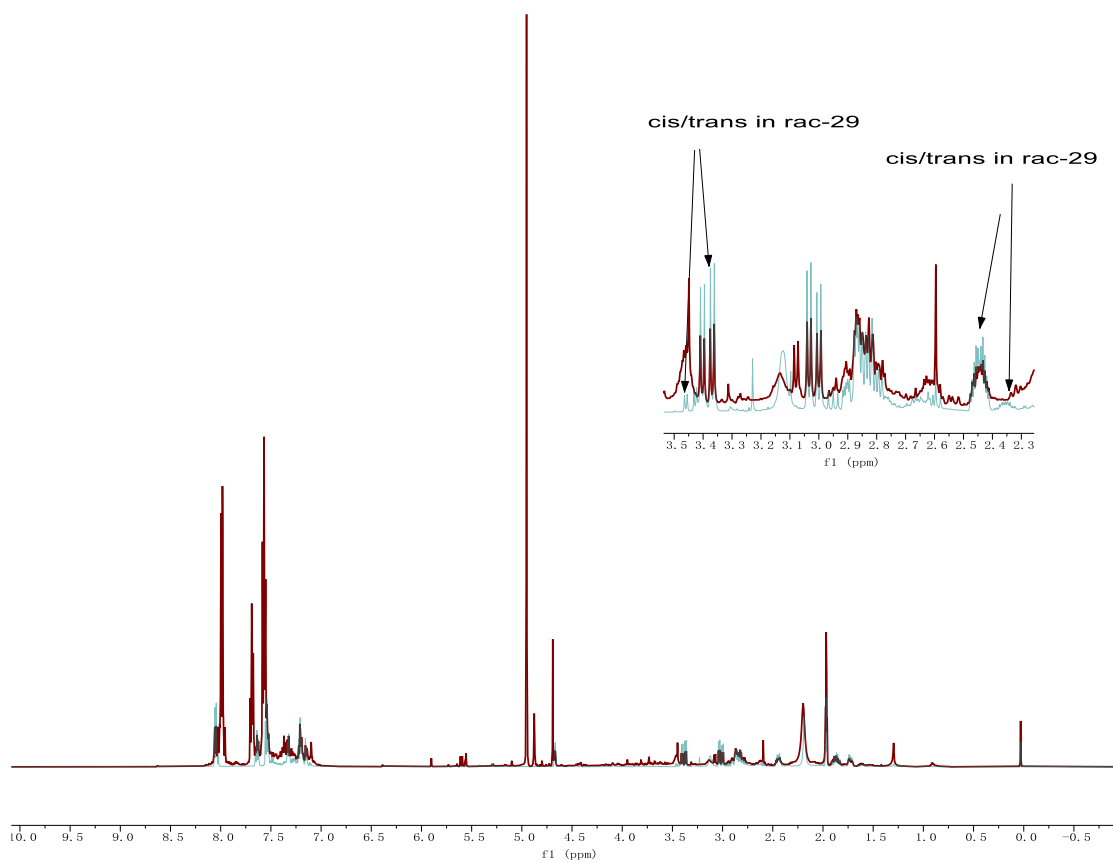

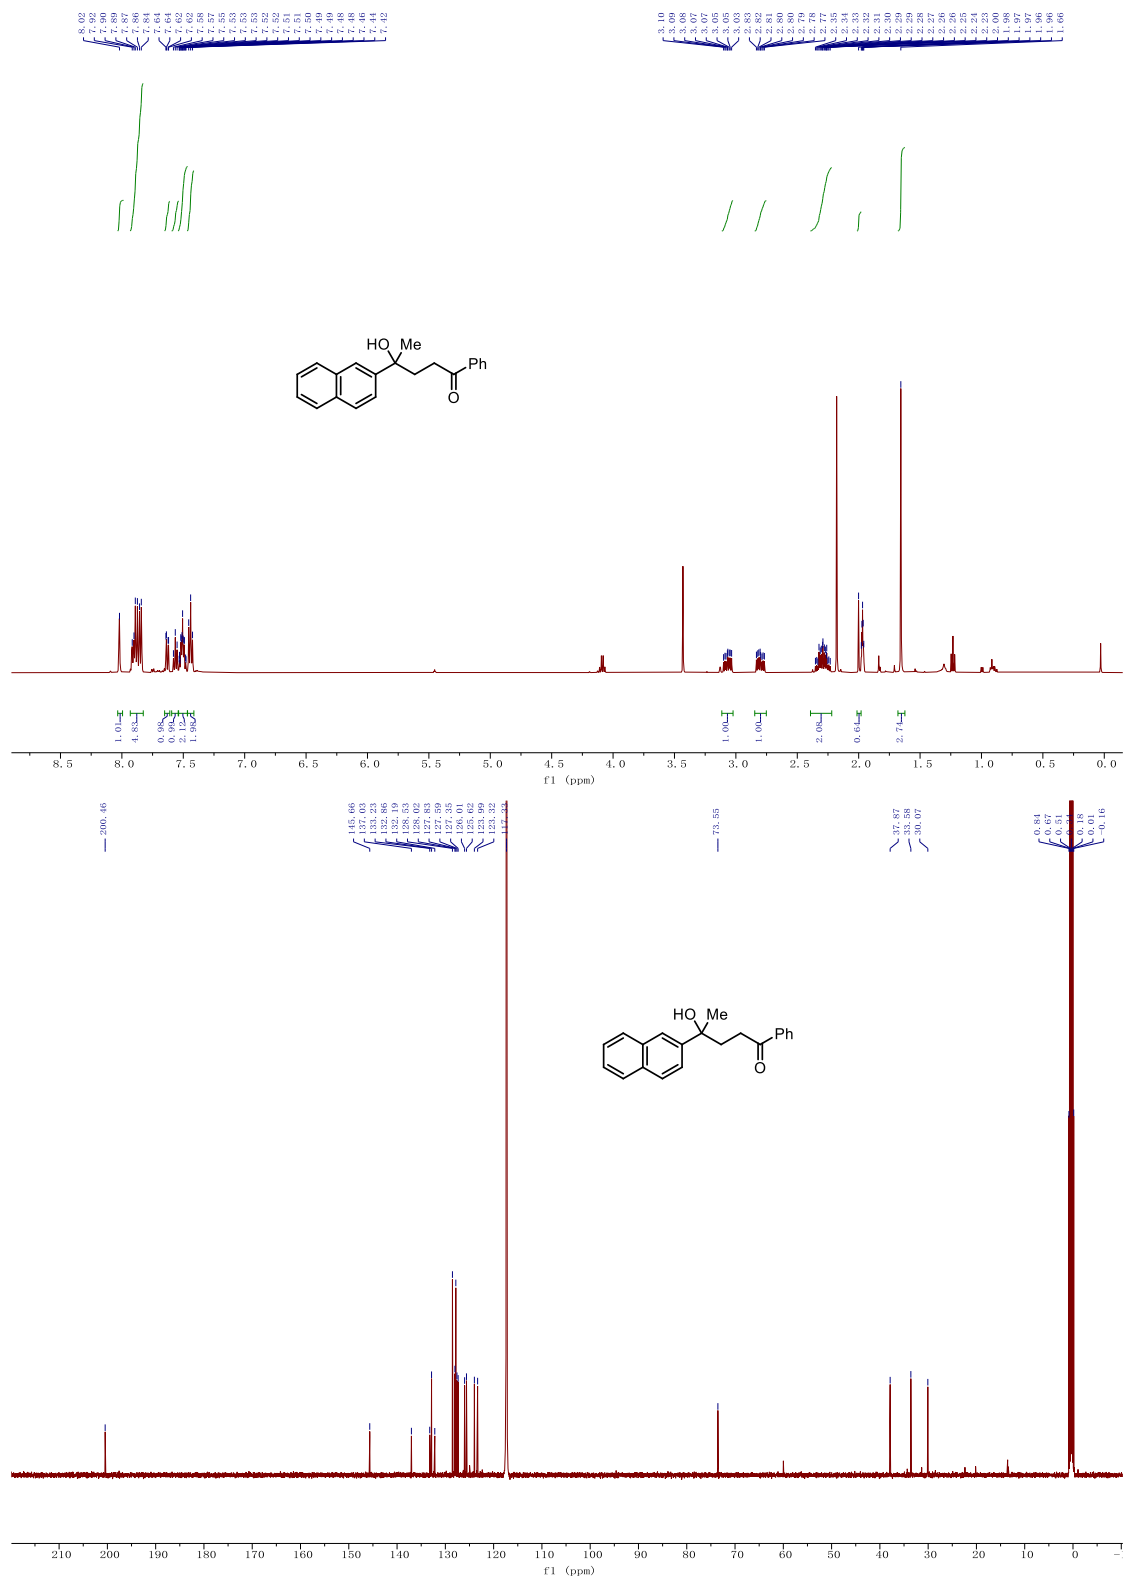

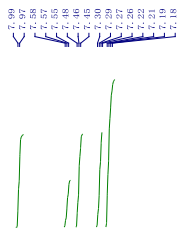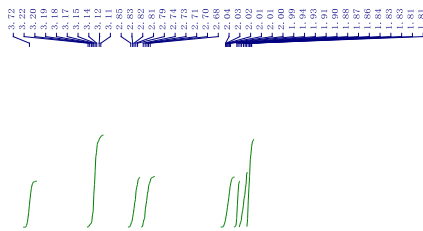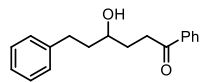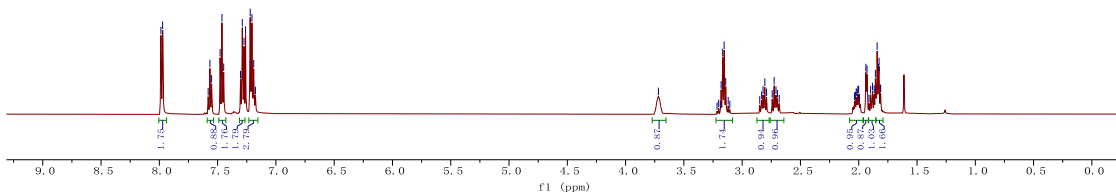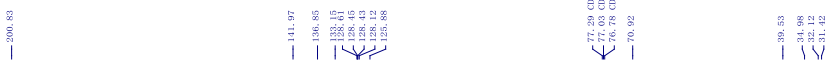



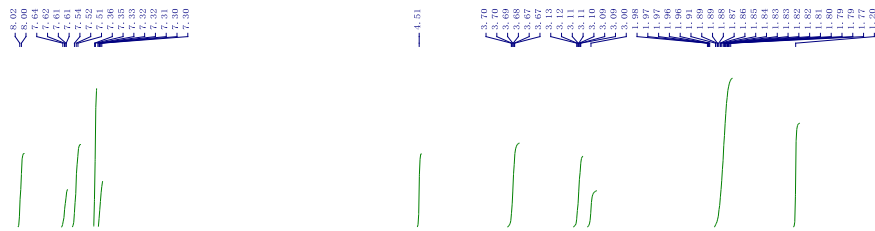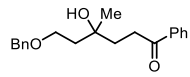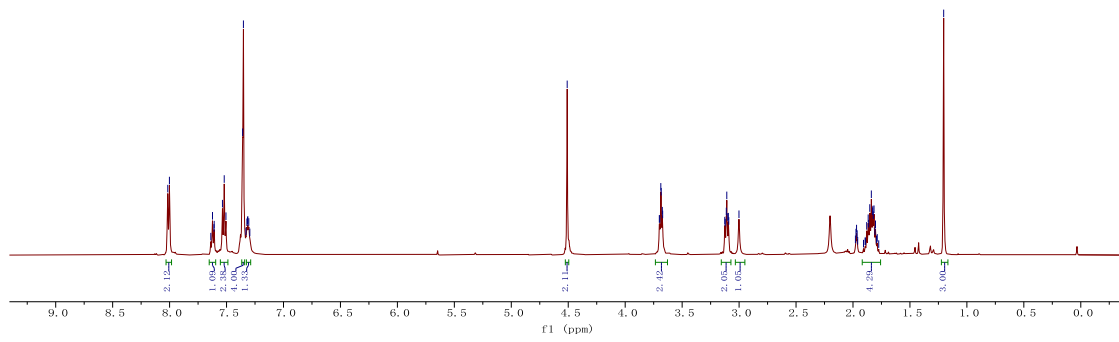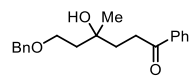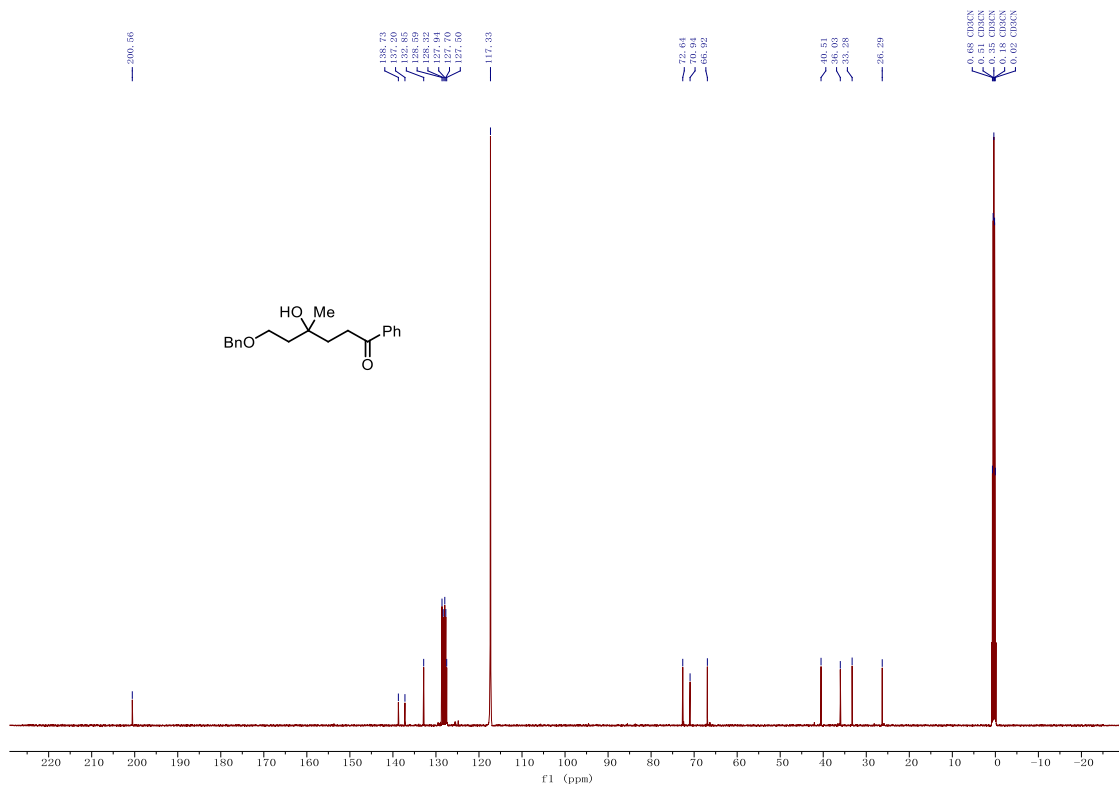

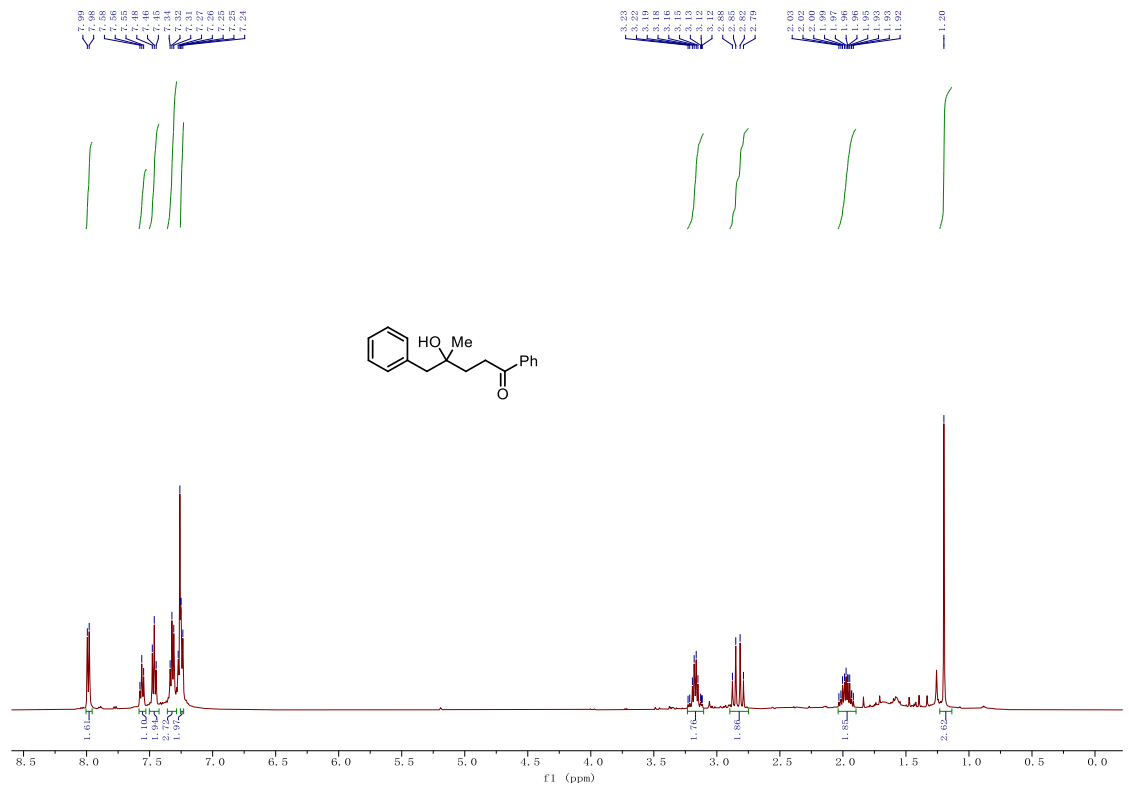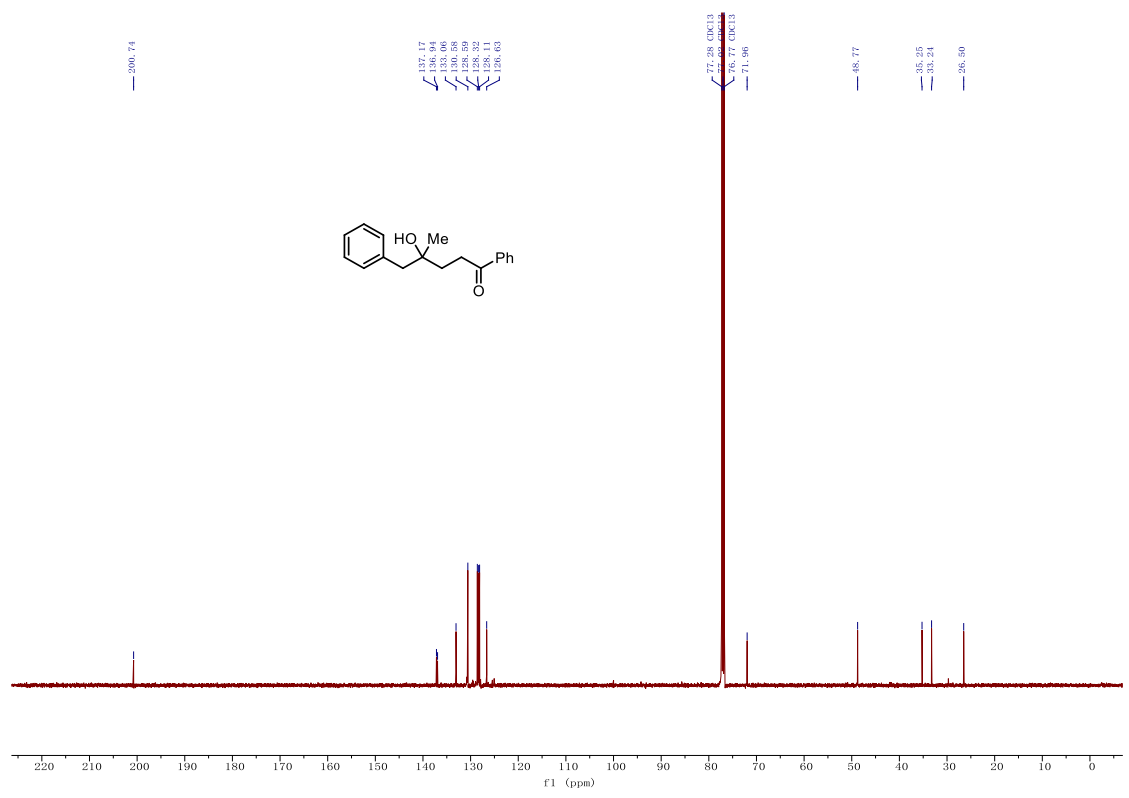



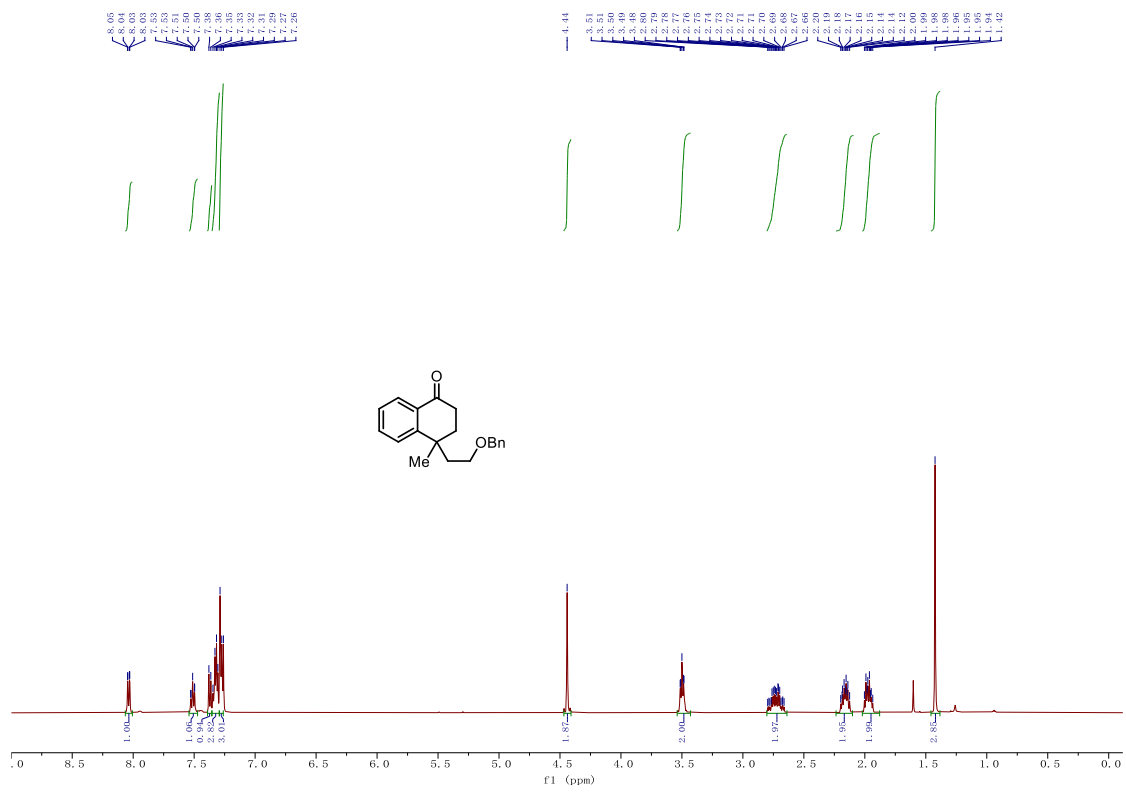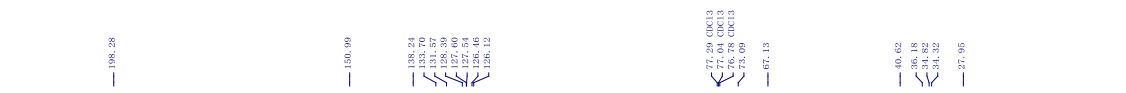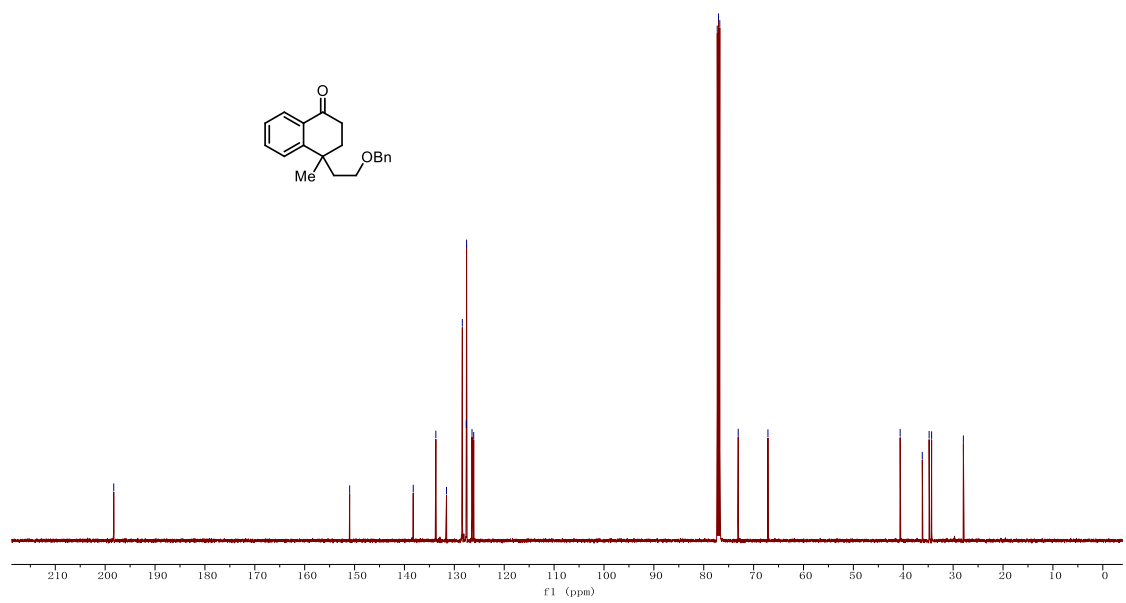

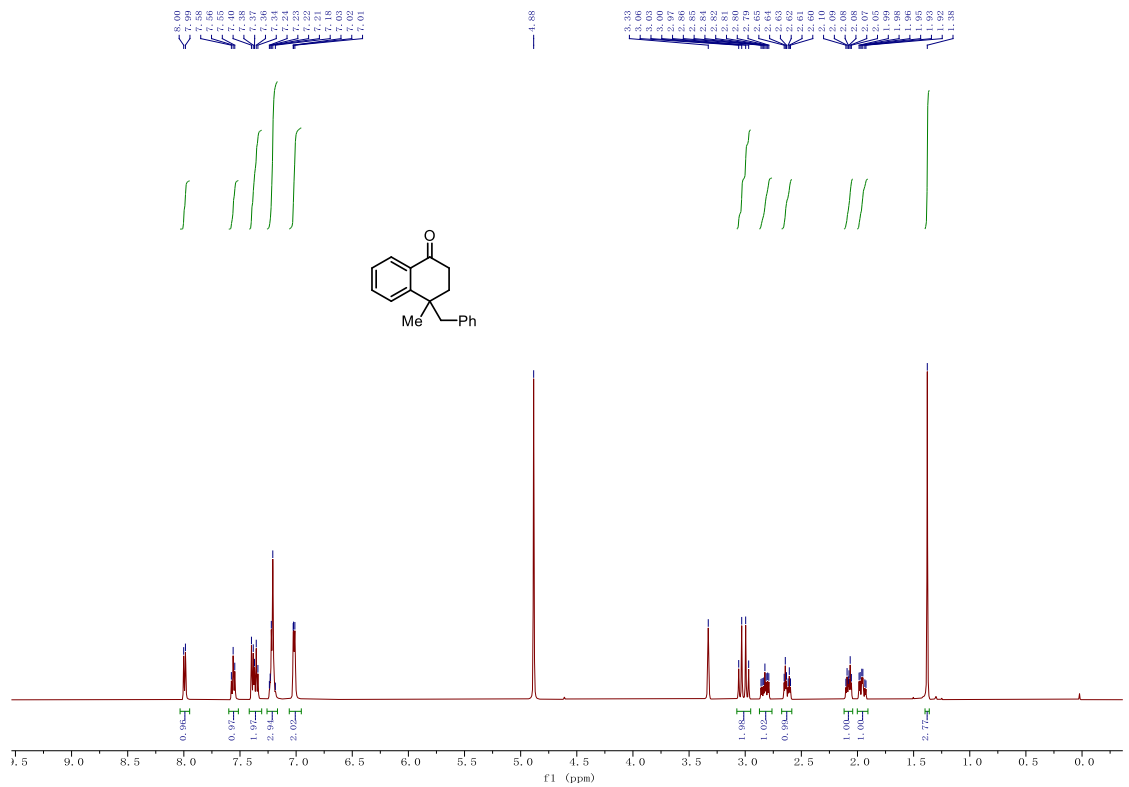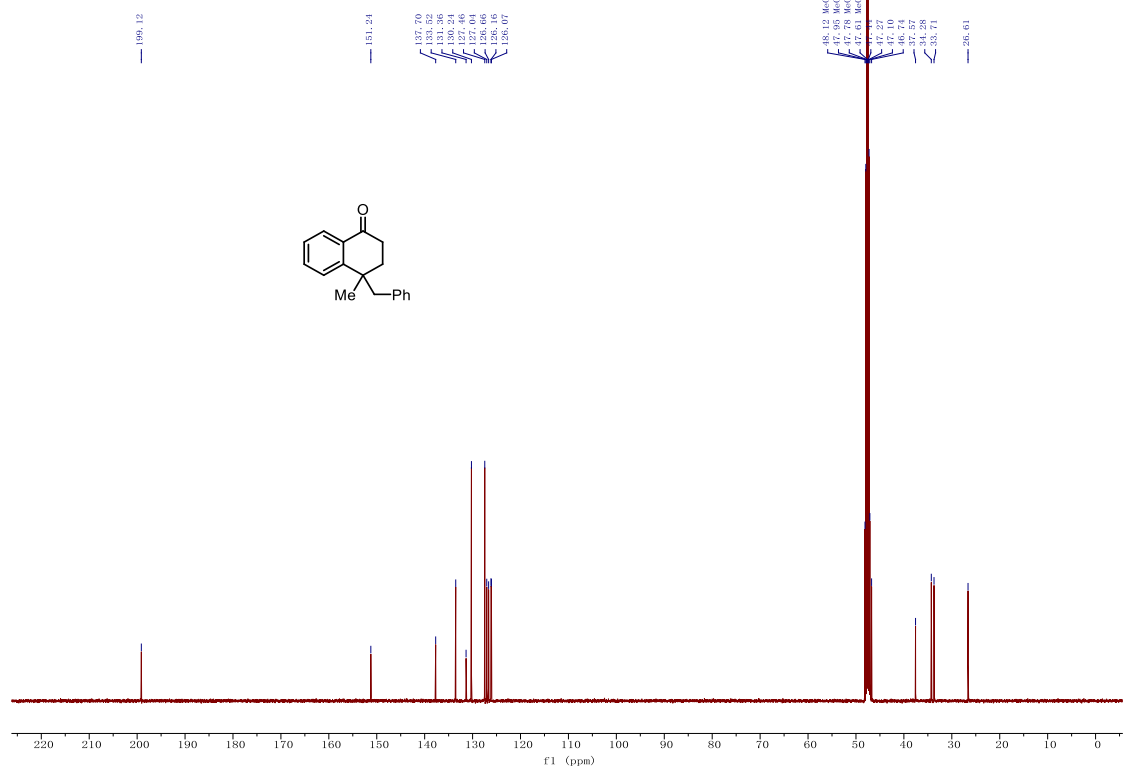

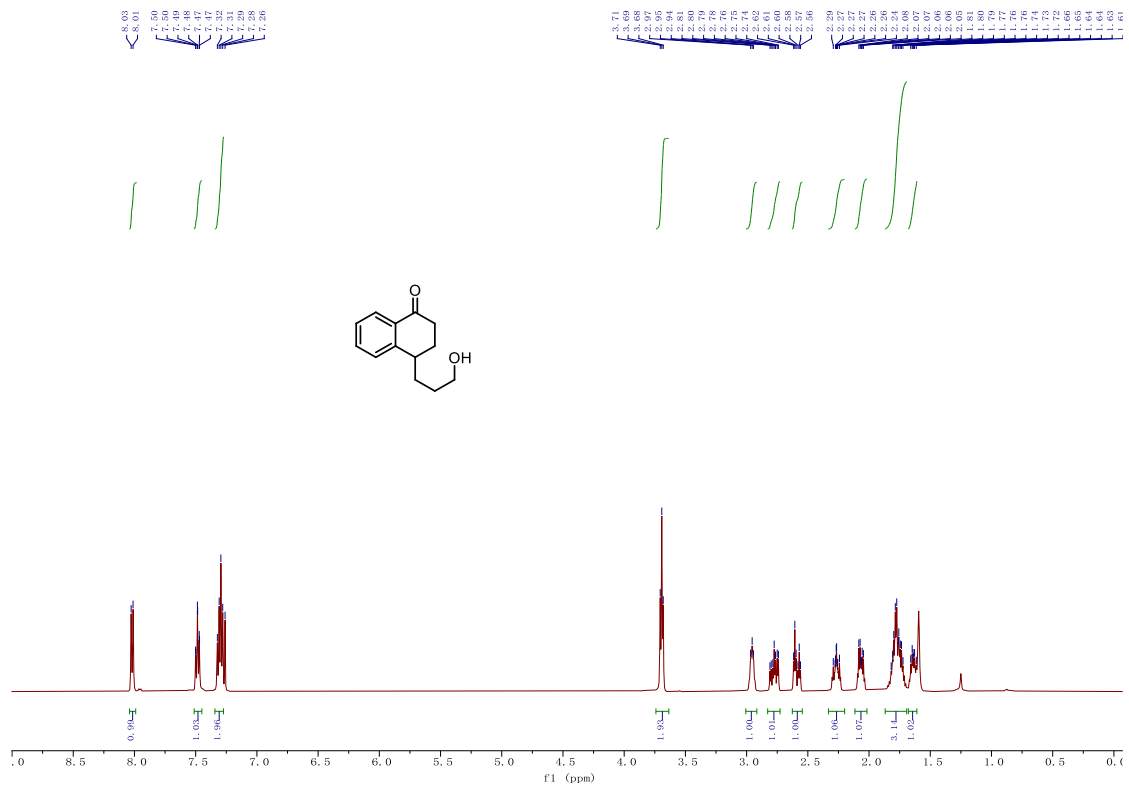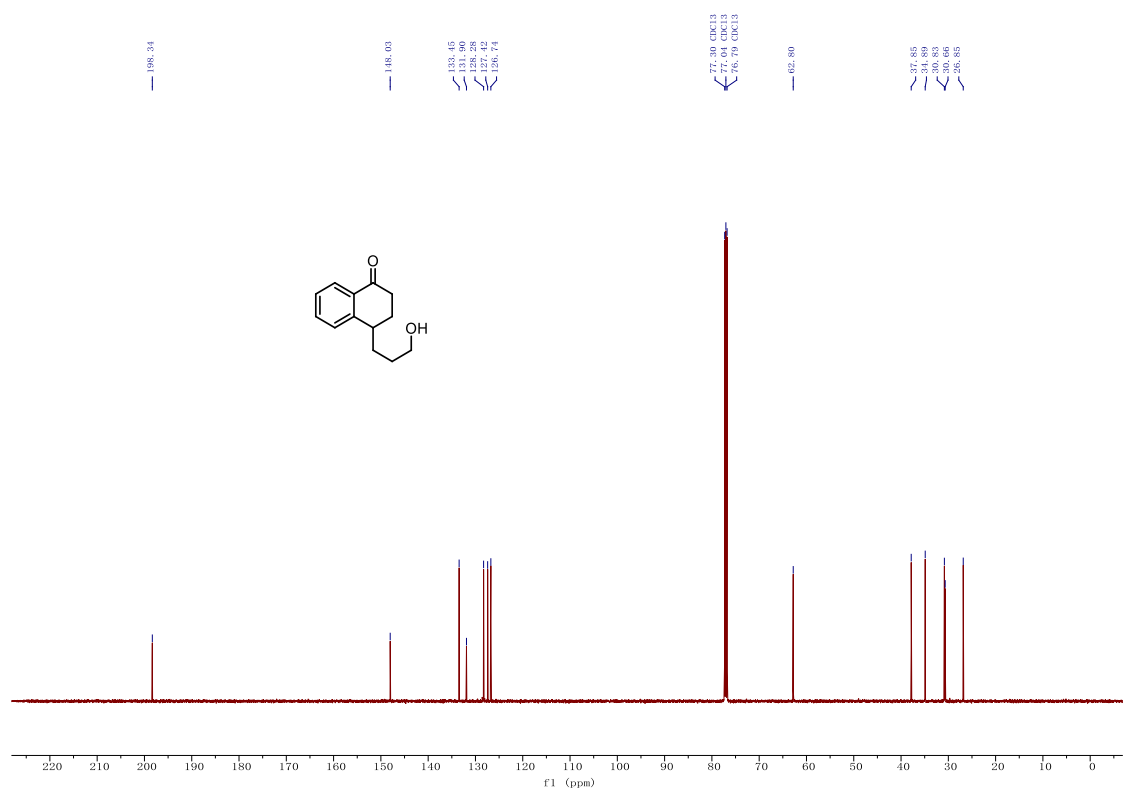

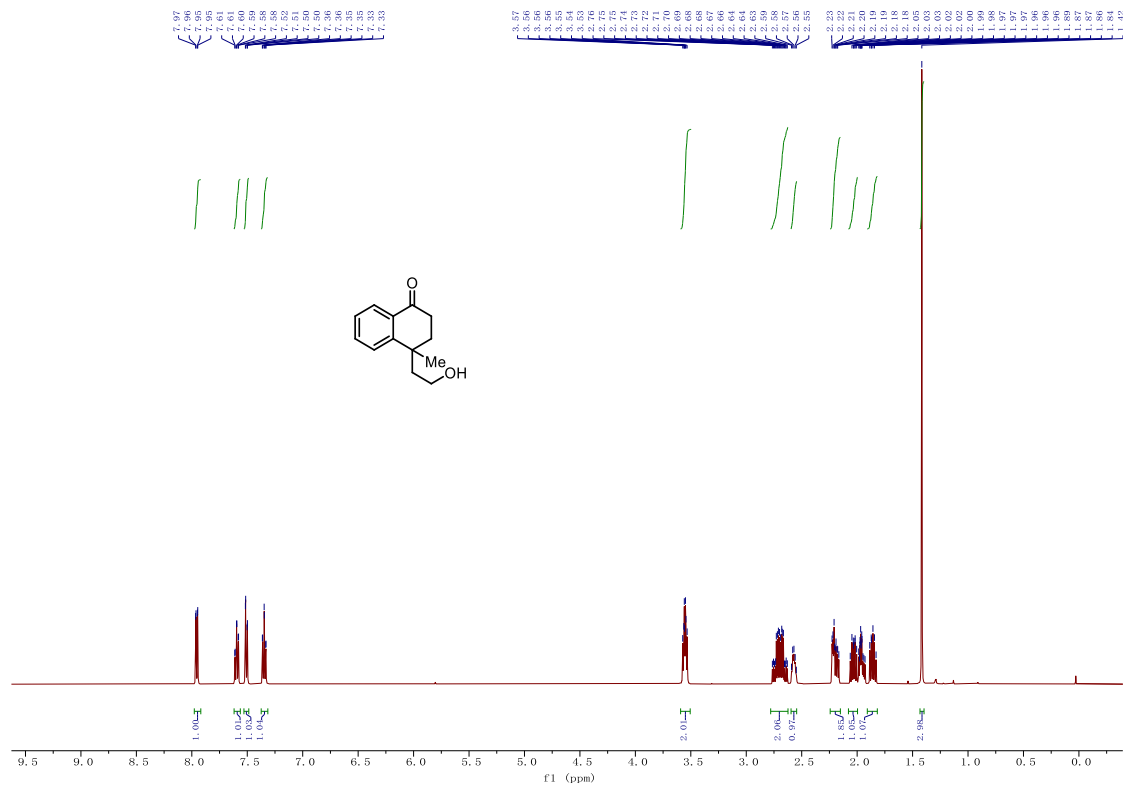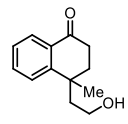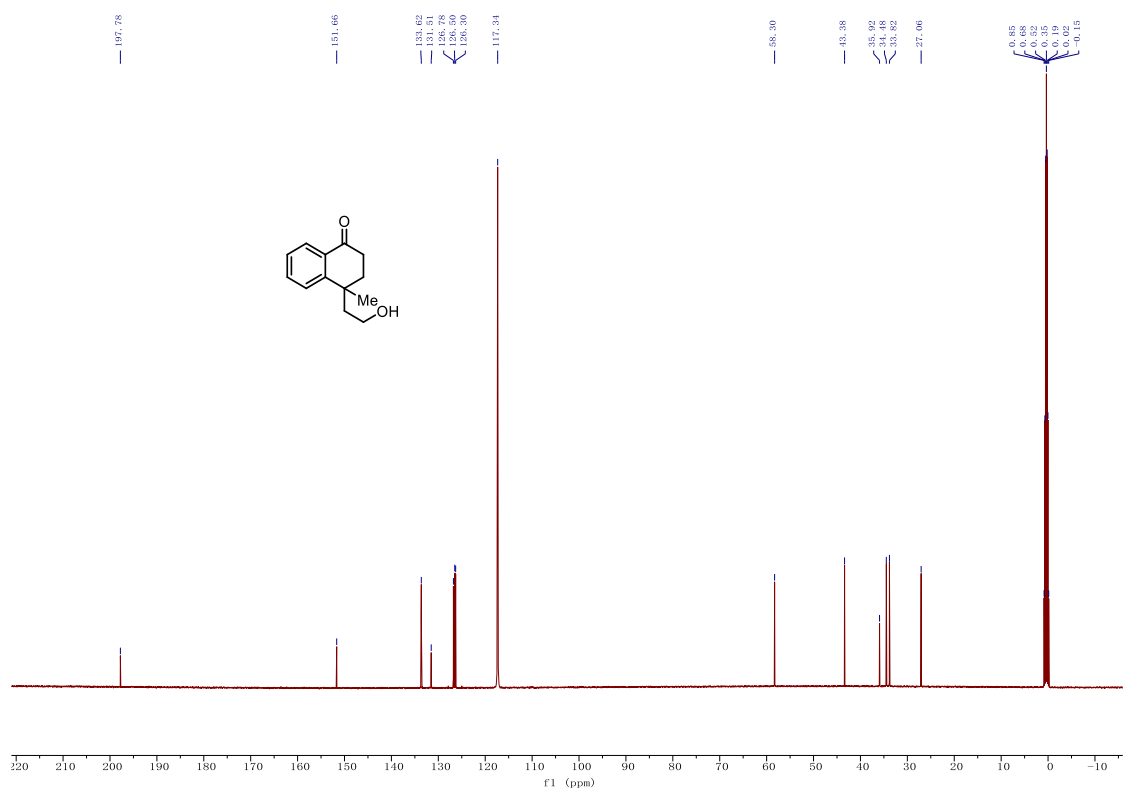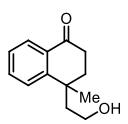







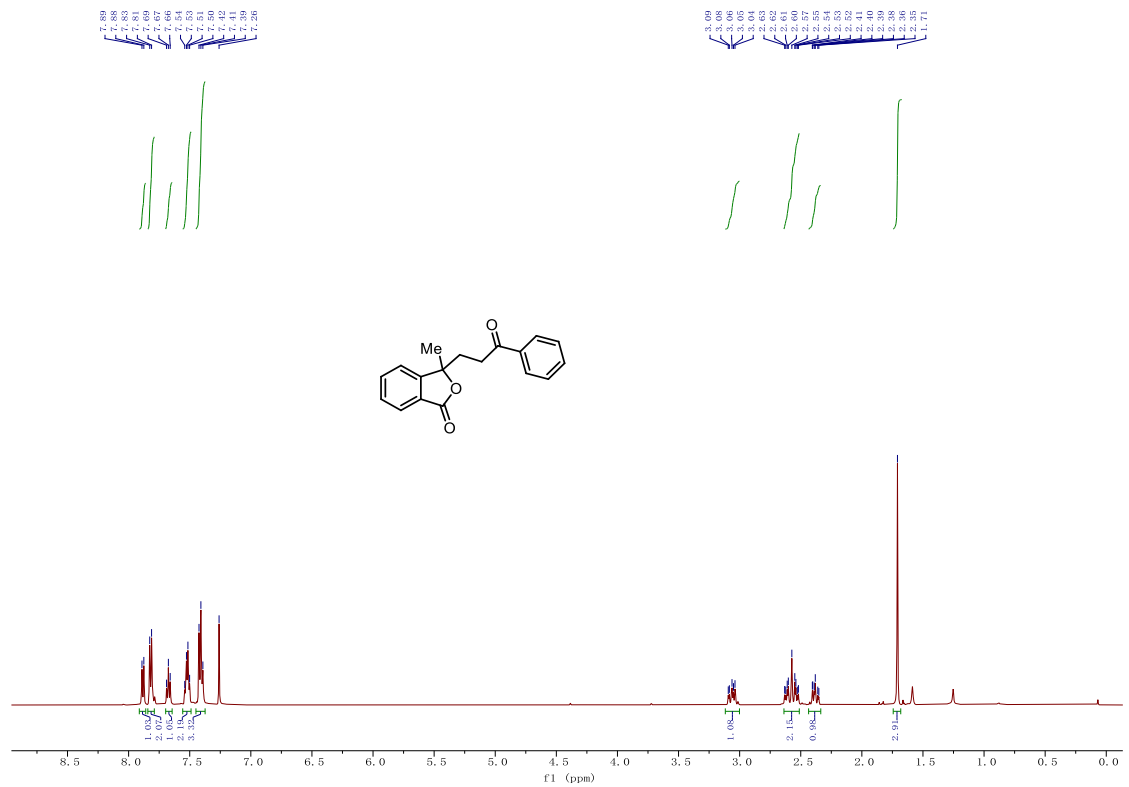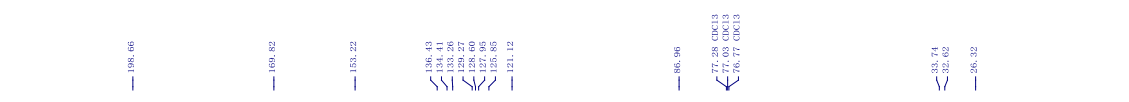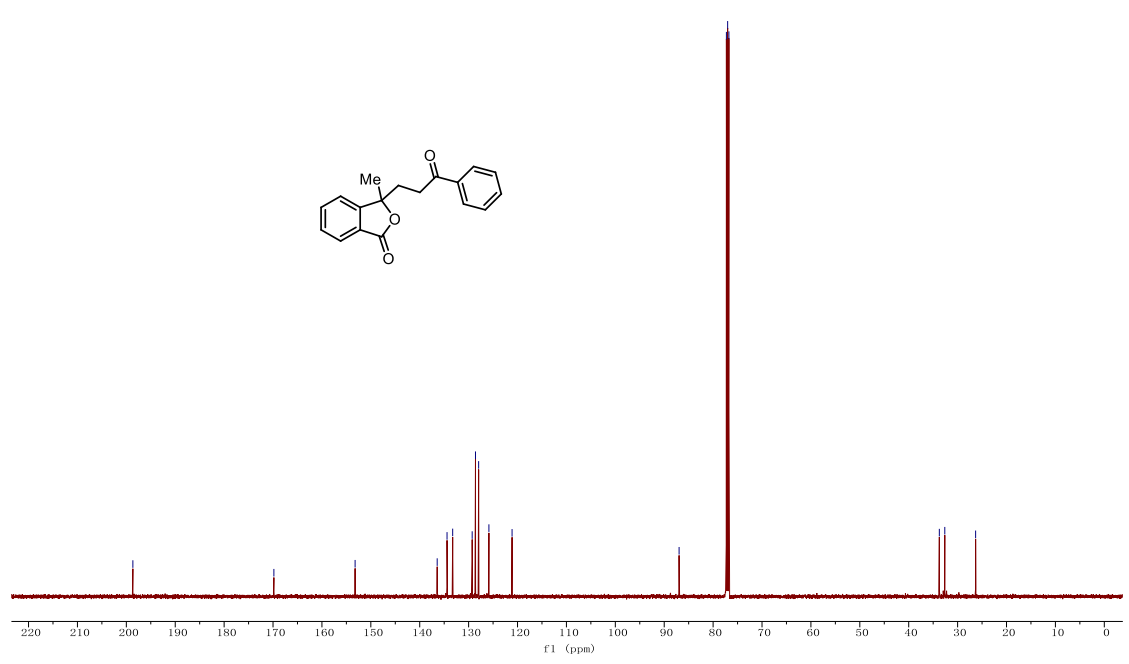



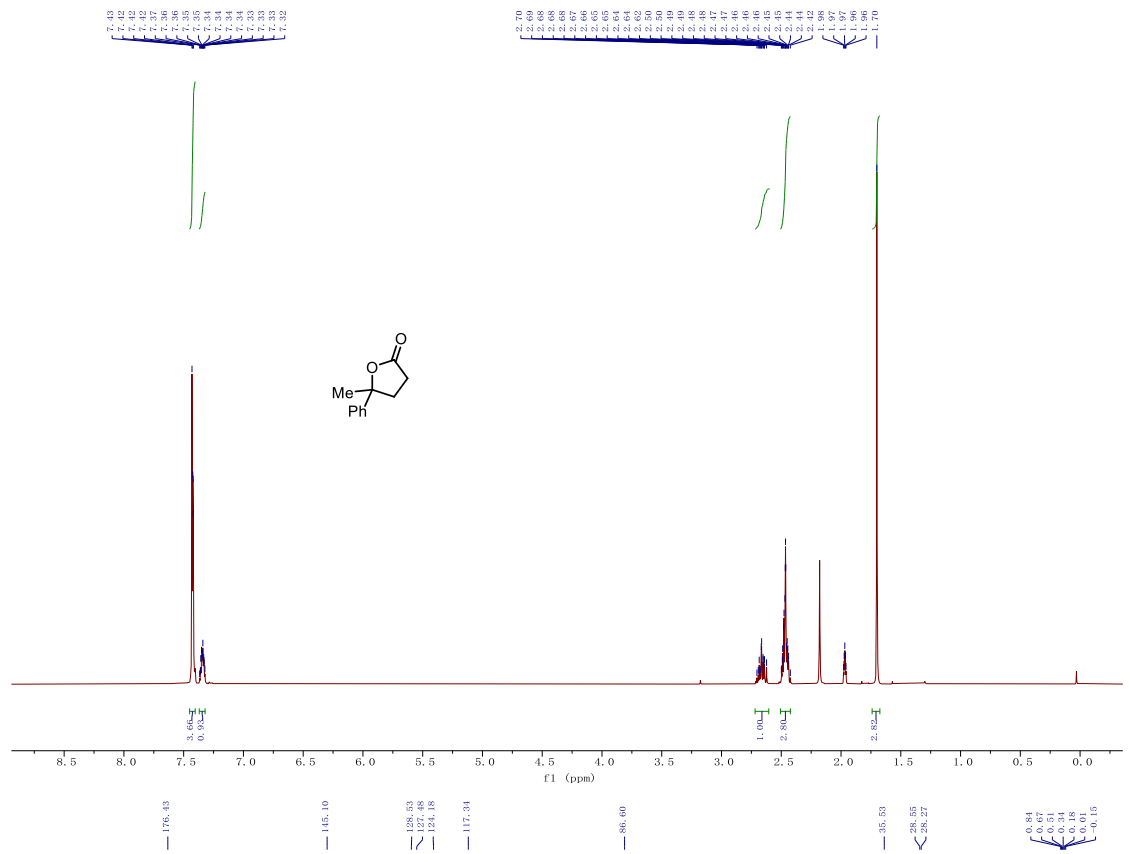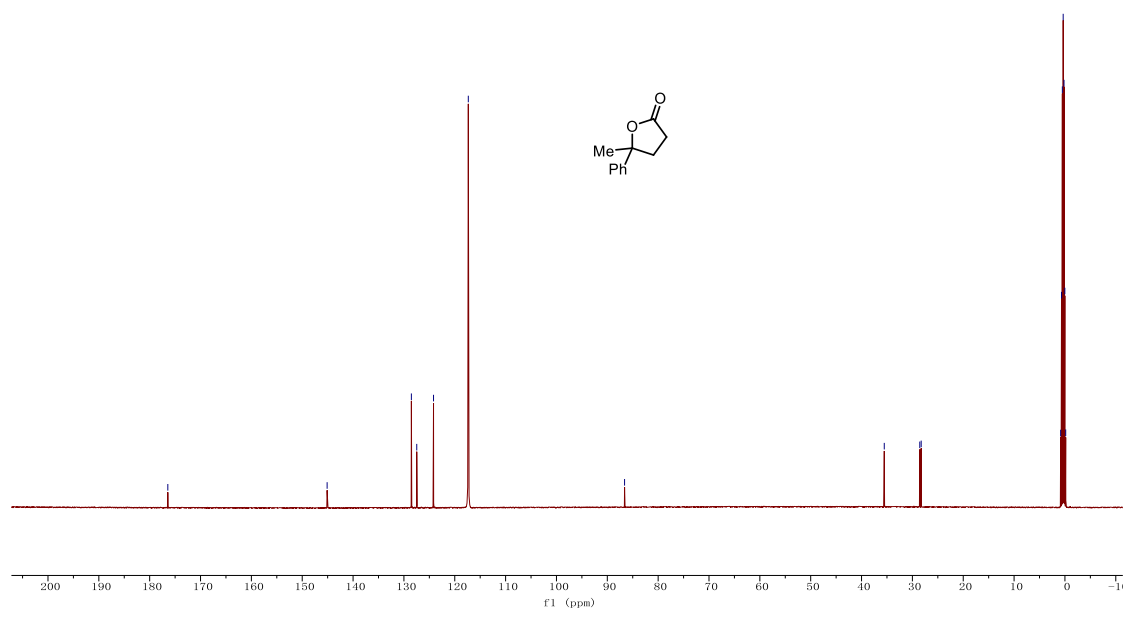



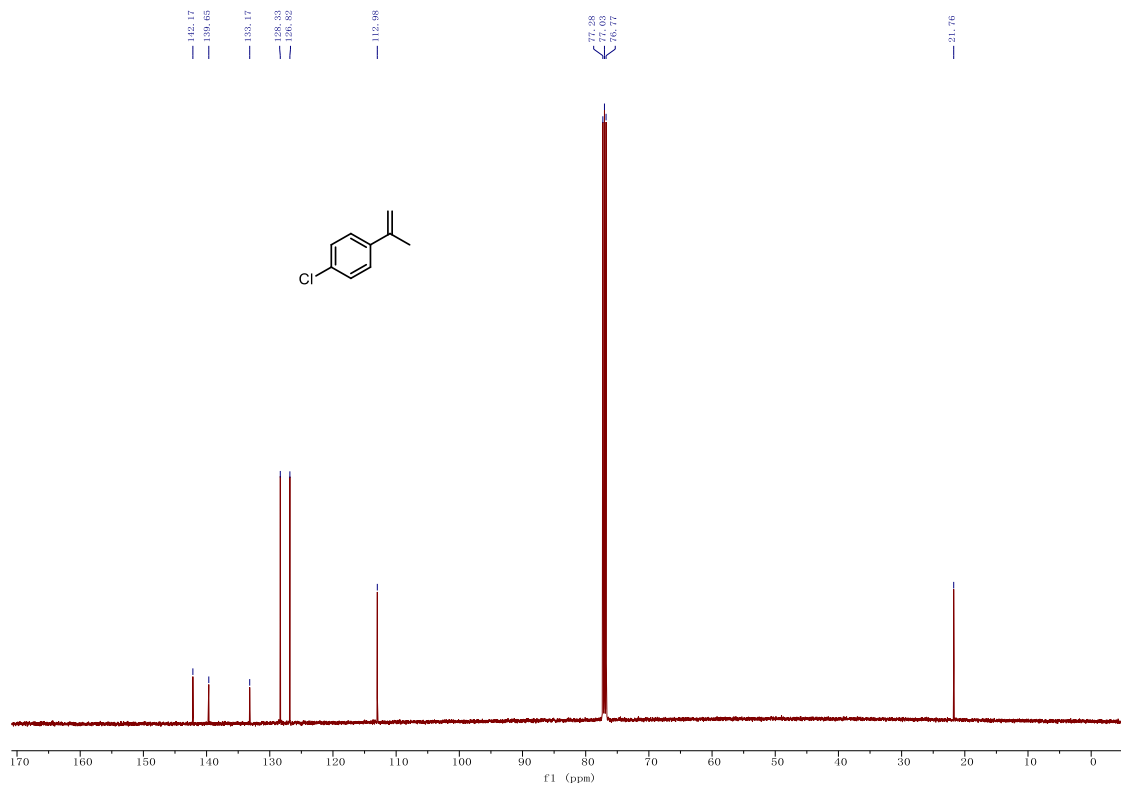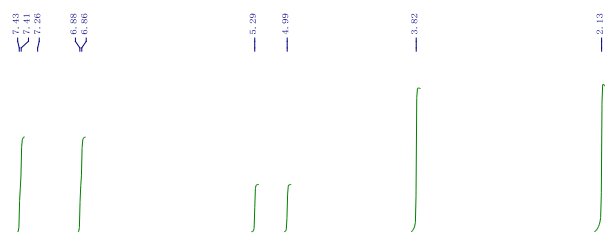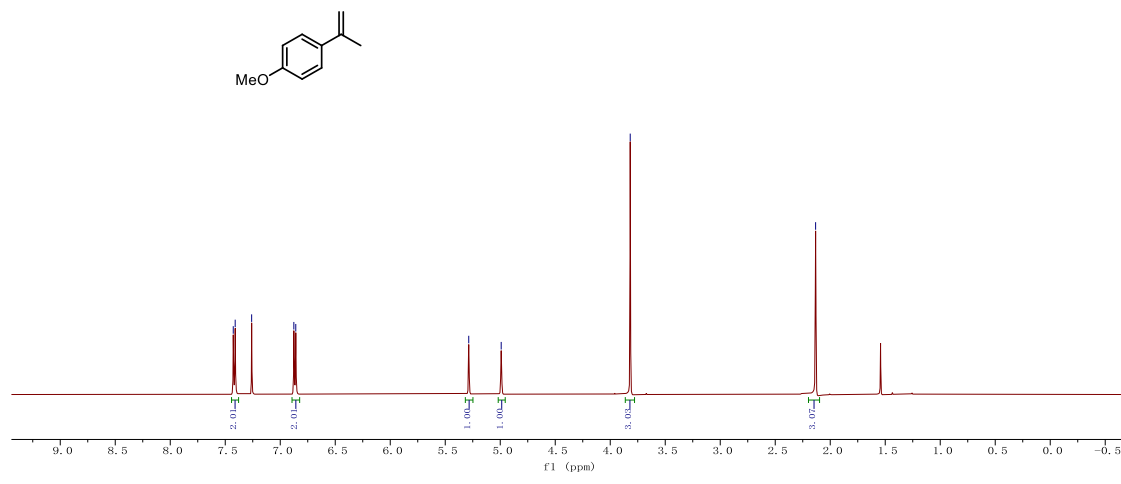

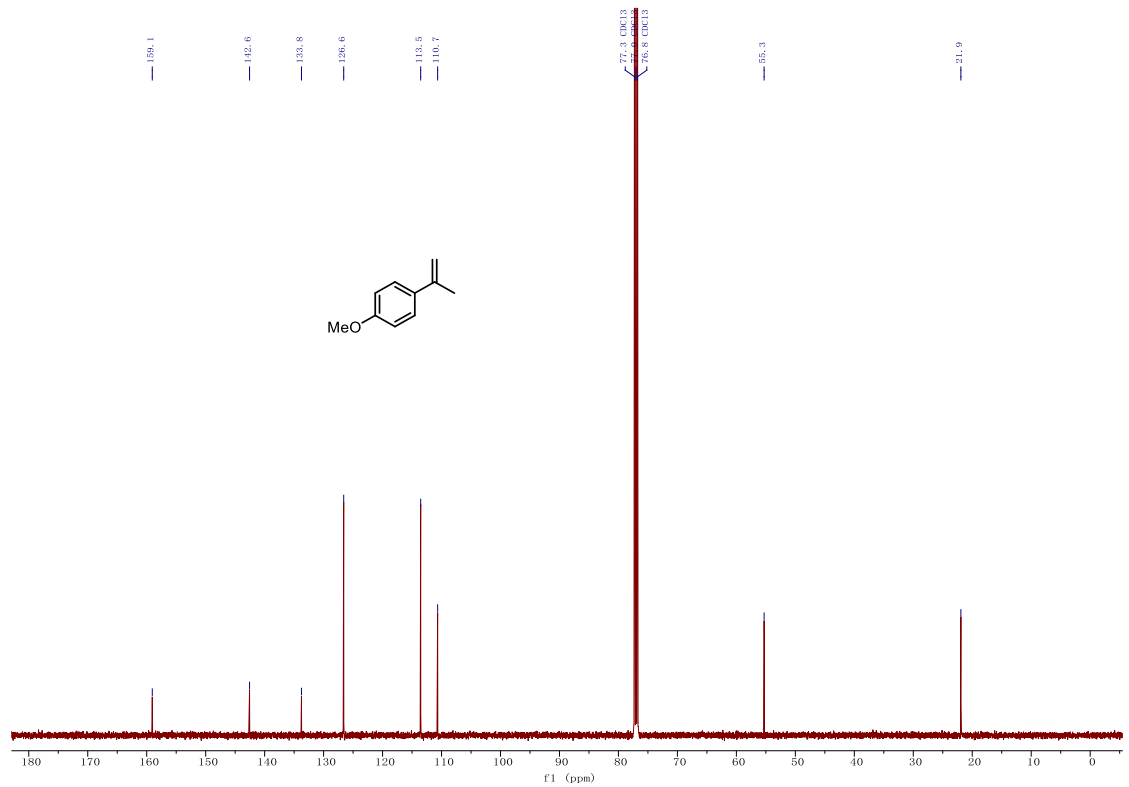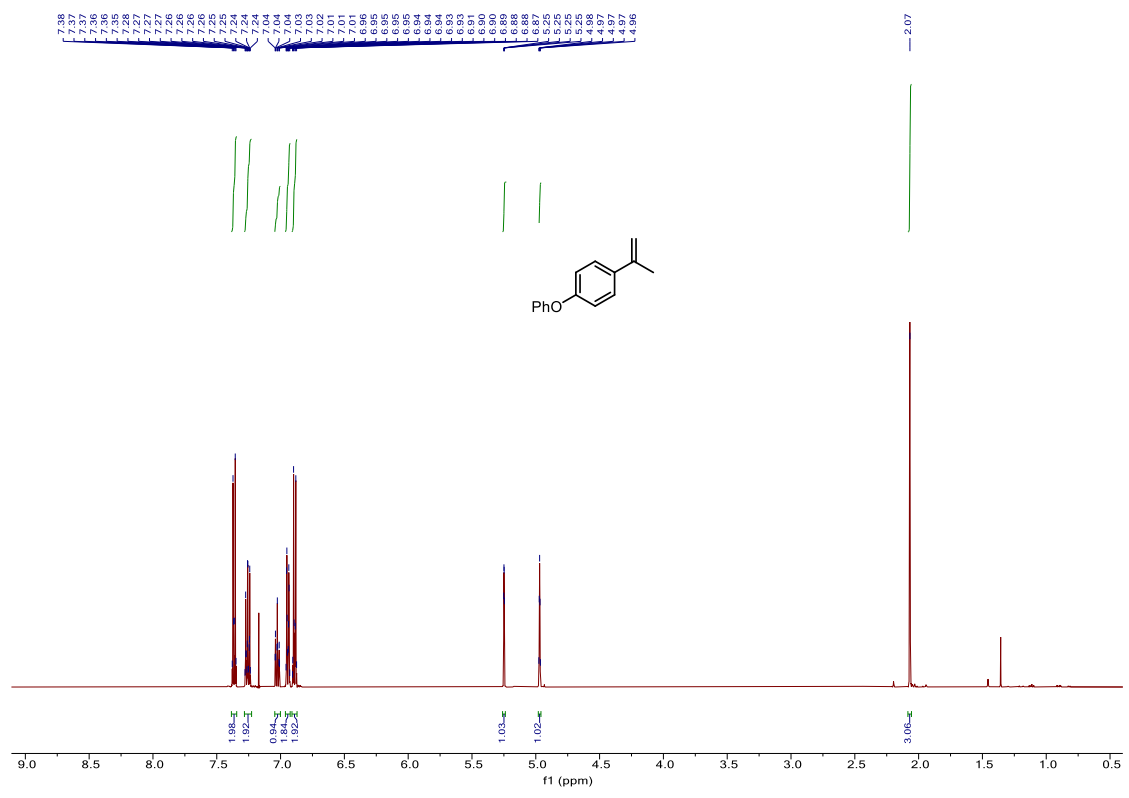

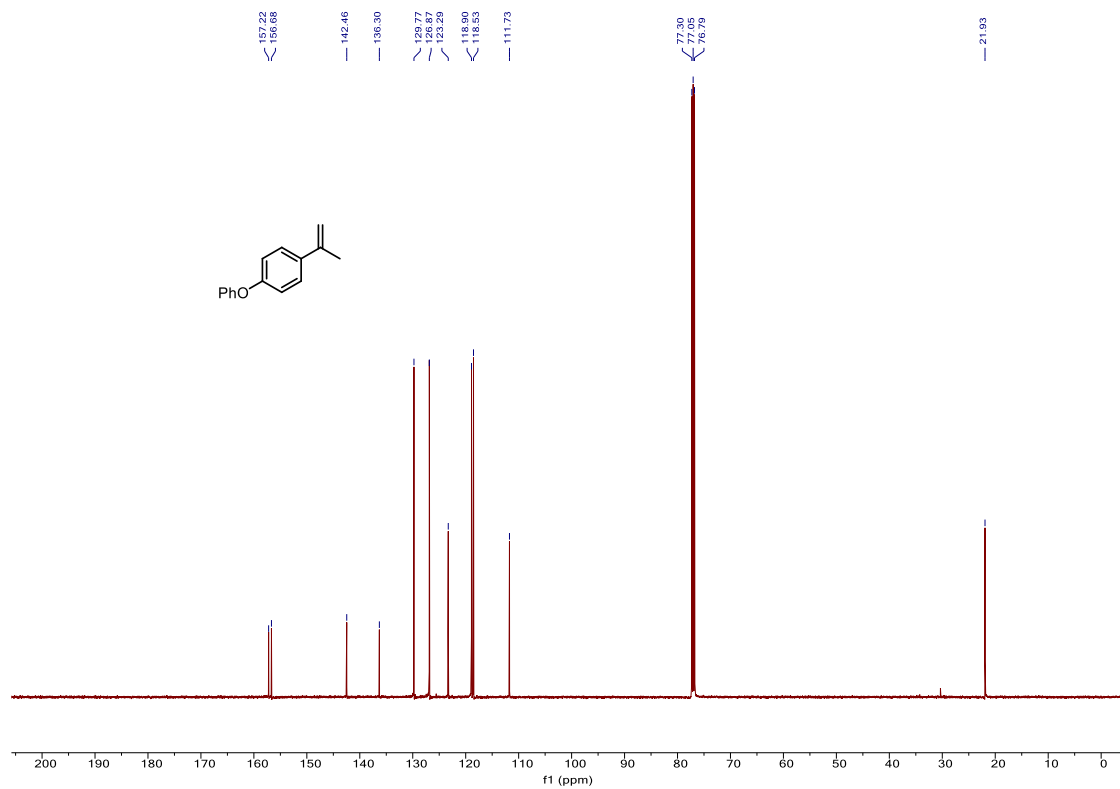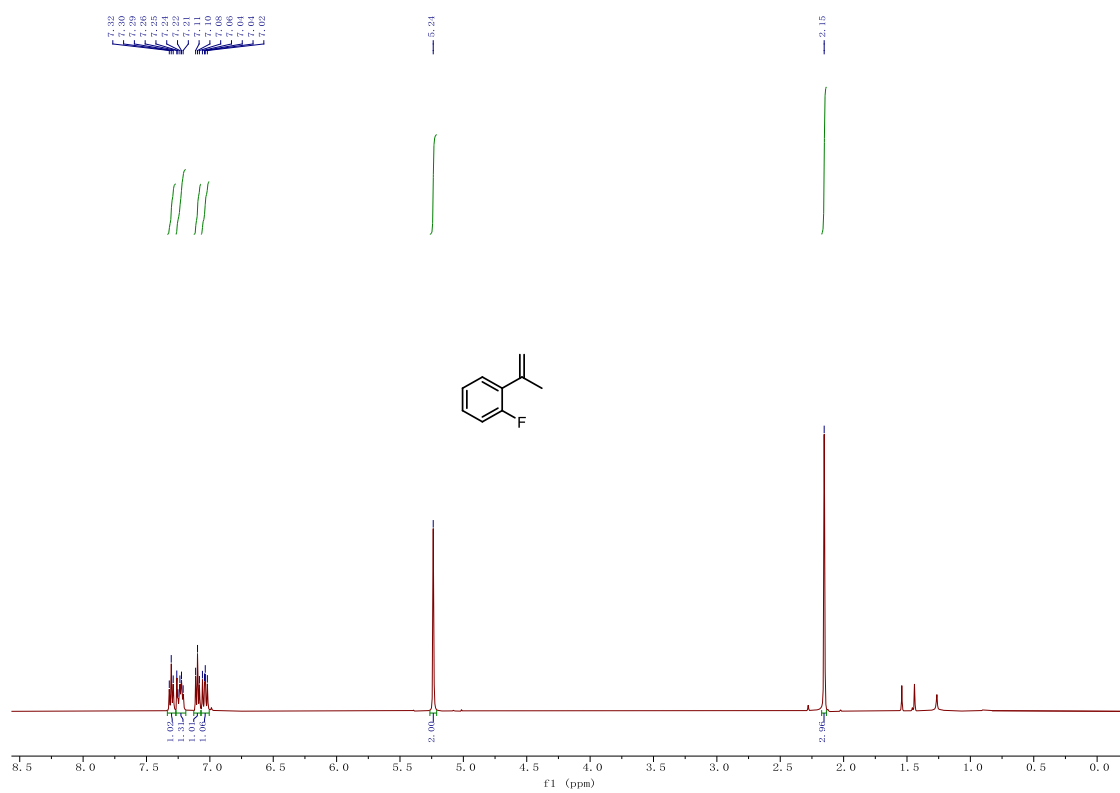



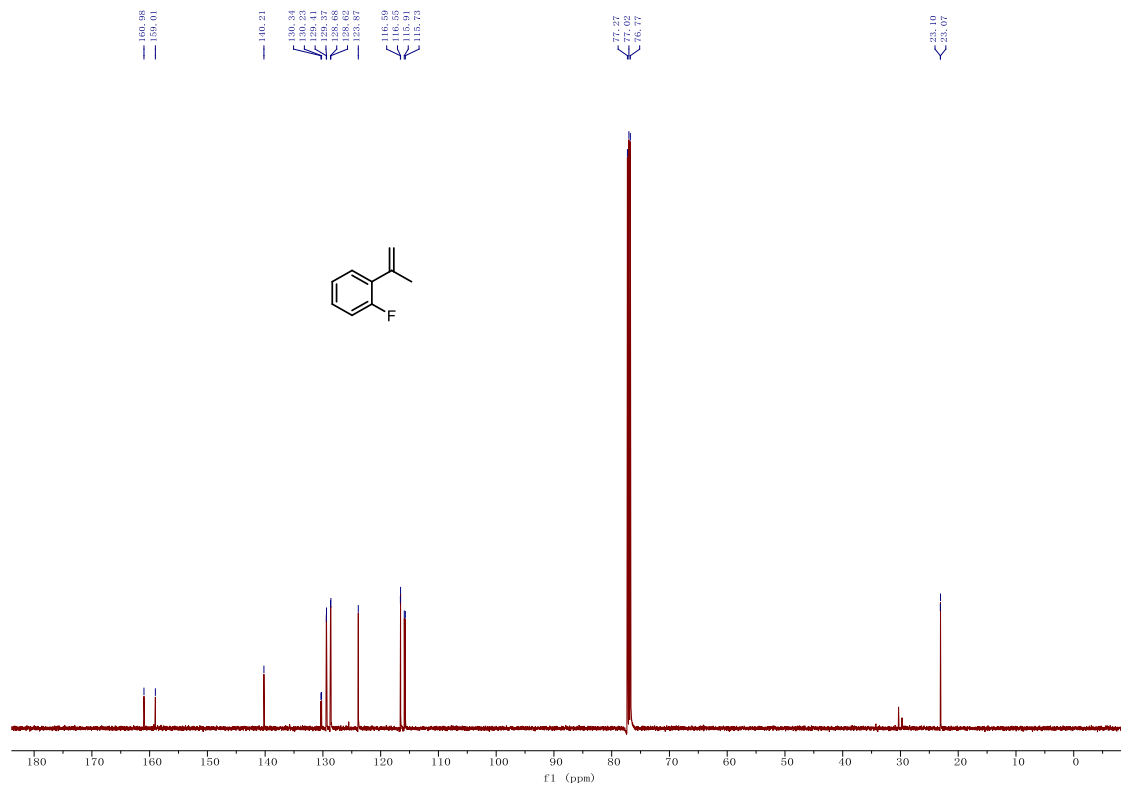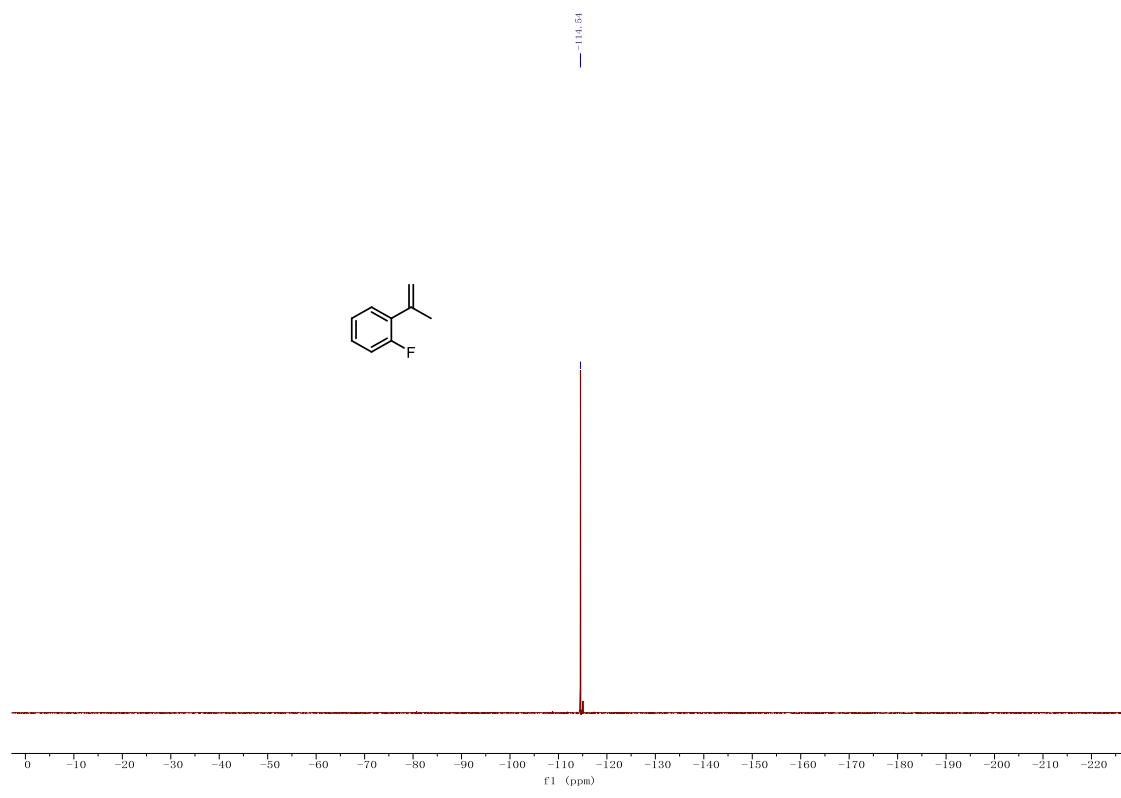

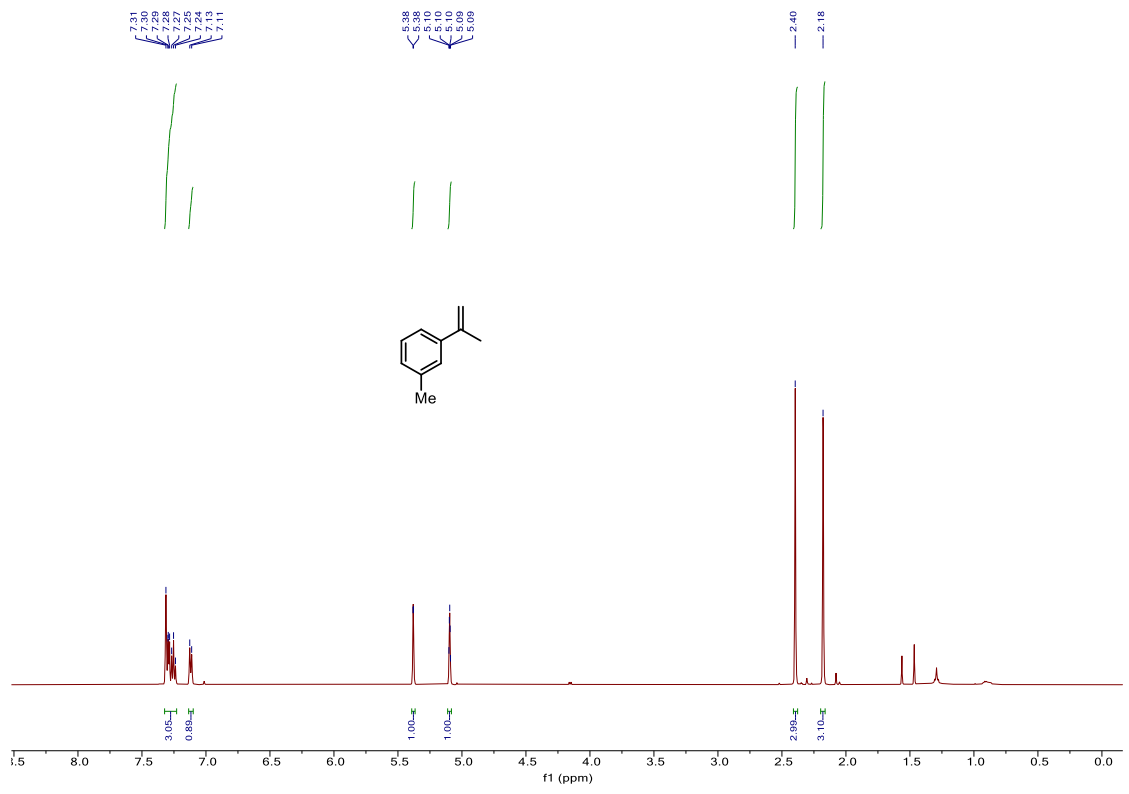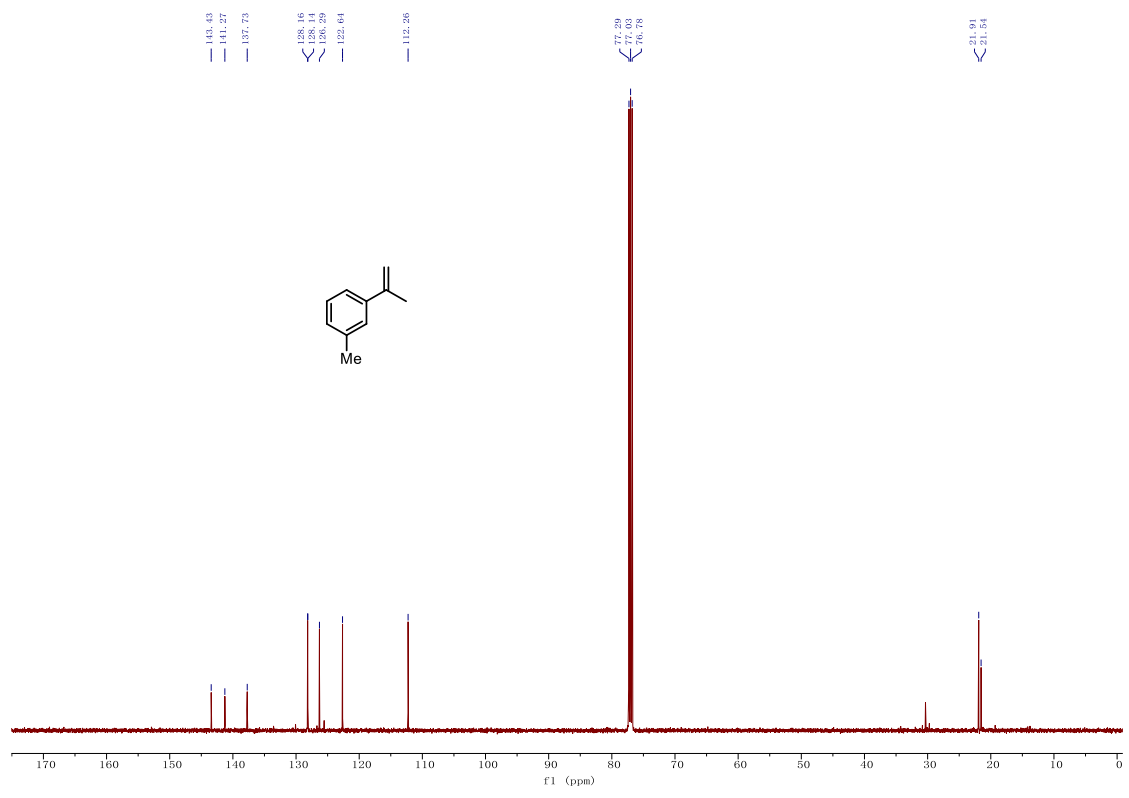

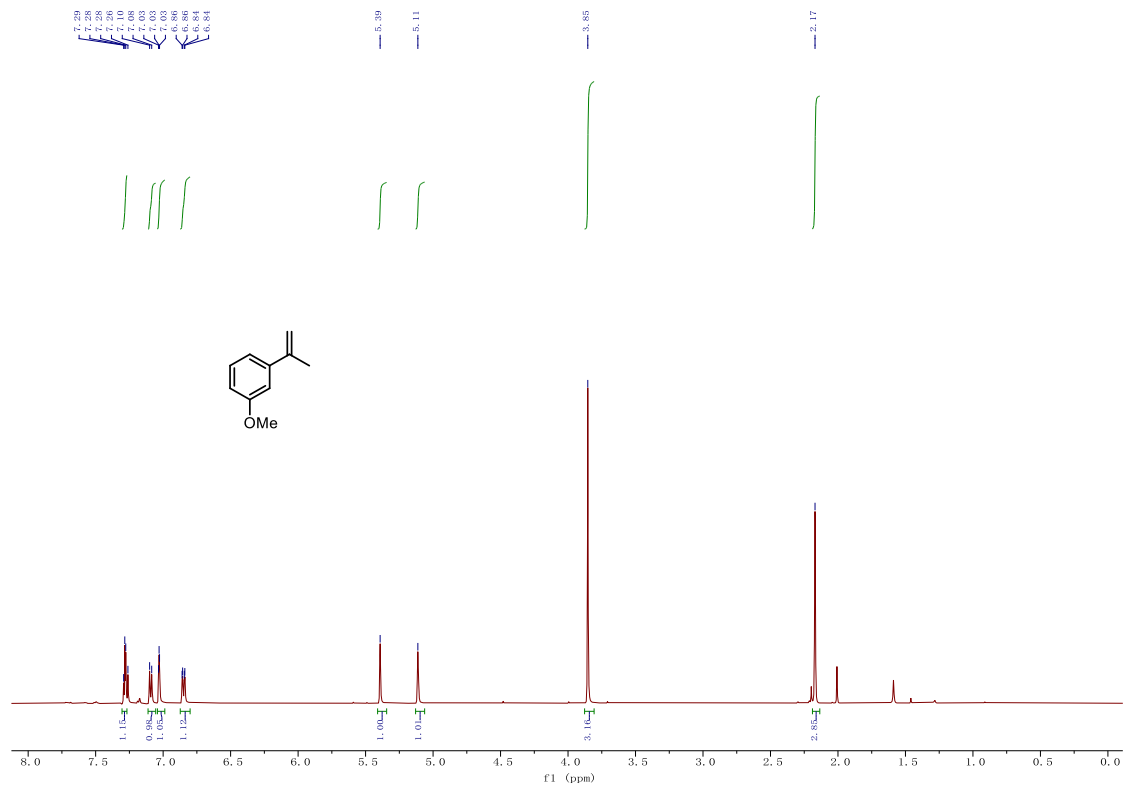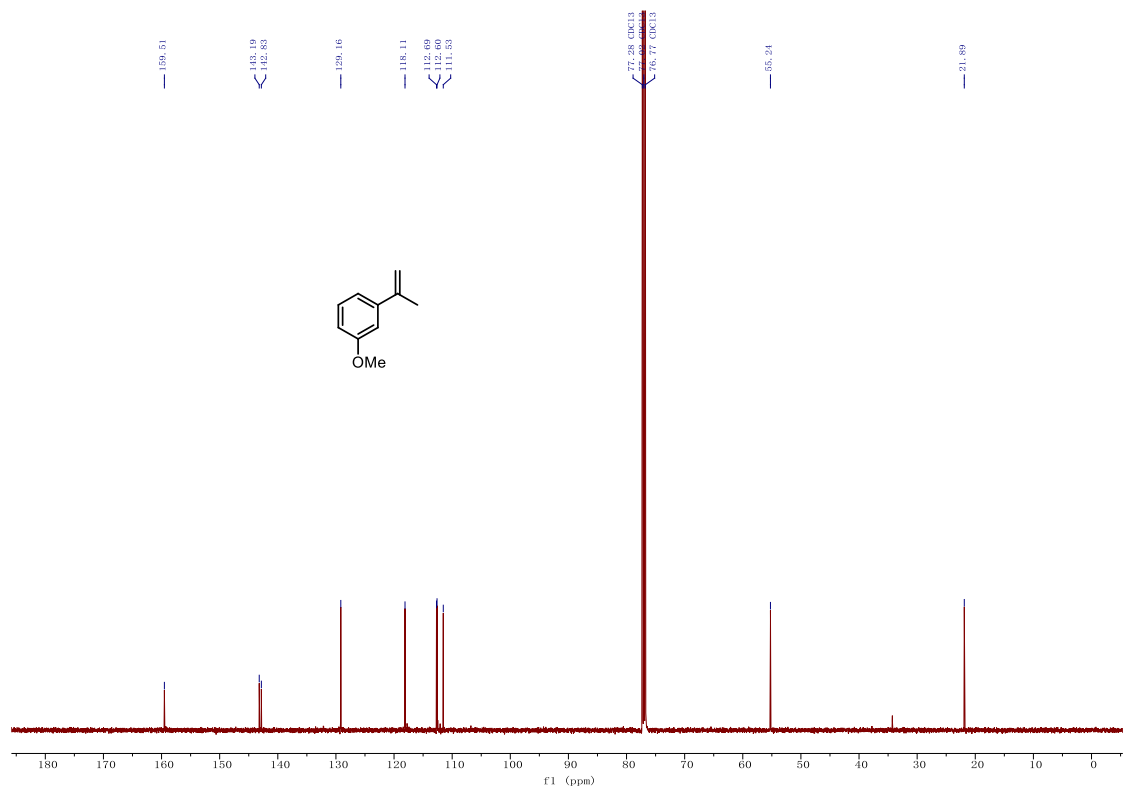

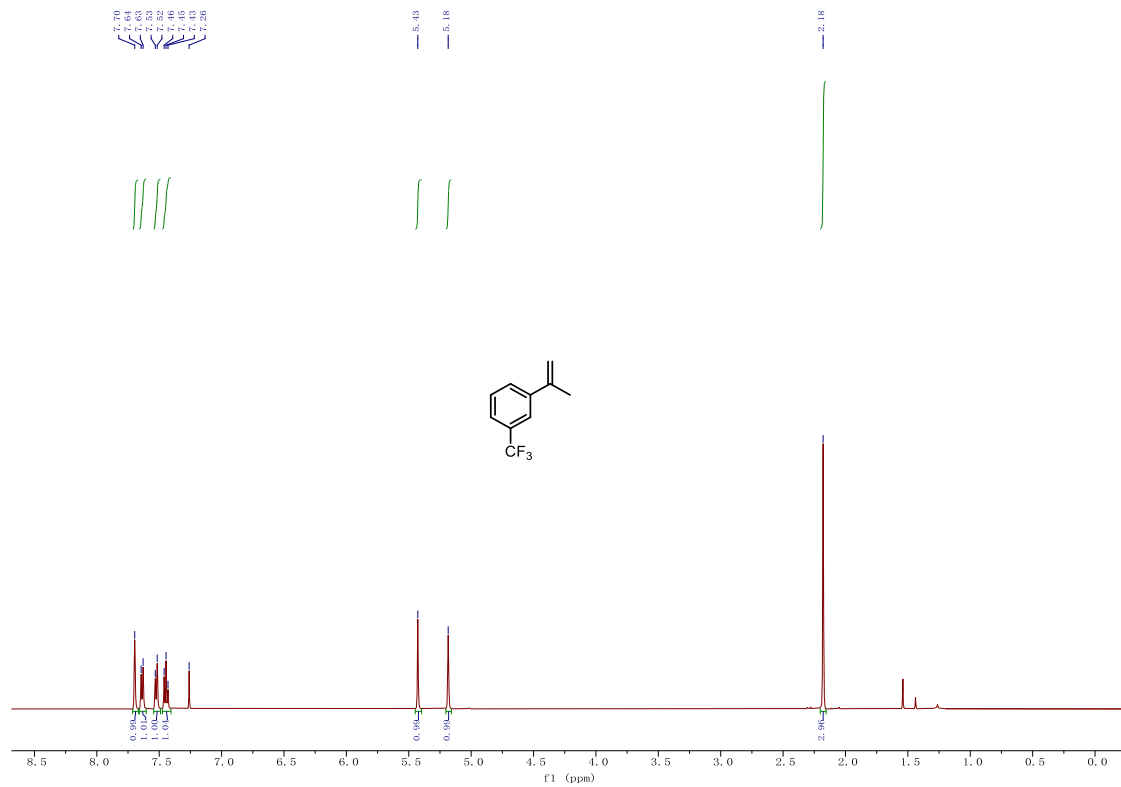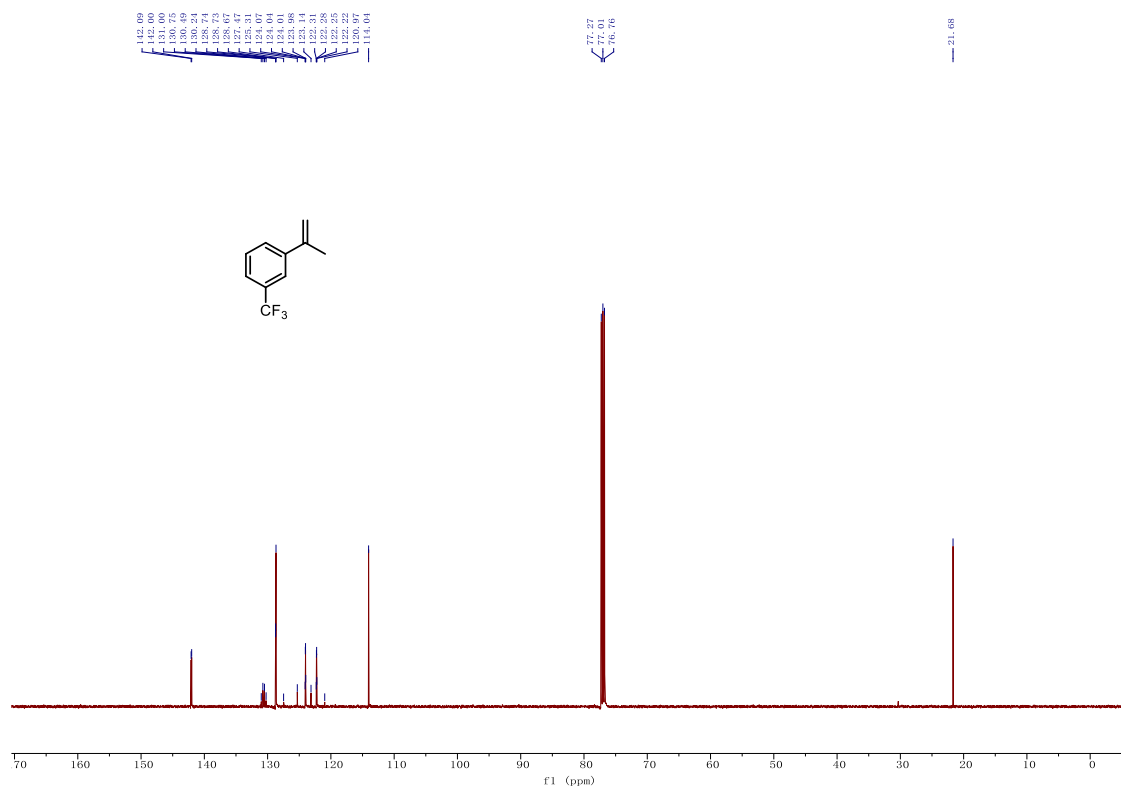

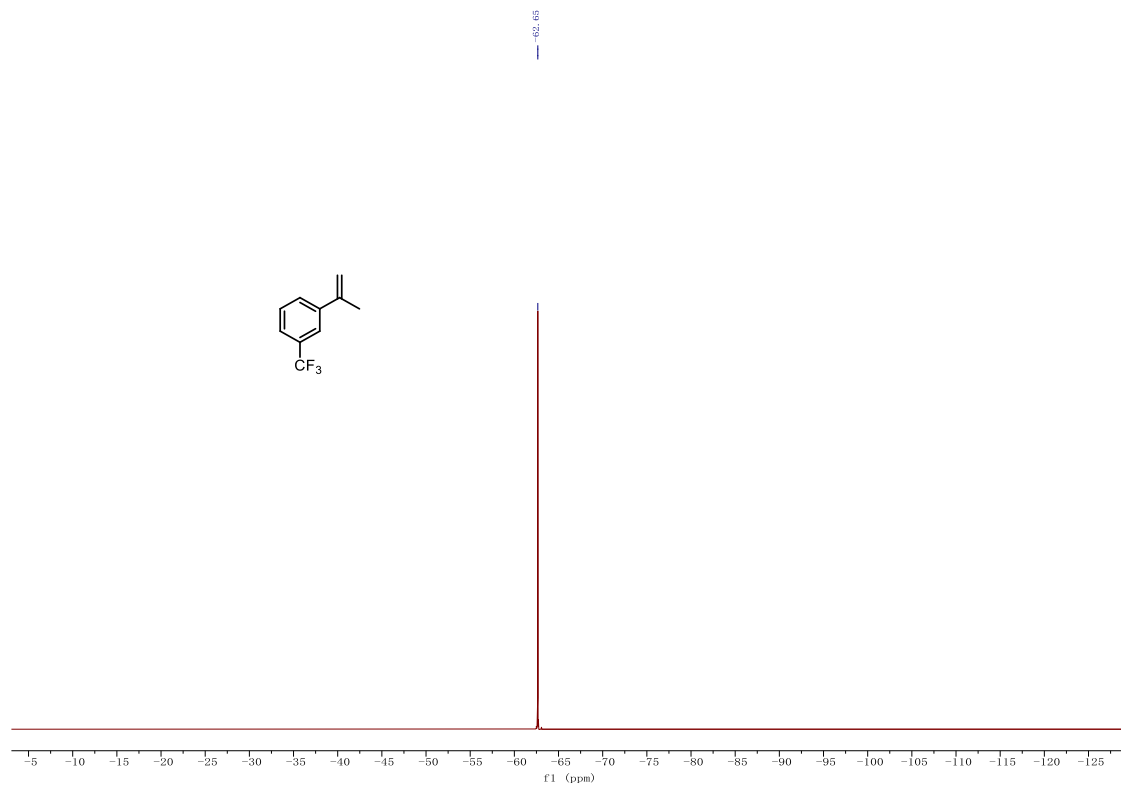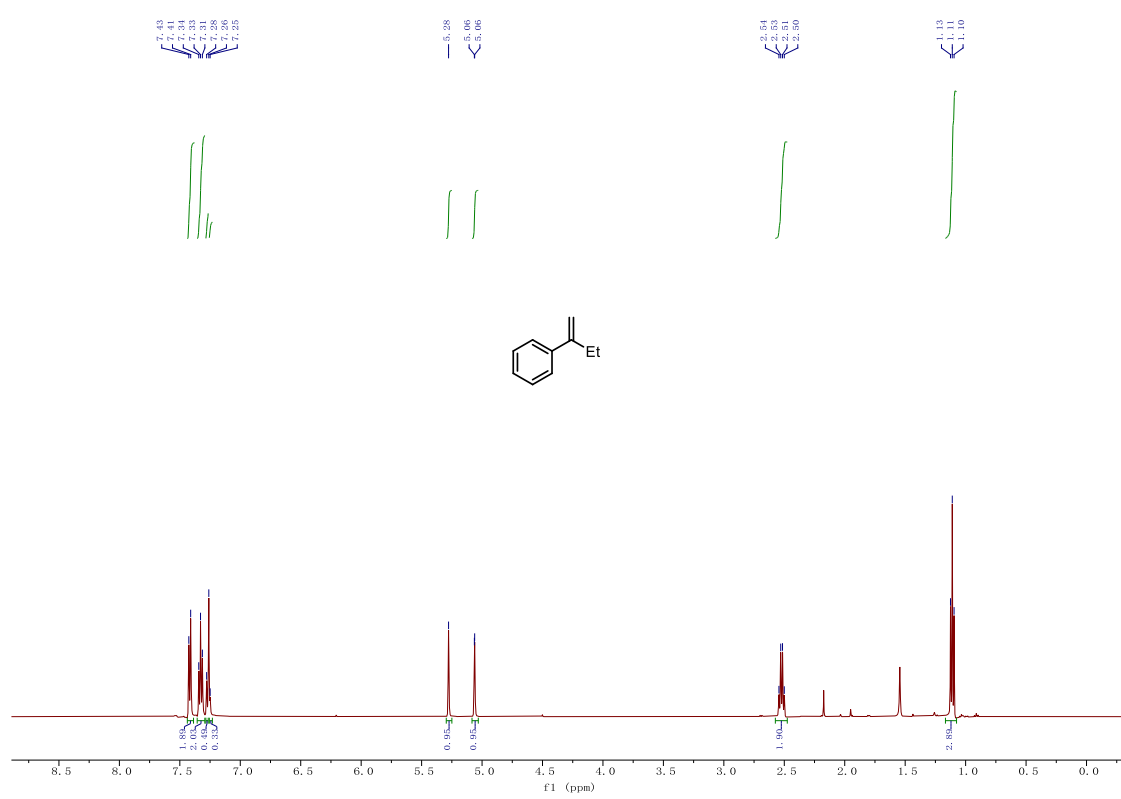

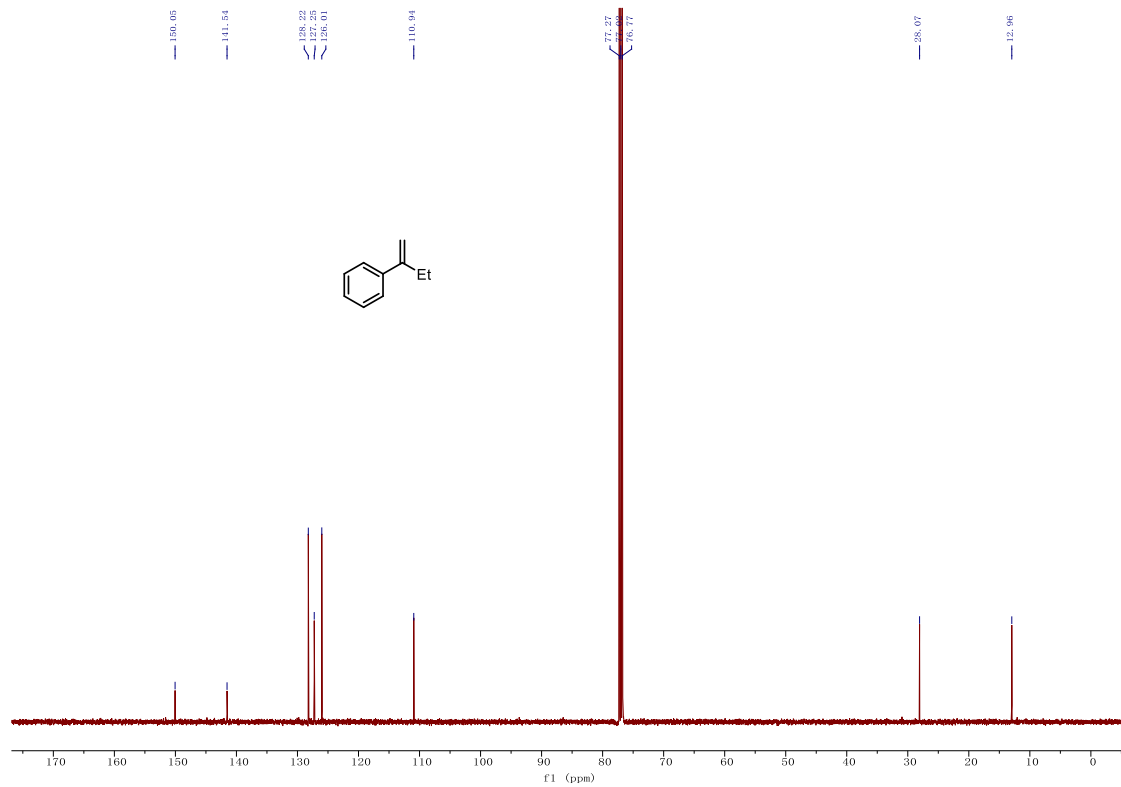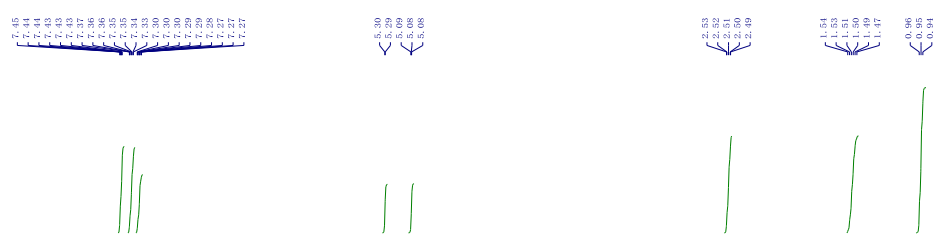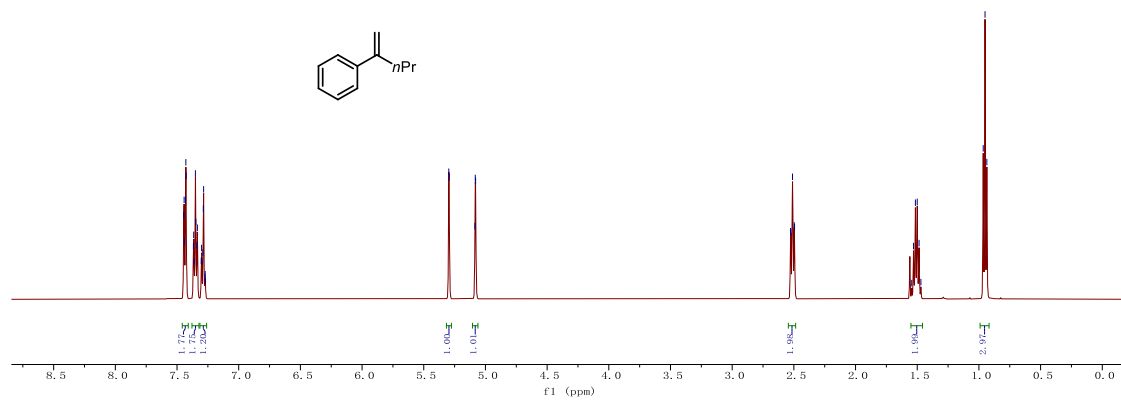

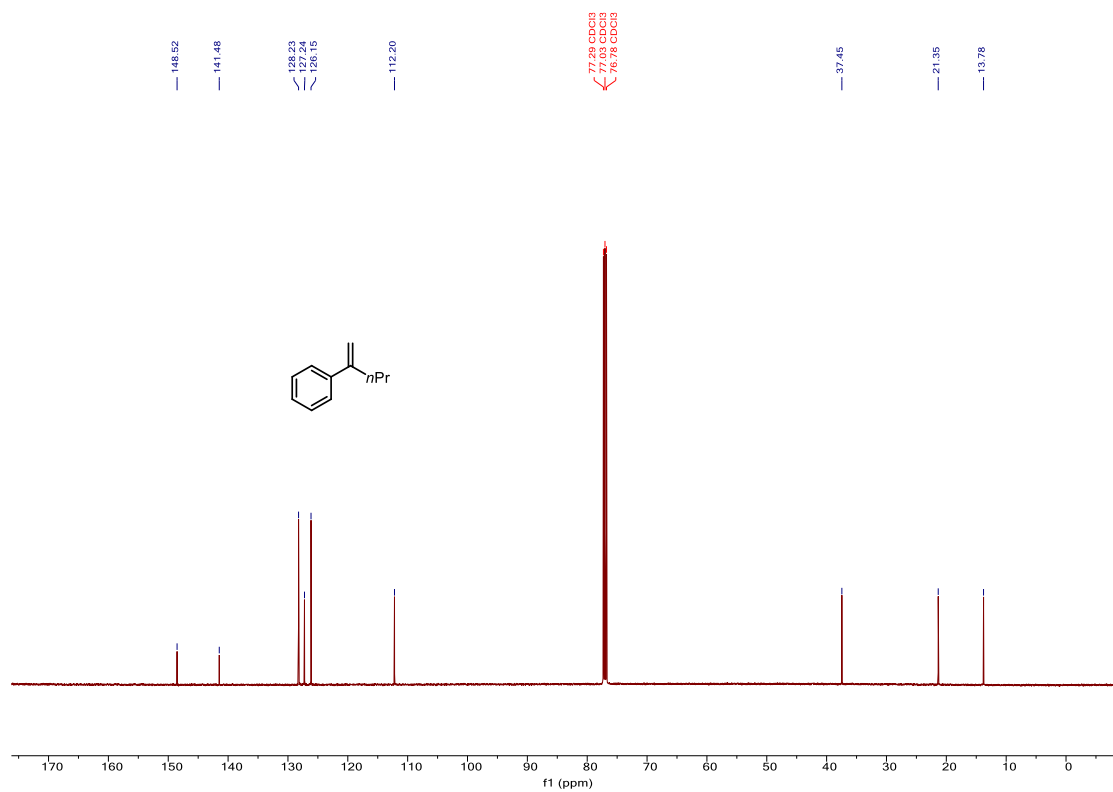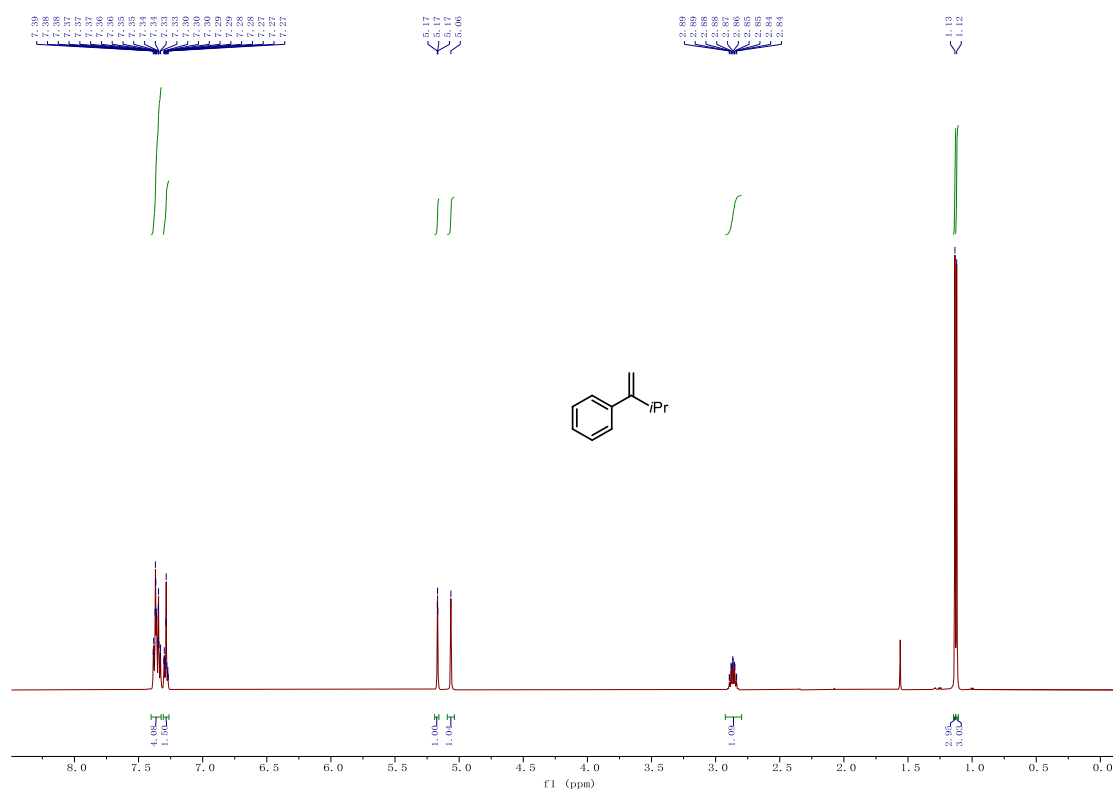

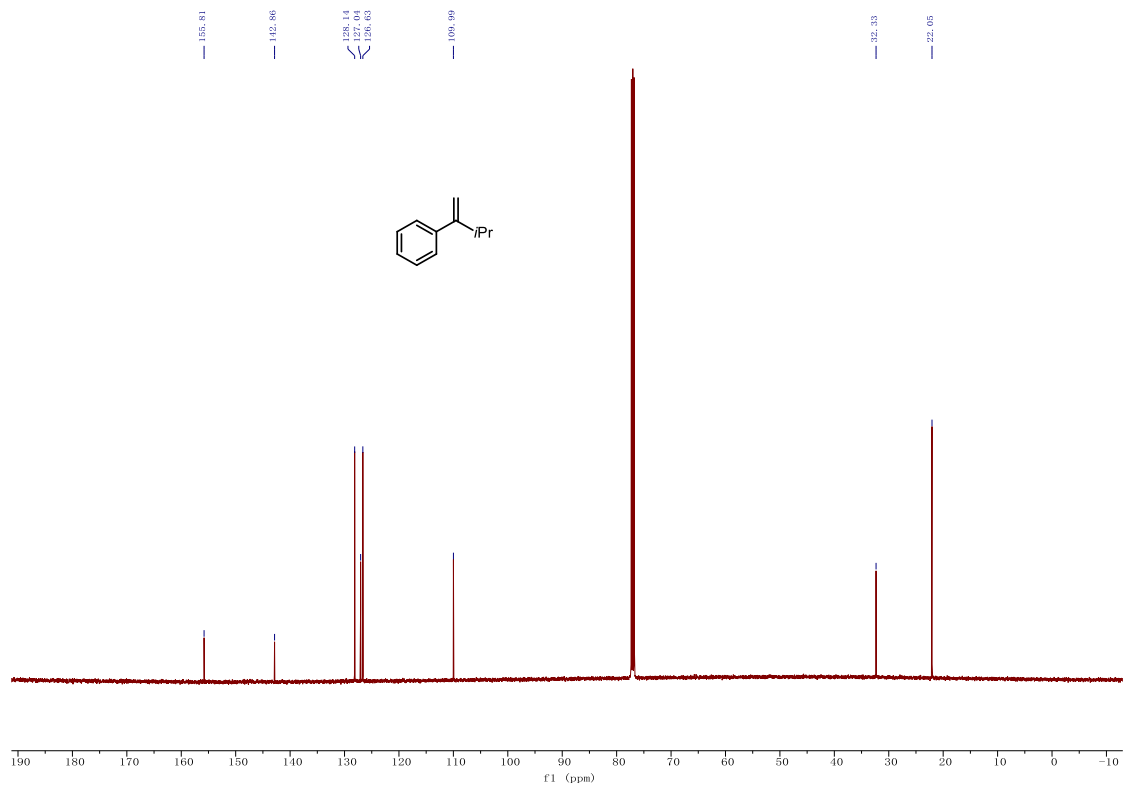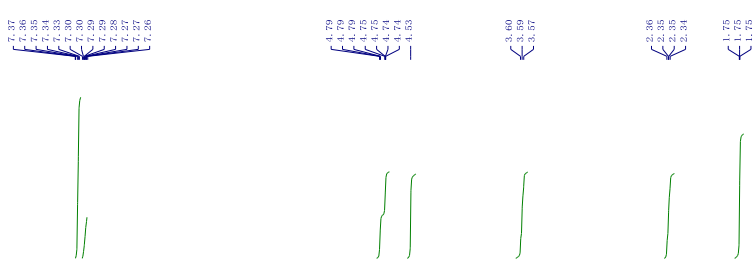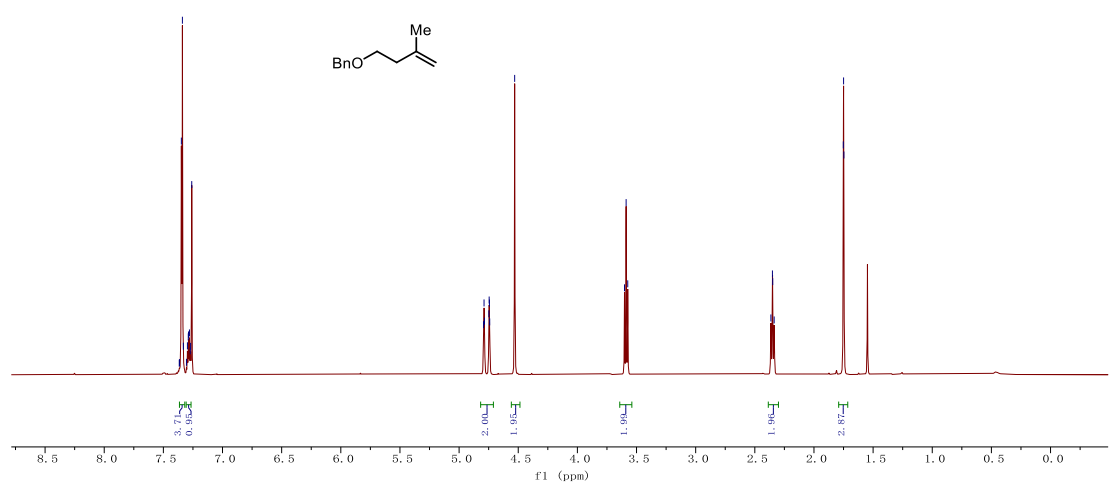



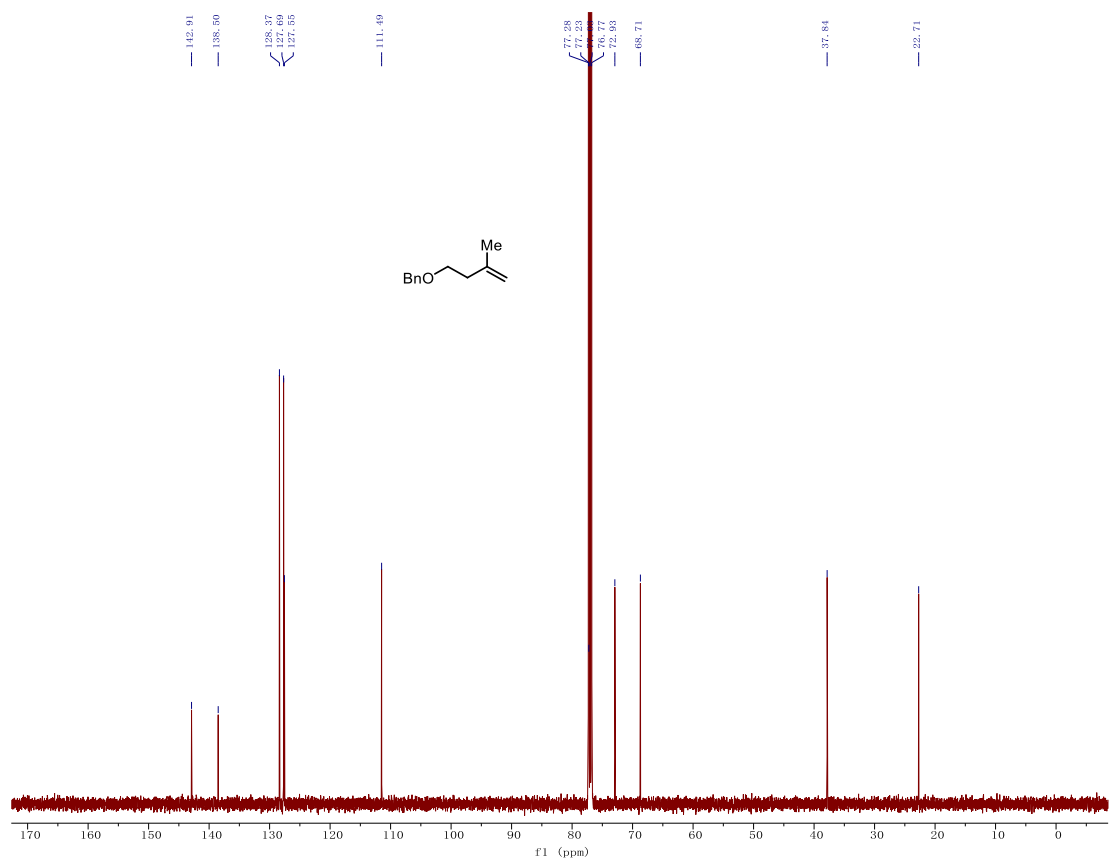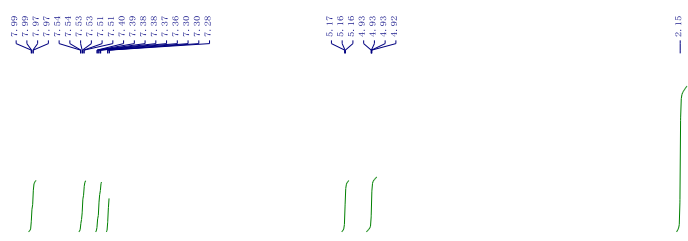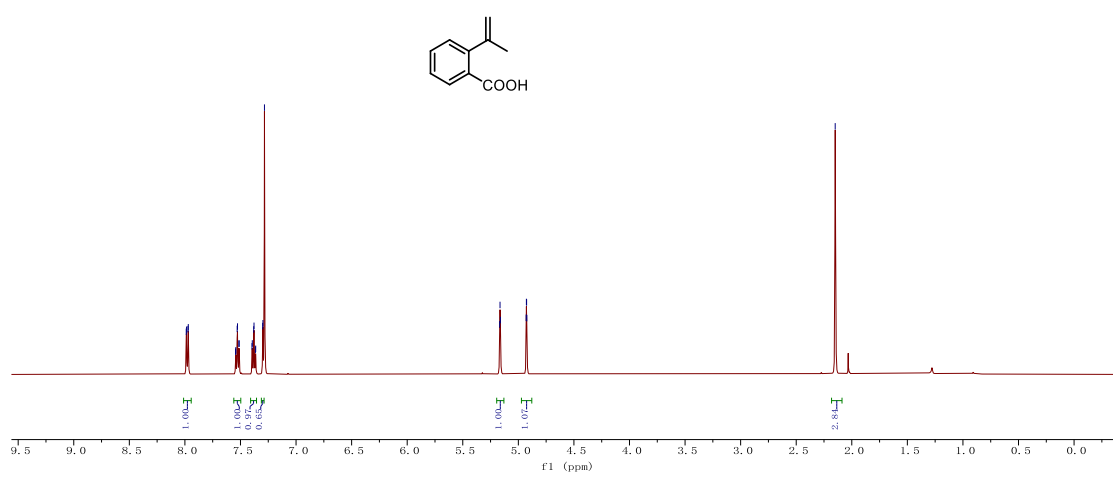

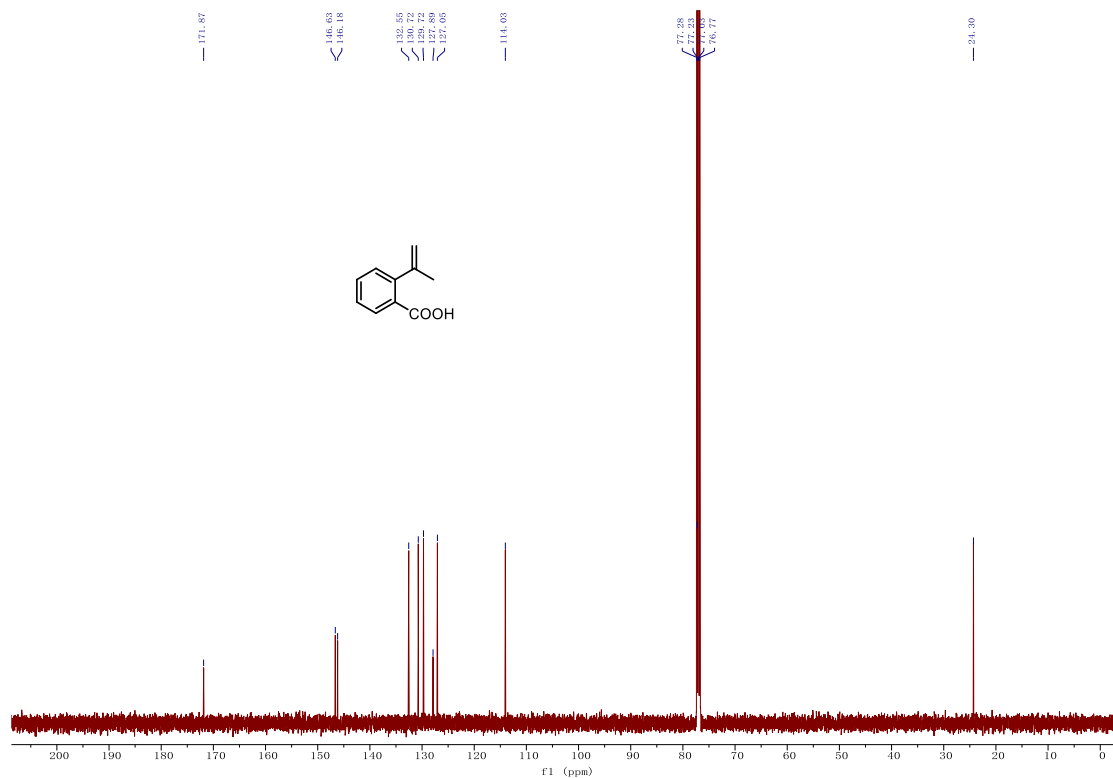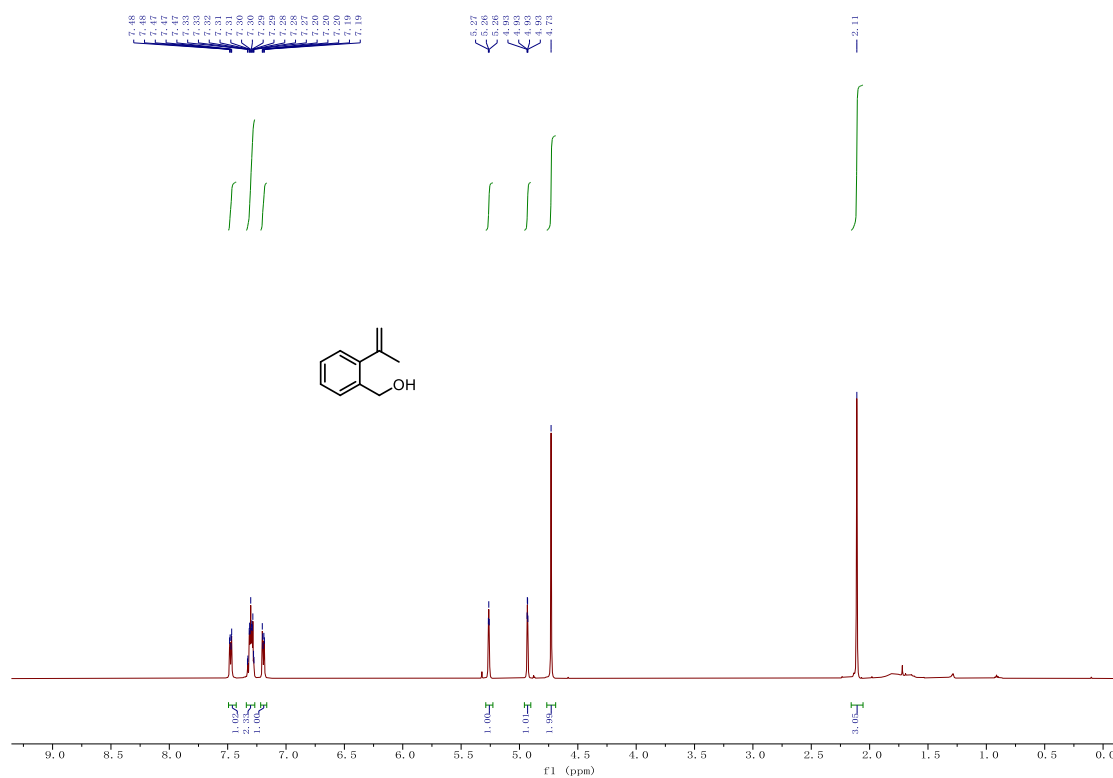

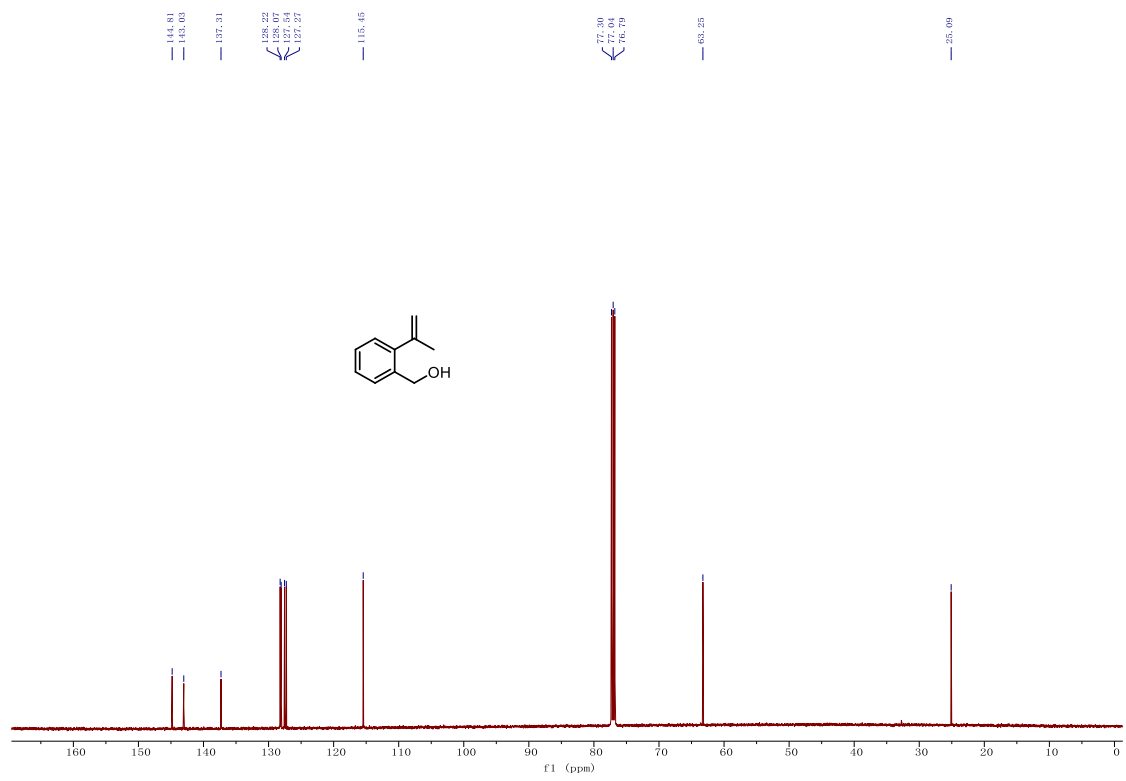

## References

1. Gibson, D. G. et al. Enzymatic assembly of DNA molecules up to several hundred kilobases. *Nat. Methods* **6**, 343-345 (2009).
2. Fu, H. et al. *J. Am. Chem. Soc.* **145**, 787-793 (2023)
3. Black, M. J. et al. Asymmetric redox-neutral radical cyclization catalysed by flavin-dependent 'ene'-reductases. *Nat. Chem.* **12**, 71–75 (2020).
4. Biegasiewicz, K. F. et al. Photoexcitation of flavoenzymes enables a stereoselective radical cyclization. *Science* **364**, 1166-1169 (2019).
5. Fu, H. et al. ground-state electron transfer as an initiation mechanism for biocatalytic C-C bond forming reactions. *J. Am. Chem. Soc.* **143**, 9622-9629 (2021).
6. Speckmeier, E., Fuchs, P. J. W. & Zeitler, K. A synergistic LUMO lowering strategy using Lewis acid catalysis in water to enable photoredox catalytic, functionalizing C–C cross-coupling of styrenes. *Chem. Sci.*, **9**, 7096-7103 (2018).
7. Sha, W., Zhang, W., Ni, S., Mei, H., Han, J. & Pan, Y. Photoredox-catalyzed cascade difluoroalkylation and intramolecular cyclization for construction of fluorinated  $\gamma$ -butyrolactones. *J. Org. Chem.* **82**, 9824-9831 (2017).
8. Li, J., Li, J., He, R., Liu, J., Liu, Y., Chen, L., Huang, Y. & Li, Y. Selective synthesis of substituted pyridines and pyrimidines through cascade annulation of isopropene derivatives. *Org. Lett.* **24**, 1620-1625 (2022).
9. Liu, Z., Chen, L., Zhu, D. & Zhu, S. Formal allylation and enantioselective cyclopropanation of donor/acceptor rhodium(II) azavinyl carbenes. *Org. Lett.* **23**, 1275-1279 (2021).
10. Pratsch, G. & Overman, L. E. Synthesis of 2,5-diaryl-1,5-dienes from allylic bromides using visible-light photoredox catalysis. *J. Org. Chem.* **80**, 11388-11397 (2015).
11. Phan, D. H. T., Kou, K. G. M., & Dong, V. M. Enantioselective desymmetrization of cyclopropenes by hydroacylation. *J. Am. Chem. Soc.* **132**, 16354-16355 (2010).
12. Zhang, S., Bedi, D., Cheng, L., Unruh, D. K., Li, G. & Findlater, M. Cobalt(II)-catalyzed stereoselective olefin isomerization: facile access to acyclic trisubstituted alkenes. *J. Am. Chem. Soc.* **142**, 8910-8917 (2020).
13. Walker, J. C. L. & Oestreich, M. Regioselective transfer hydrodeuteration of alkenes with an hydrogen deuterid surrogate using  $B(C_6F_5)_3$  catalysis. *Org. Lett.* **20**, 6411-6414 (2018).
14. Cleary, P. A. & Woerpel, K. A. Metal-catalyzed rearrangement of homoallylic ethers to silylmethyl allylic silanes in the presence of a di-tert-butylsilylene Source. *Org. Lett.* **7**, 5531-5533 (2005).
15. Qiao, Z., Wang, P., Ni, J., Li, D., Sun, Y., Li, T. & Li, M. Triflic imide-catalyzed glycosylation of disarmed glycosyl ortho-isopropenylphenylacetates and ortho-isopropenylbenzyl thioglycosides. *Eur. J. Org. Chem.* e202101367 (2022).
16. Hemric, B. N., Shen, K. & Wang, Q. Copper-catalyzed amino lactonization and amino oxygenation of alkenes using O-benzoylhydroxylamines. *J. Am. Chem. Soc.* **138**, 18, 5813-5816 (2016).
17. Sun, S., Yang, Y., Zhao, R., Zhang, D. & Liu, L. Site- and enantiodifferentiating  $C(sp^3)$ -H oxidation enables asymmetric access to structurally and stereochemically diverse saturated cyclic ethers. *J. Am. Chem. Soc.* **142**, 19346-19353 (2020).
18. Silvi, M., Sandford, C. & Aggarwal, V. K. Merging photoredox with 1,2-metallate rearrangements: the photochemical alkylation of vinyl boronate complexes. *J. Am. Chem. Soc.* **139**, 5736-5739 (2017).

19. Too, P. C., Tnay, Y. L. & Chiba, S. Copper-catalyzed aerobic aliphatic C–H oxygenation with hydroperoxides. *Beilstein J. Org. Chem.* **9**, 1217-1225 (2013).
20. Chou, T.-H., Yu, B.-H. & Chein, R.-J. ZnI<sub>2</sub>/Zn(OTf)<sub>2</sub>-TsOH: A versatile combined-acid system for catalytic intramolecular hydrofunctionalization and polyene cyclization. *Chem. Commun.*, **55**, 13522-13525 (2019).
21. Frisch, M. J. et al. Gaussian 16, revision C.01 (Gaussian, Inc., 2016).
22. Chai, J. Da & Head-Gordon, M. Long-range corrected hybrid density functionals with damped atom–atom dispersion corrections. *Phys. Chem. Chem. Phys.* **10**, 6615–6620 (2008).
23. Miertus, S. & Tomasi, J. Approximate evaluations of the electrostatic free-energy and internal energy changes in solution processes. *Chem. Phys.* **65**, 239–245 (1982).
24. Miertus, S., Scrocco, E. & Tomasi, J. Electrostatic interaction of a solute with a continuum. A direct utilization of AB initio molecular potentials for the prevision of solvent effects. *Chem. Phys.* **55**, 117–129 (1981).
25. Pascual-ahuir, J. L., Silla, E. & Tunon, I. GEPOL: An improved description of molecular surfaces. III. A new algorithm for the computation of a solvent-excluding surface. *J. Comput. Chem.* **15**, 1127–1138 (1994).
26. CYLview20; Legault, C. Y., Université de Sherbrooke, 2020 (<http://www.cylview.org>).
27. Breugst, M., Eschenmoser, A. & Houk, K. N. Theoretical exploration of the mechanism of riboflavin formation from 6,7-dimethyl-8-ribityllumazine: nucleophilic catalysis, hydride transfer, hydrogen atom transfer, or nucleophilic addition? *J. Am. Chem. Soc.* **135**, 6658–6668 (2013).
28. Saleem-Batcha, R., Stull, F., Sanders, J. N., Moore, B. S., Palfrey, B. A., Teufel, R. & Houk, K. N. Enzymatic control of dioxygen binding and functionalization of the flavin cofactor. *Proc. Natl. Acad. Sci. USA*, **115**, 4909-4914 (2018).
